# Supplementary material for: Sample Preparation Approach Influences PAM50 Risk of Recurrence Score in Early Breast Cancer
Source: MDPI journal article supplement (doi:10.3390/cancers13236118), 2021-12-04
Supplement: s1 [file s1]

**Supplementary Table S4: Comparison of subtype calls using Subtype-Prosigna and Subtype-Macro.** Both methods used the counts from nCounter based on analysis of FFPE tissue. Subtype-Macro in rows and Subtypes-Prosigna in columns.

| Macrodissected FFPE |               | Subtype-Prosigna |               |           |           |                              |
|---------------------|---------------|------------------|---------------|-----------|-----------|------------------------------|
|                     |               | Basal-like       | HER2-enriched | Luminal A | Luminal B | Normal-like (not applicable) |
| Subtype-Macro       | Basal-like    | 12               |               |           |           | -                            |
|                     | HER2-enriched | 1                | 5             | 2         | 1         | -                            |
|                     | Luminal A     |                  |               | 46        | 8         | -                            |
|                     | Luminal B     |                  | 1             |           | 17        | -                            |
|                     | Normal-like   |                  |               | 1         |           | -                            |

**Supplementary Table S5: ROR, subtype and correlation to the five gene expression centroids for the 14 discordant cases.** The correlation values are from the Subtype-Macro algorithm based on the FFPE tumor tissue.

| SampleID | ROR-Prosigna | Subtype-Prosigna | Subtype-Macro | Basal-like | HER2-enriched | Luminal-A | Luminal-B | Normal-like |
|----------|--------------|------------------|---------------|------------|---------------|-----------|-----------|-------------|
| BC-06    | 79           | HER2-enriched    | Luminal B     | -0.26      | 0.27          | 0.12      | 0.39      | -0.18       |
| BC-14    | 60           | Luminal B        | Luminal A     | -0.35      | -0.28         | 0.43      | 0.42      | -0.24       |
| BC-19    | 62           | Luminal B        | Luminal A     | -0.37      | -0.1          | 0.5       | 0.23      | -0.23       |
| BC-27    | 61           | Luminal B        | Luminal A     | -0.29      | -0.26         | 0.26      | 0.18      | -0.1        |
| BC-28    | 72           | Basal-like       | HER2-enriched | 0.42       | 0.55          | -0.6      | -0.05     | -0.31       |
| BC-38    | 55           | Luminal B        | Luminal A     | -0.3       | 0.03          | 0.23      | 0.19      | -0.18       |
| BC-47    | 60           | Luminal B        | Luminal A     | -0.47      | 0             | 0.49      | 0.47      | -0.27       |
| BC-52    | 19           | Luminal A        | Normal-like   | -0.14      | -0.28         | 0.5       | -0.51     | 0.68        |
| BC-55    | 47           | Luminal B        | Luminal A     | -0.7       | 0.09          | 0.7       | 0.49      | -0.34       |
| BC-58    | 46           | Luminal A        | HER2-enriched | -0.39      | 0.26          | 0.23      | 0.06      | -0.19       |
| BC-61    | 68           | Luminal B        | Luminal A     | -0.56      | -0.04         | 0.59      | 0.5       | -0.38       |
| BC-63    | 42           | Luminal A        | HER2-enriched | 0.18       | 0.34          | -0.3      | -0.42     | 0.27        |
| BC-65    | 62           | Luminal B        | HER2-enriched | -0.43      | 0.36          | 0.1       | 0.33      | -0.5        |
| BC-88    | 57           | Luminal B        | Luminal A     | -0.71      | 0.08          | 0.63      | 0.59      | -0.41       |

**Supplementary Table S6: Comparison of subtype calls using Subtype-Macro and the genefu package.** Both methods used the counts from nCounter based on analysis of FFPE tissue. Subtype-Macro in rows and the genefu subtype in columns.

| Macrodissected FFPE |               | Genefu     |               |           |           |             |
|---------------------|---------------|------------|---------------|-----------|-----------|-------------|
|                     |               | Basal-like | HER2-enriched | Luminal A | Luminal B | Normal-like |
| Subtype-Macro       | Basal-like    | 12         |               |           |           |             |
|                     | HER2-enriched |            | 8             | 1         |           |             |
|                     | Luminal A     |            |               | 48        | 6         |             |
|                     | Luminal B     |            |               | 1         | 17        |             |
|                     | Normal-like   |            |               | 1         |           |             |

**Supplementary Table S7: Comparison of subtype calls in FFPE and FF tissue-derived data using genefu.** Gene expression data from macrodissected FFPE tumor tissue in rows and gene expression data from FF bulk tissue in columns.

| Subtype method:<br>Genefu |               | FF bulk    |               |           |           |             |
|---------------------------|---------------|------------|---------------|-----------|-----------|-------------|
|                           |               | Basal-like | HER2-enriched | Luminal A | Luminal B | Normal-like |
| Macro-dissected<br>FFPE   | Basal-like    | 12         |               |           |           |             |
|                           | HER2-enriched |            | 6             | 1         |           | 1           |
|                           | Luminal A     |            |               | 39        | 4         | 8           |
|                           | Luminal B     |            |               | 2         | 19        | 2           |
|                           | Normal-like   |            |               |           |           |             |
