# Supplementary figures and images for: Sample Preparation Approach Influences PAM50 Risk of Recurrence Score in Early Breast Cancer
Source: MDPI journal article supplement (doi:10.3390/cancers13236118), 2021-12-04

# ESR1 with ER cut off at 8.71

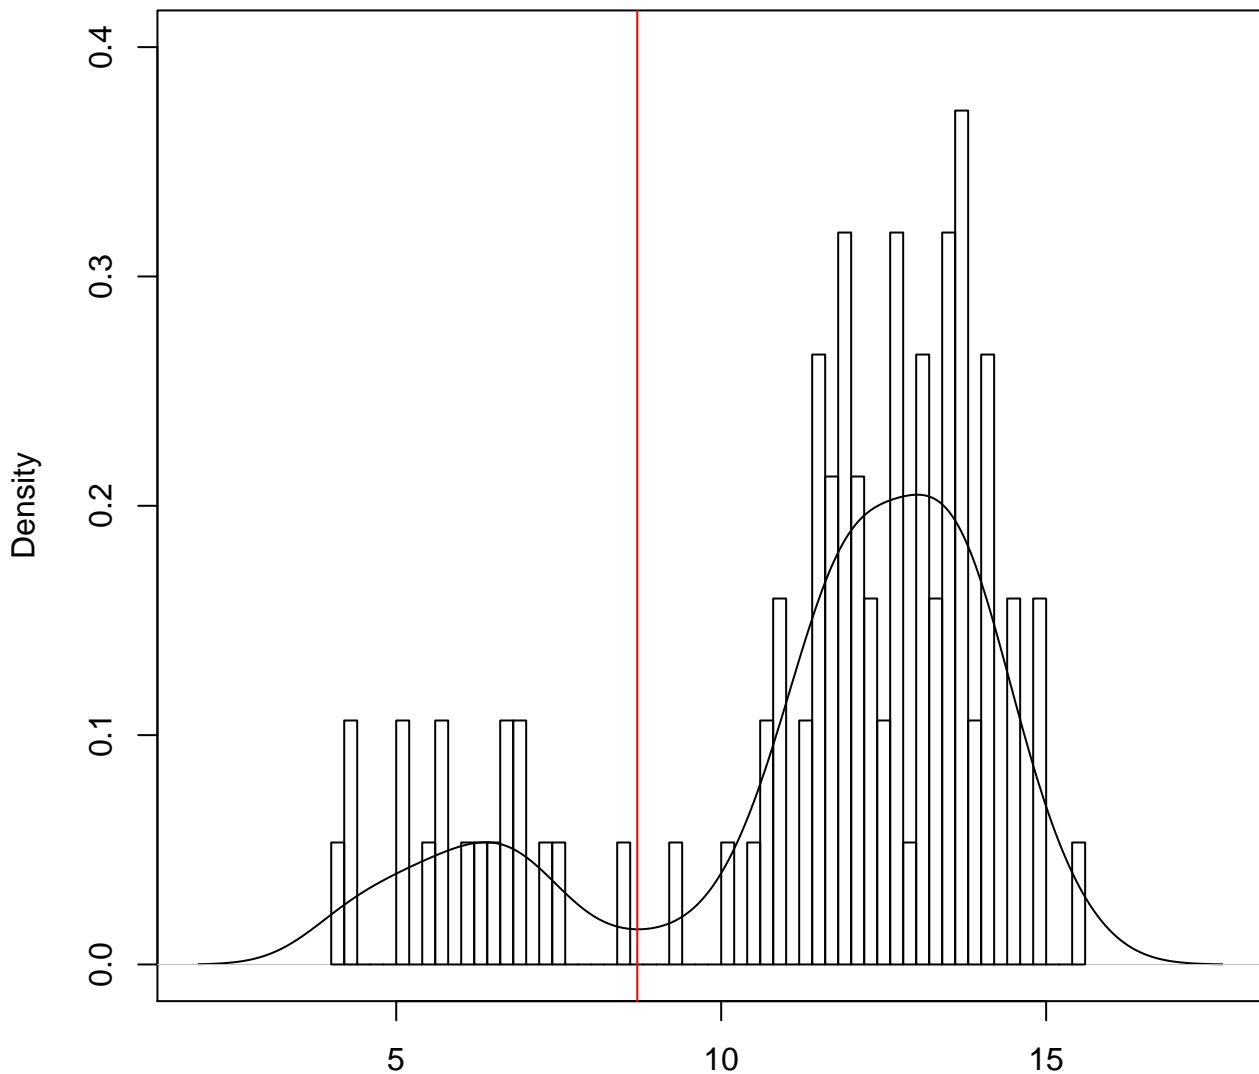

Supplement: s1 [file s1]

# ESR1 with ER cut off at 2.36

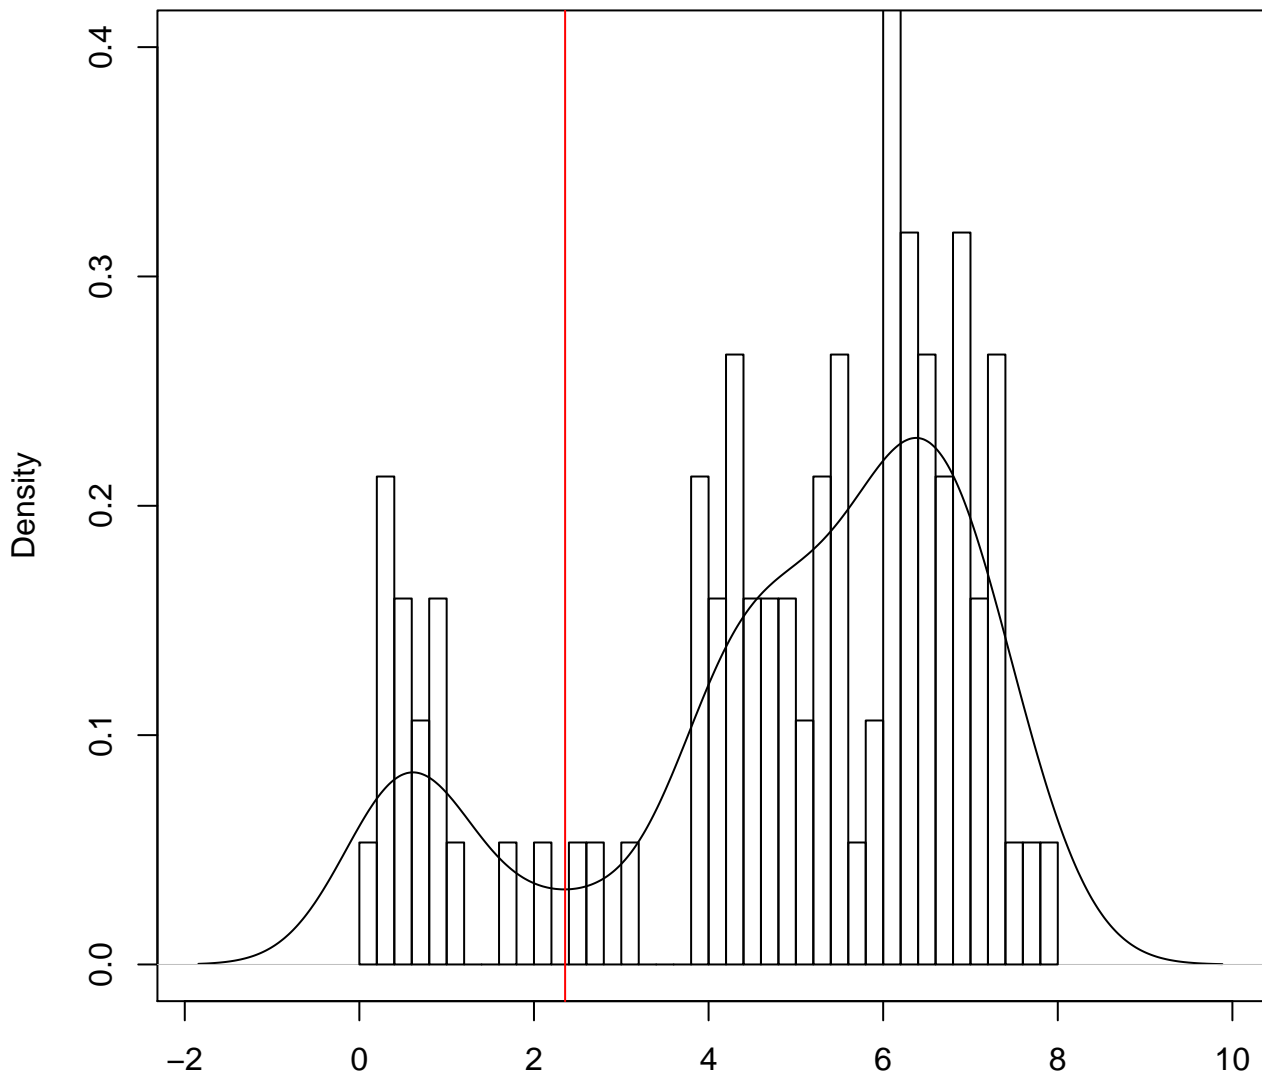

Supplement: s1 [file s1]

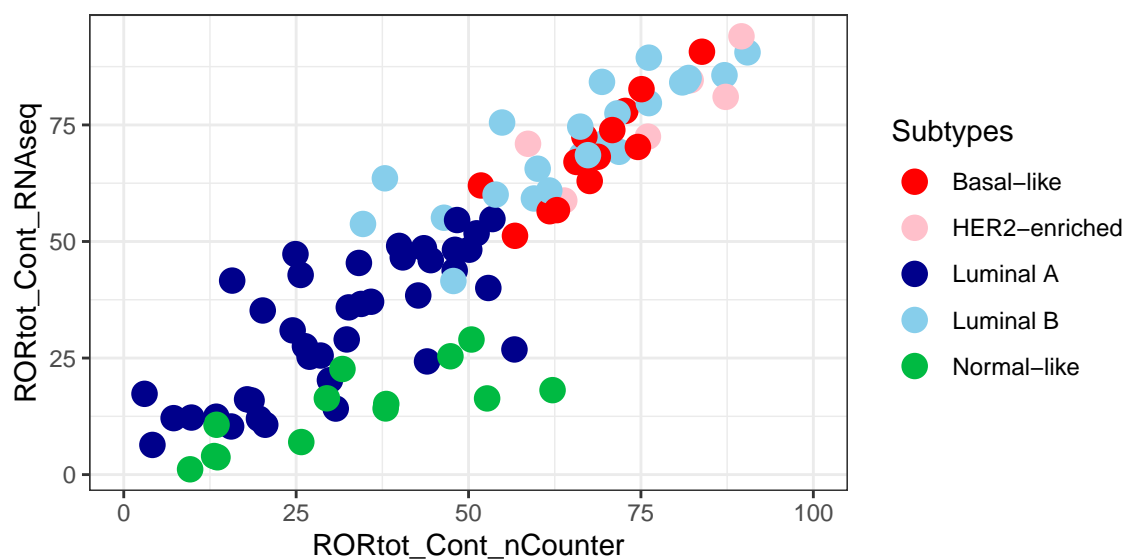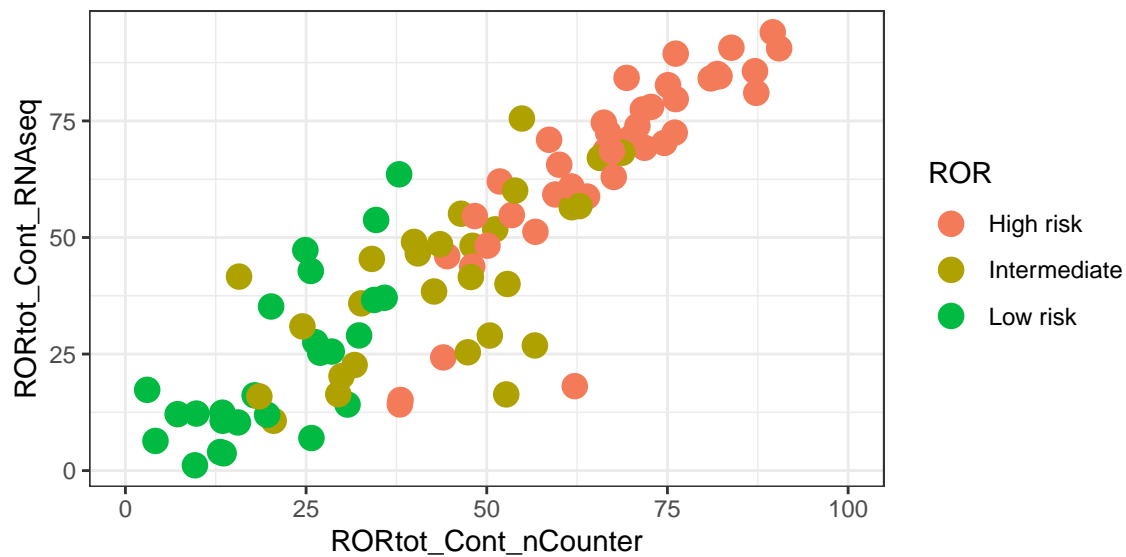

Supplement: s1 [file s1]

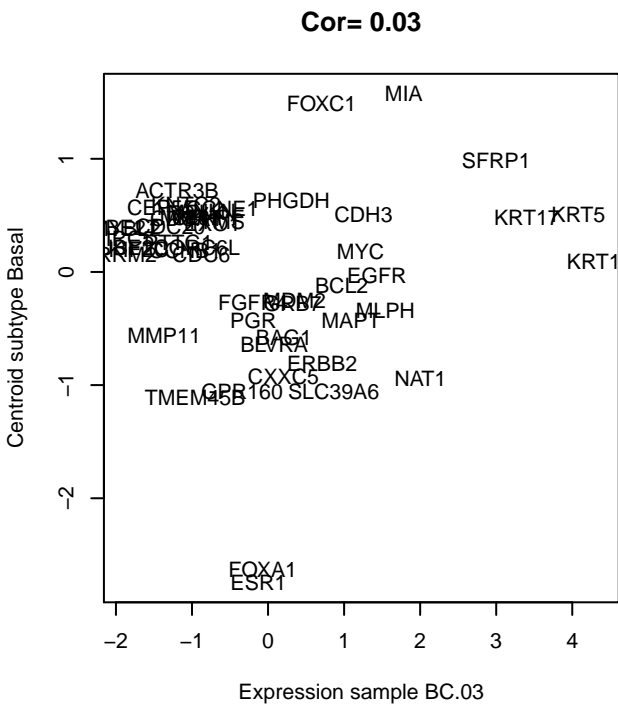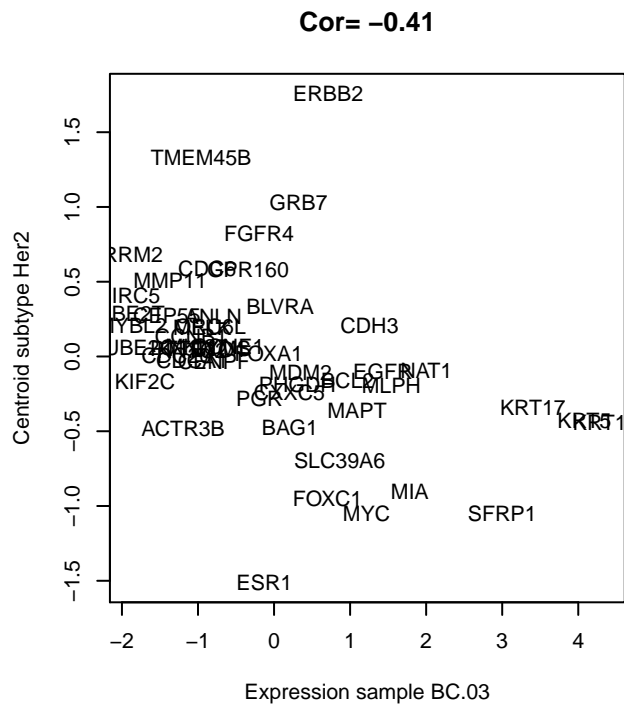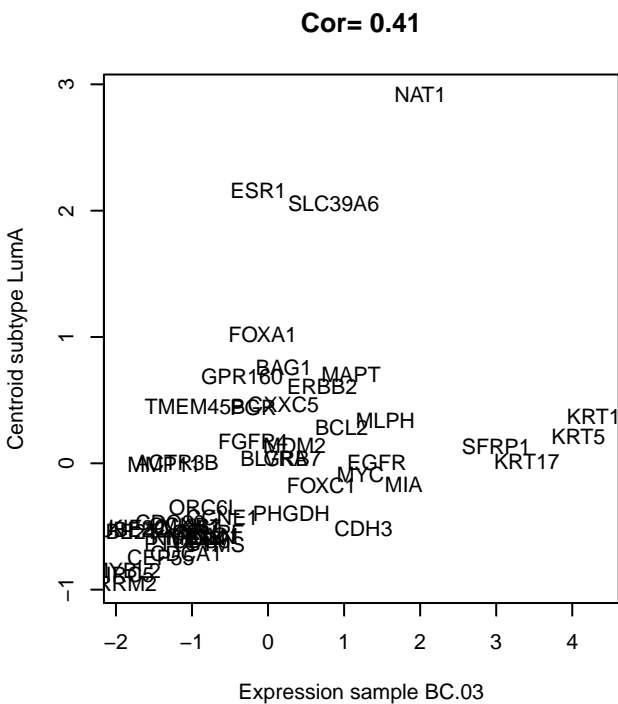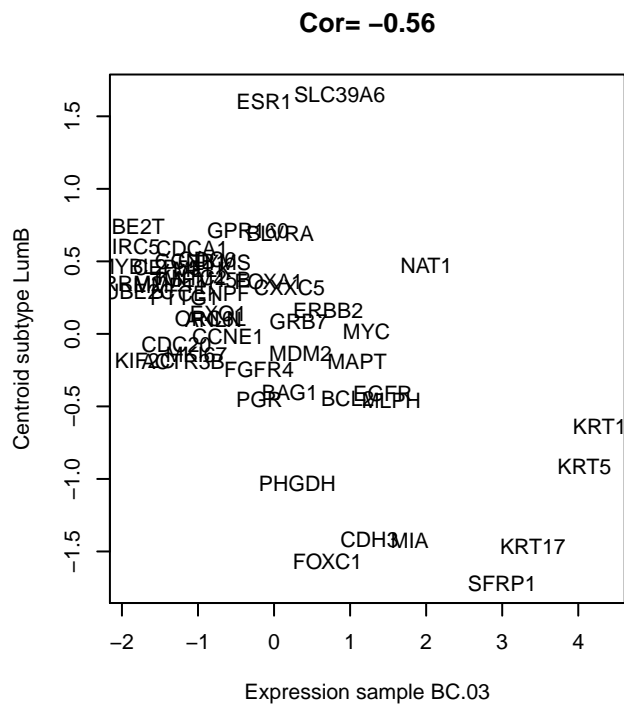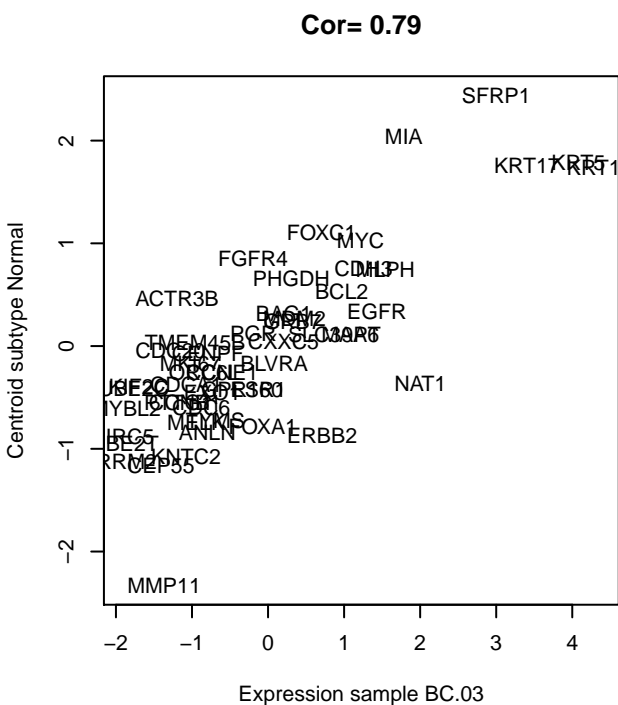



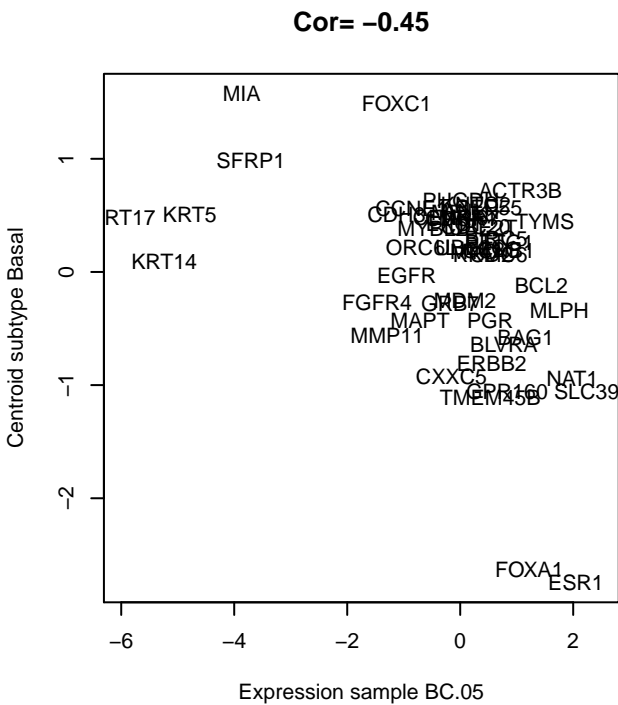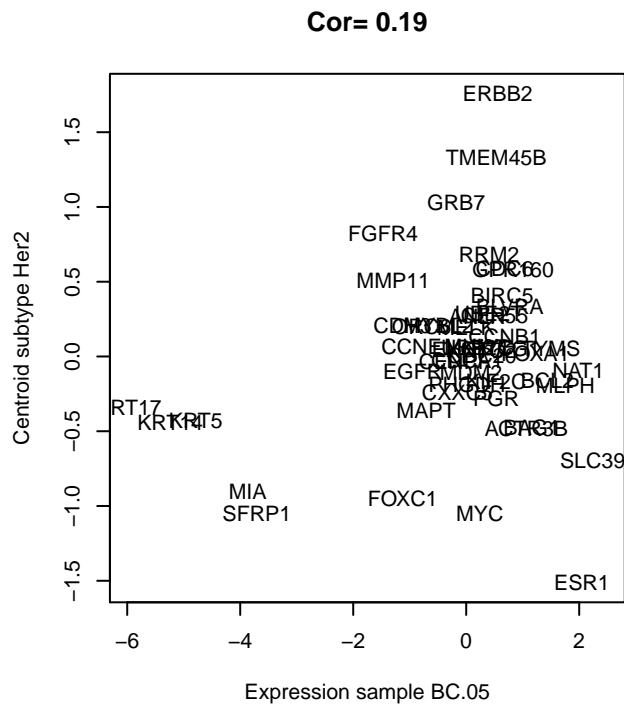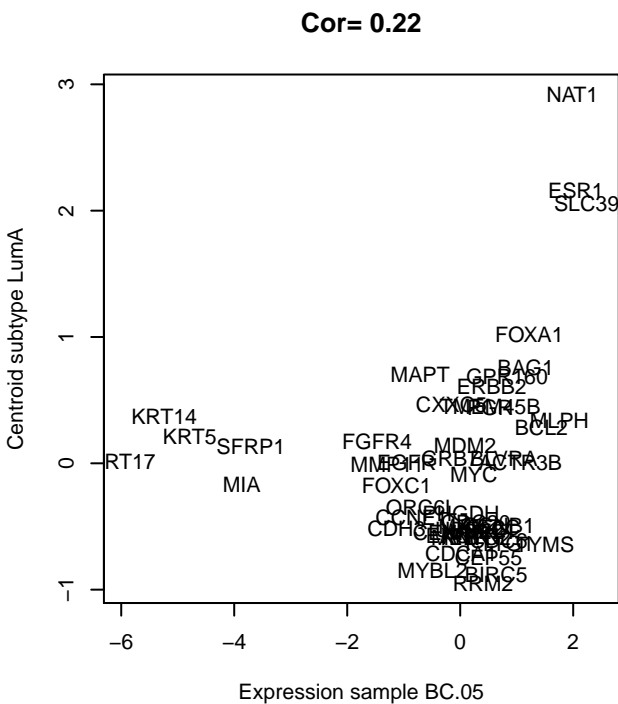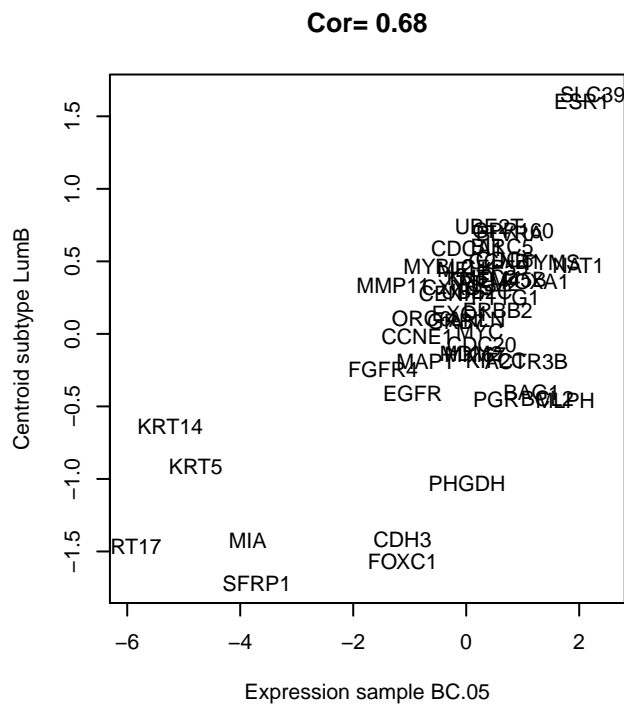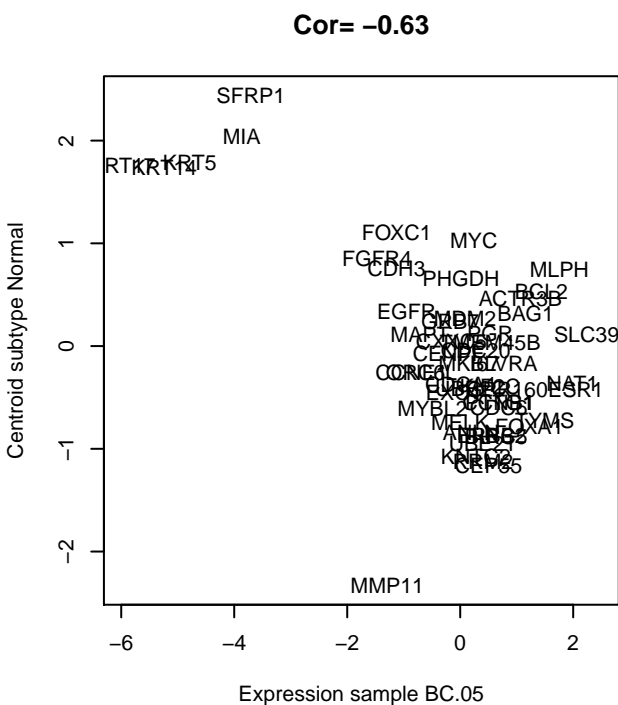

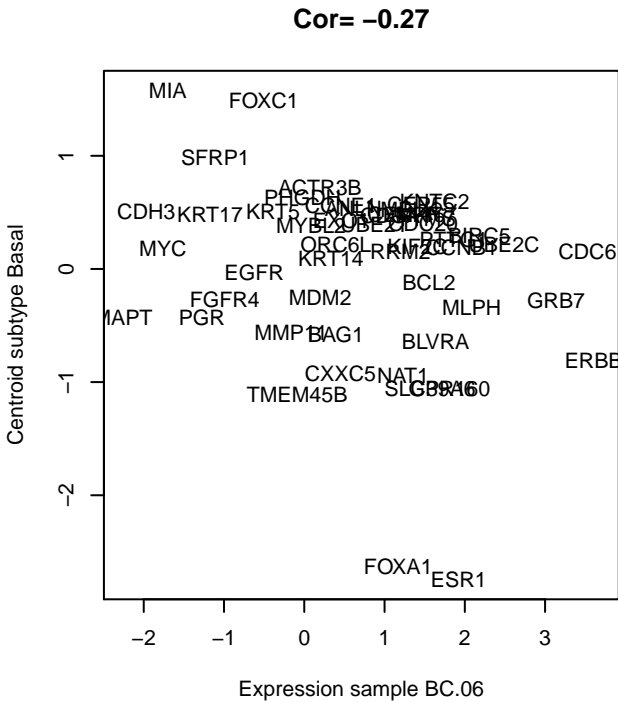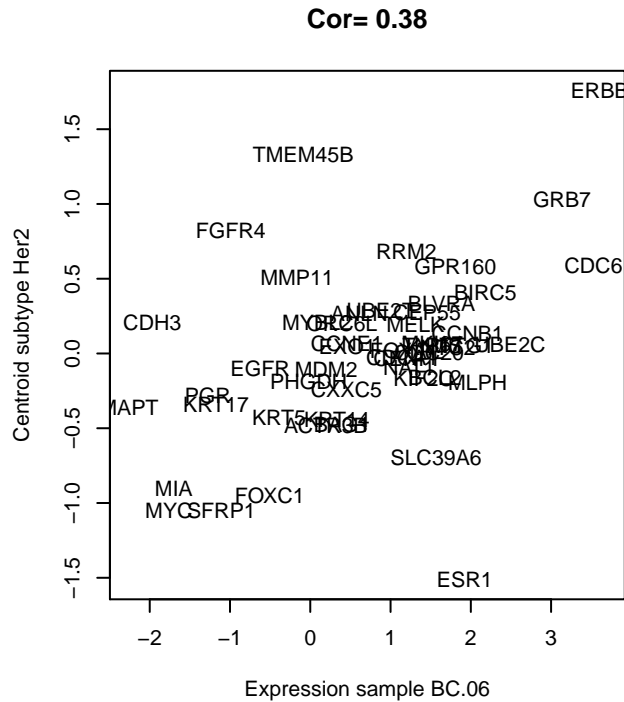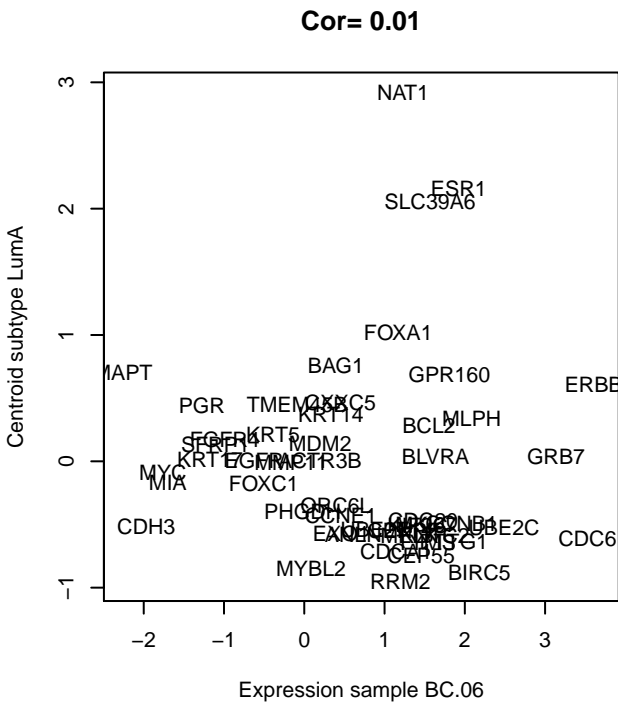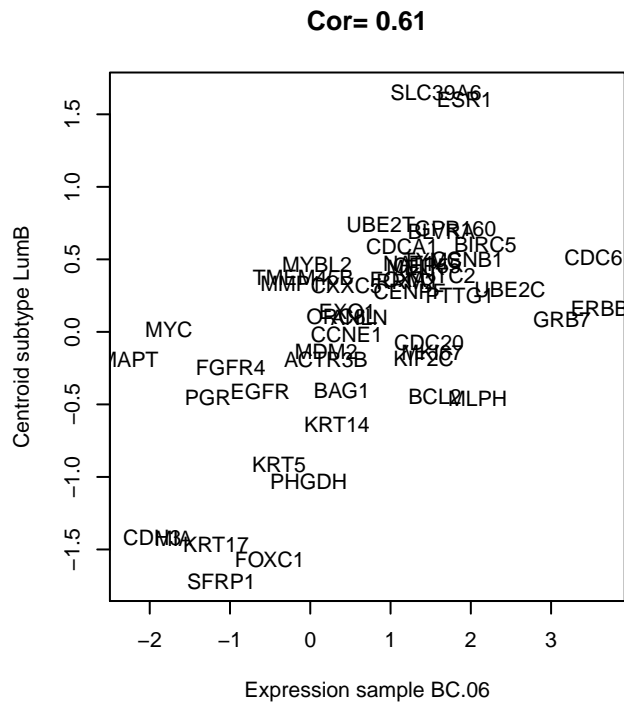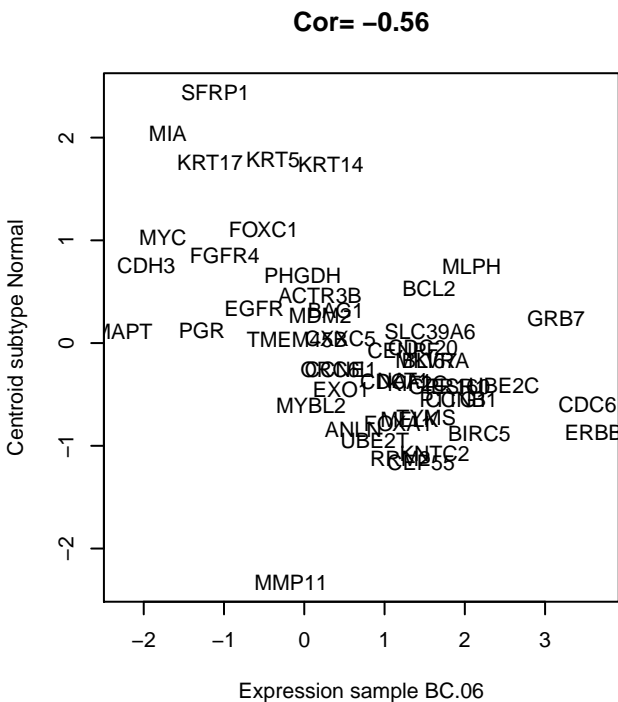

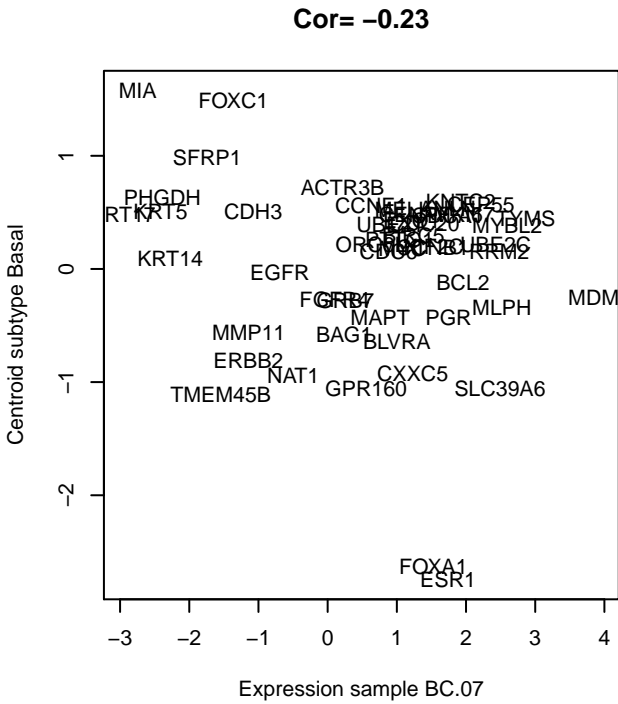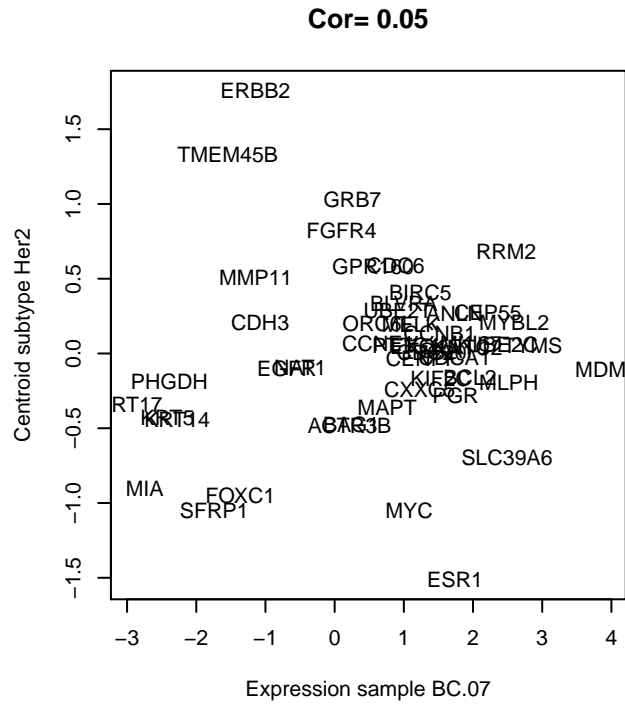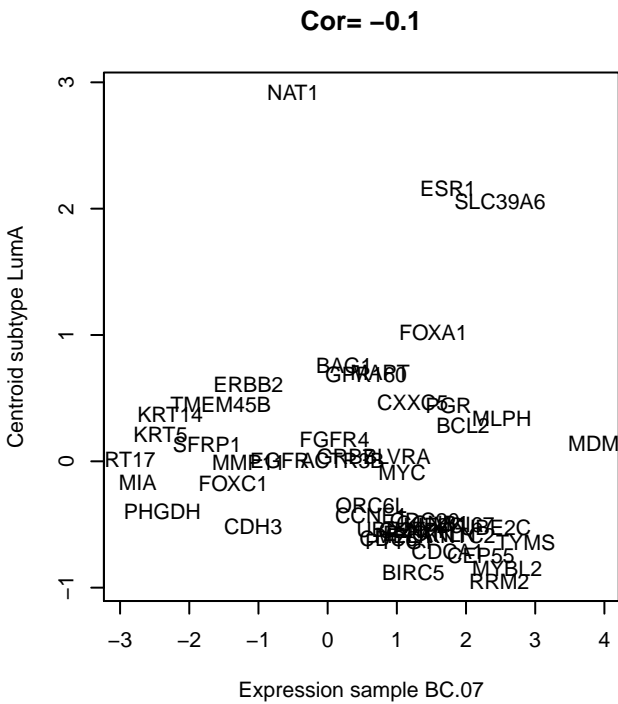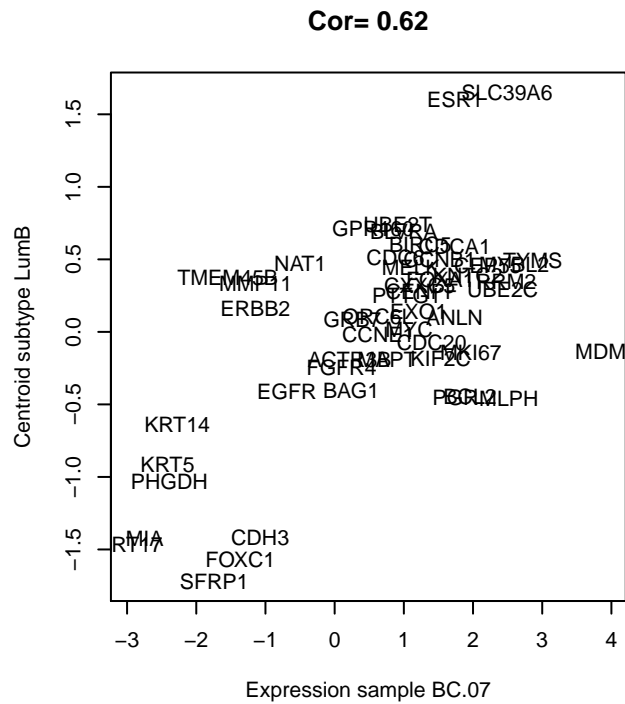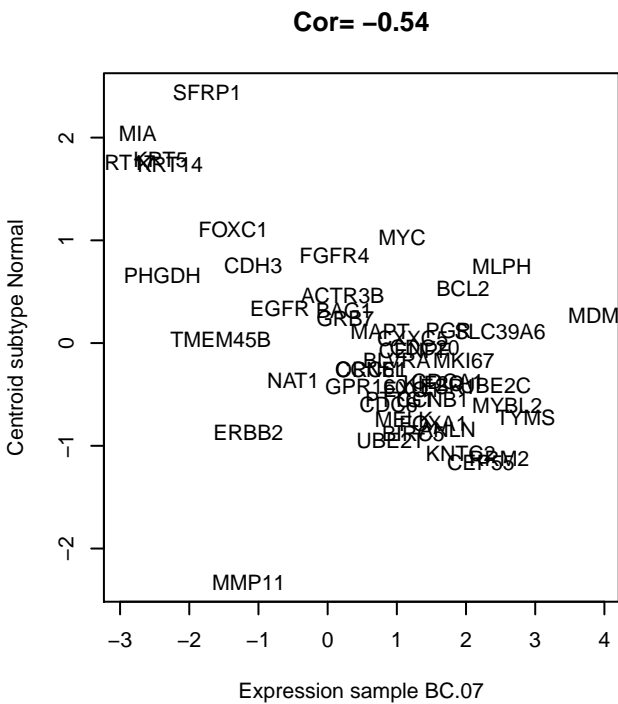

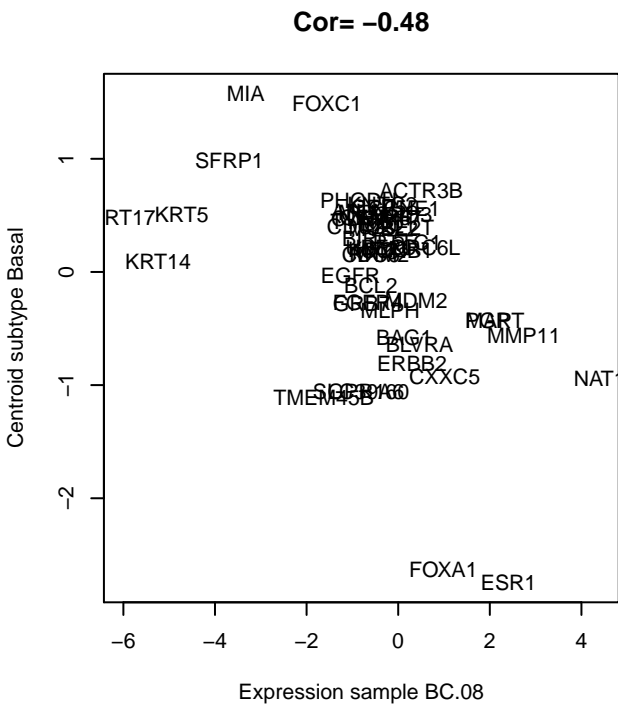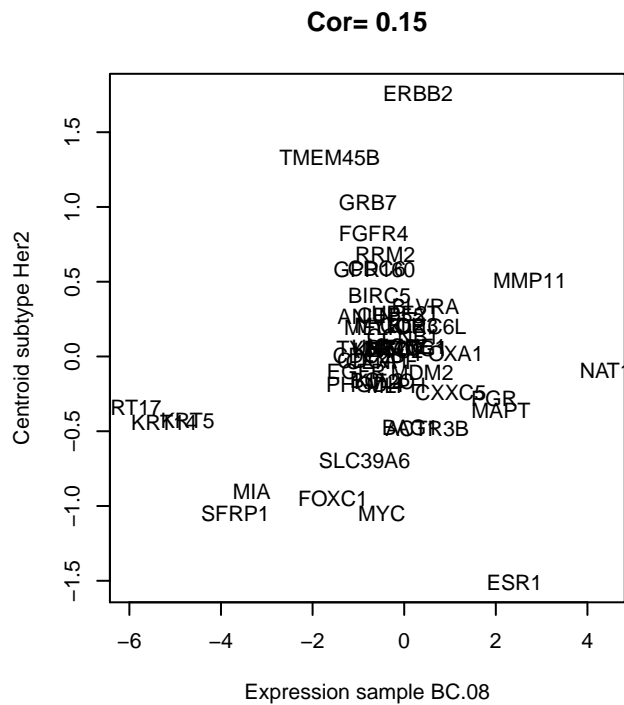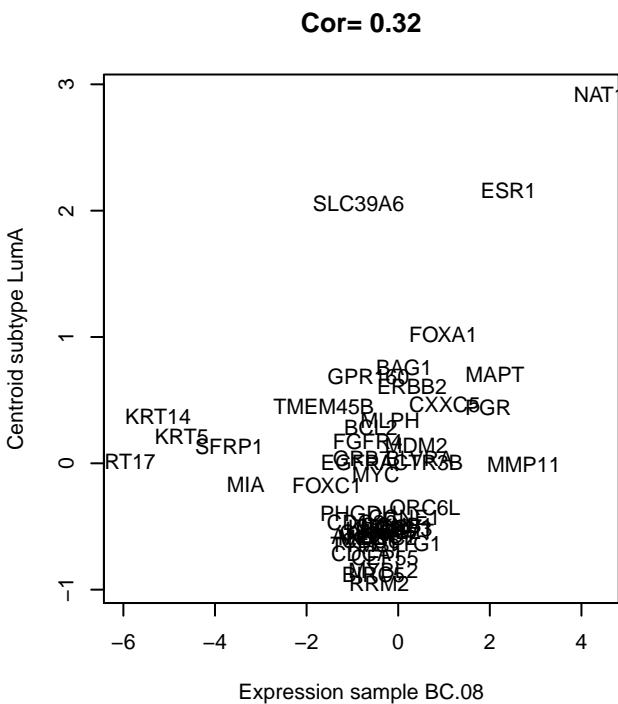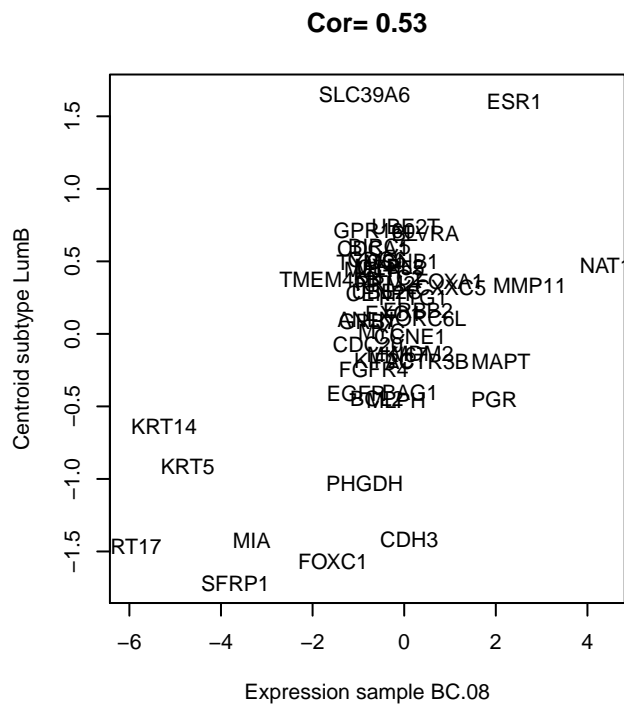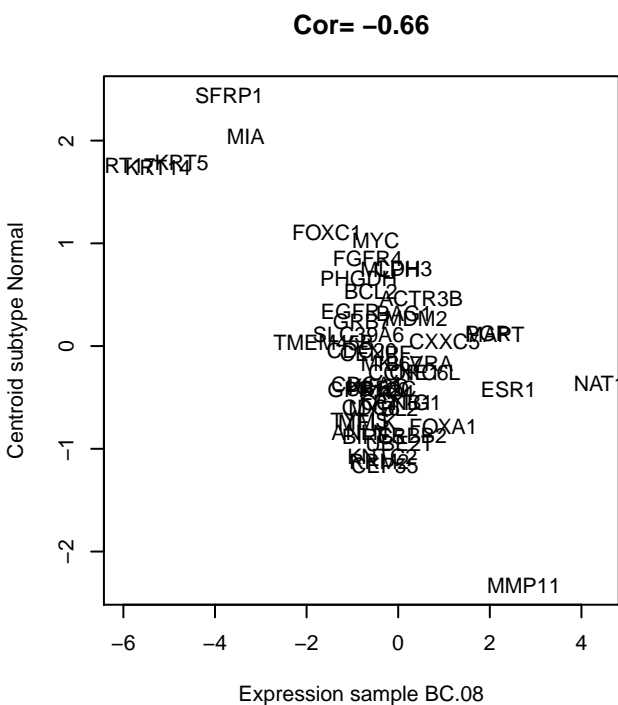



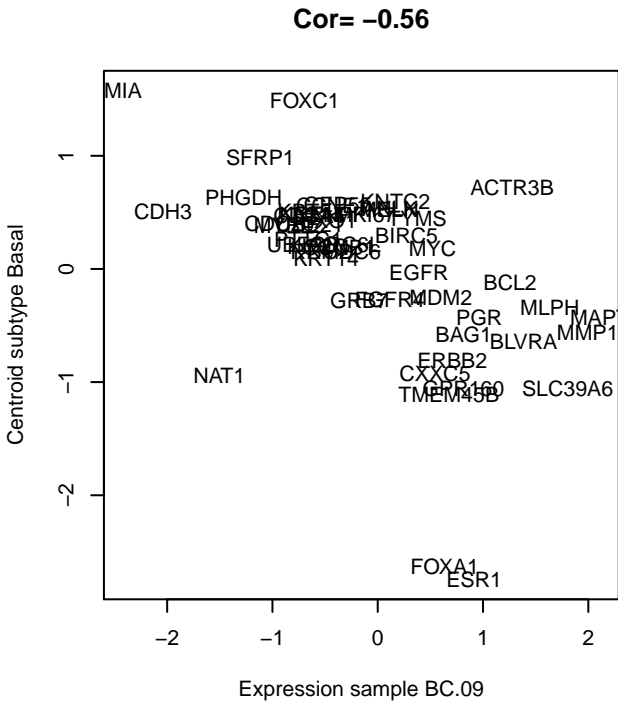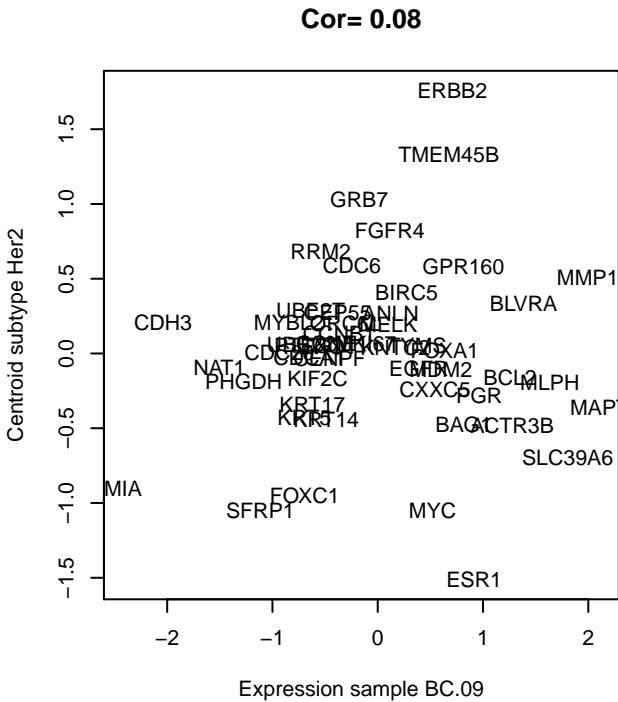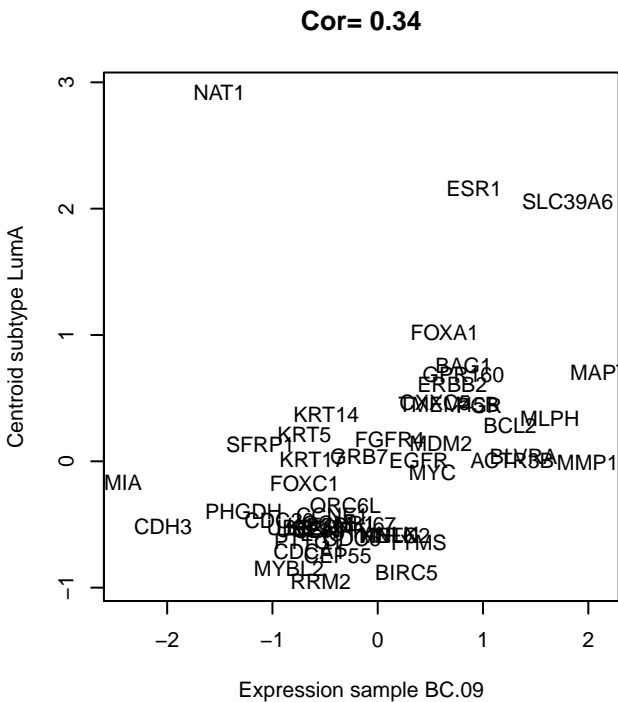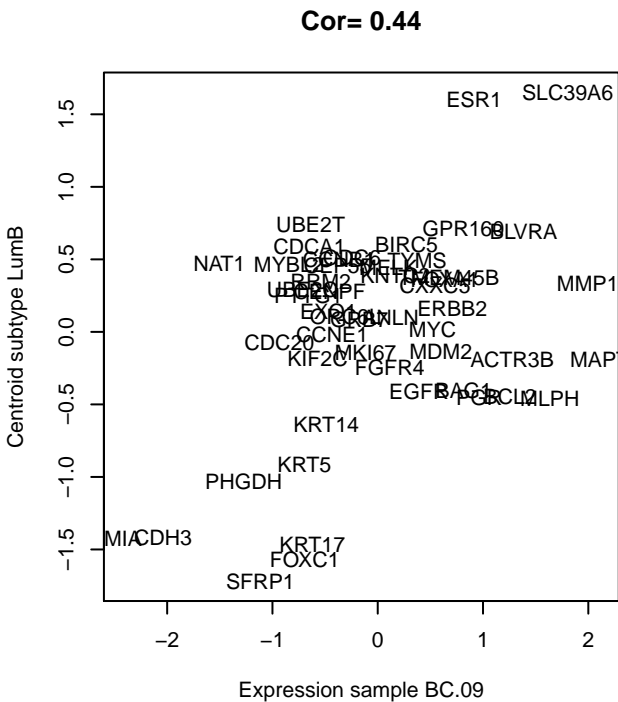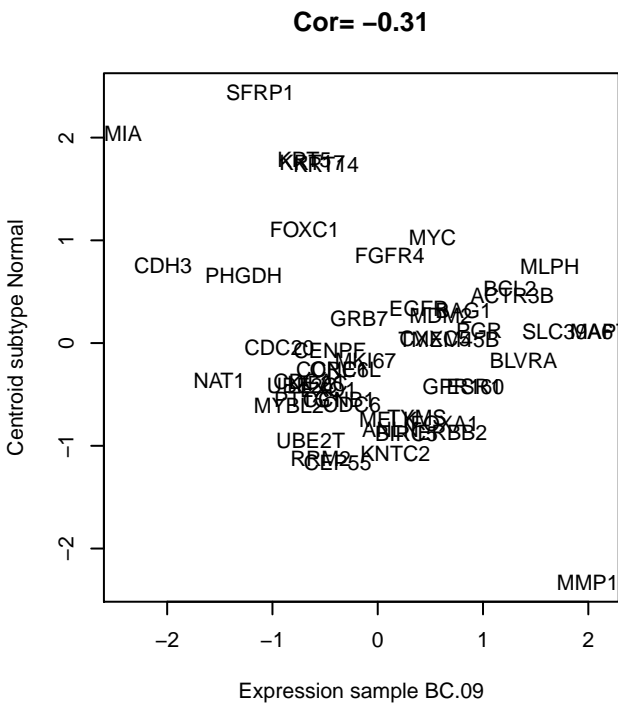



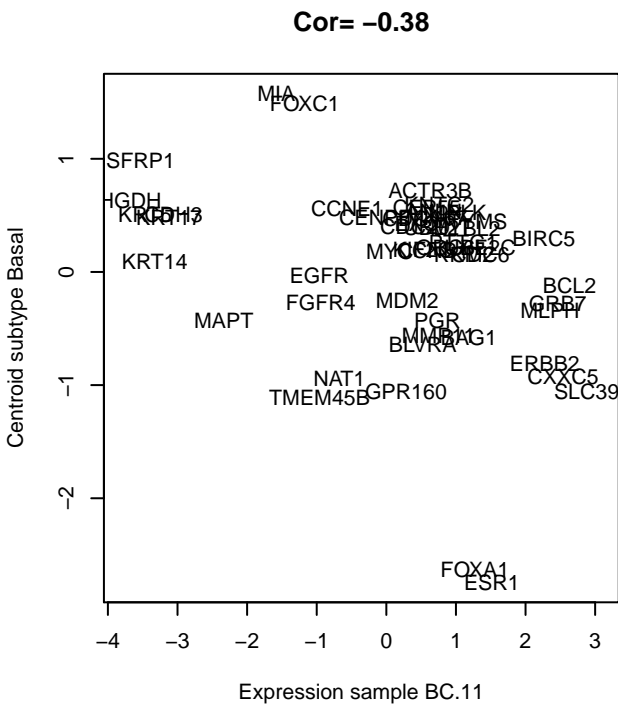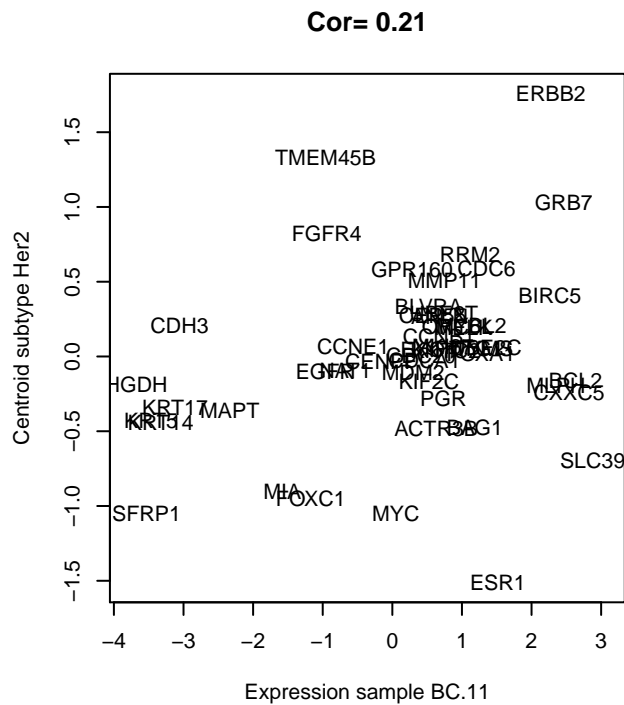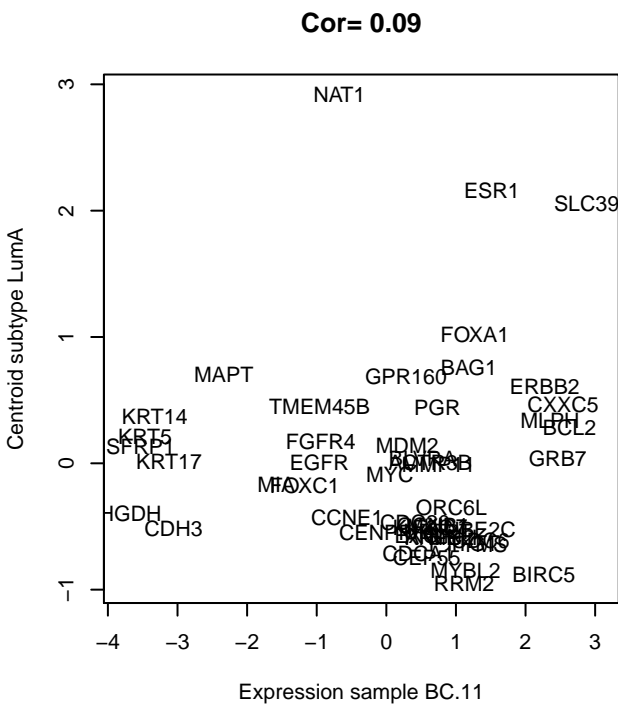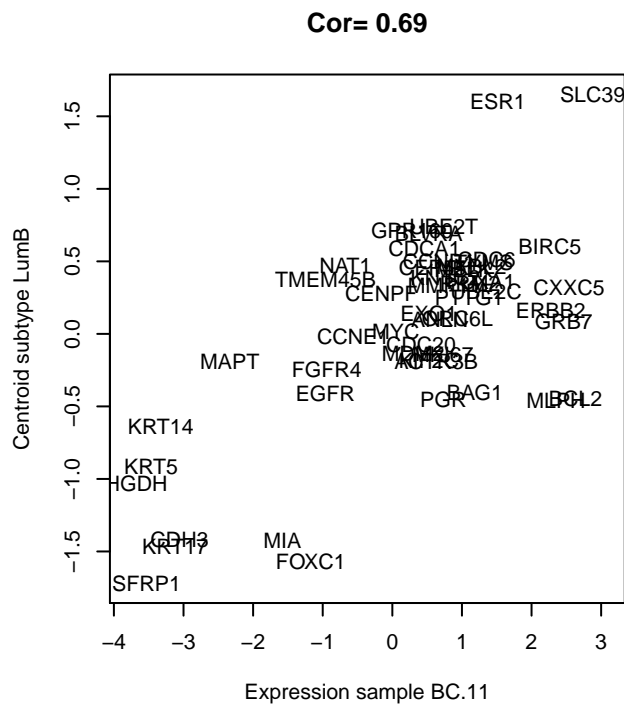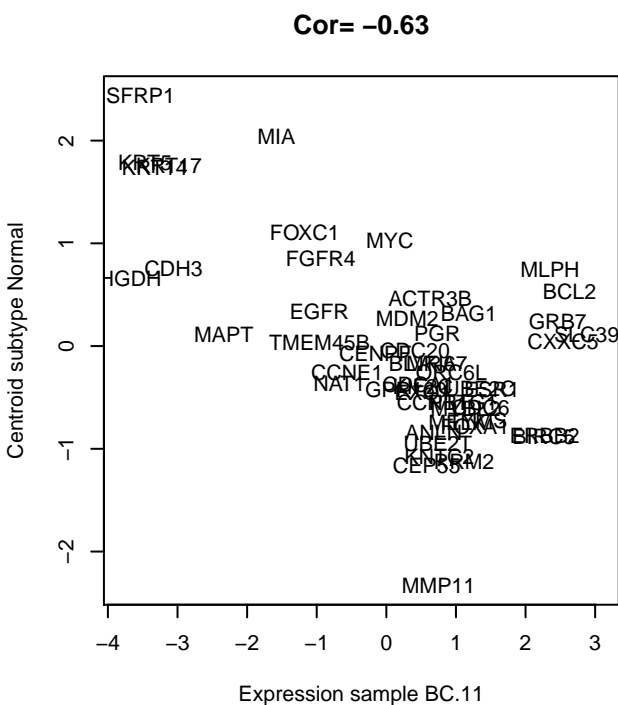



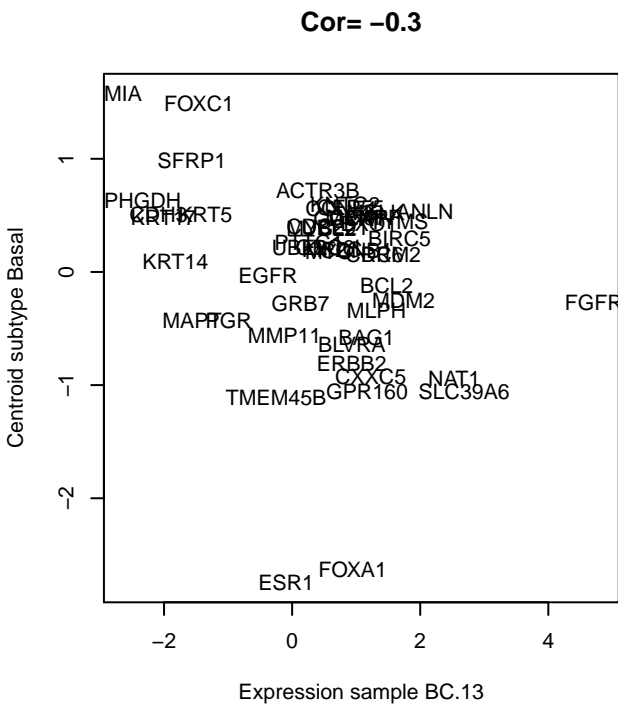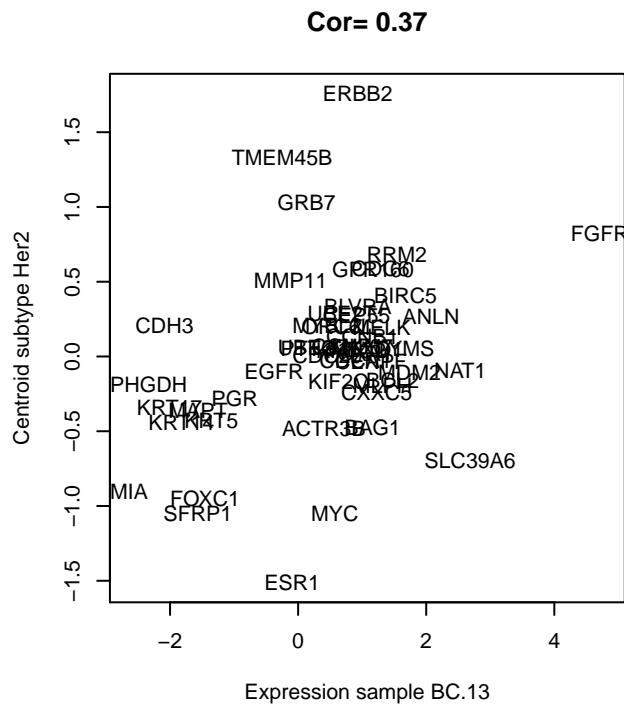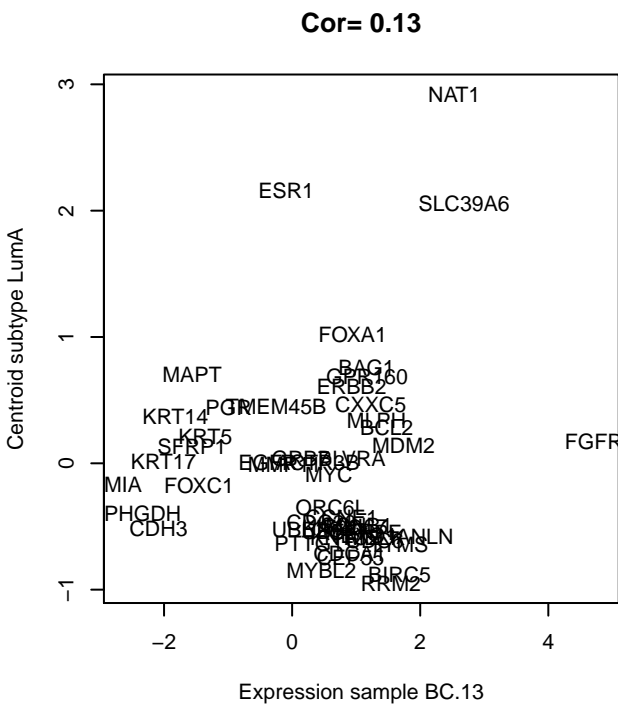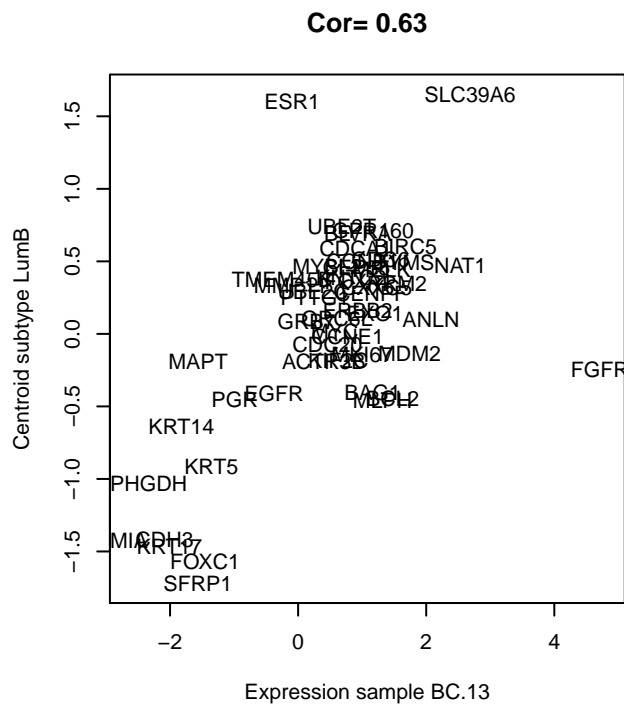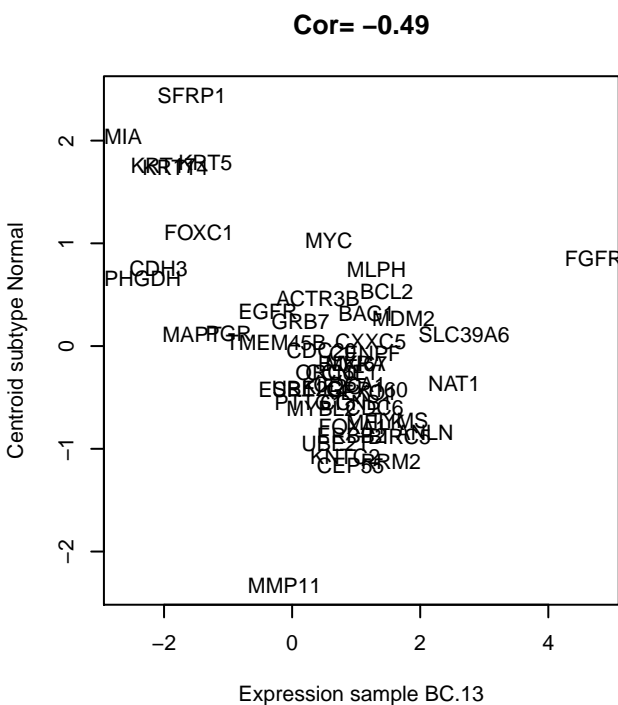

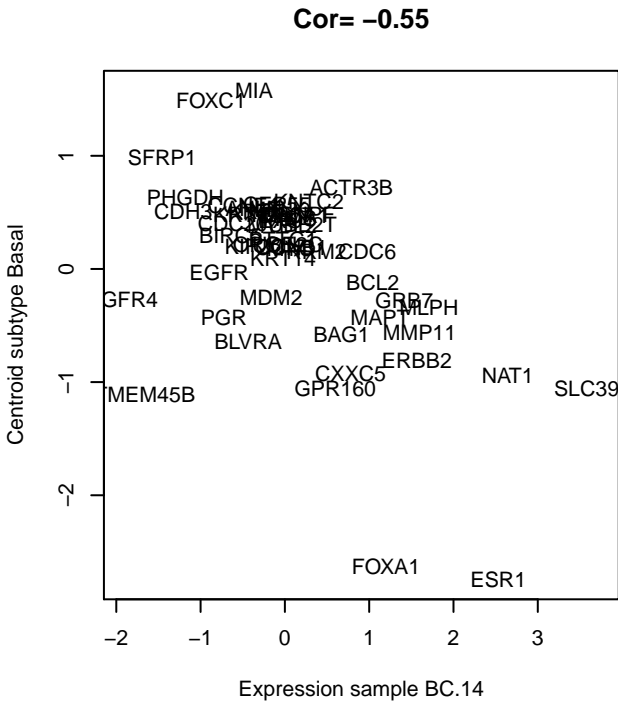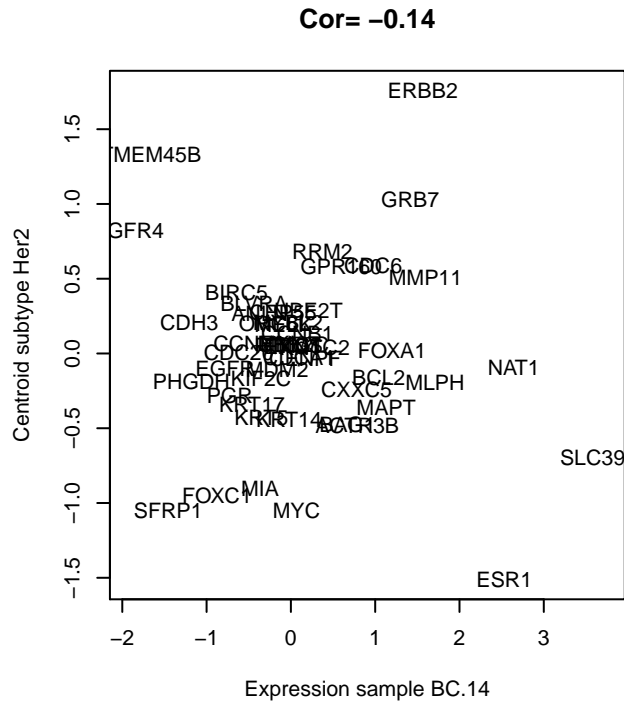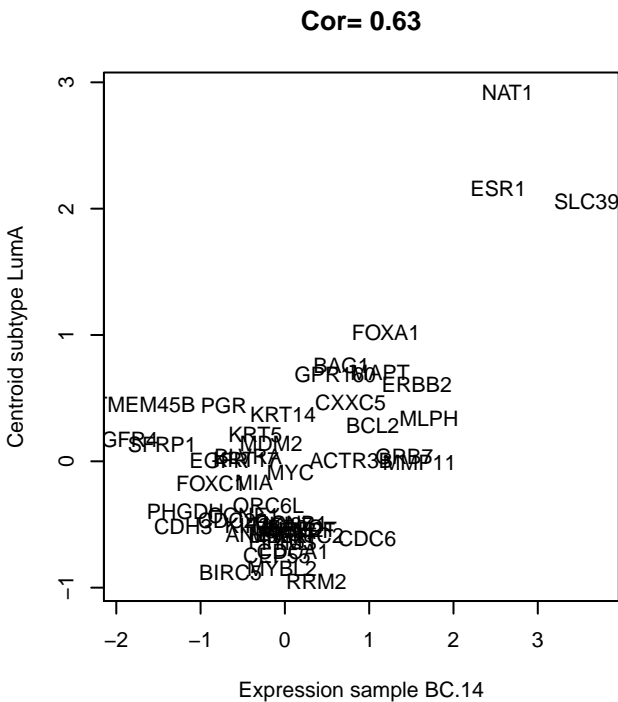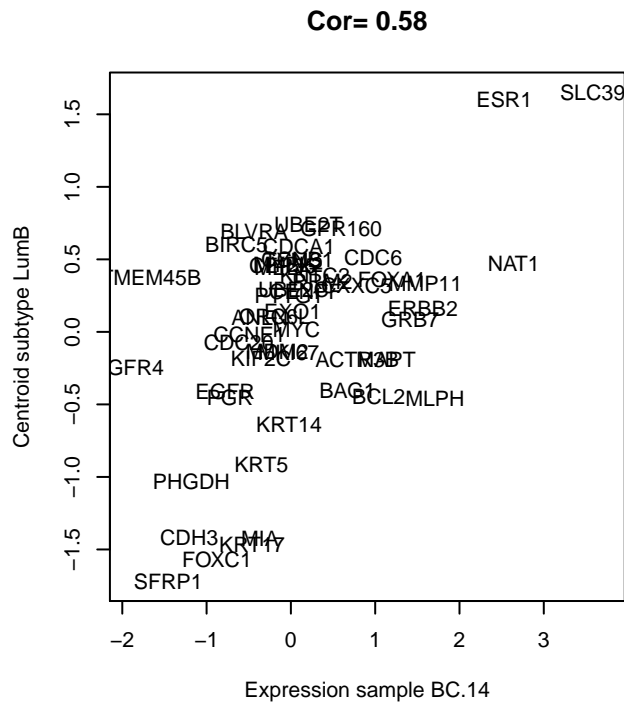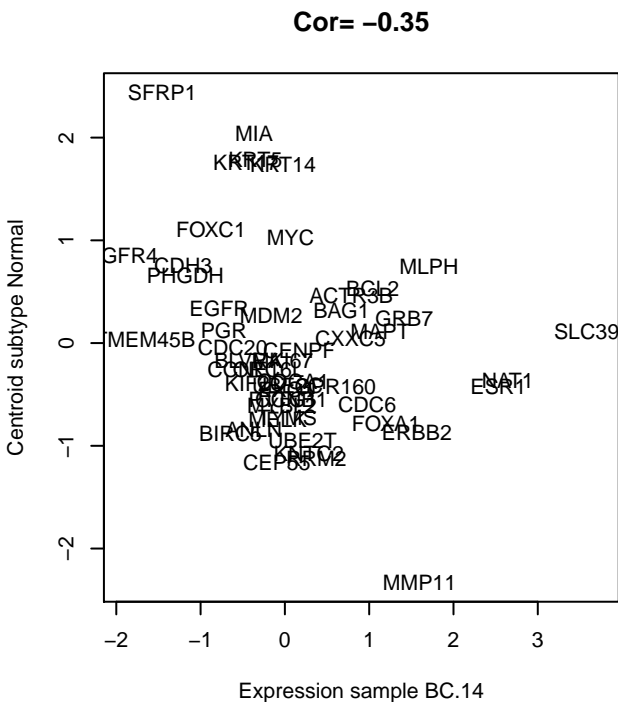



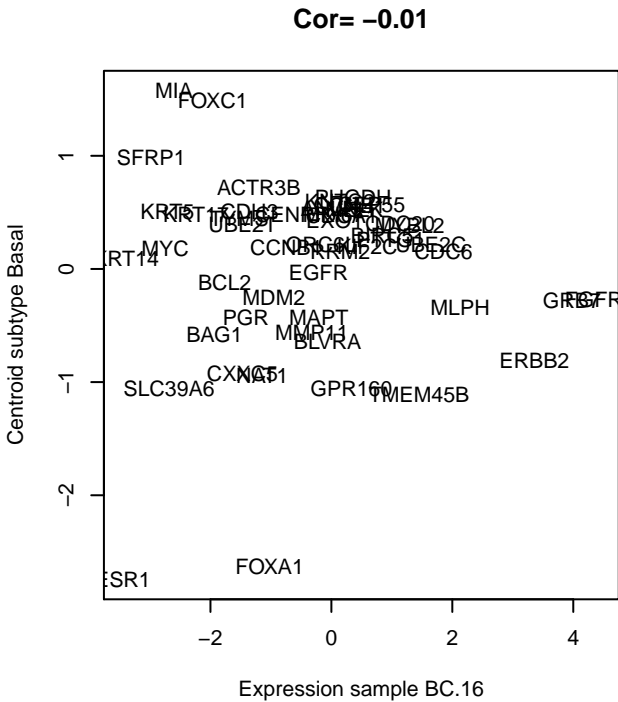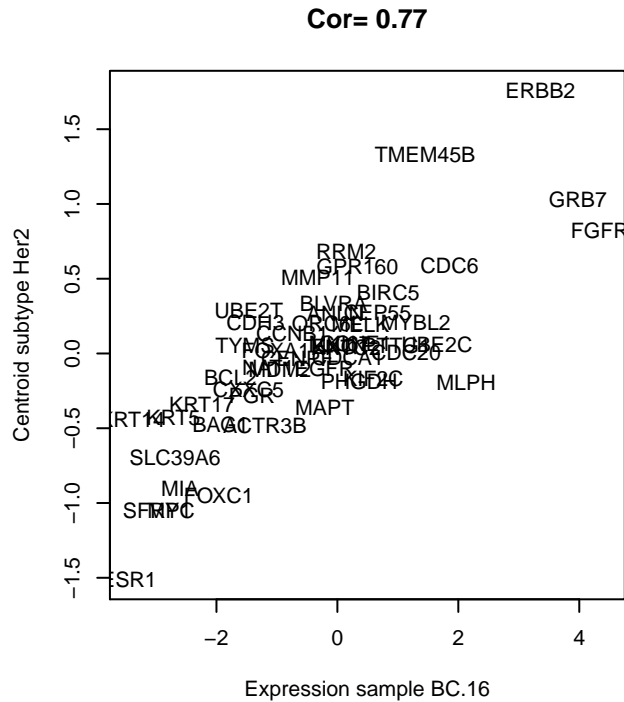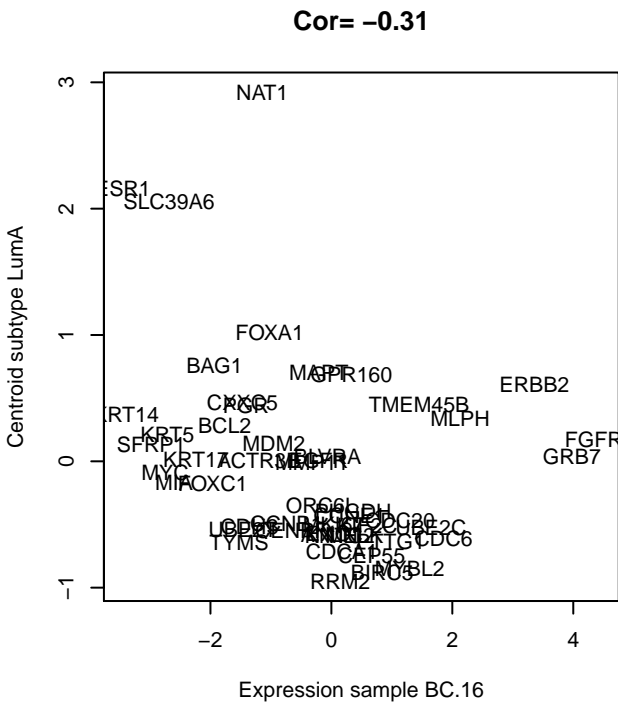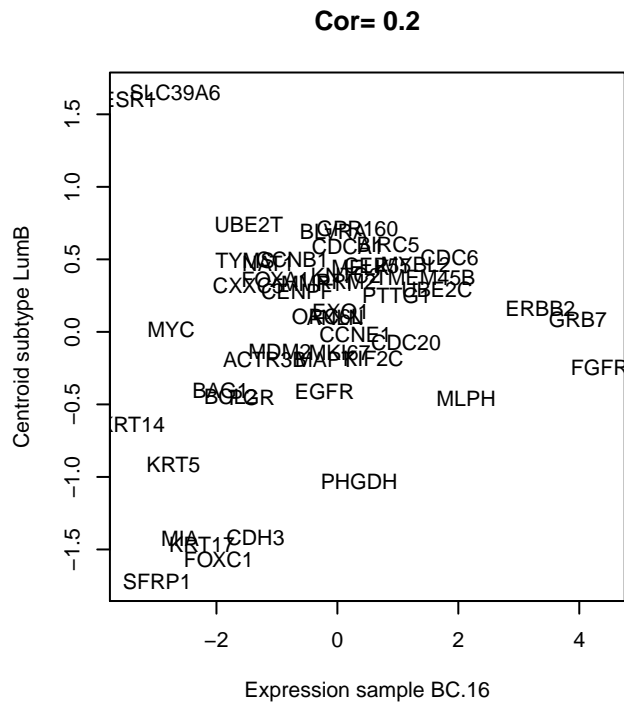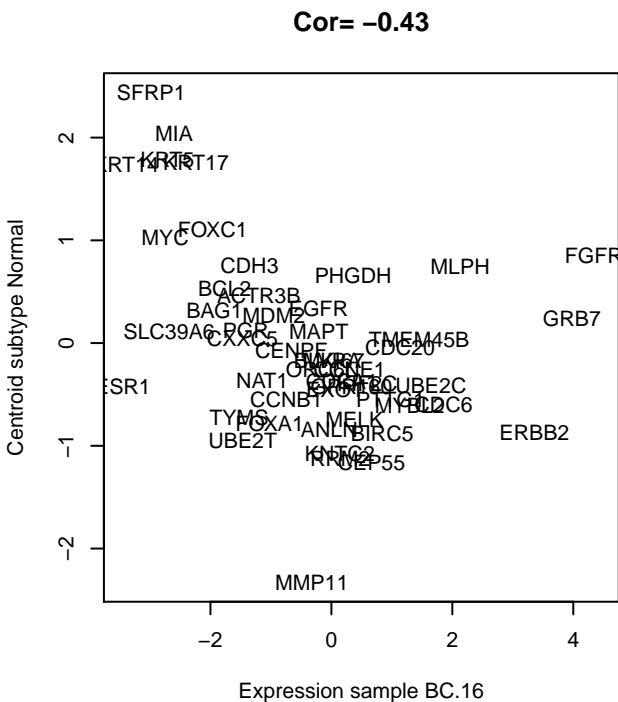



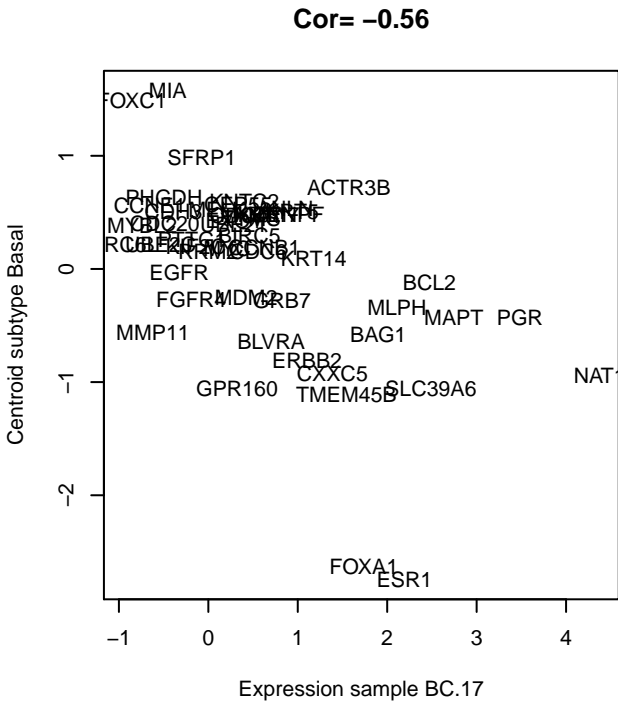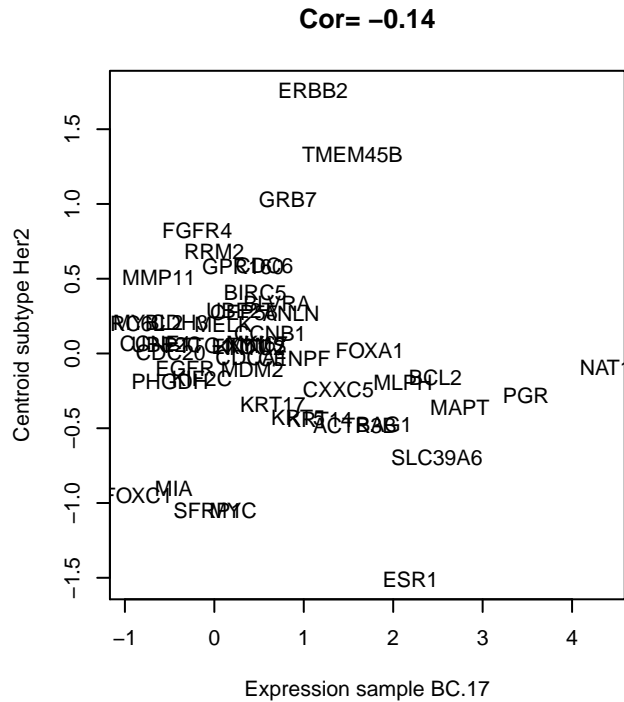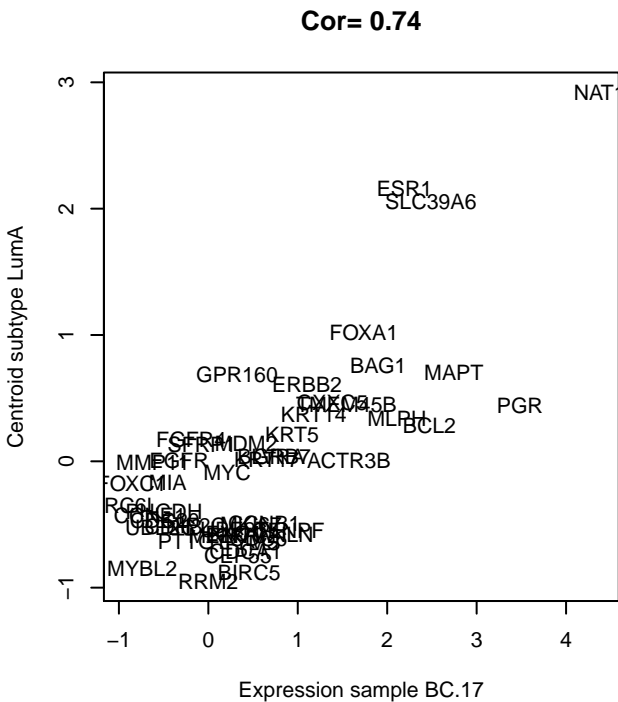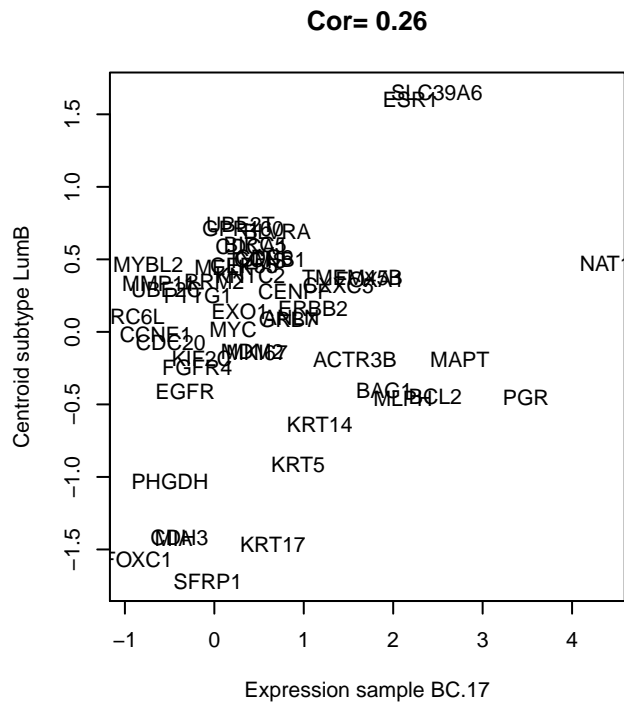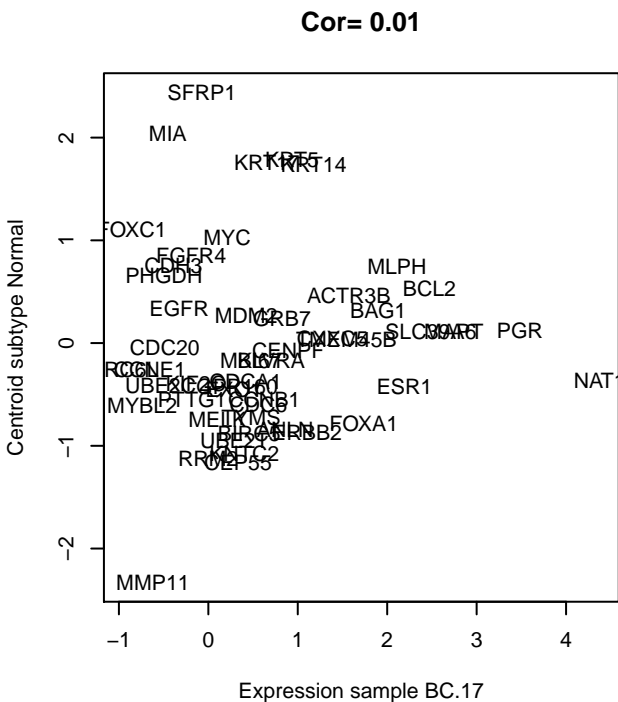



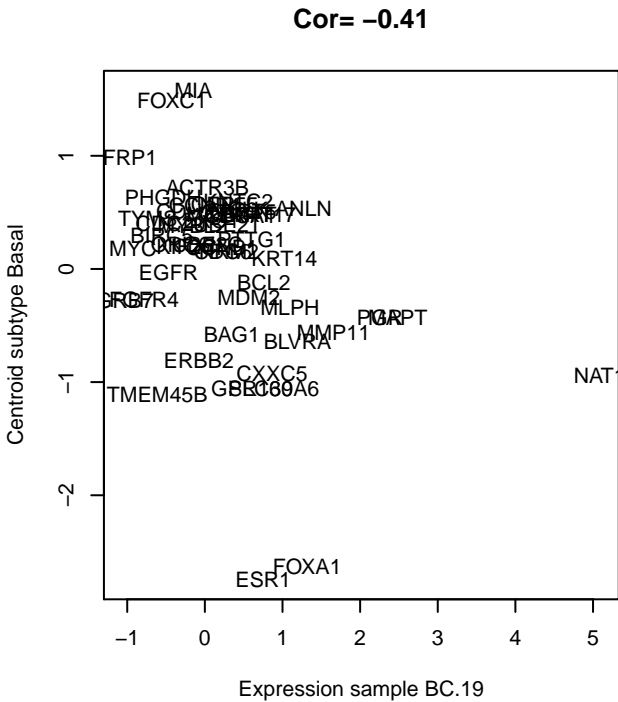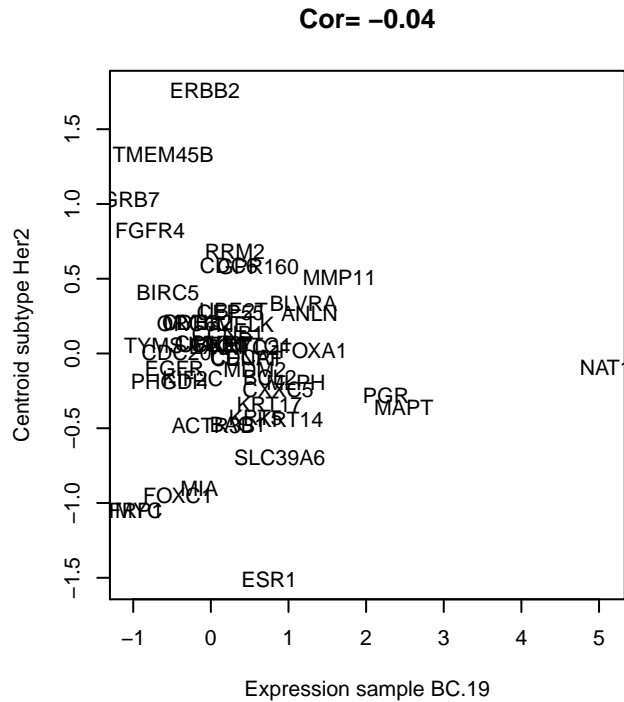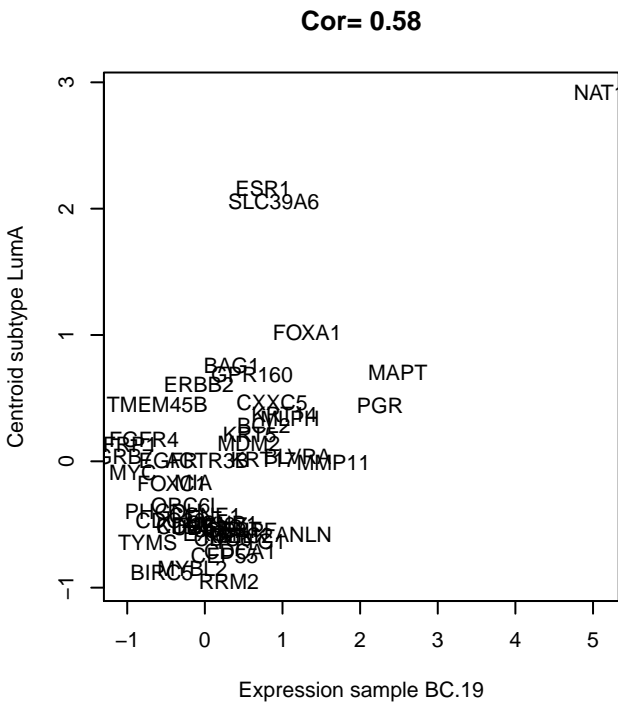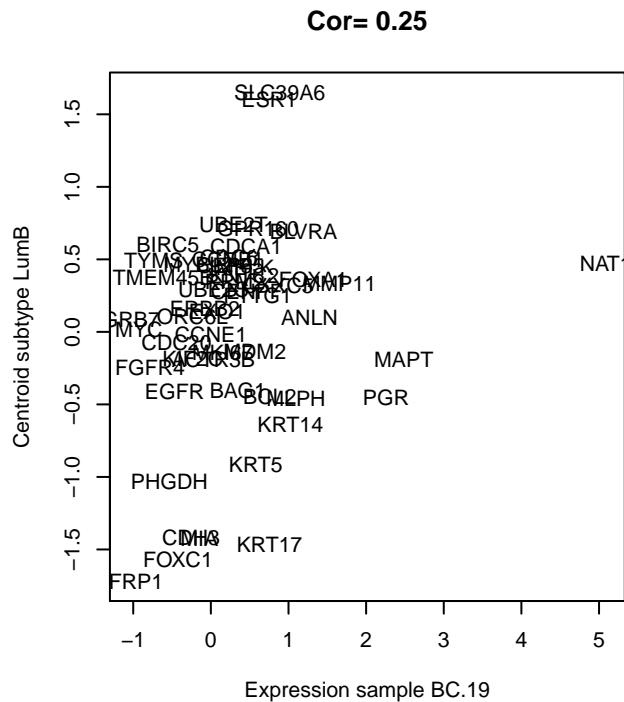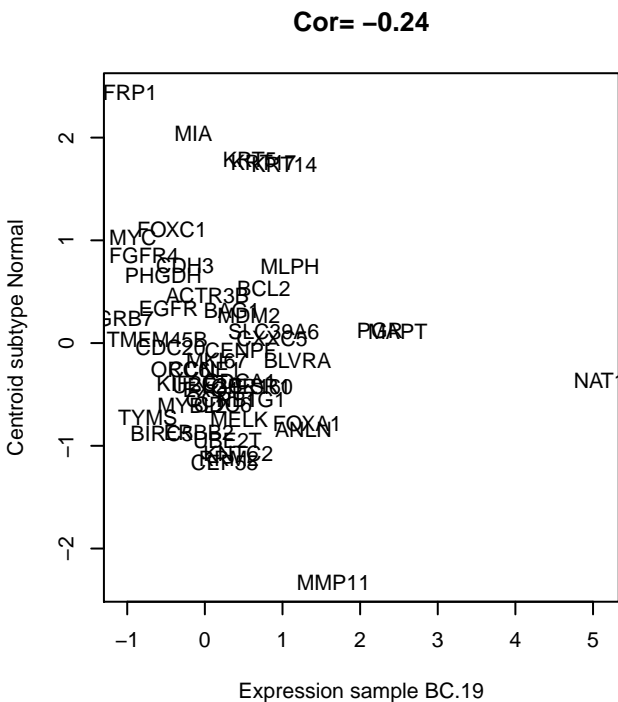

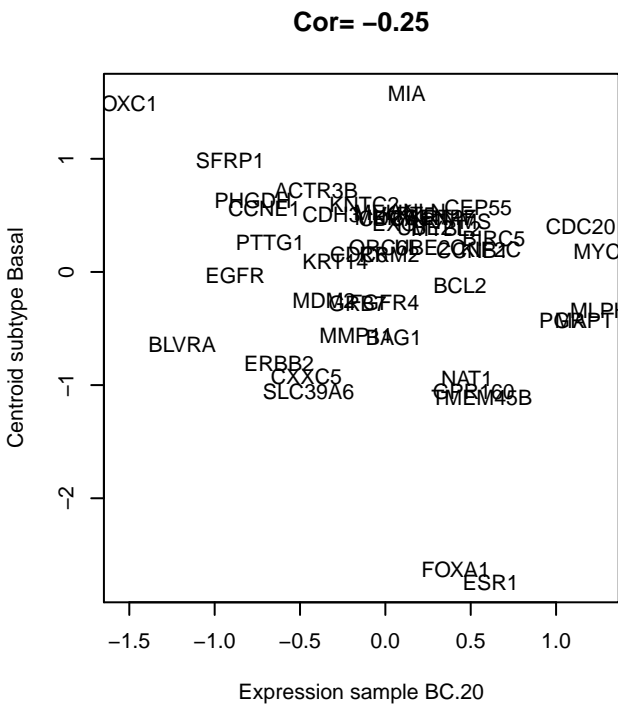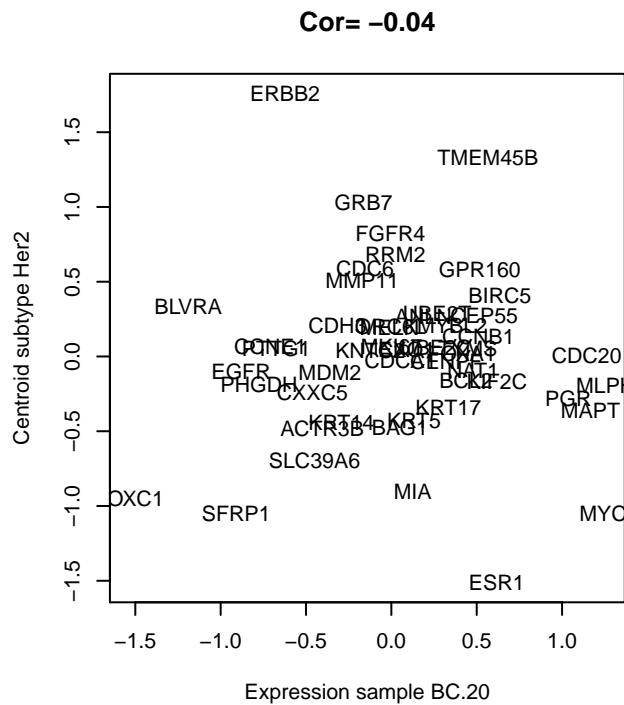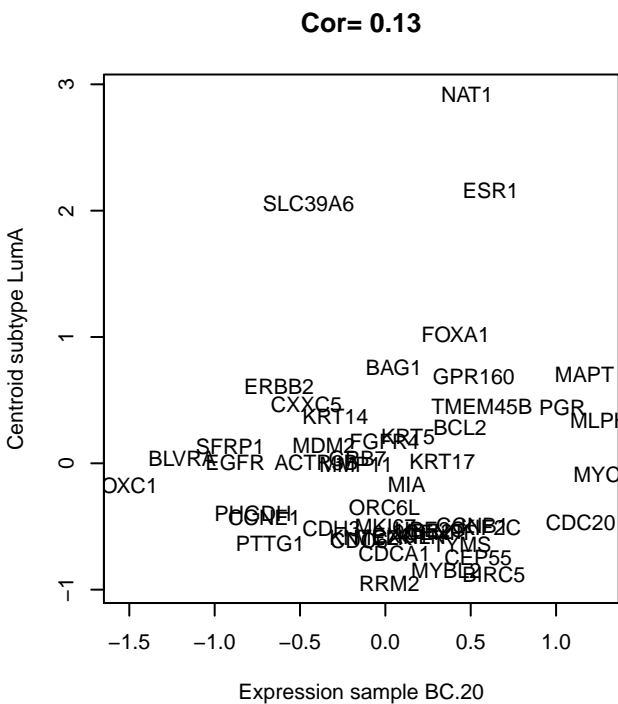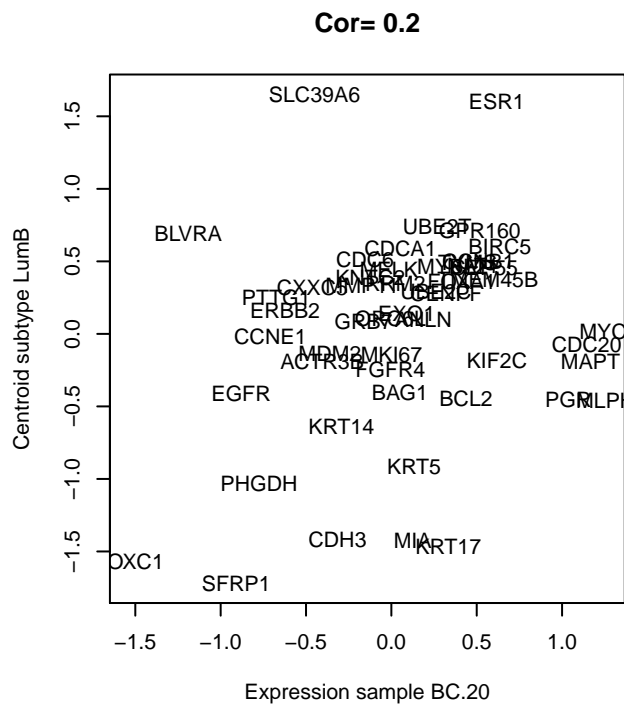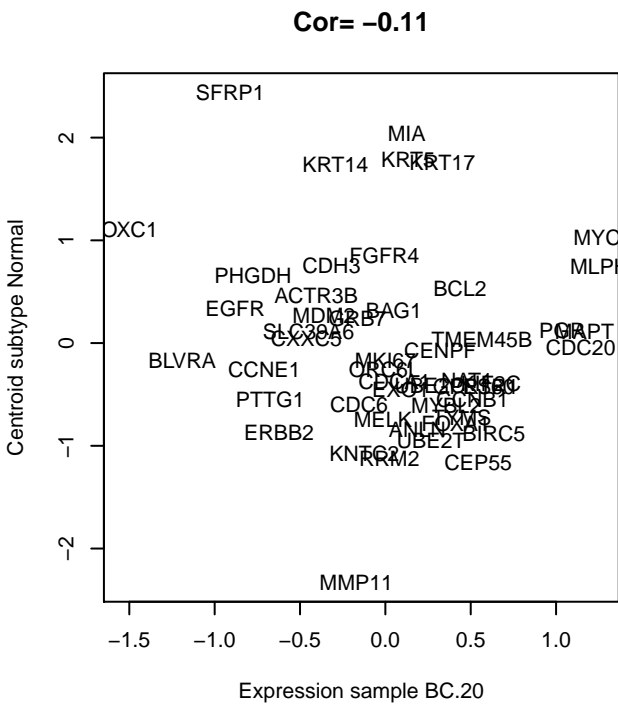

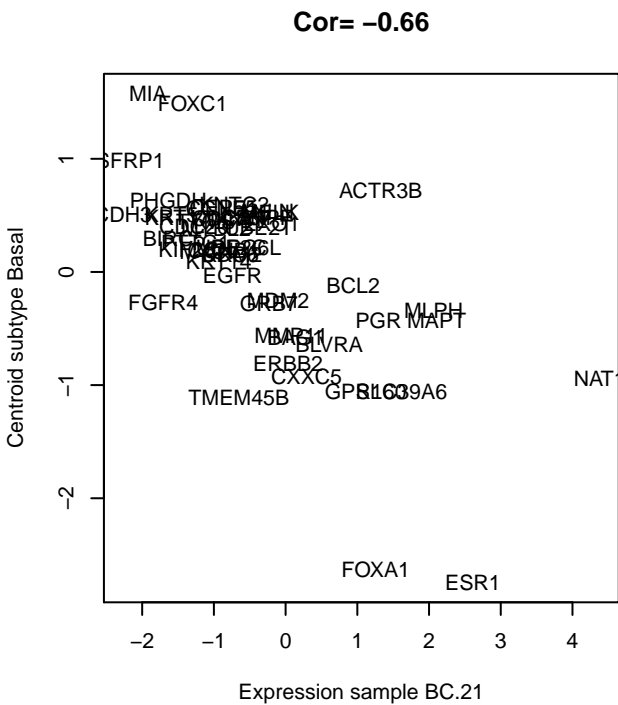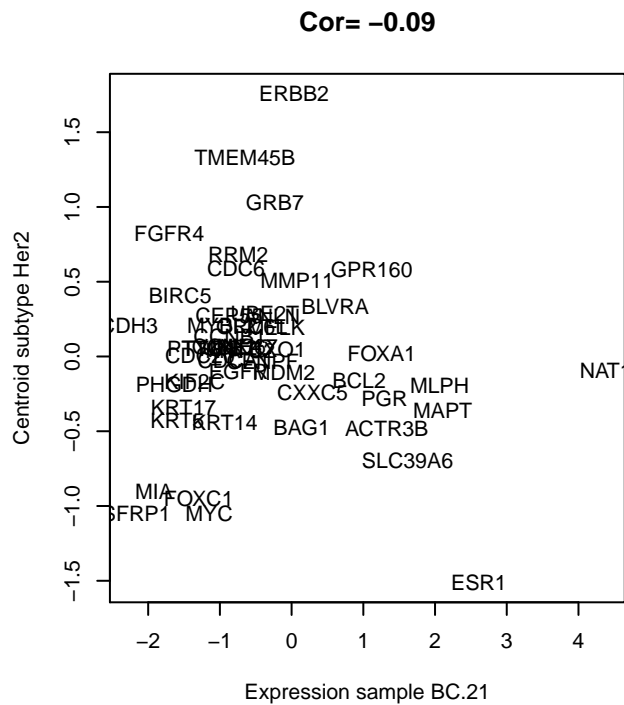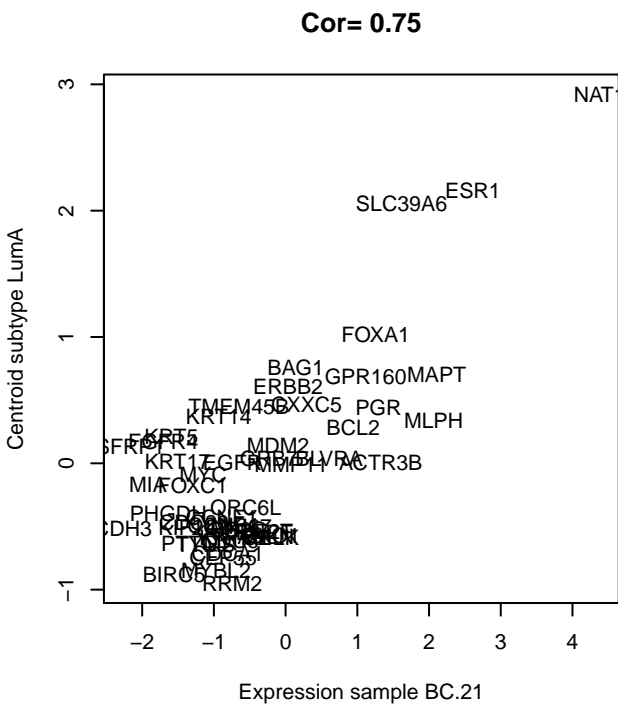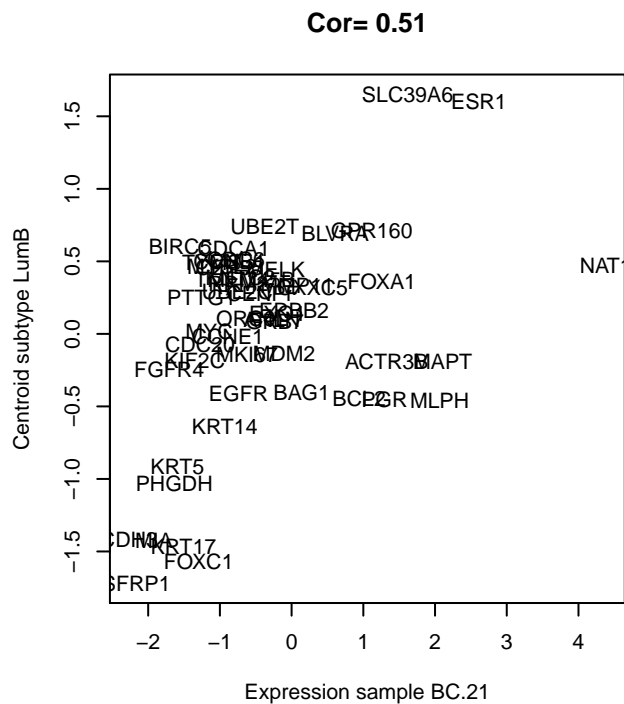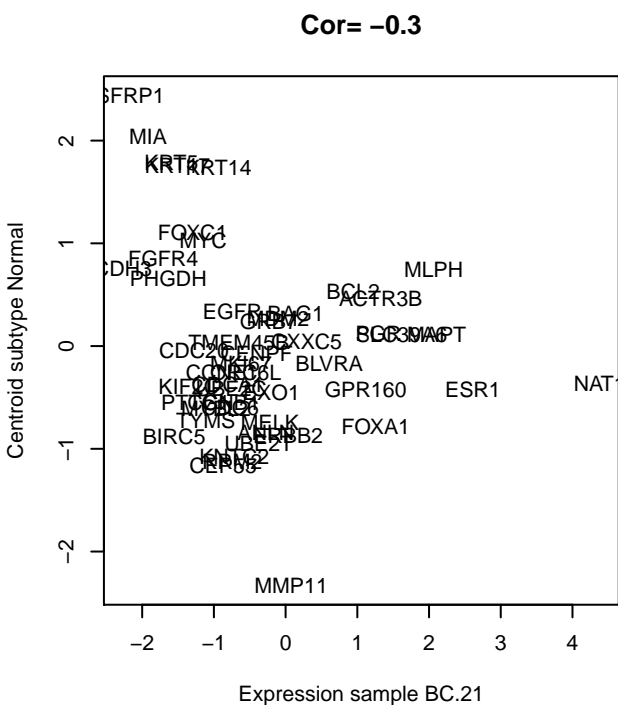

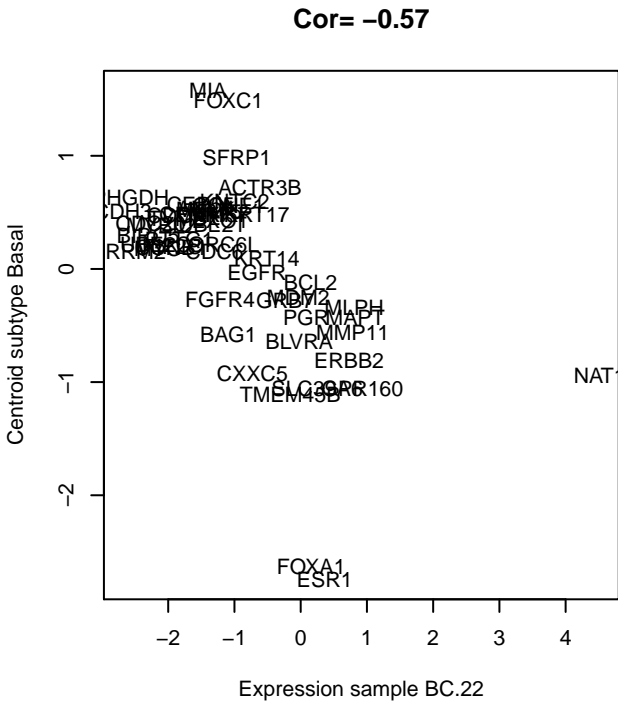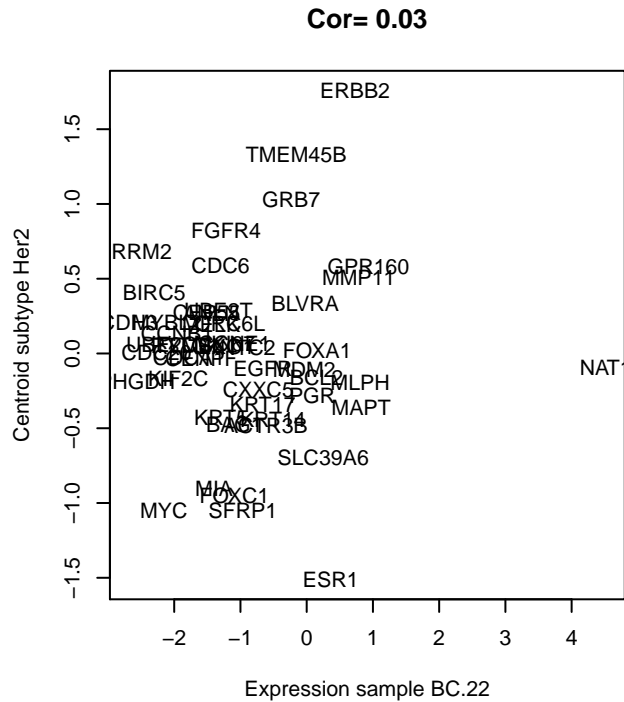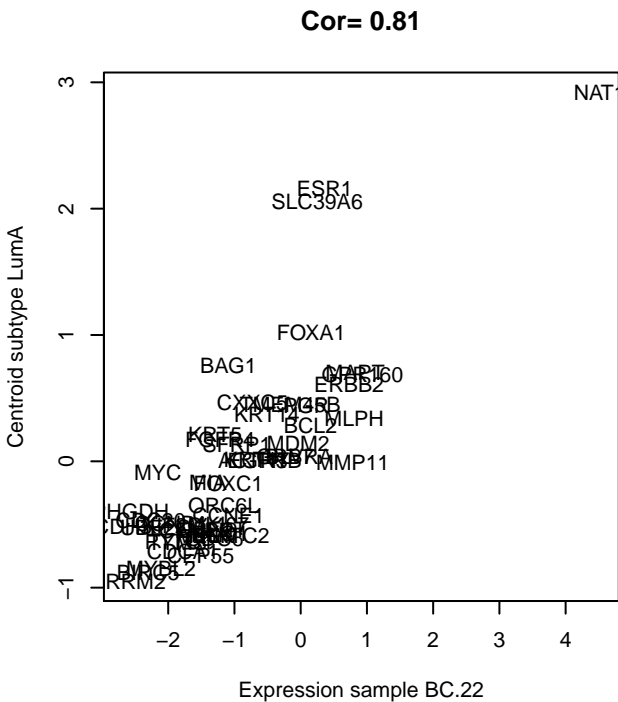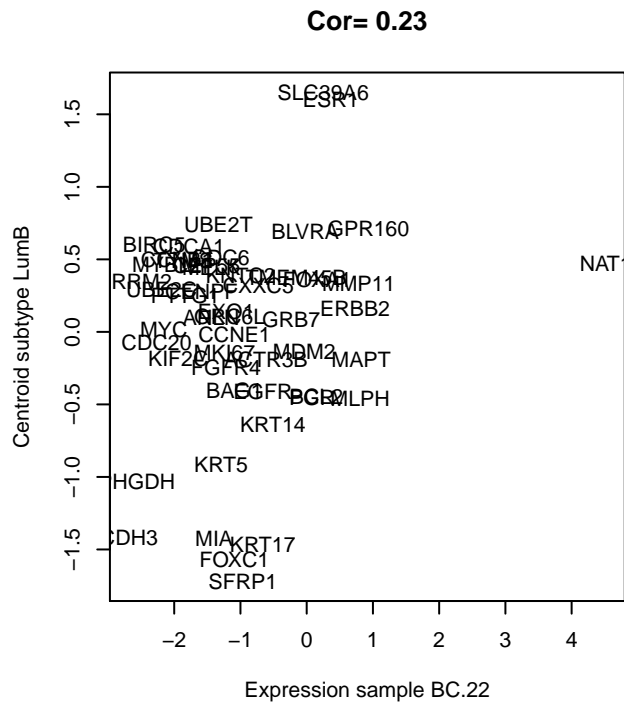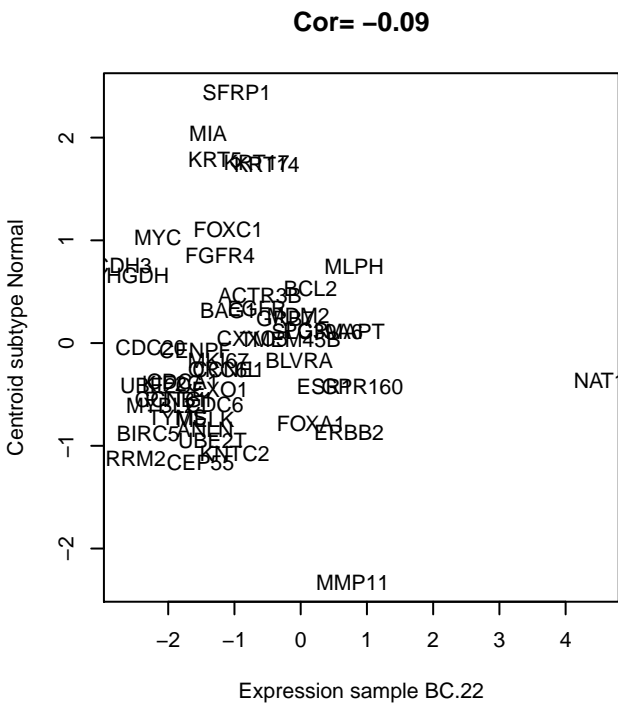

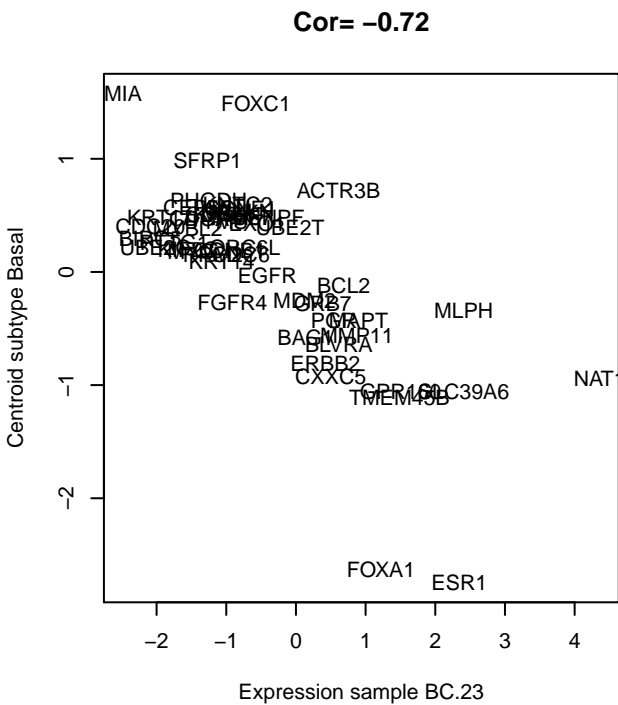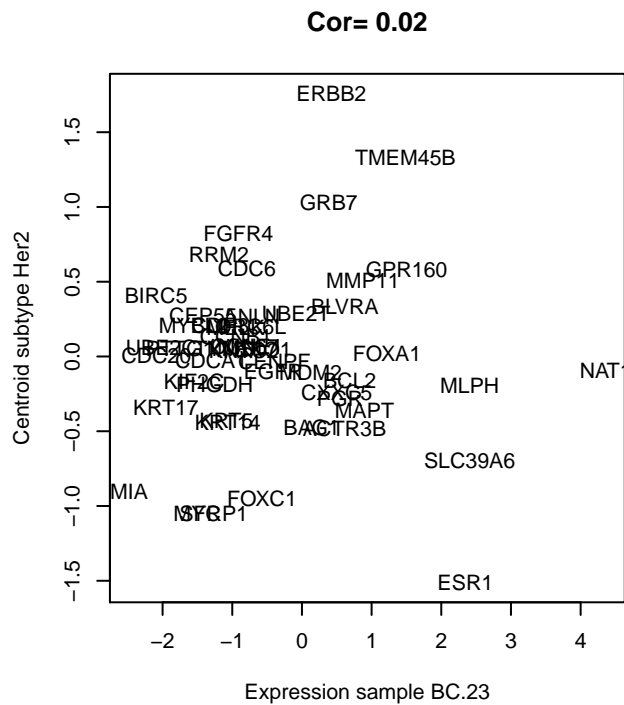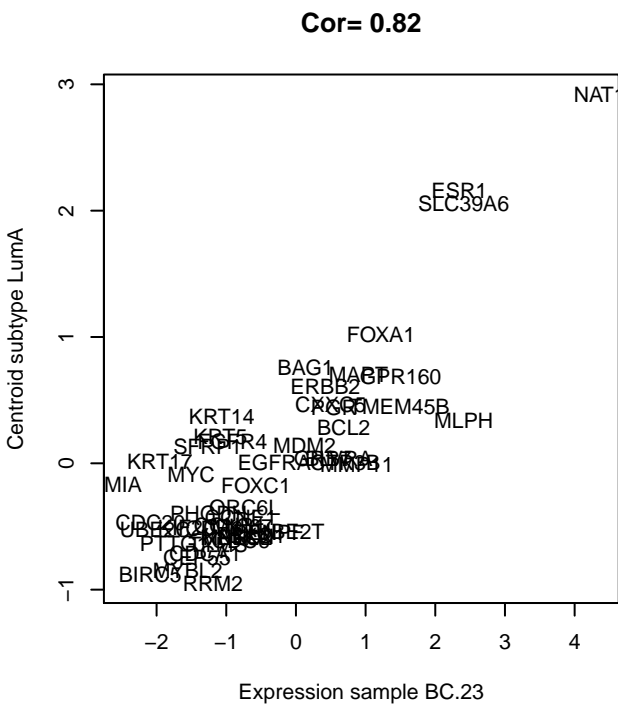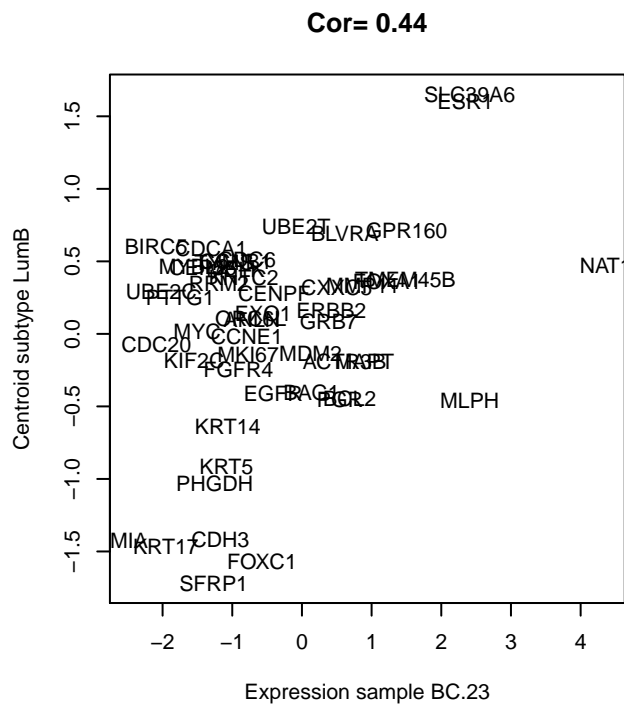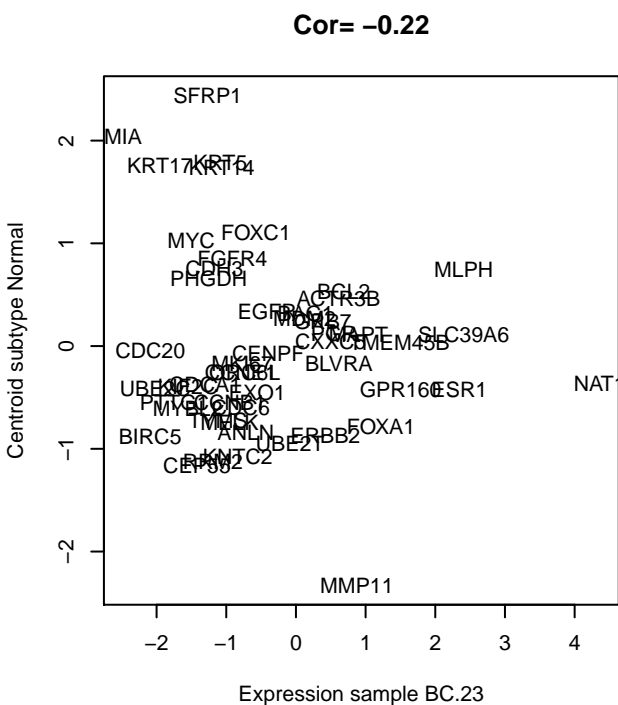

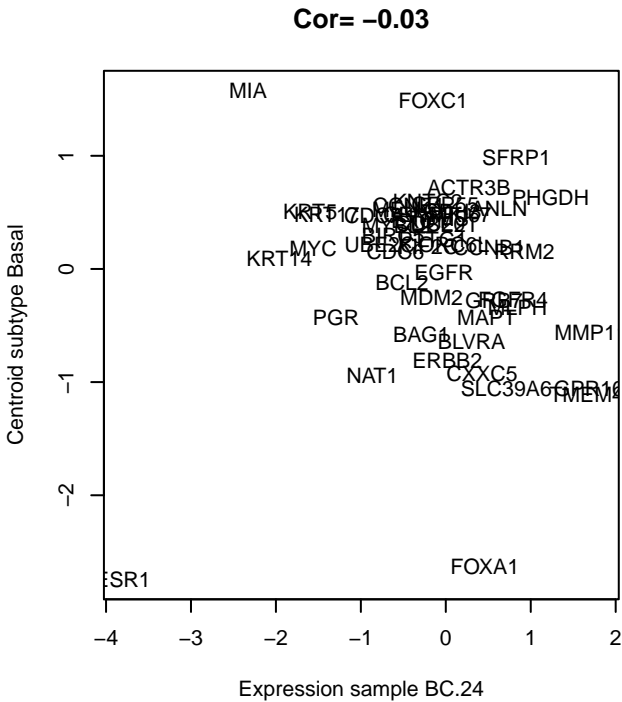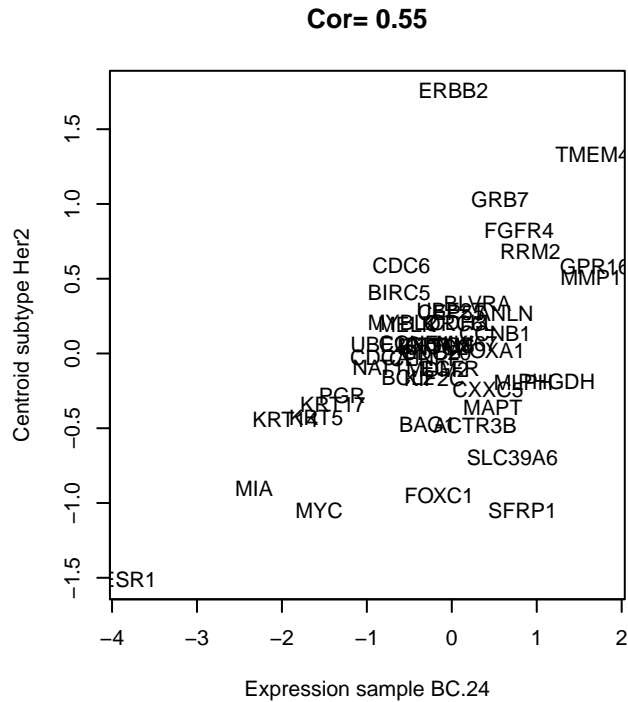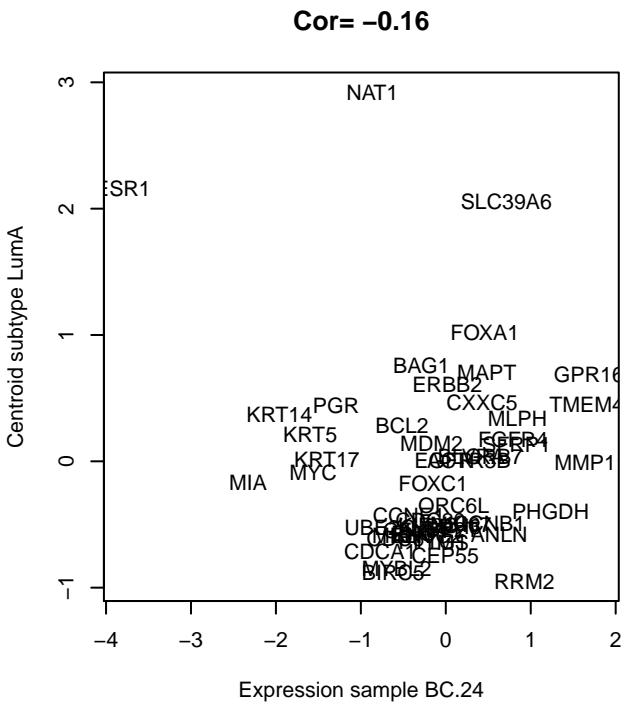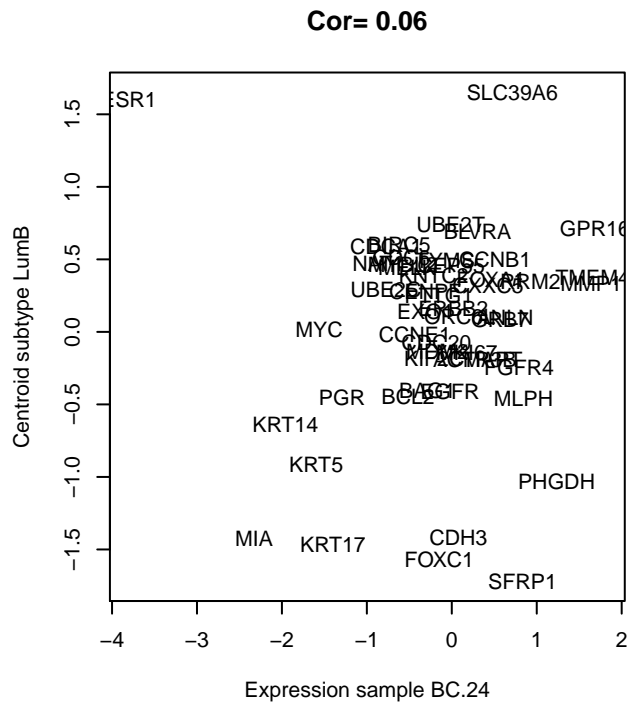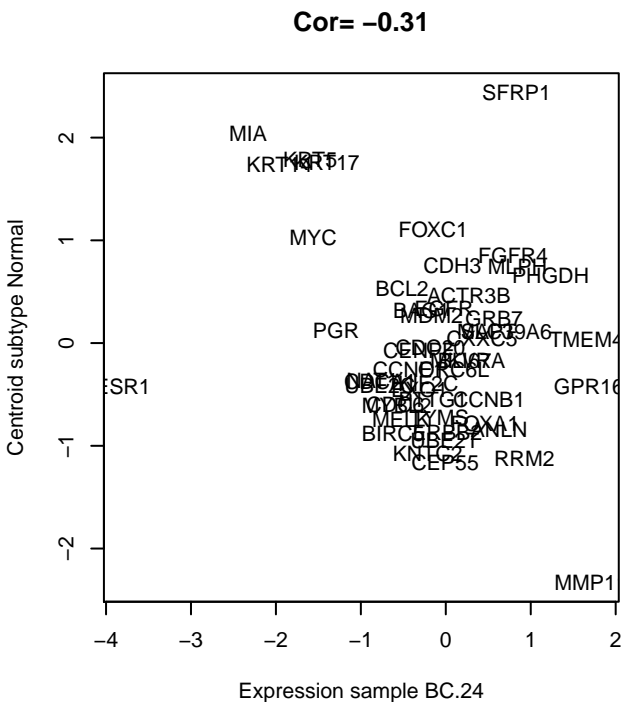



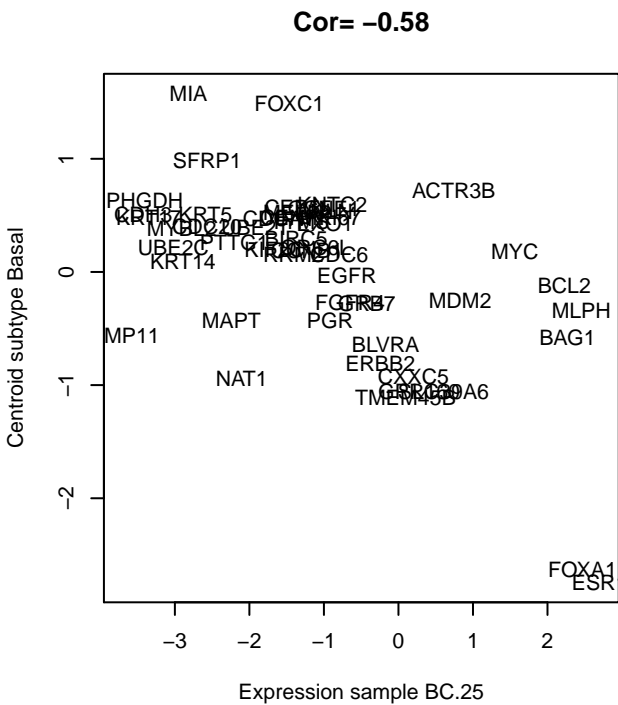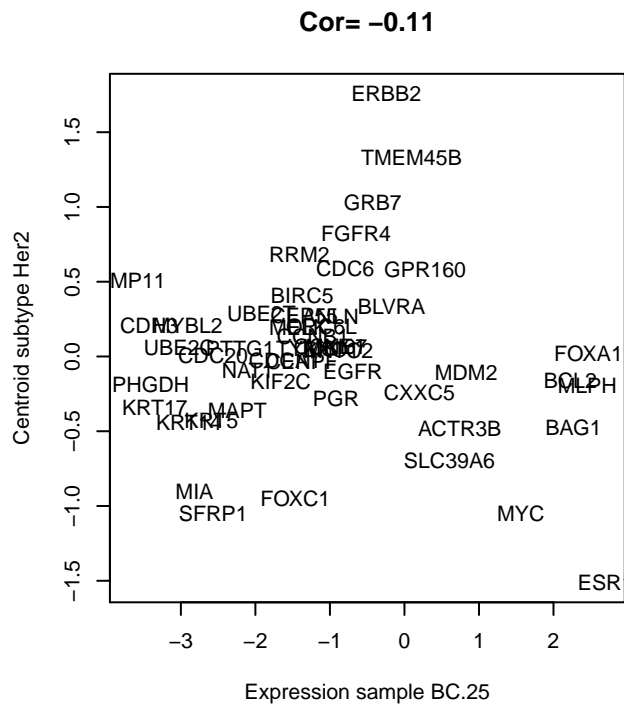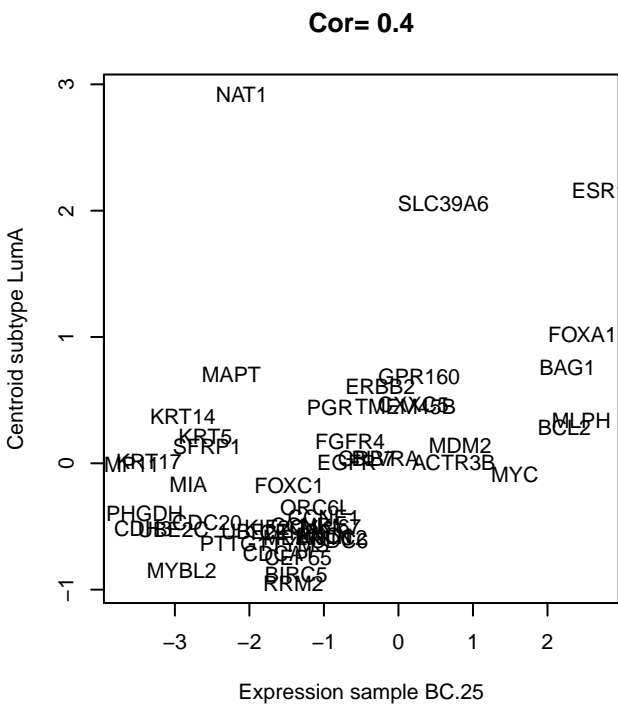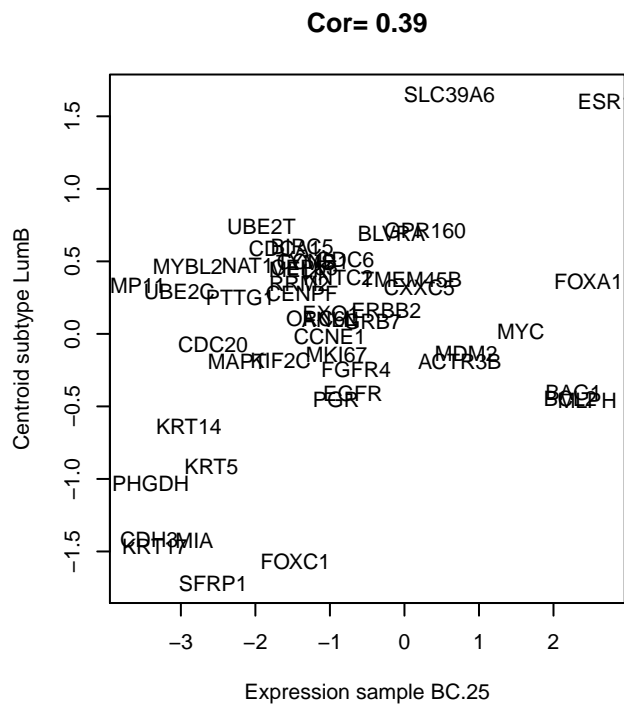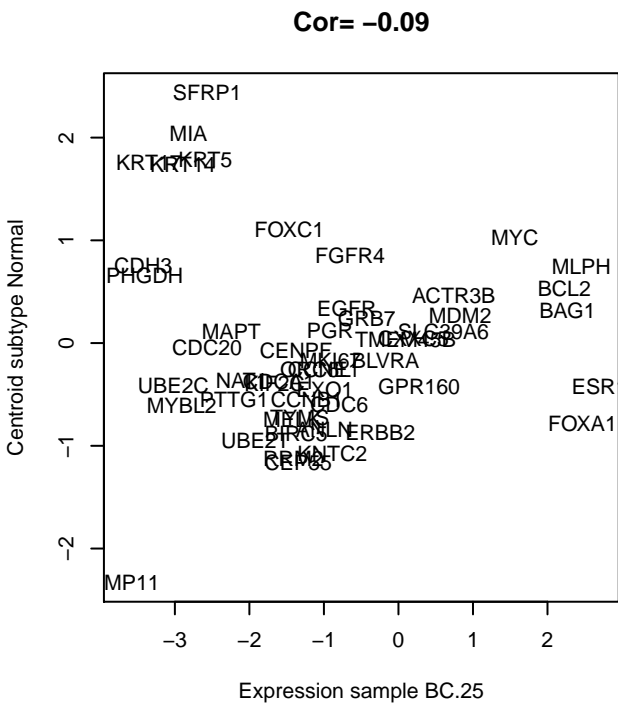



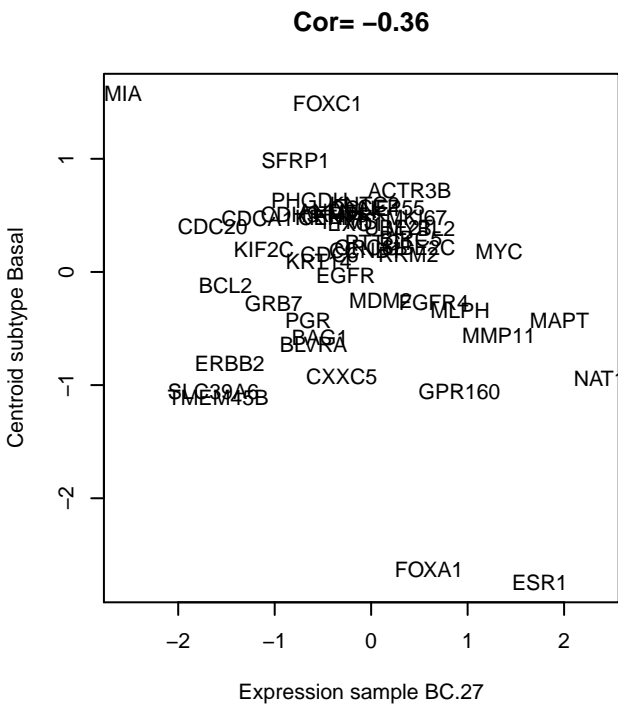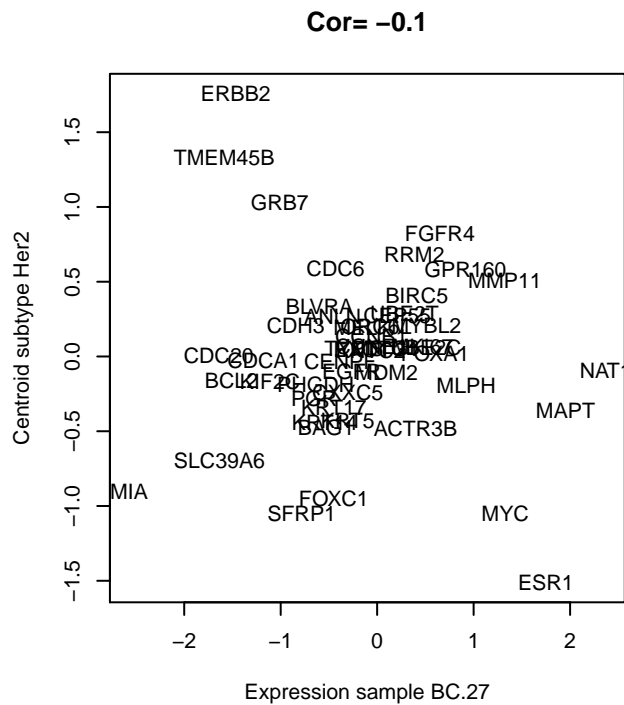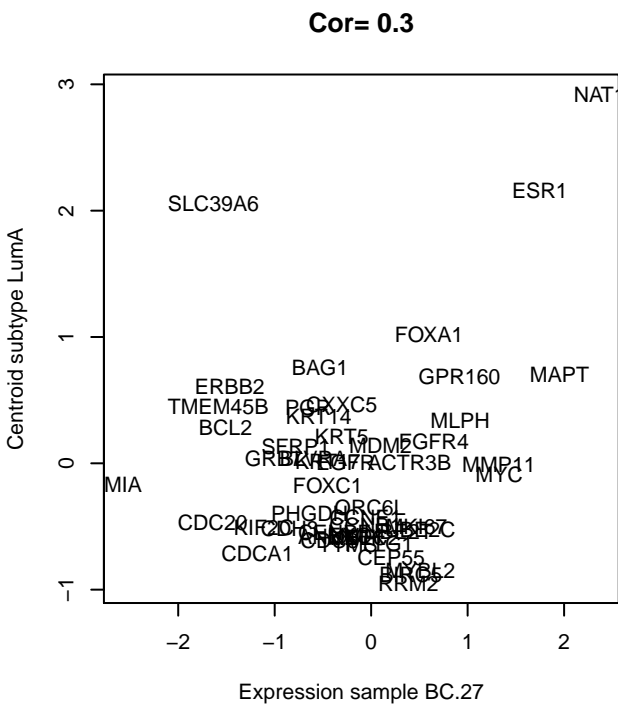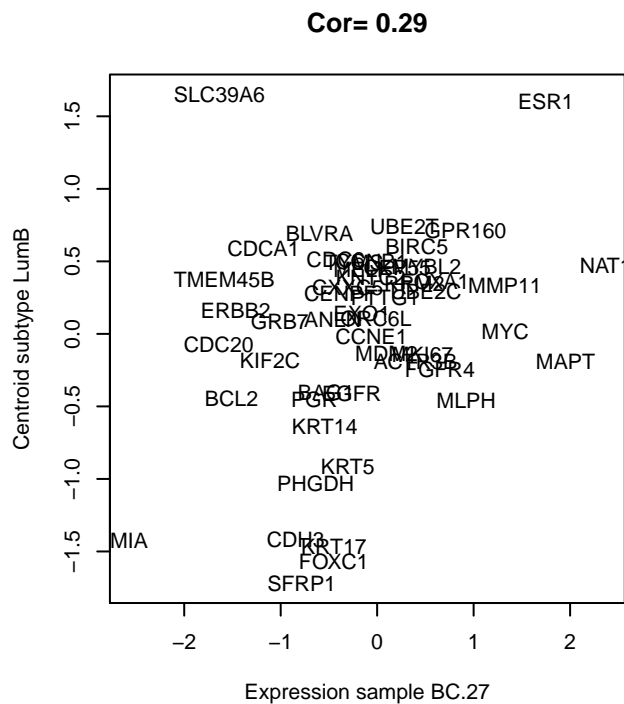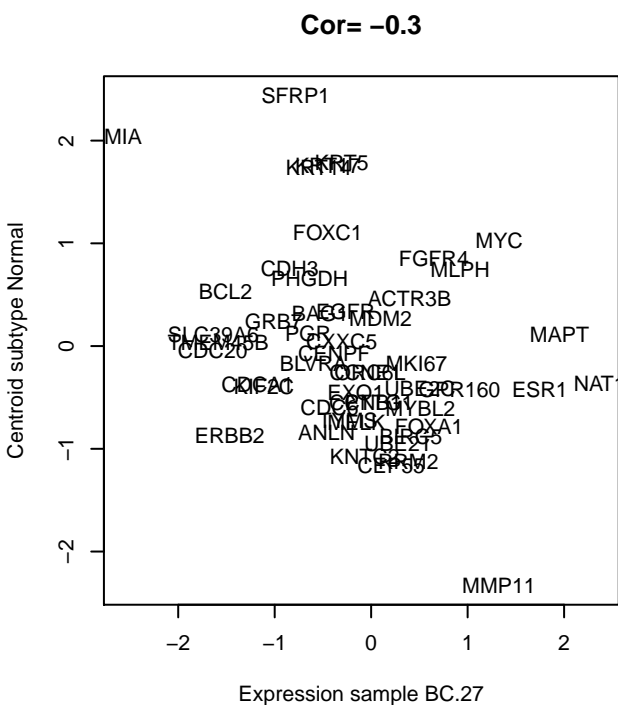



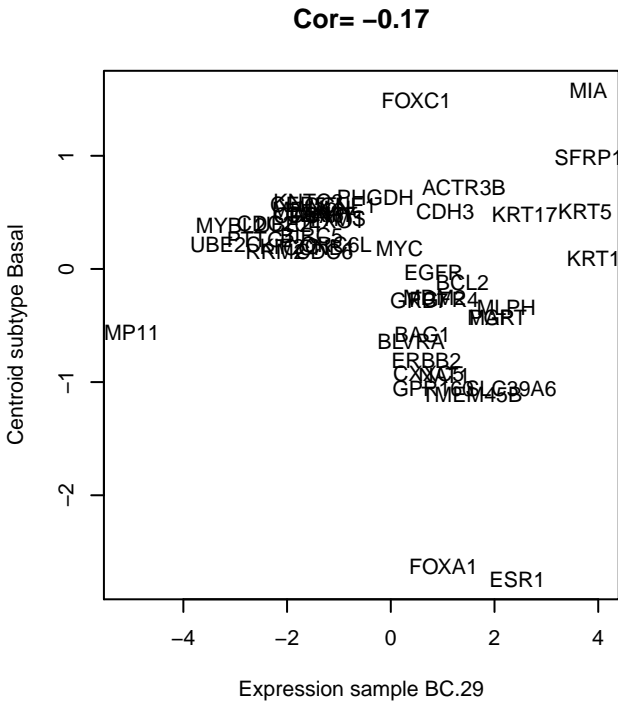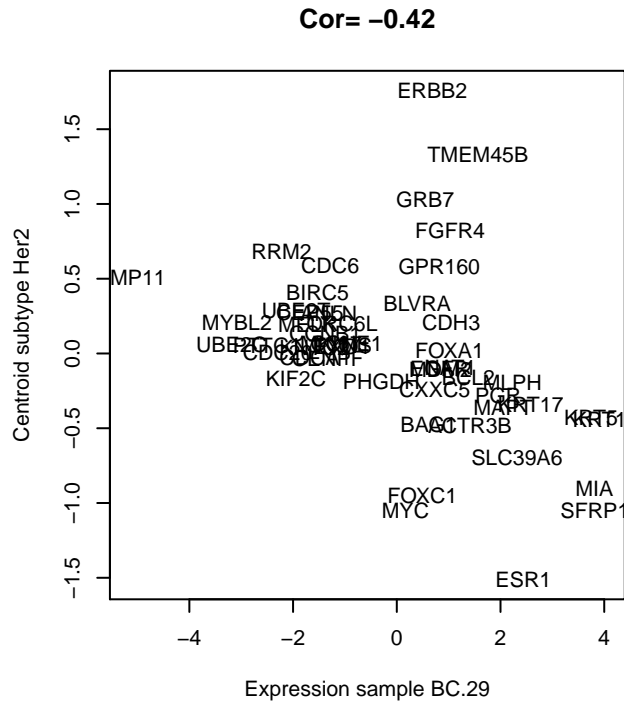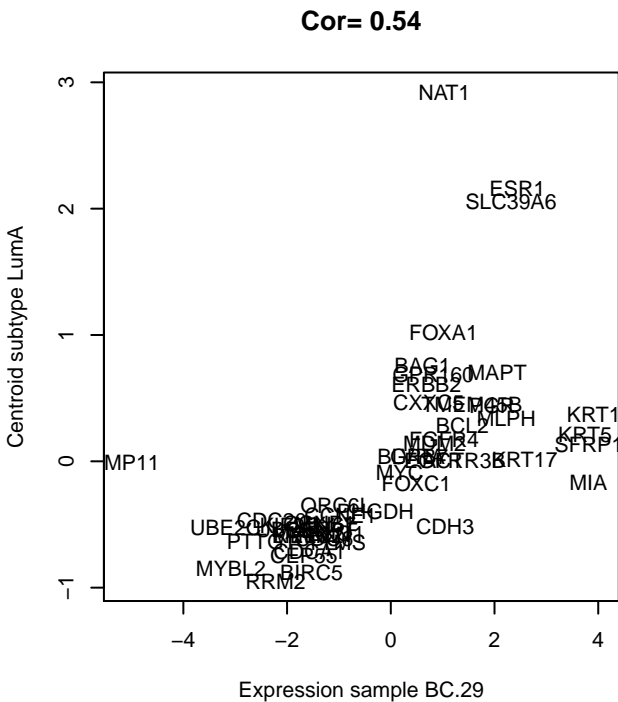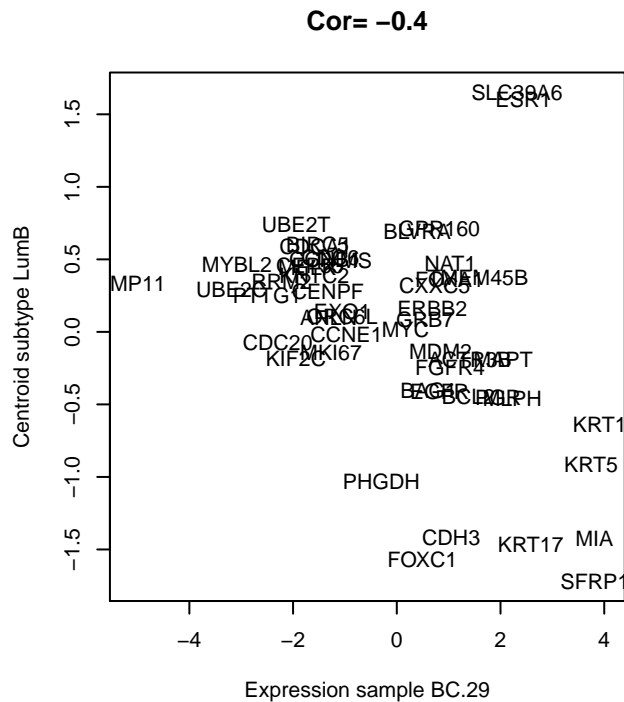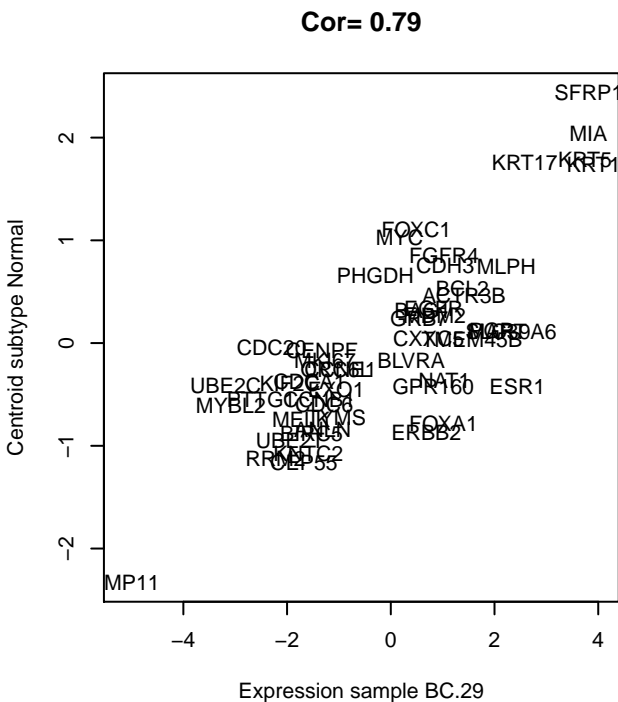

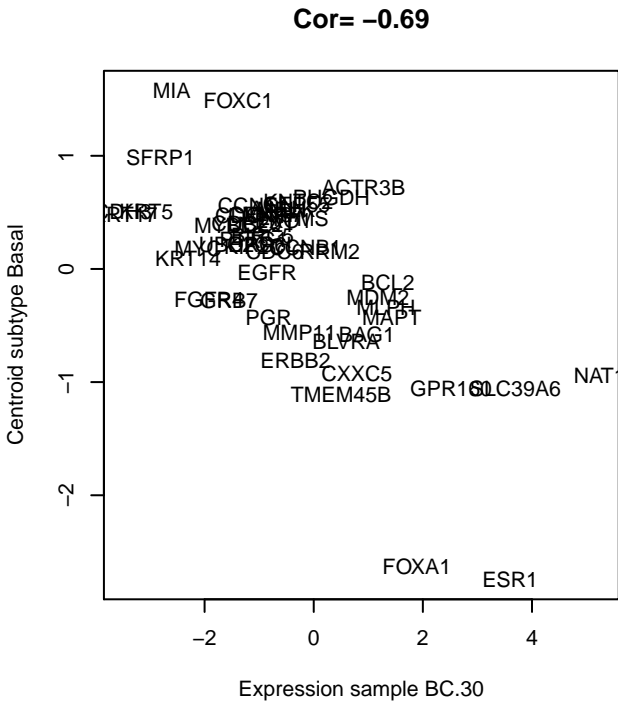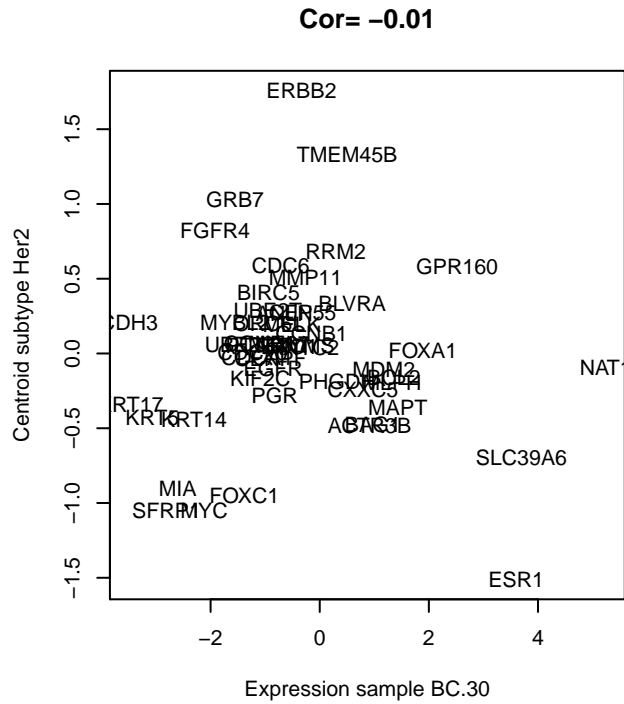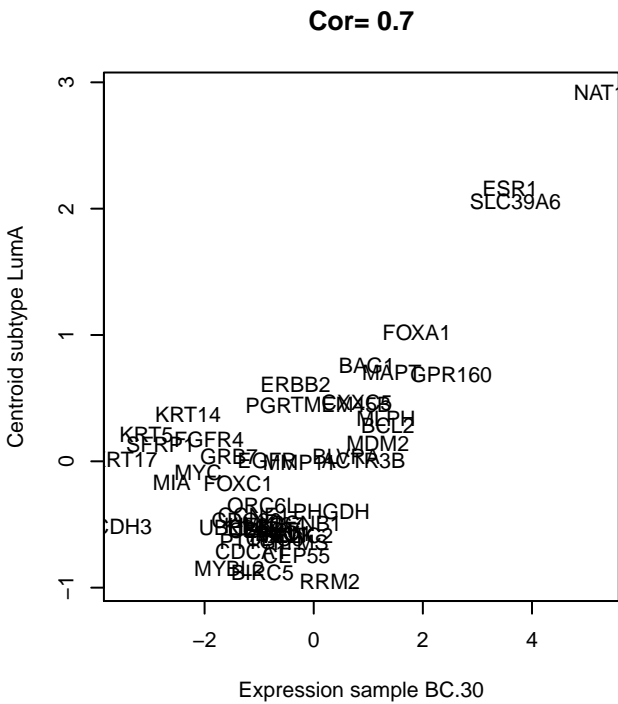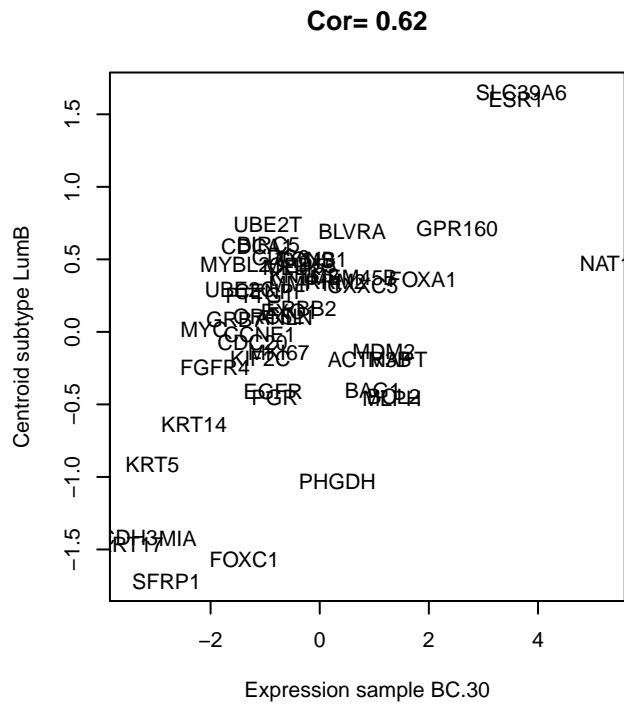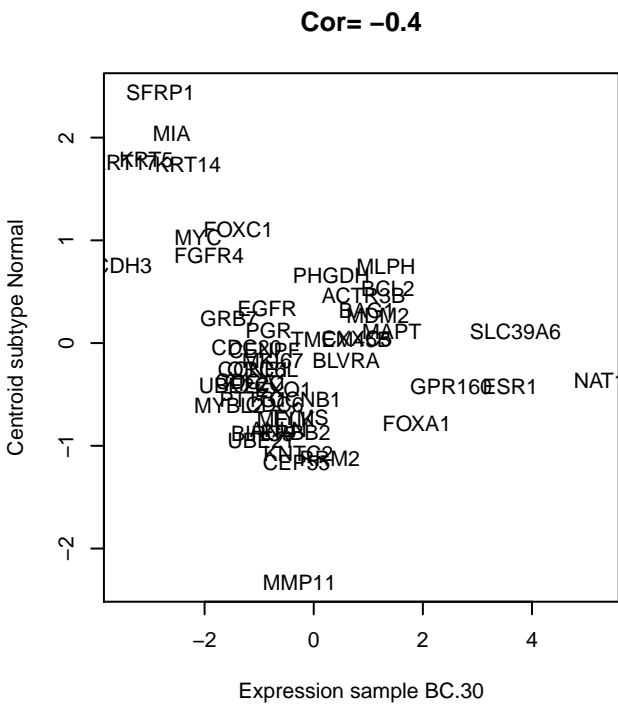

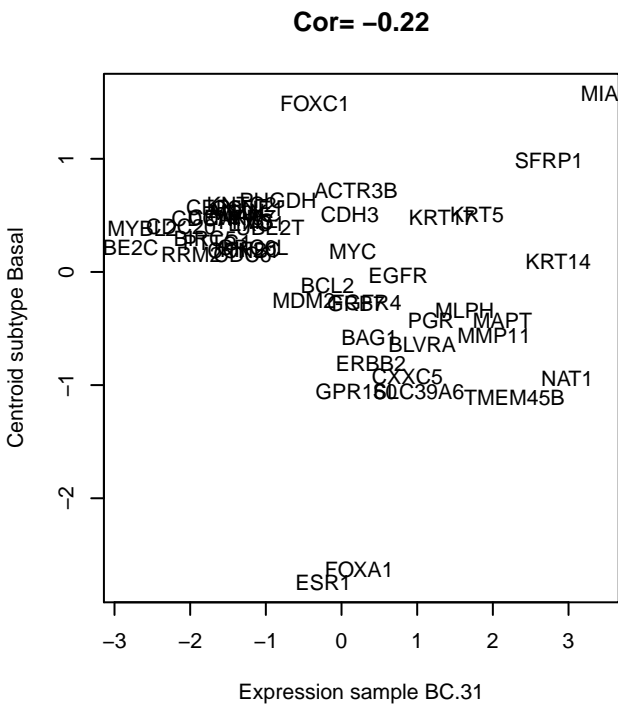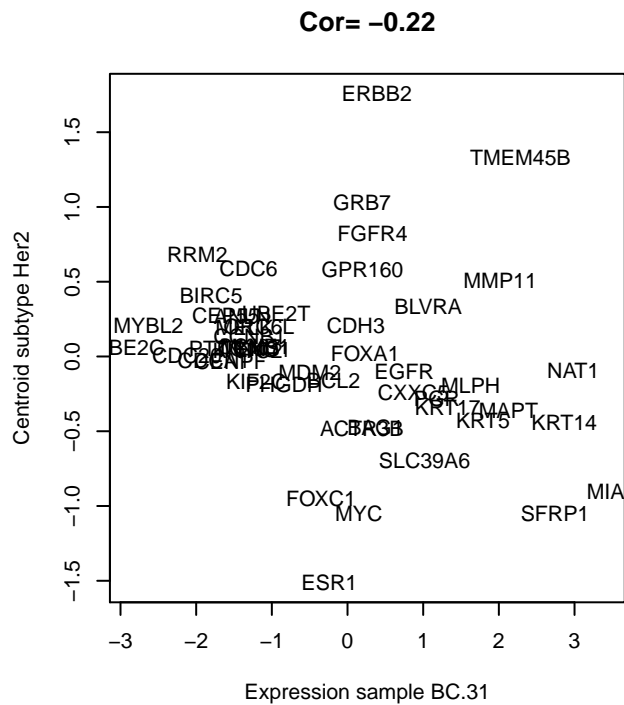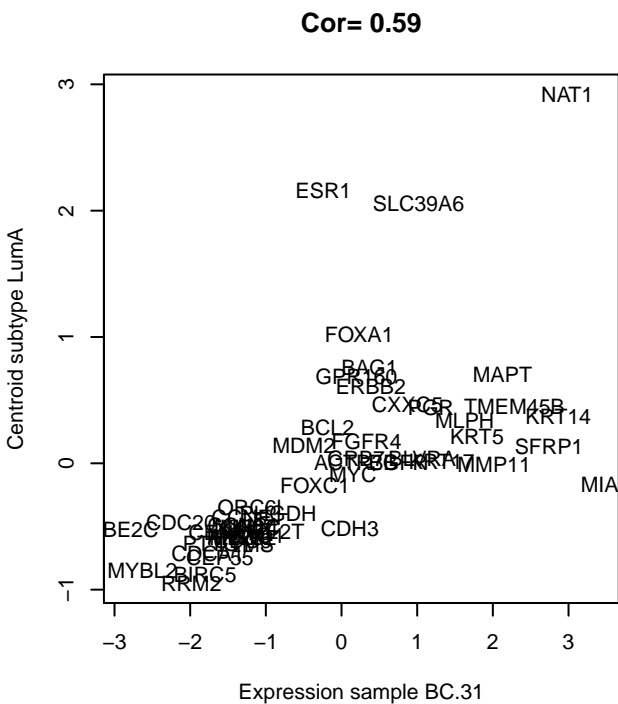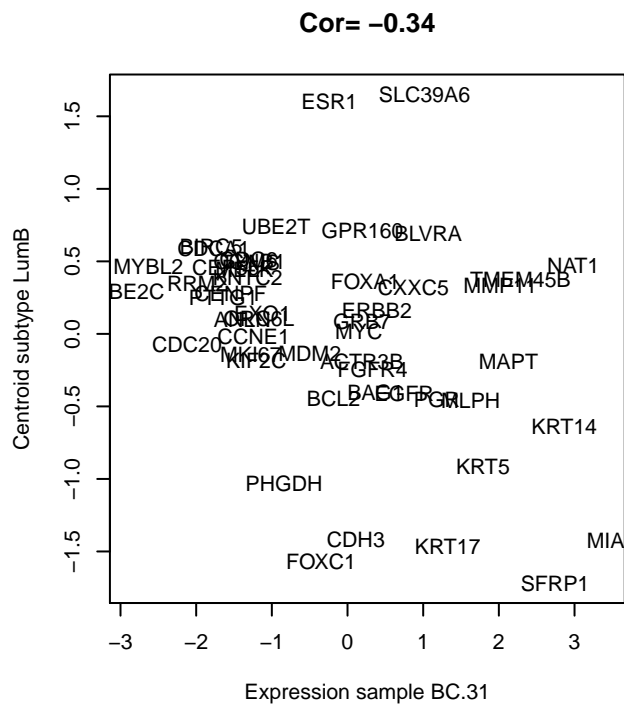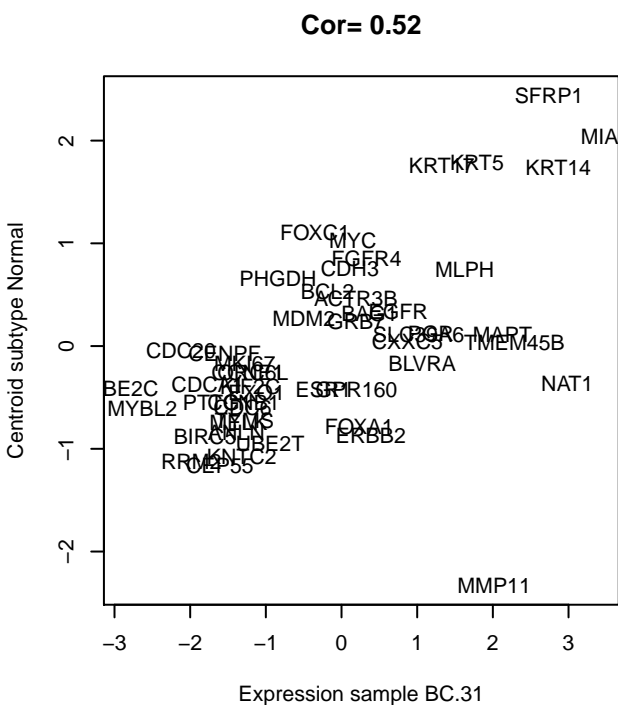

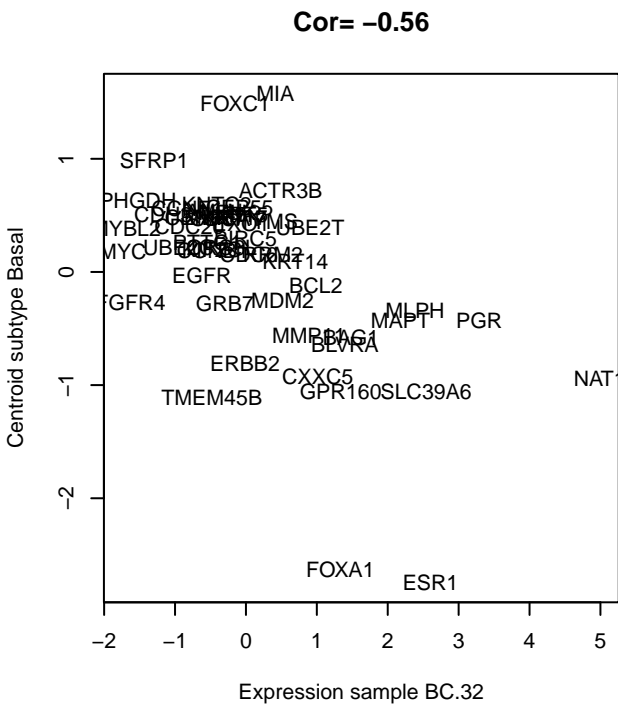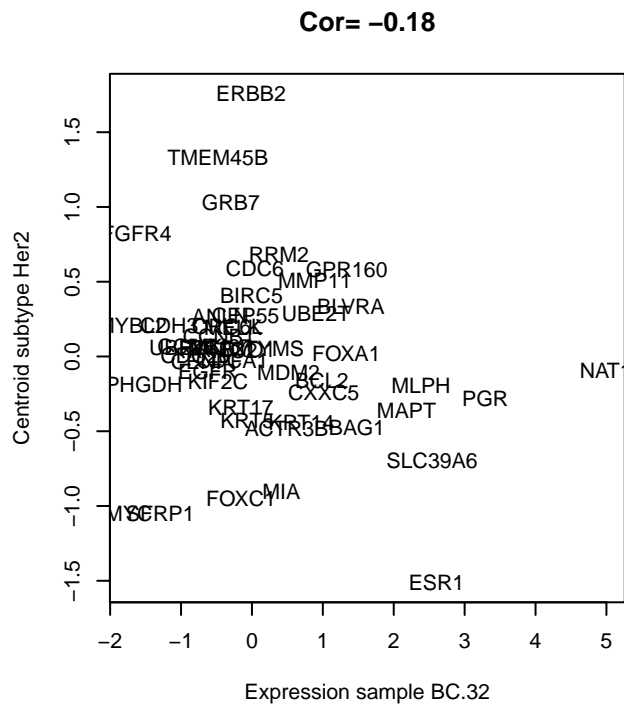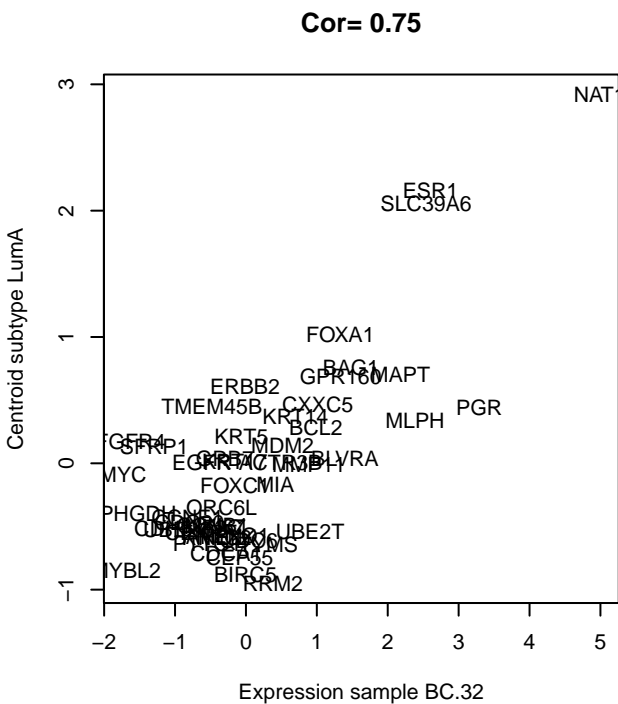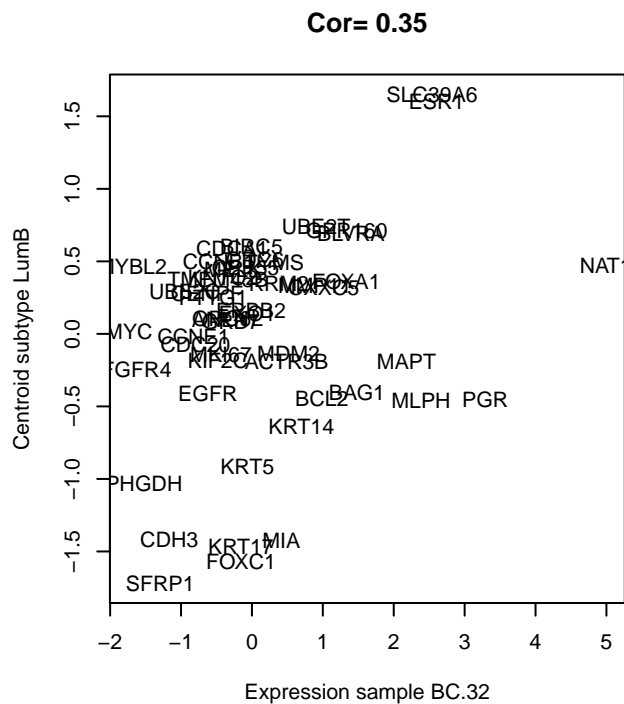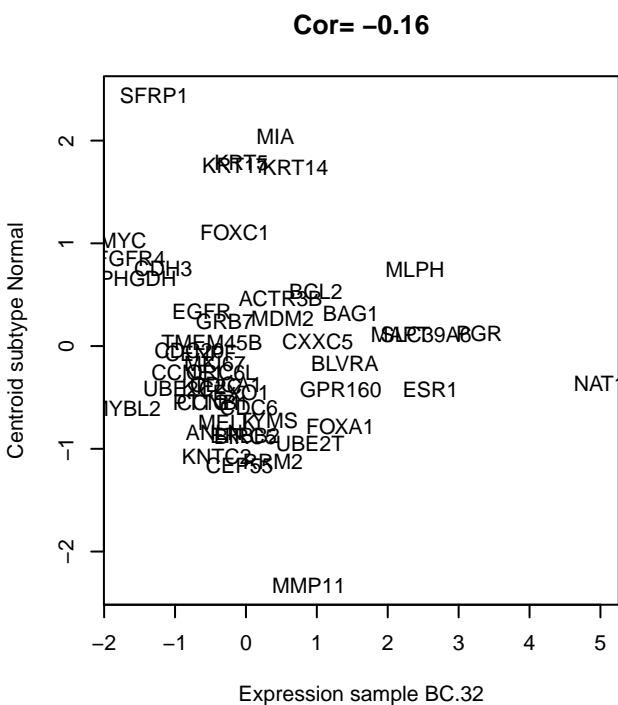



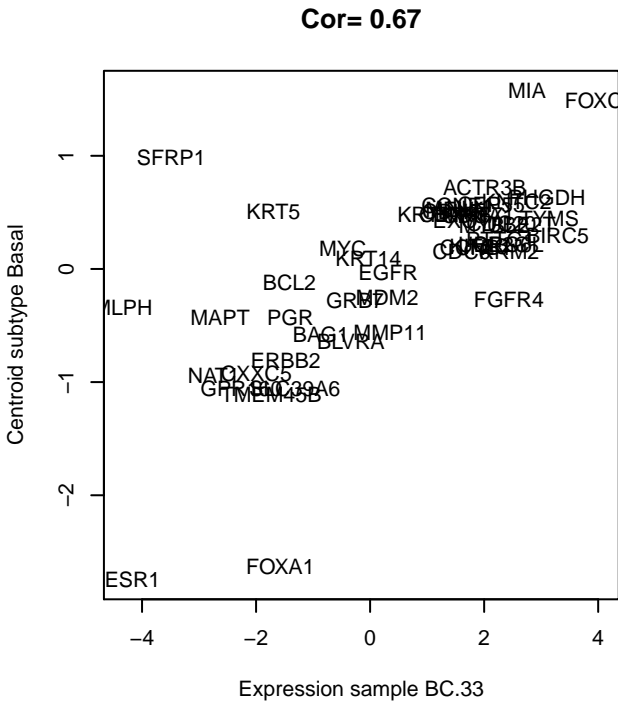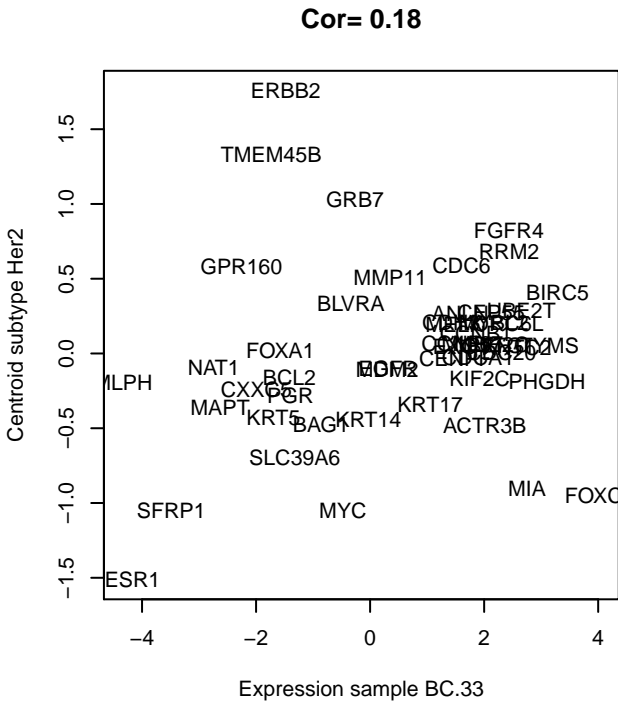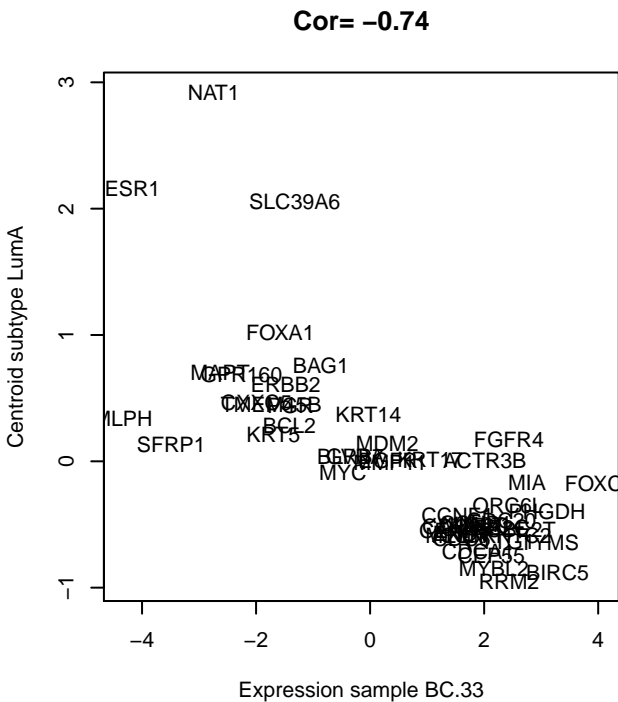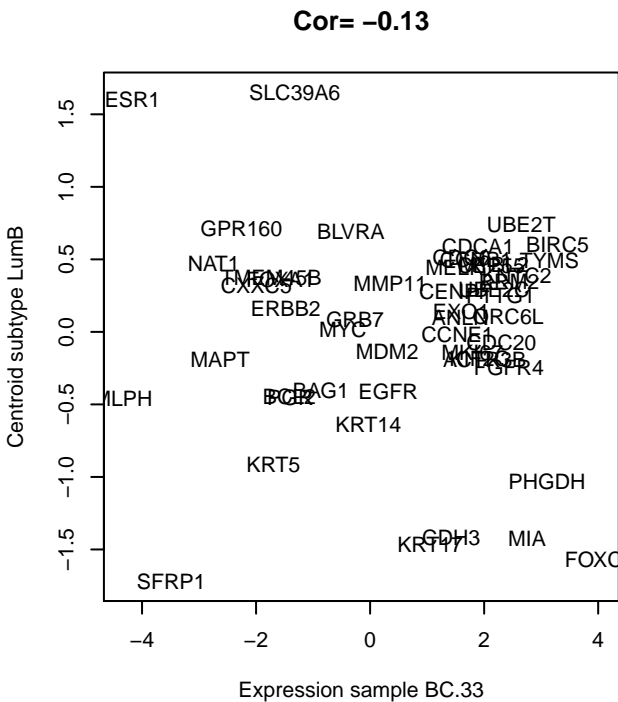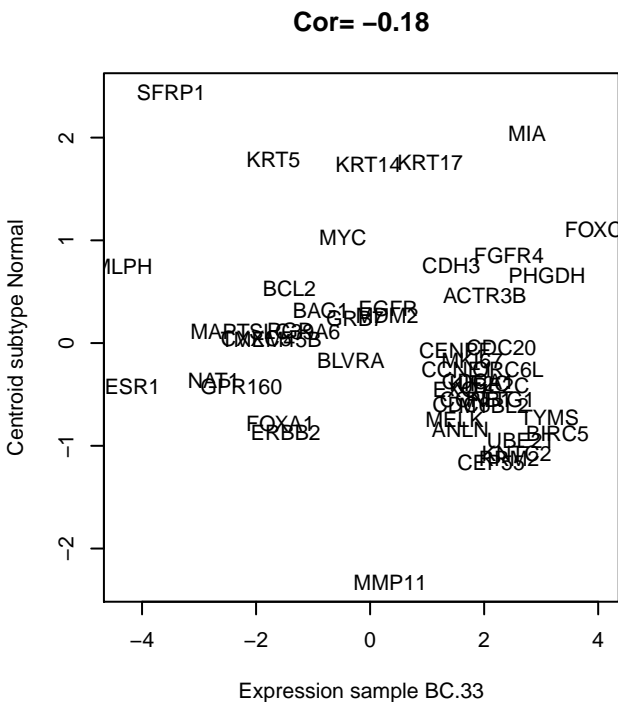

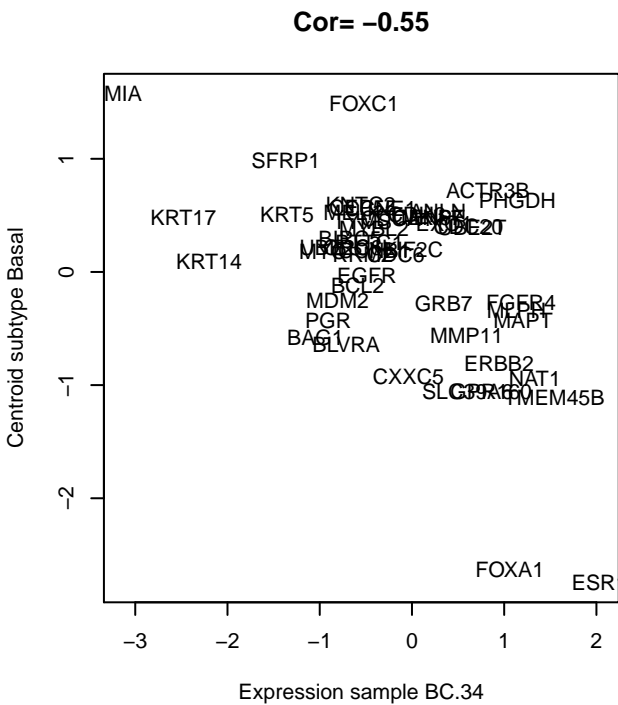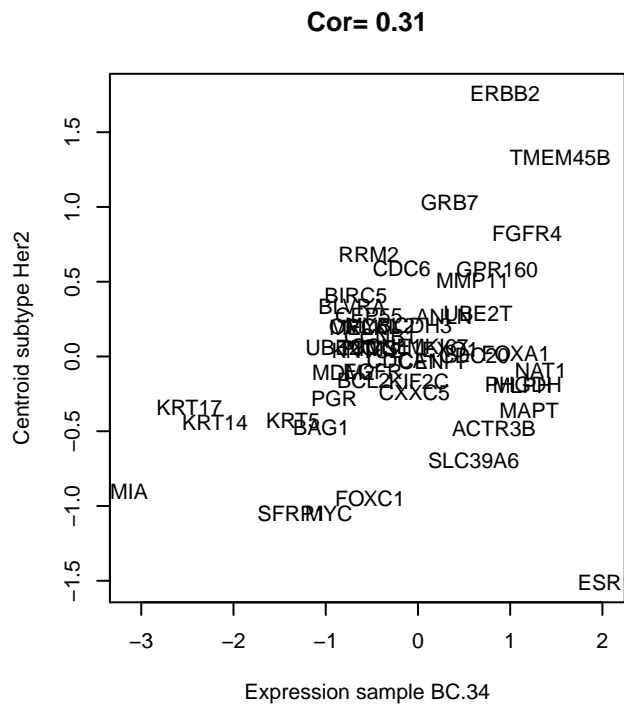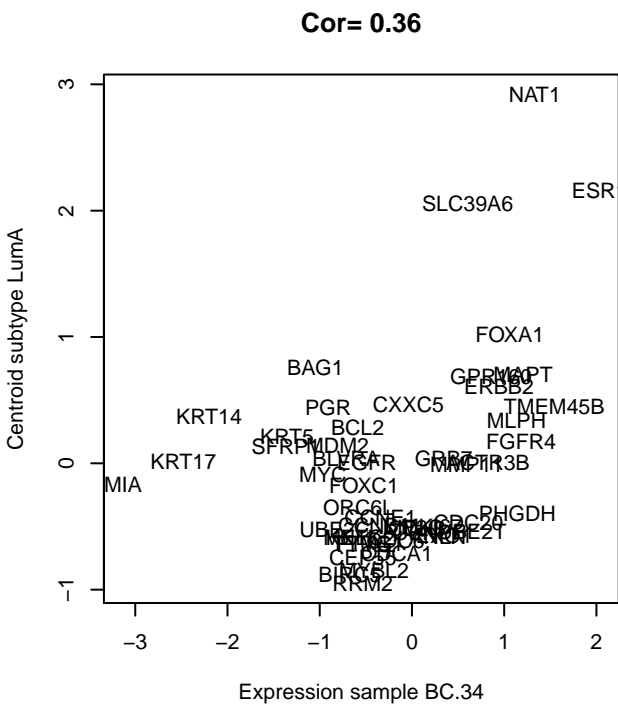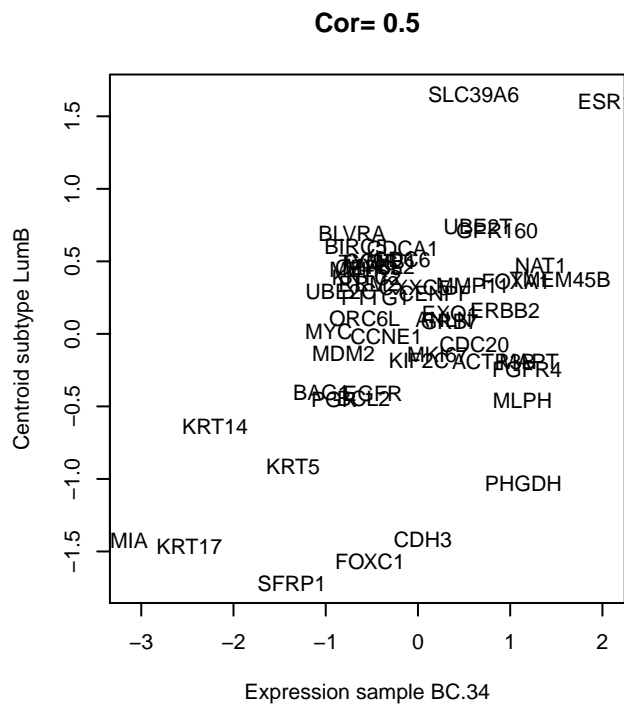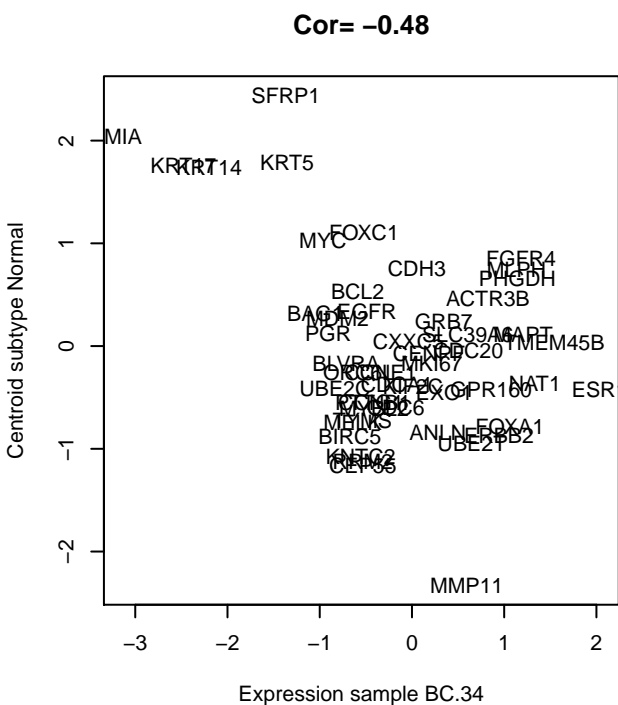

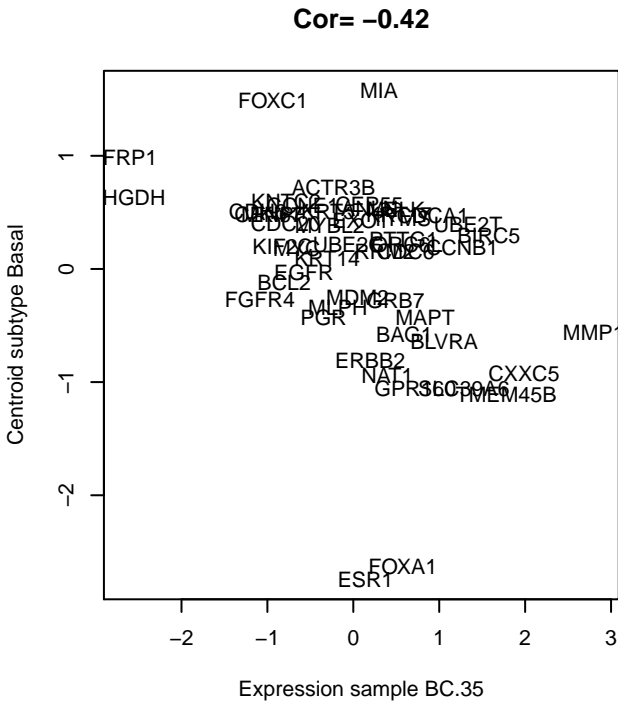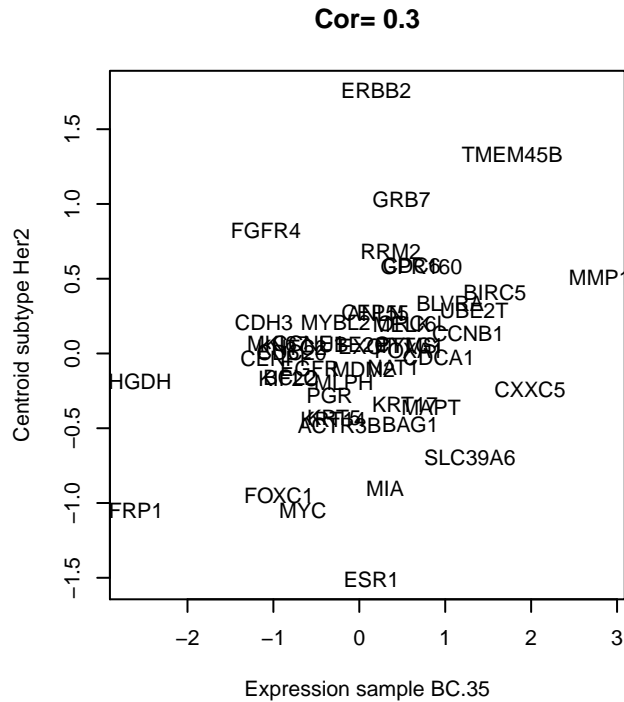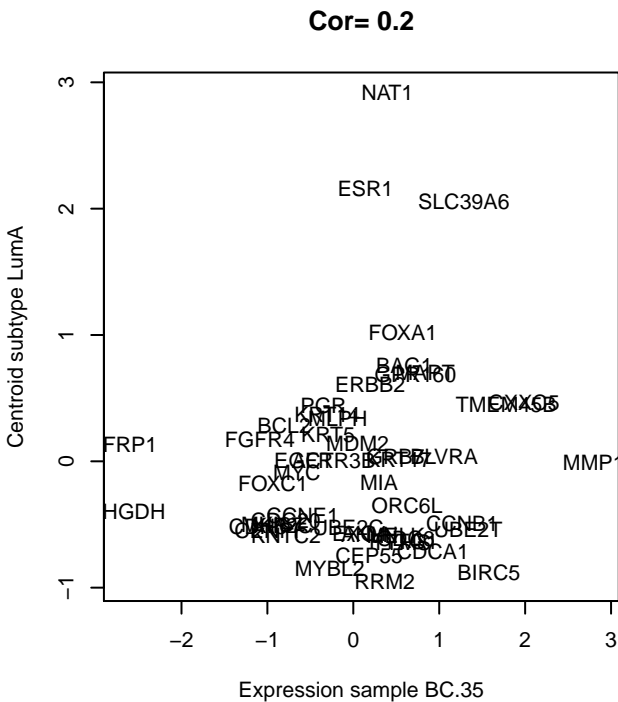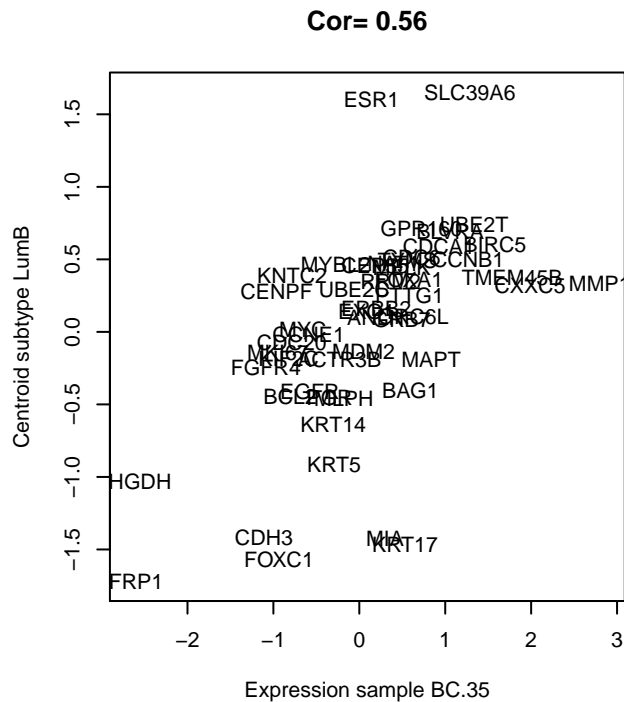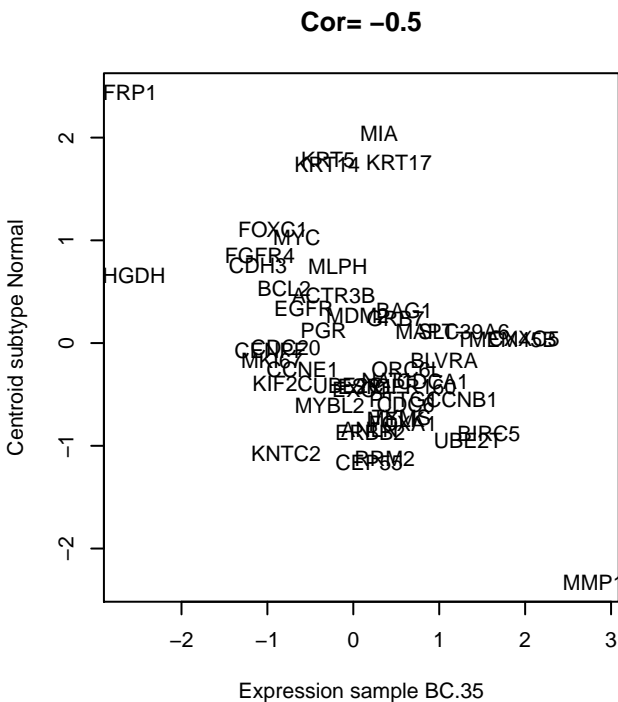

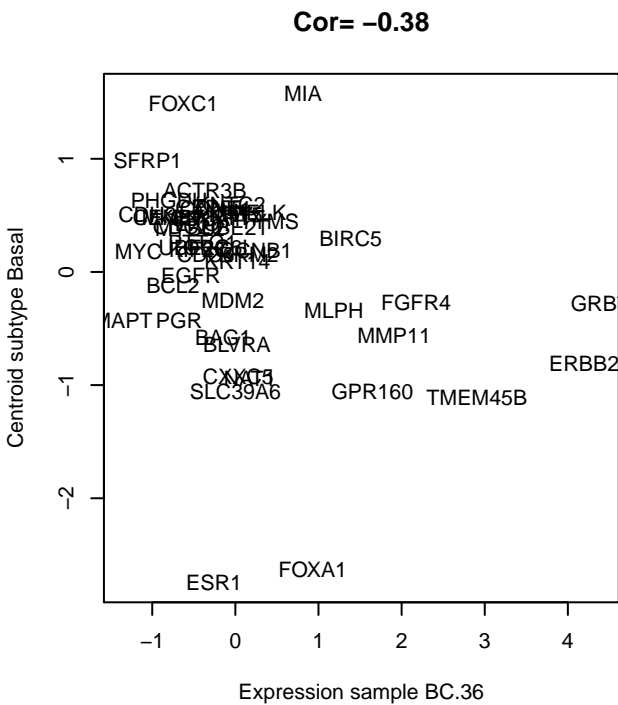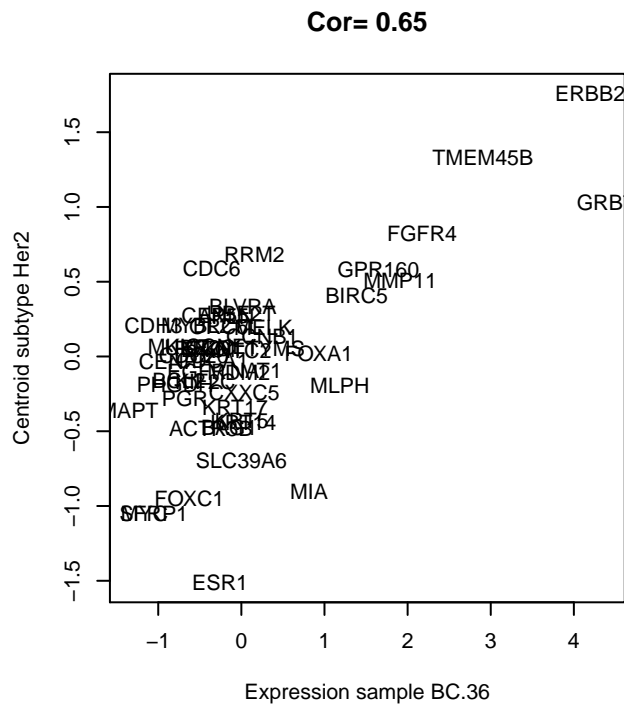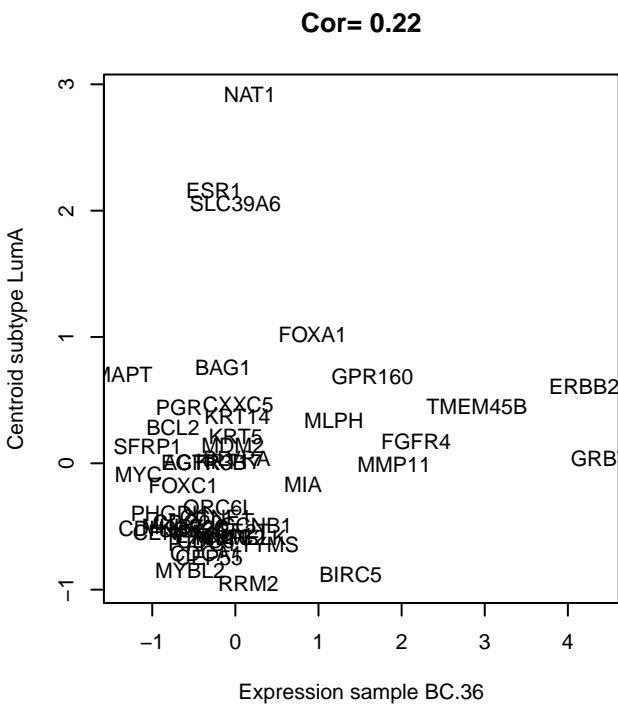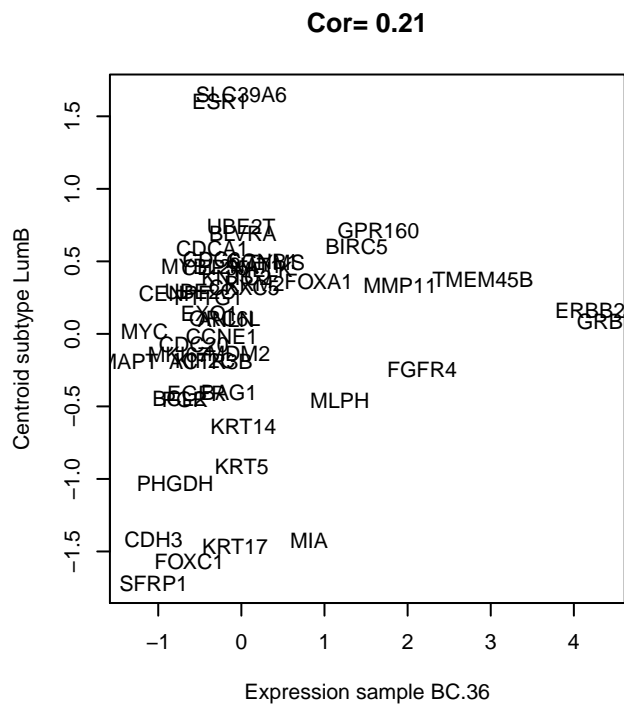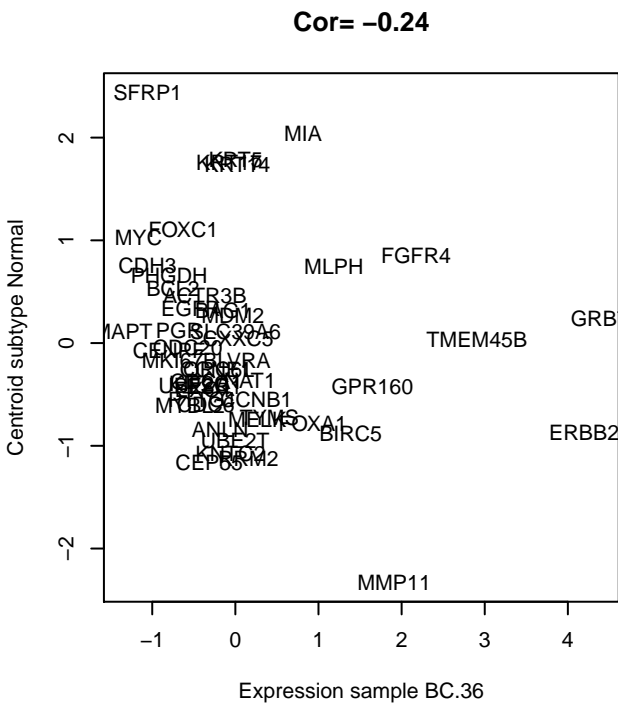

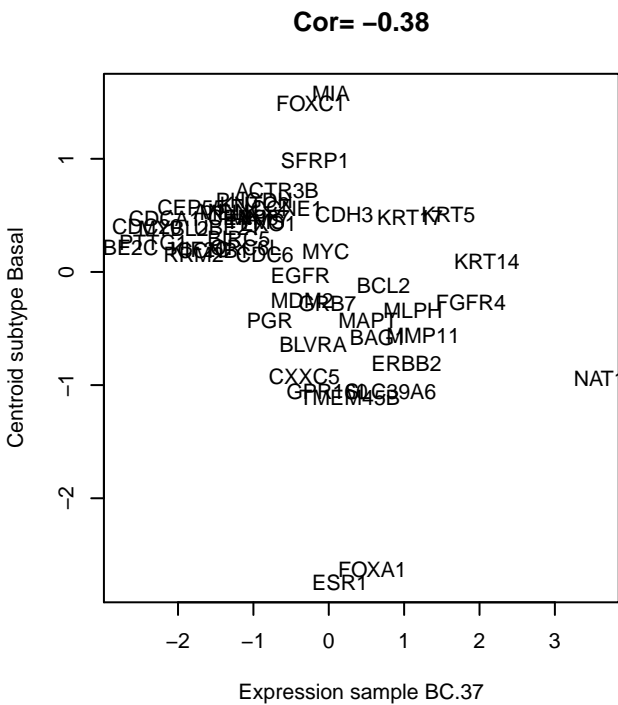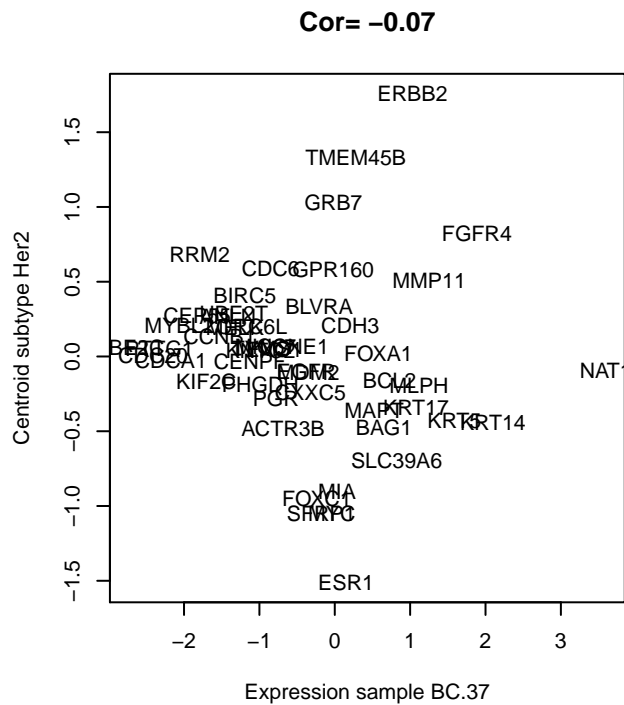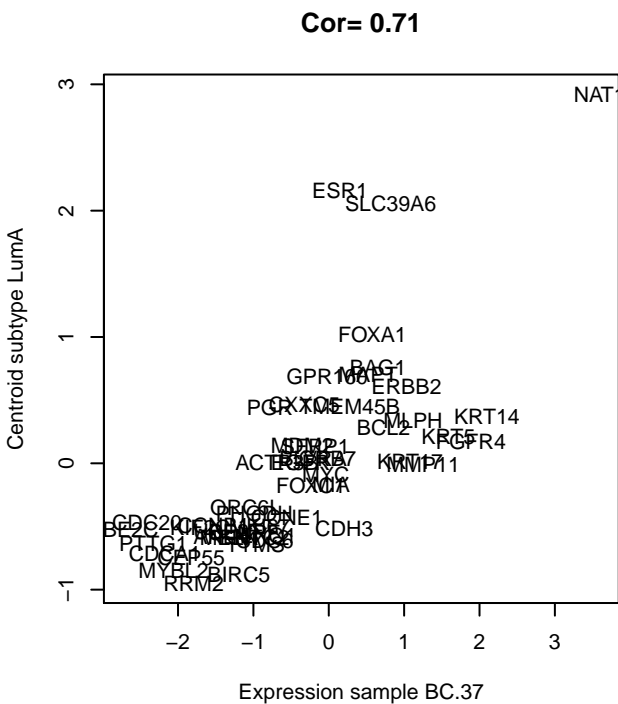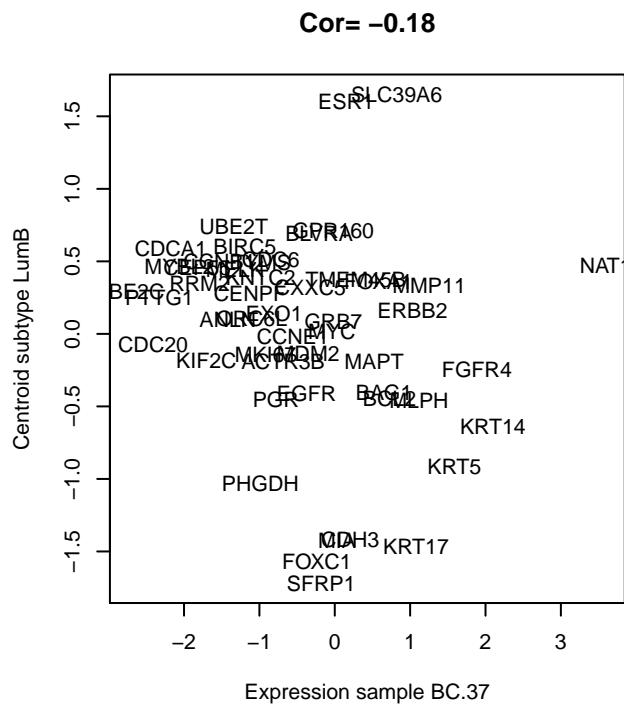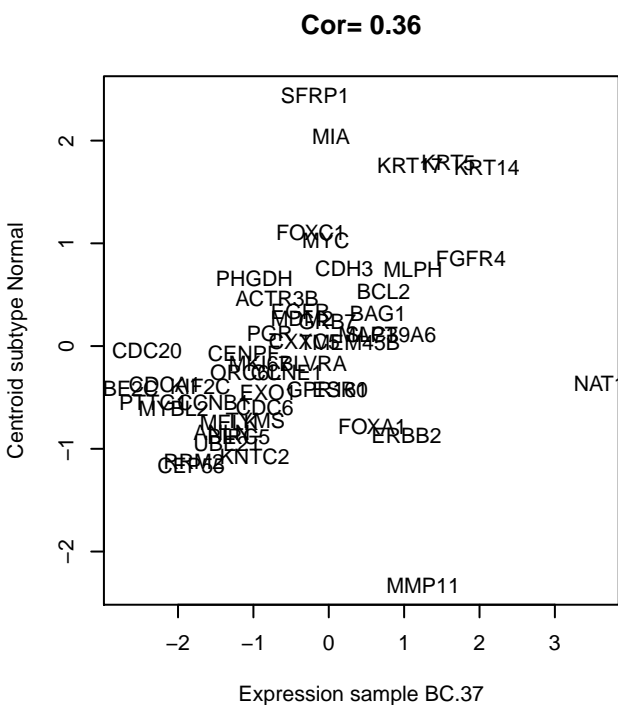

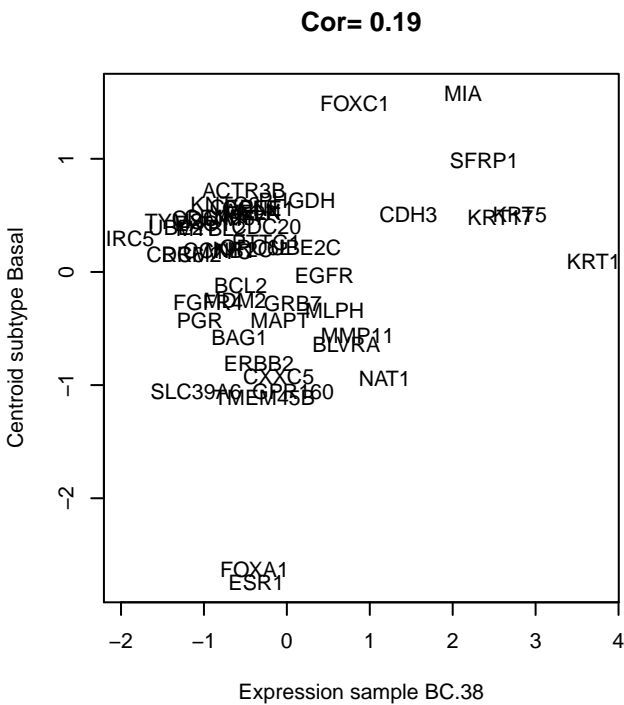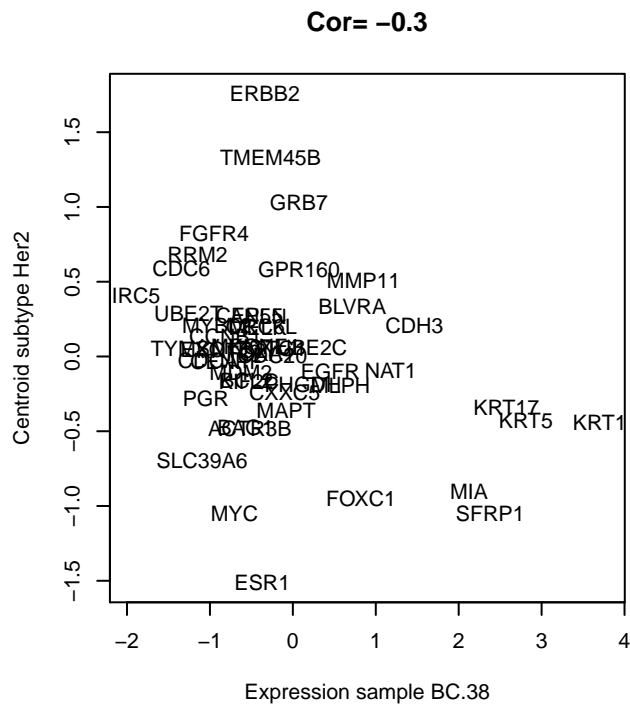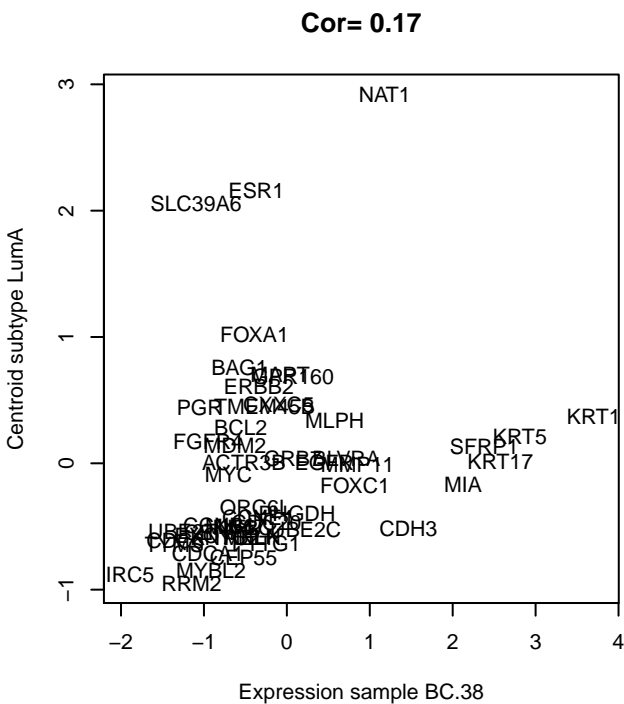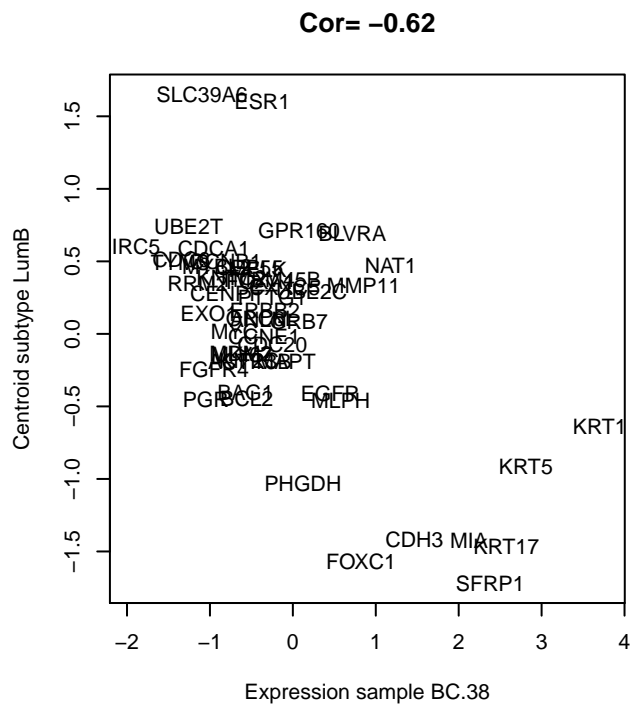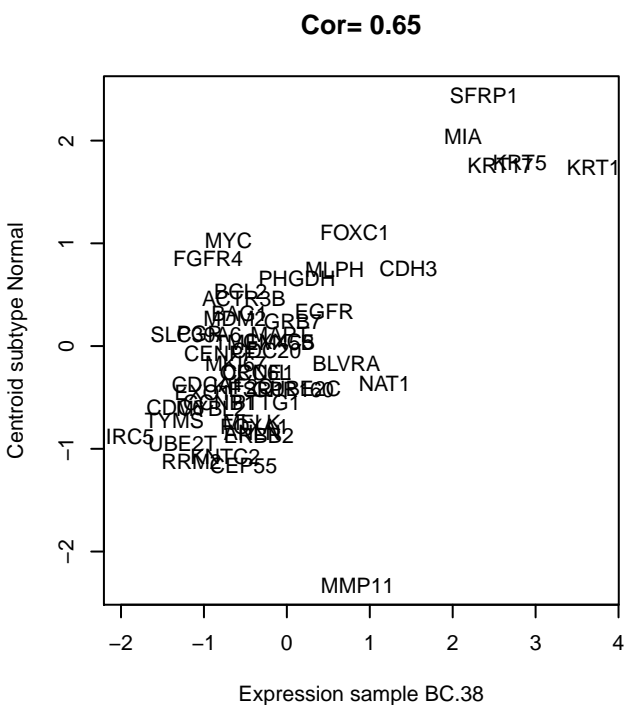



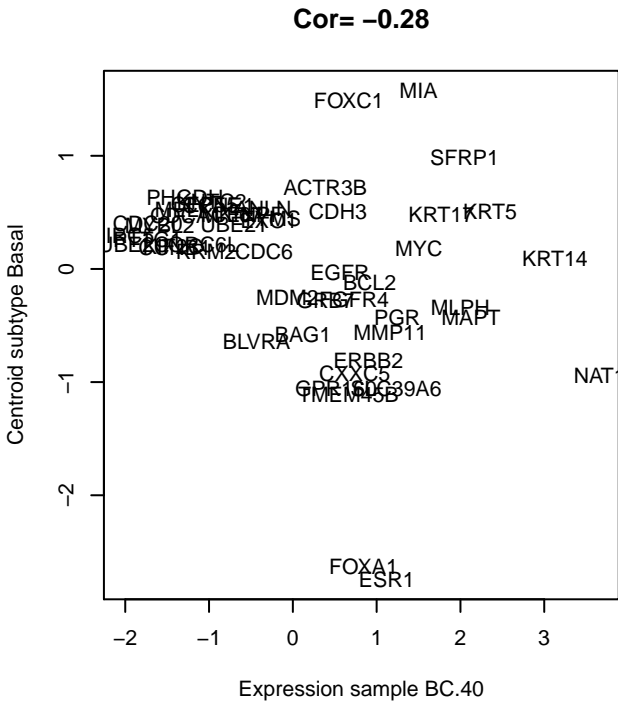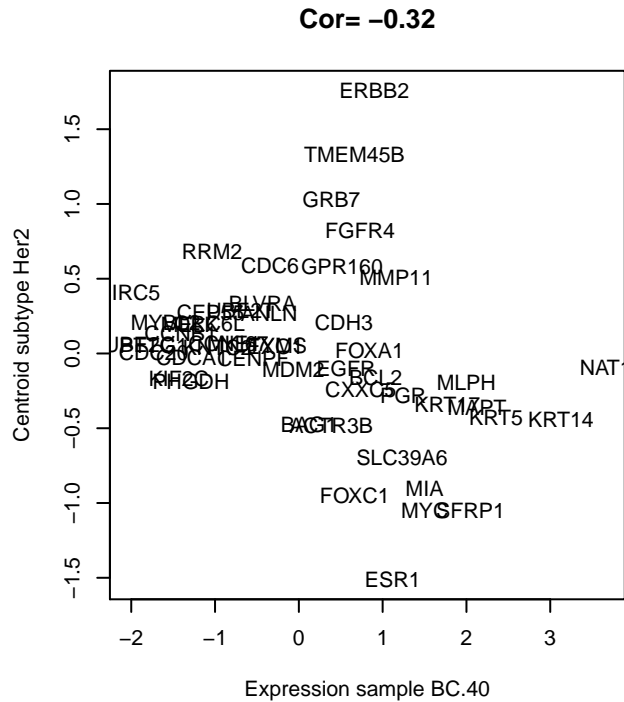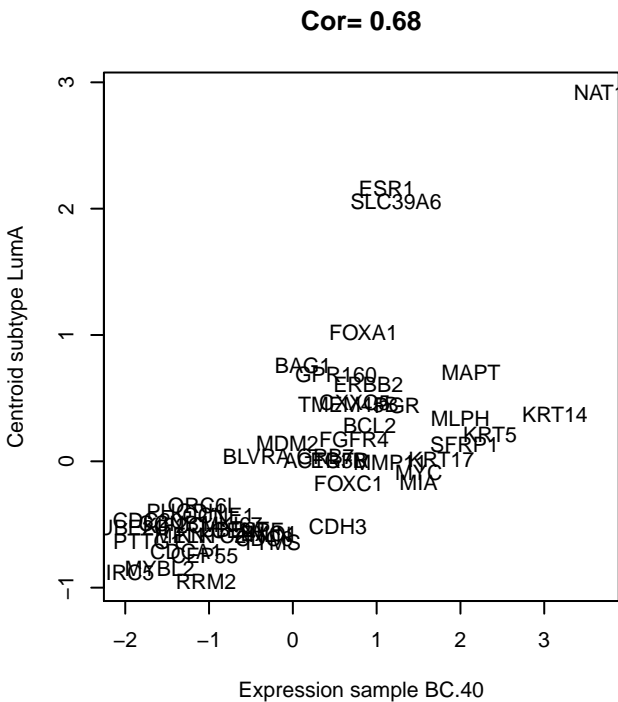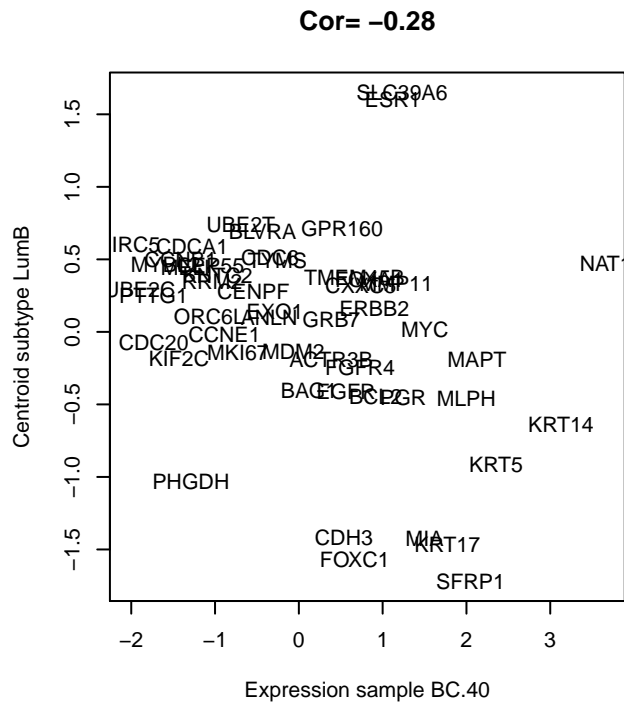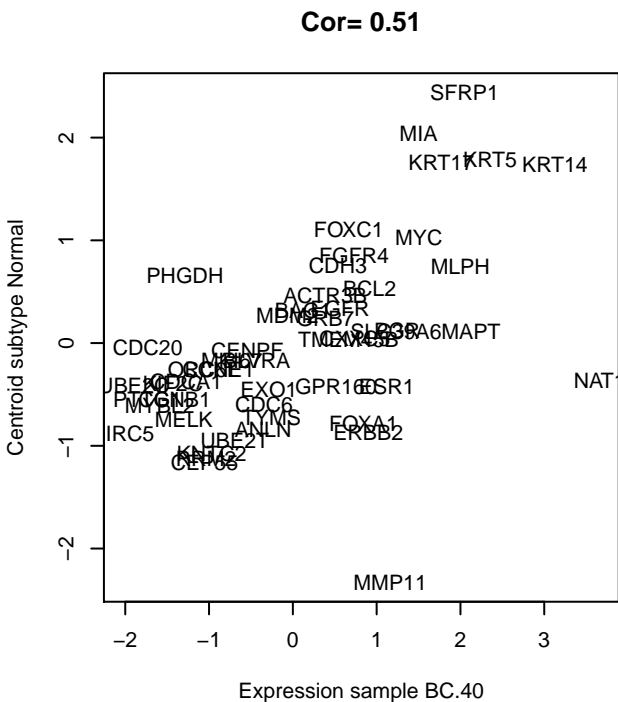



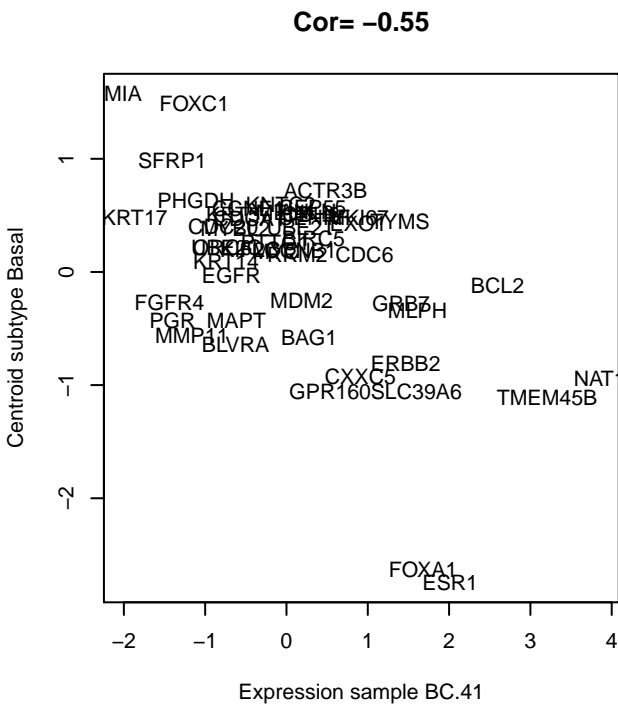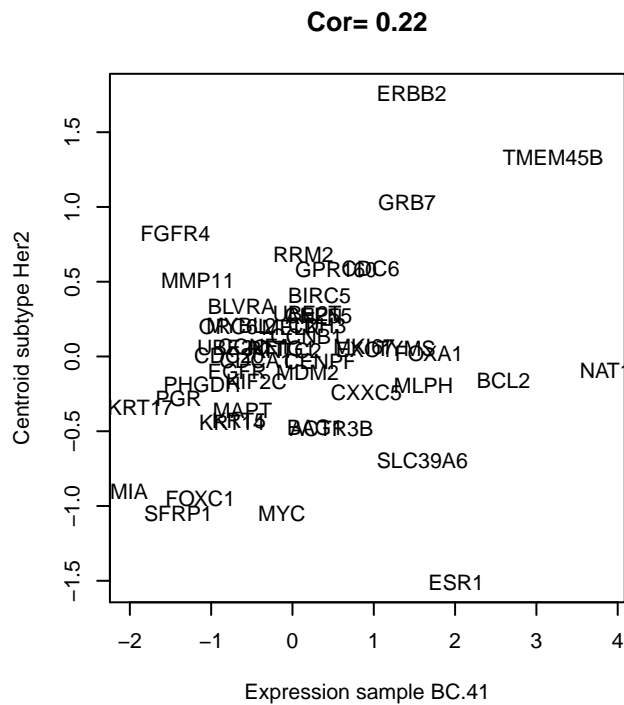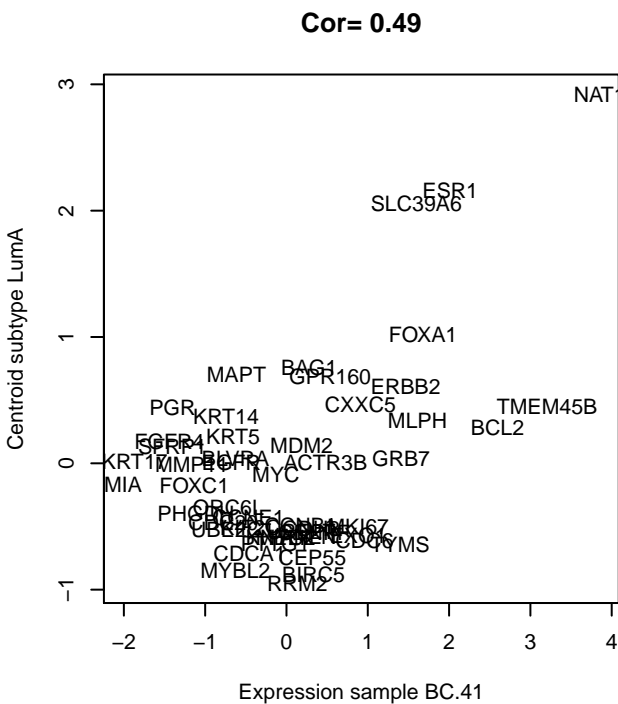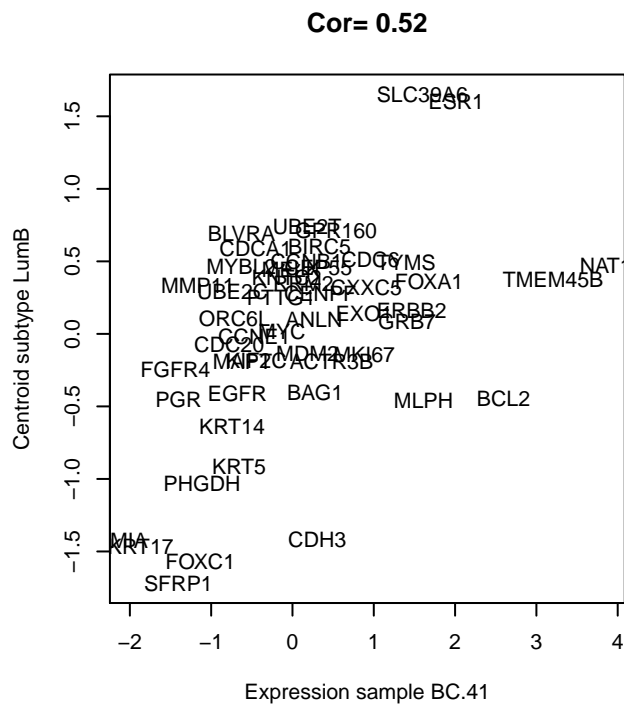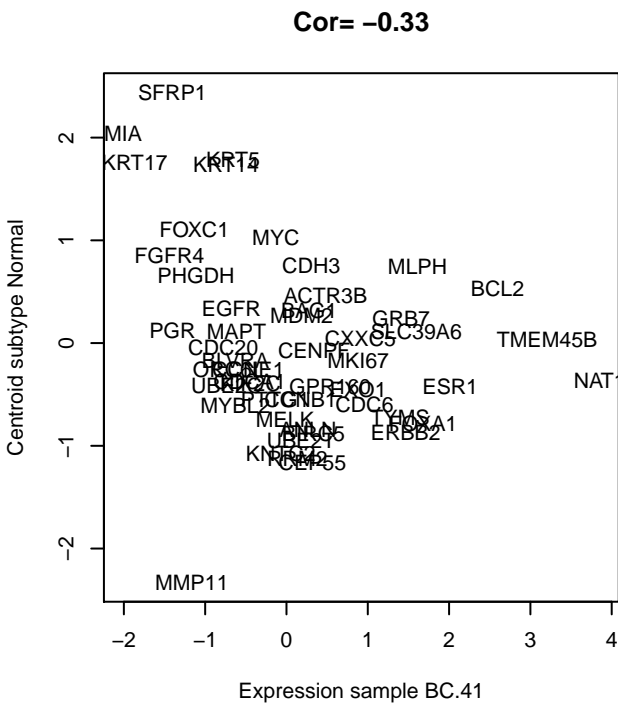



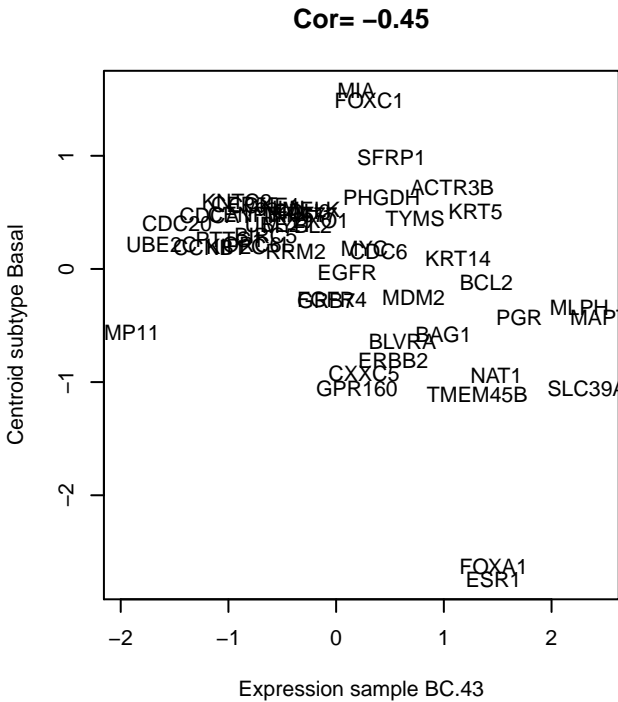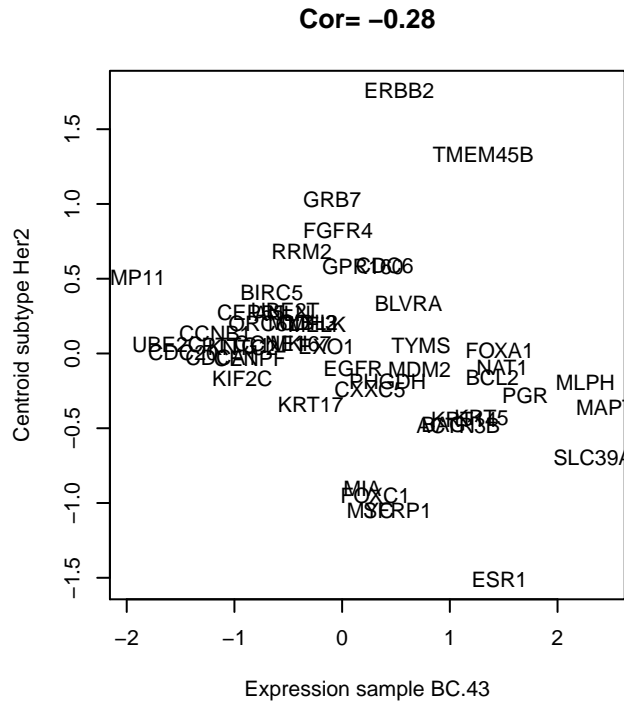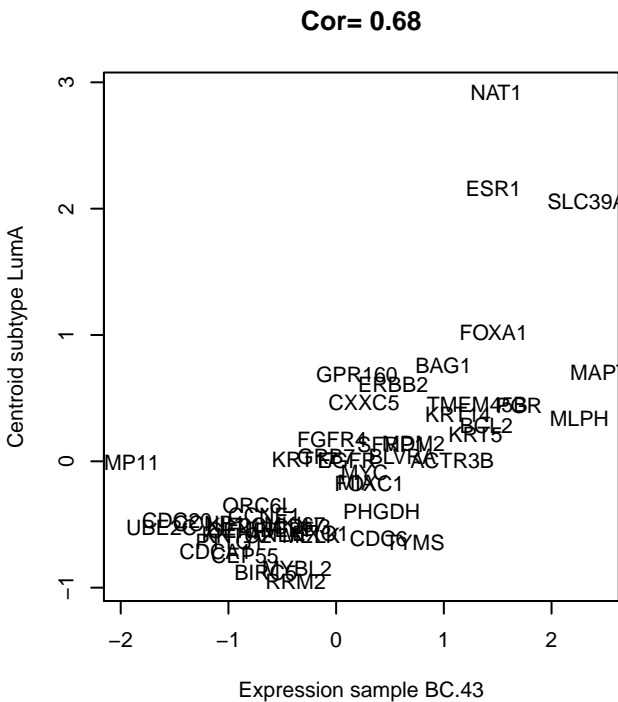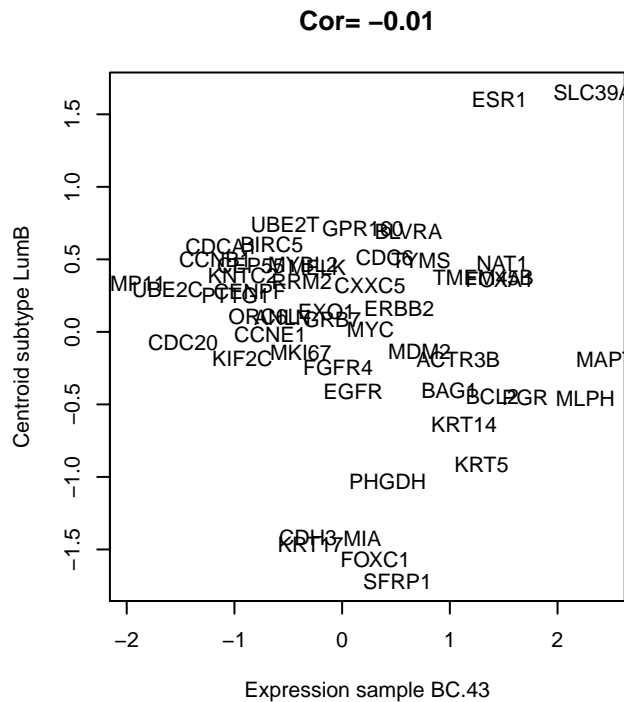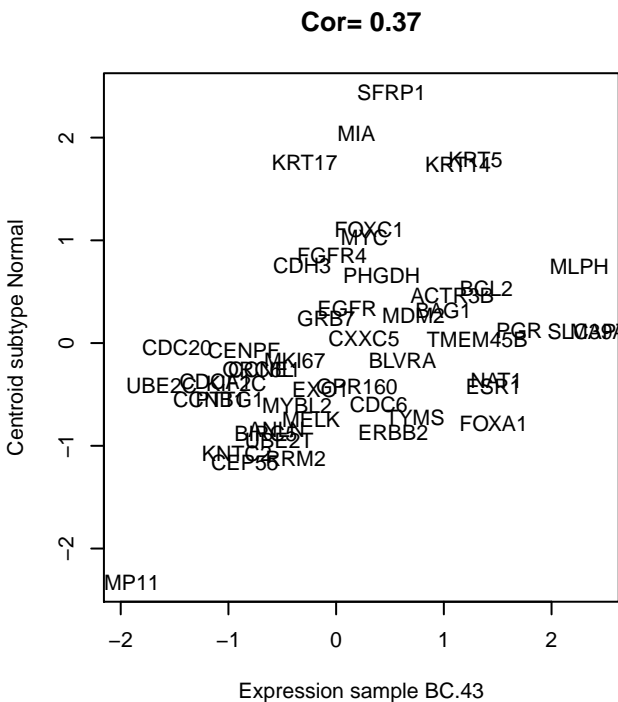

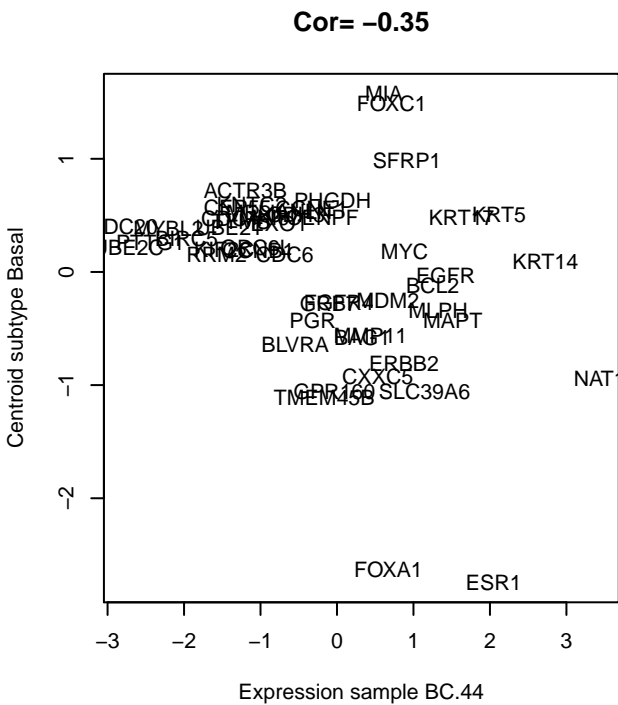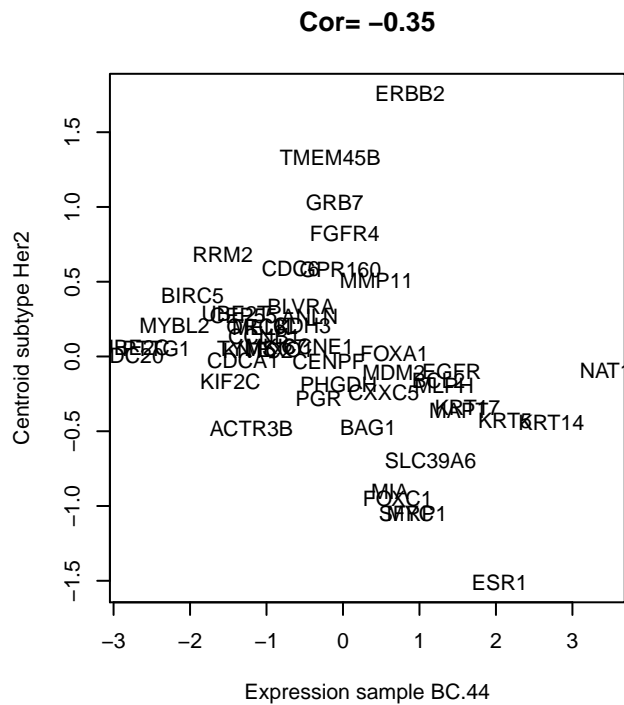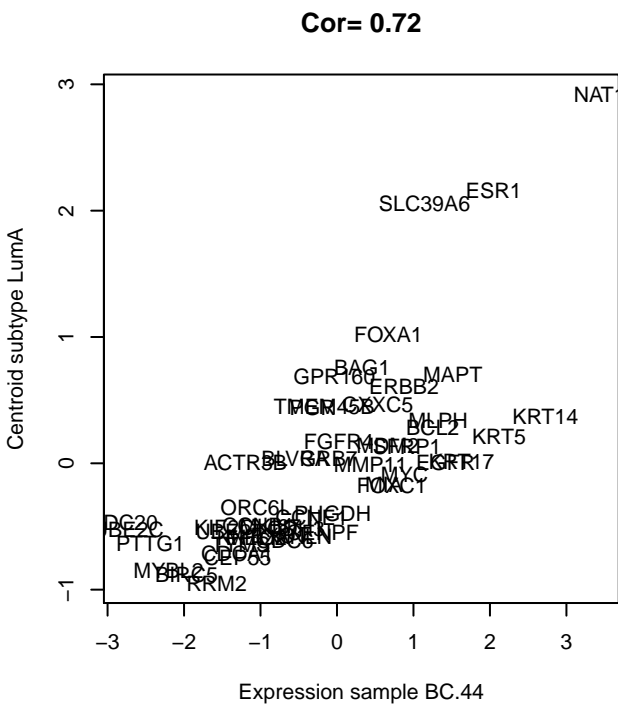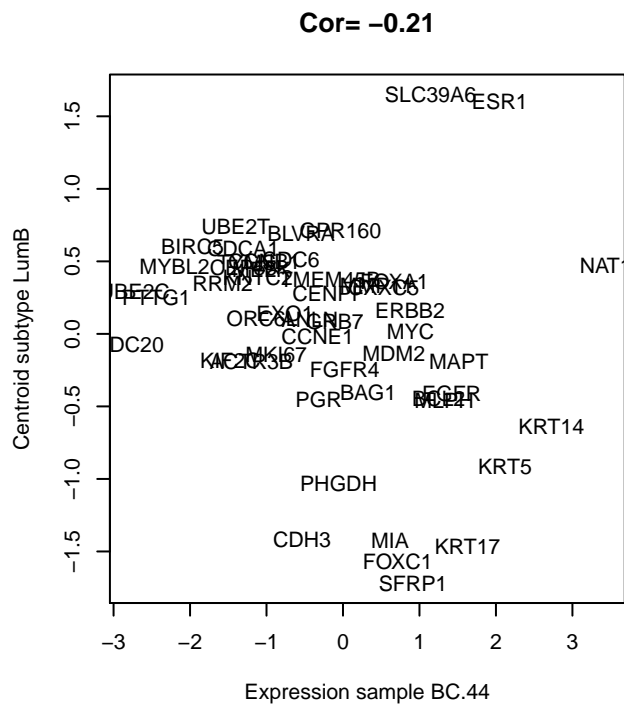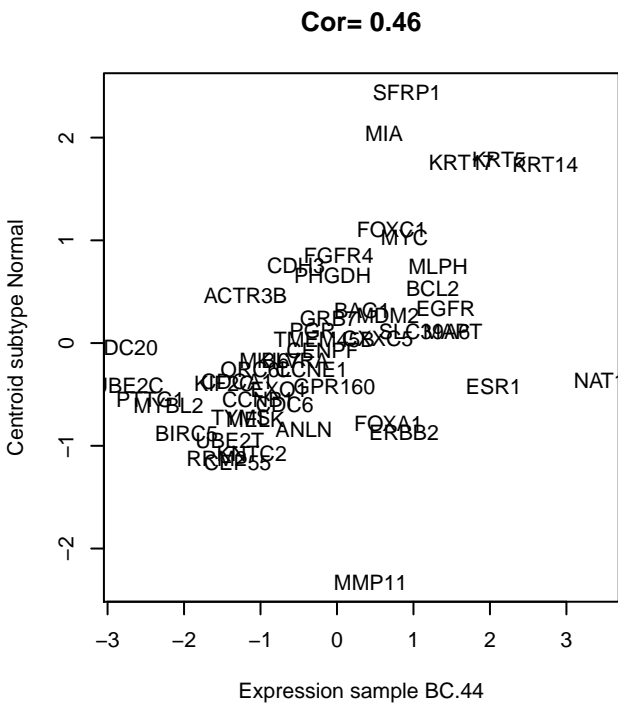

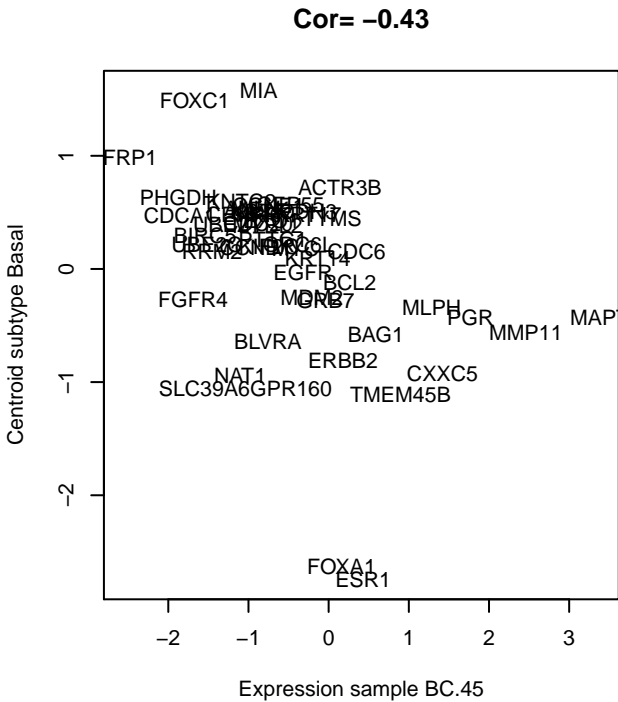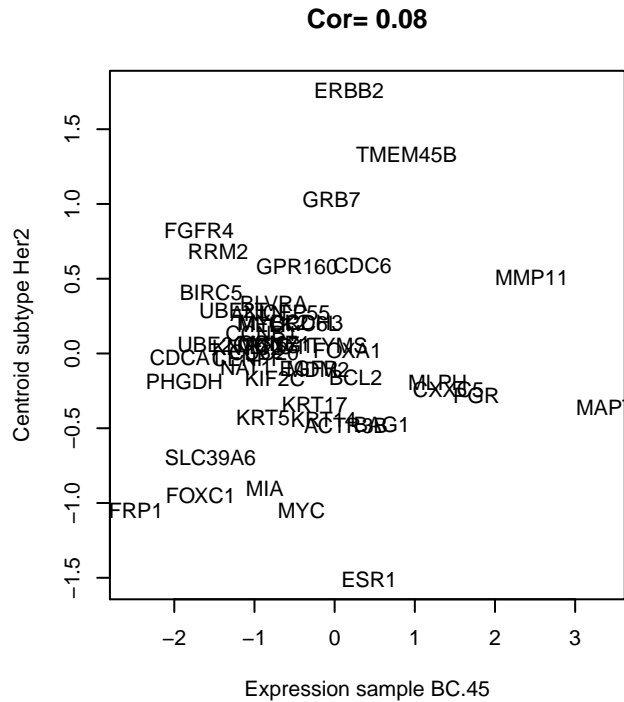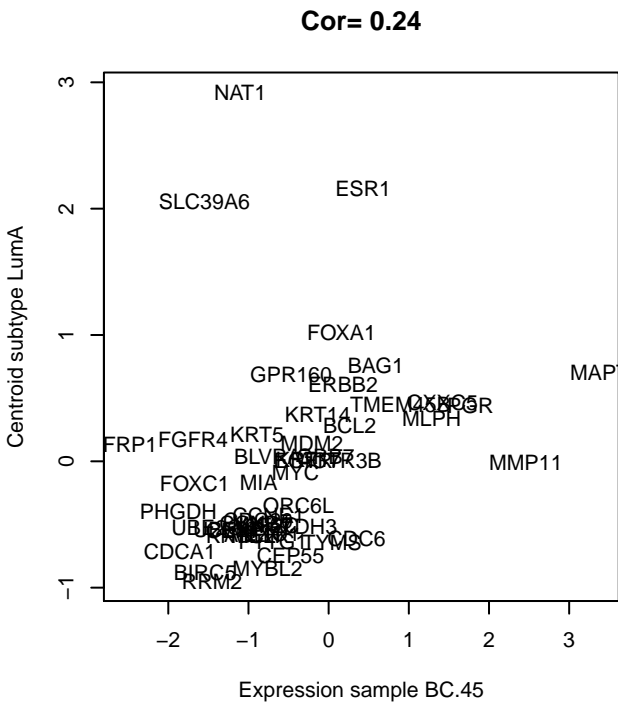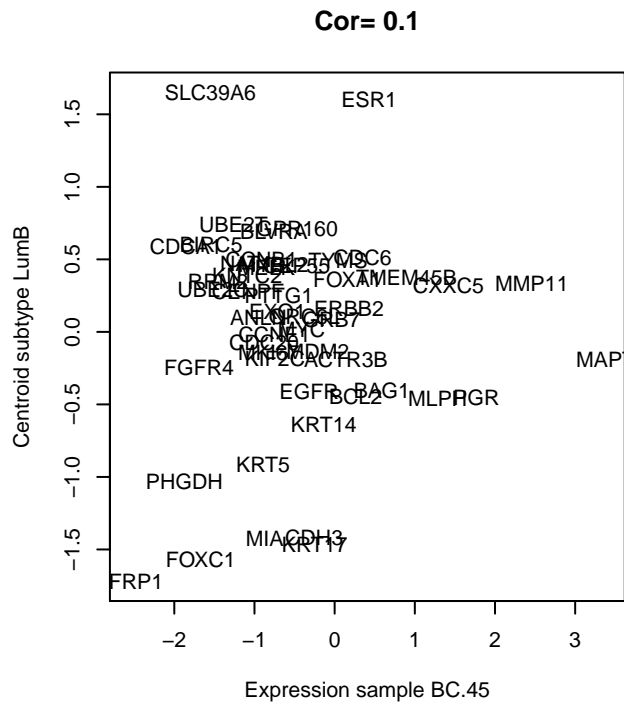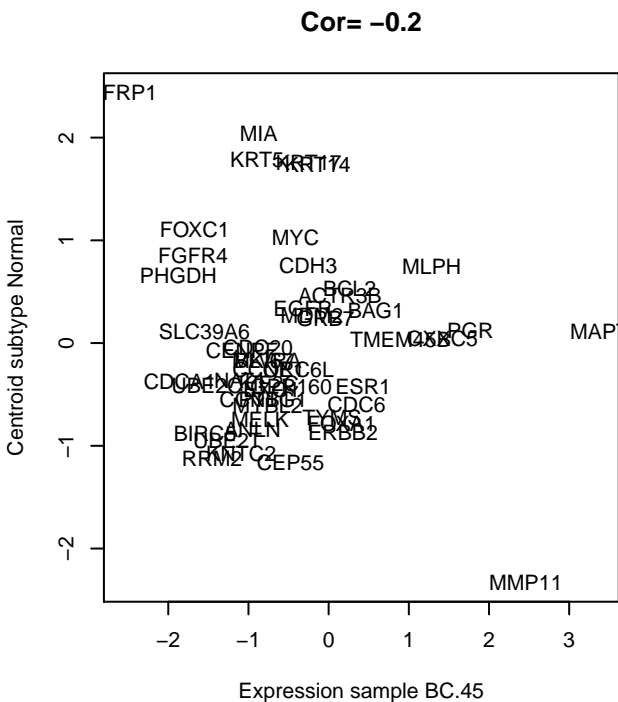





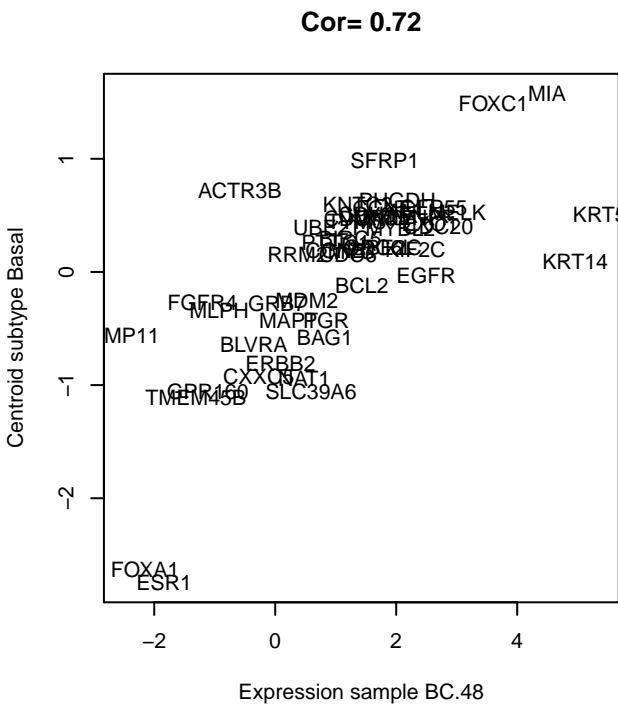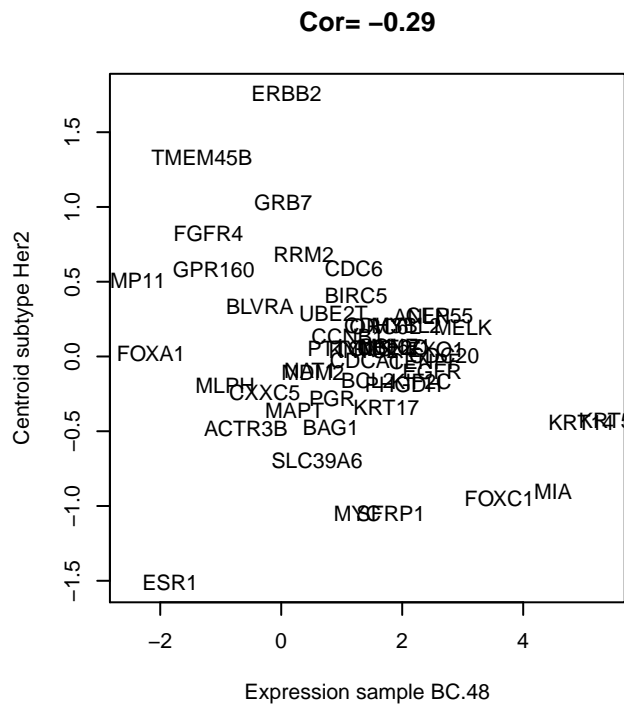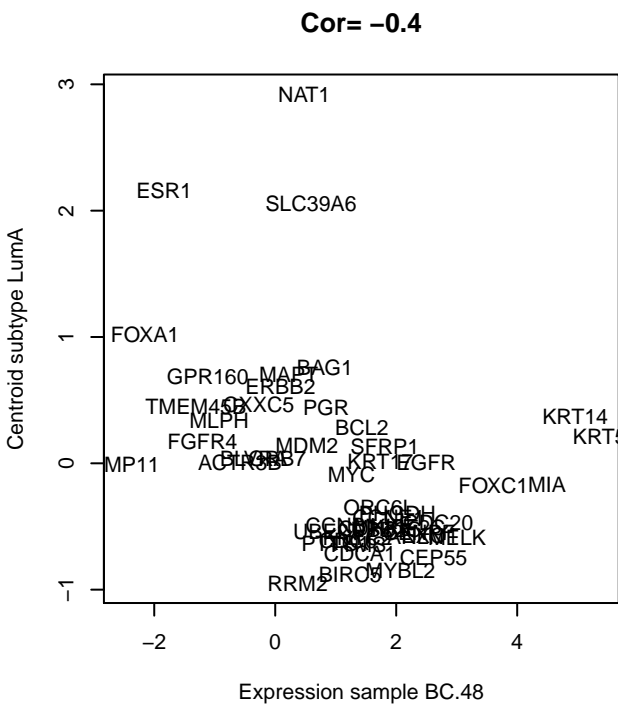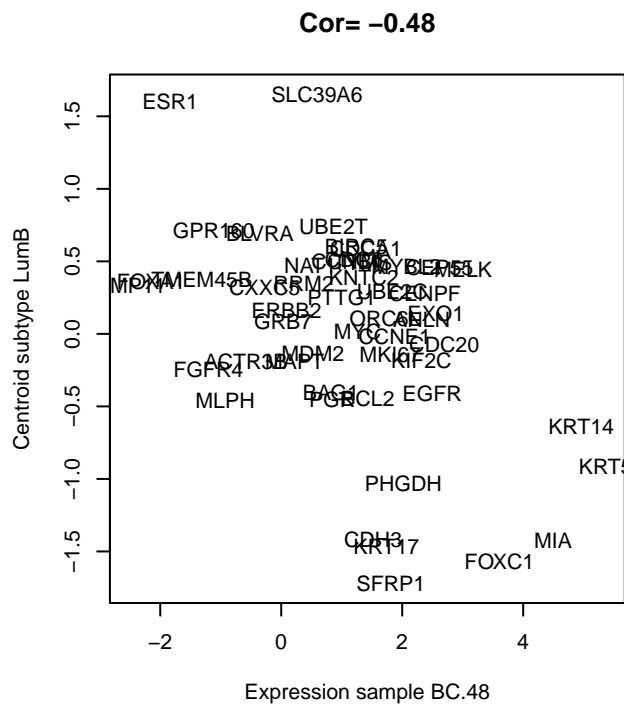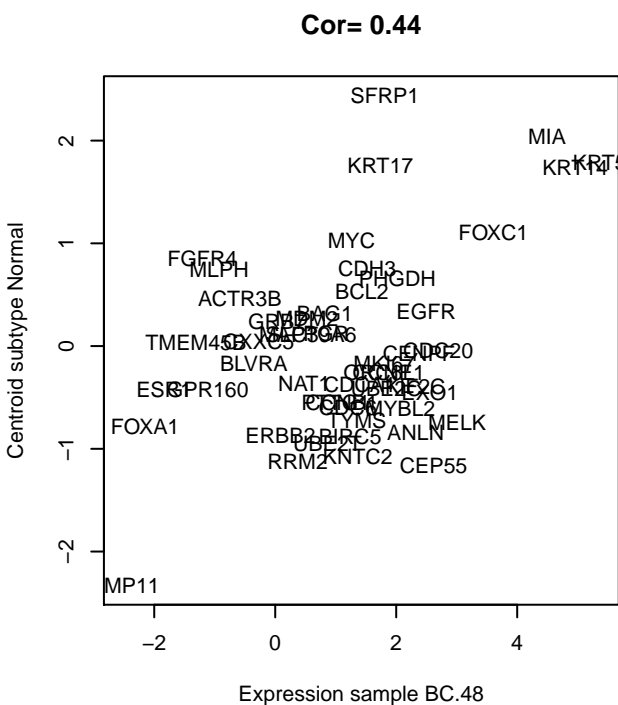



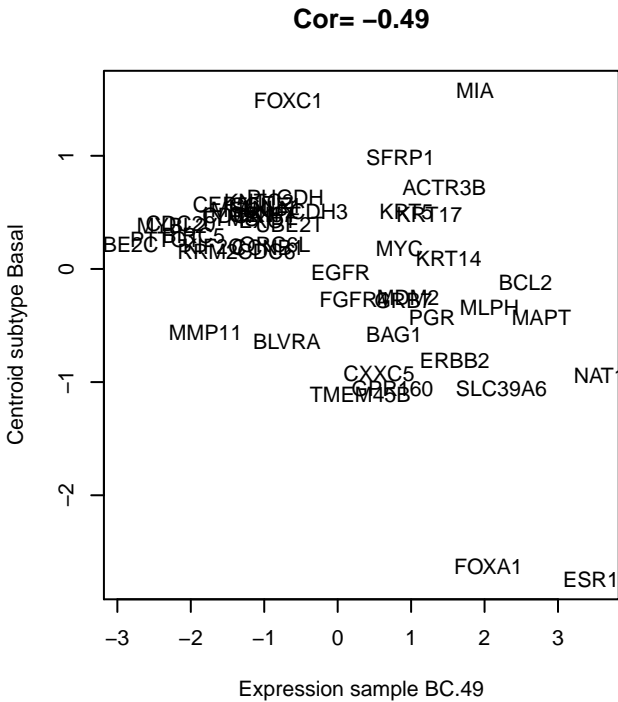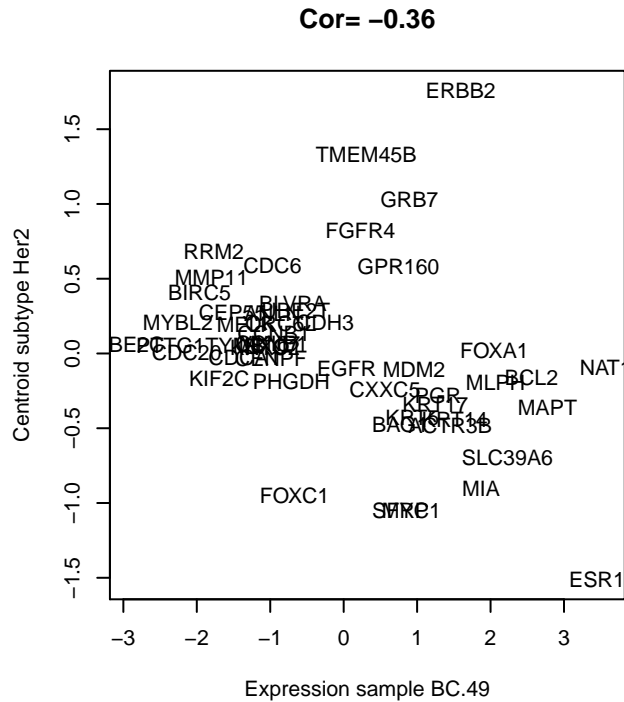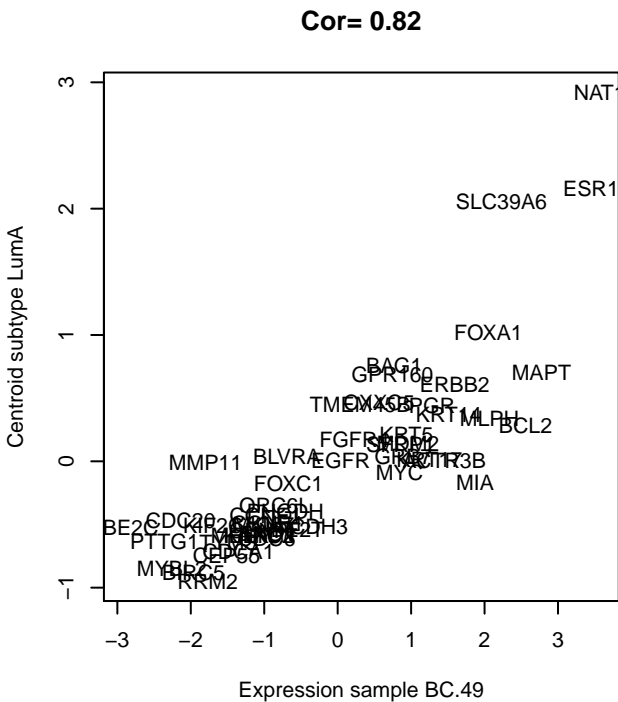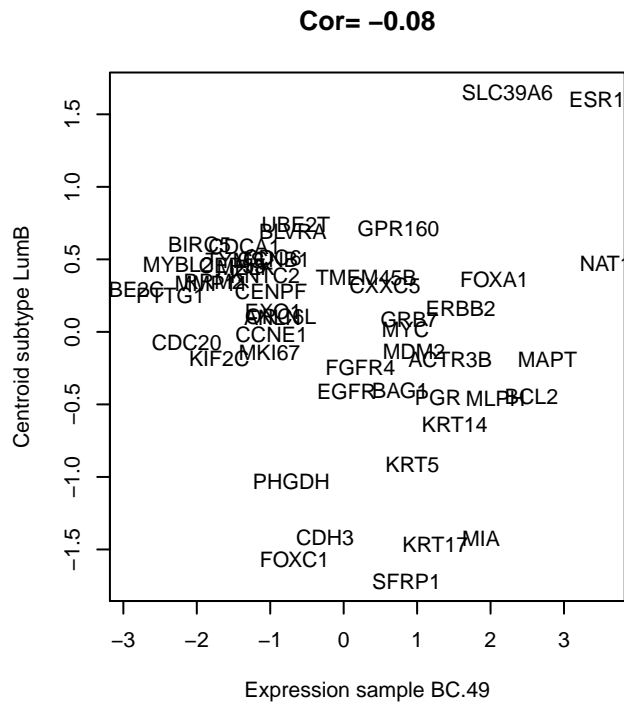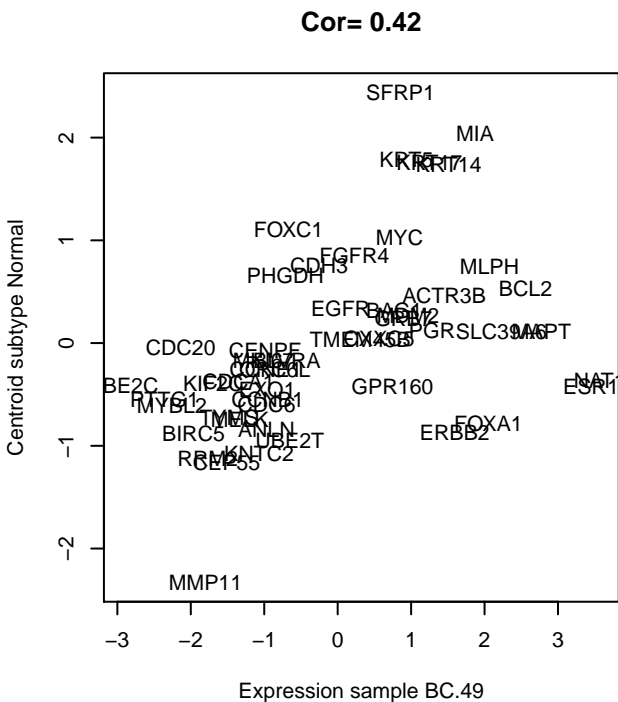



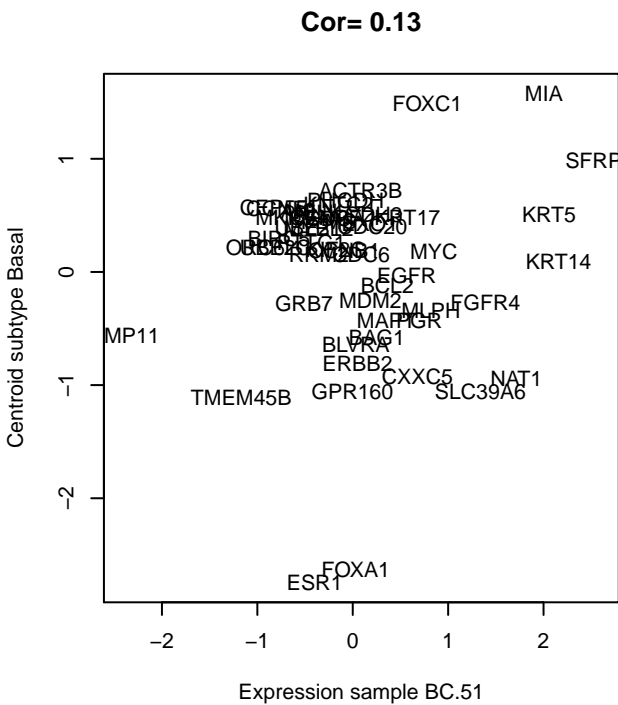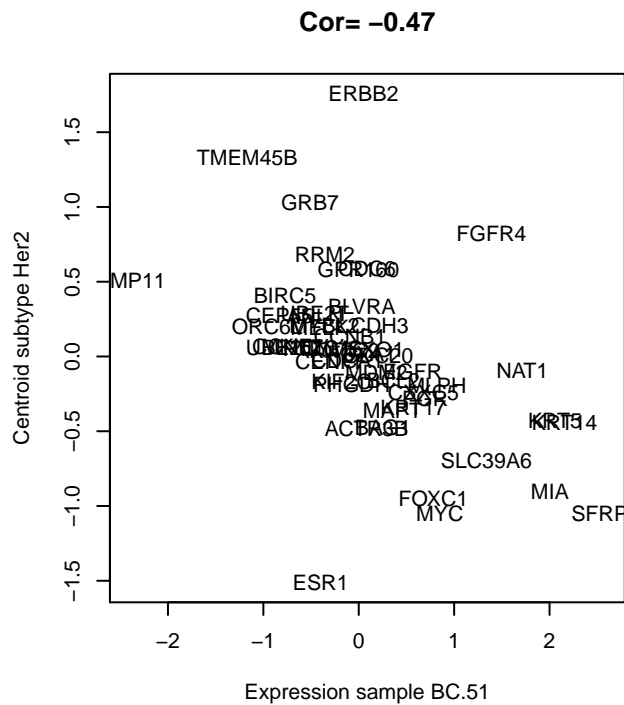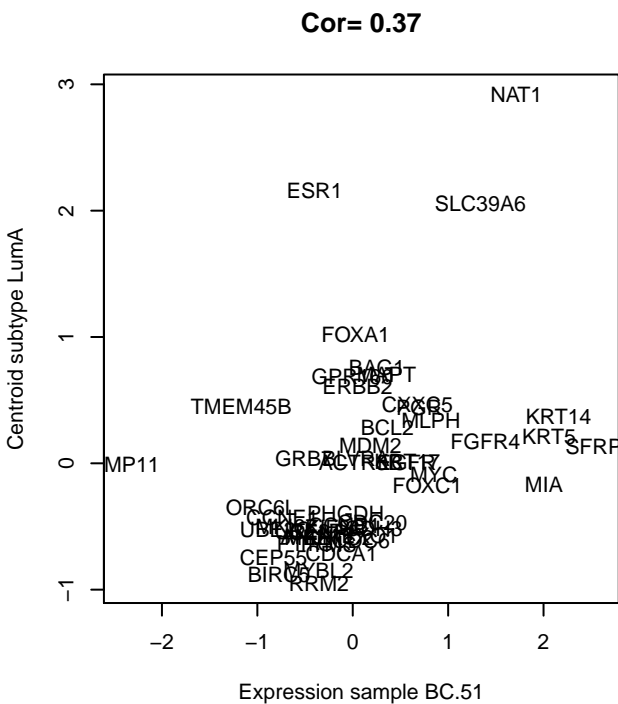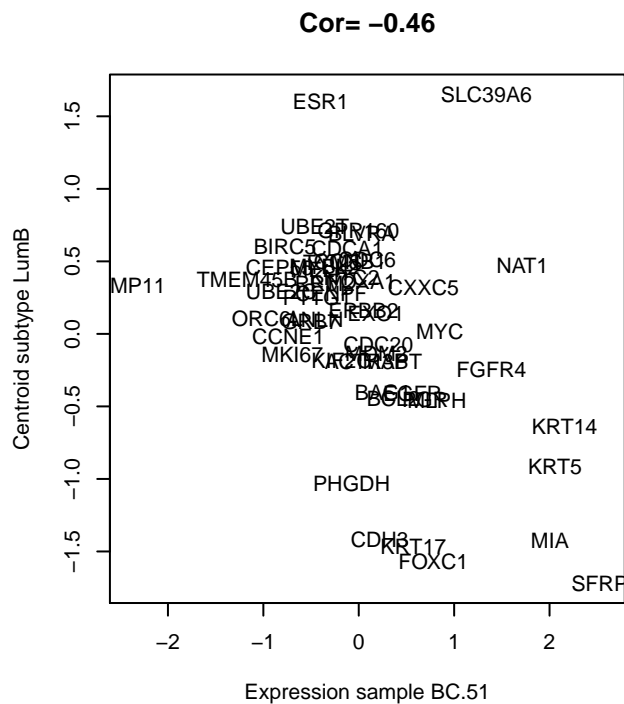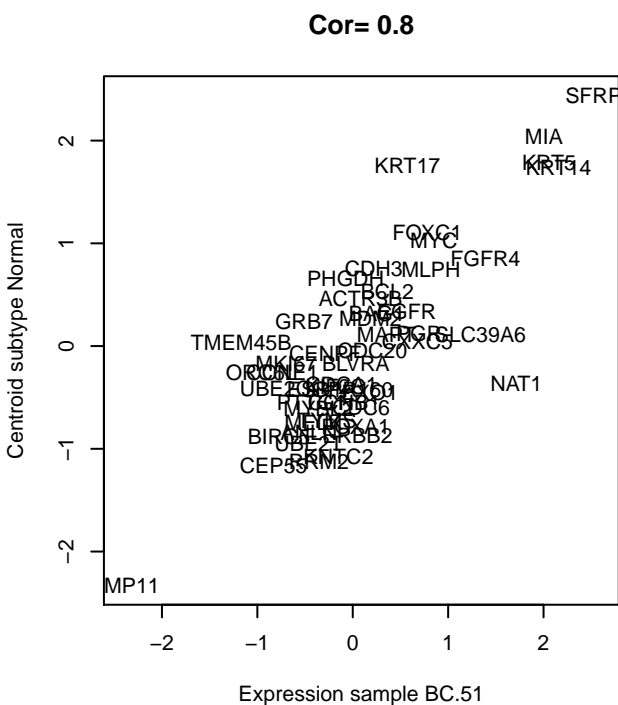

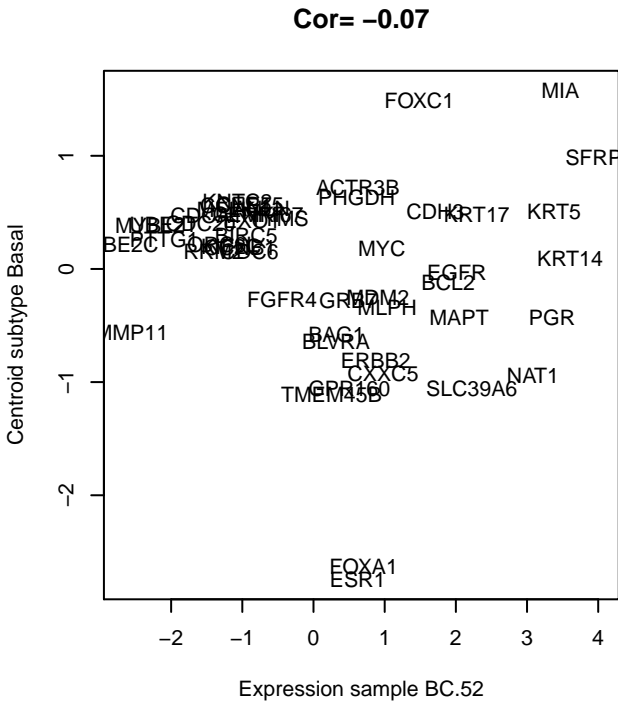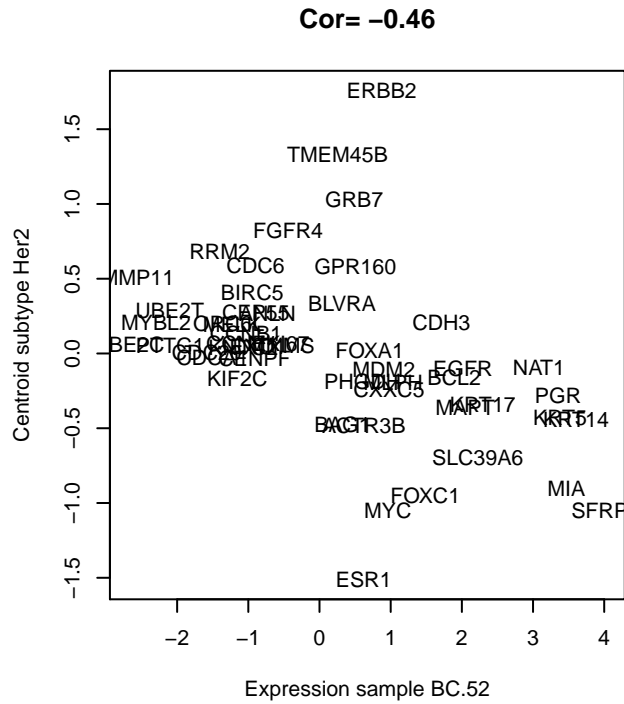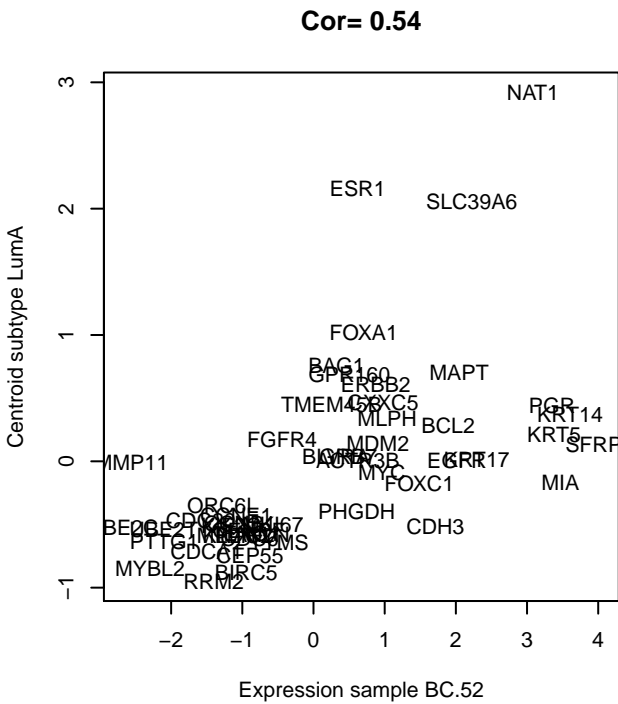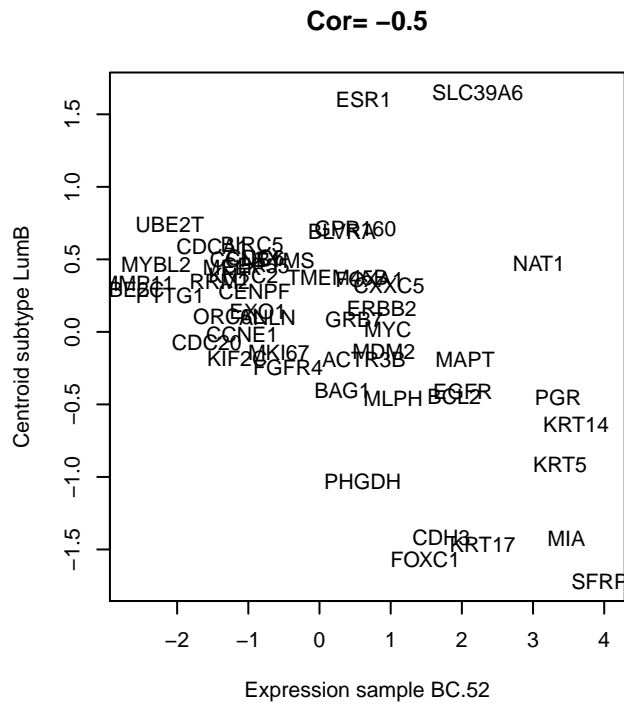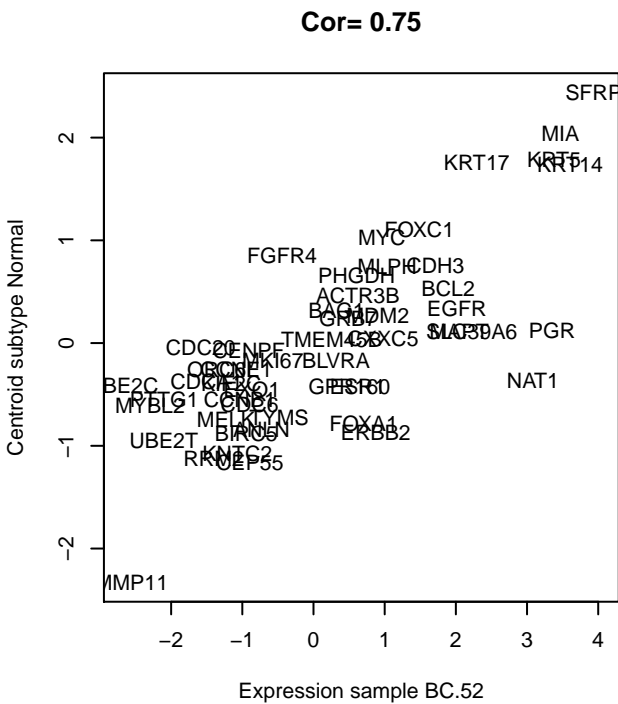

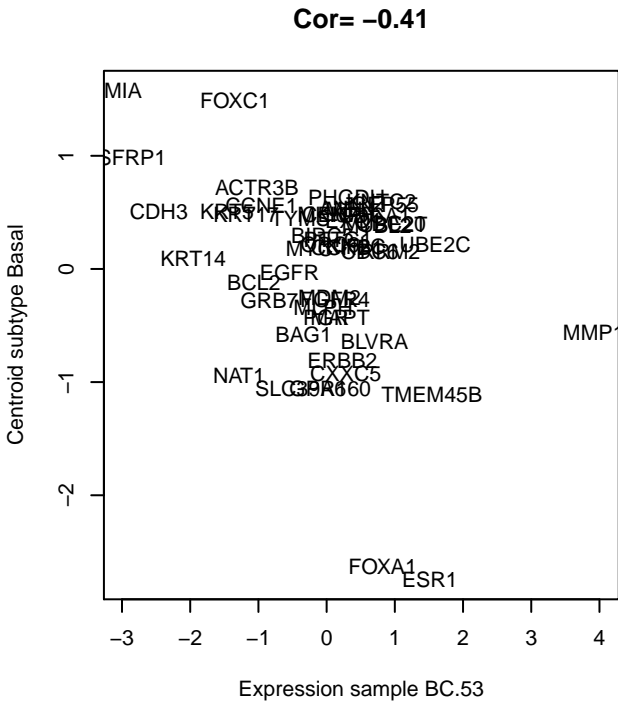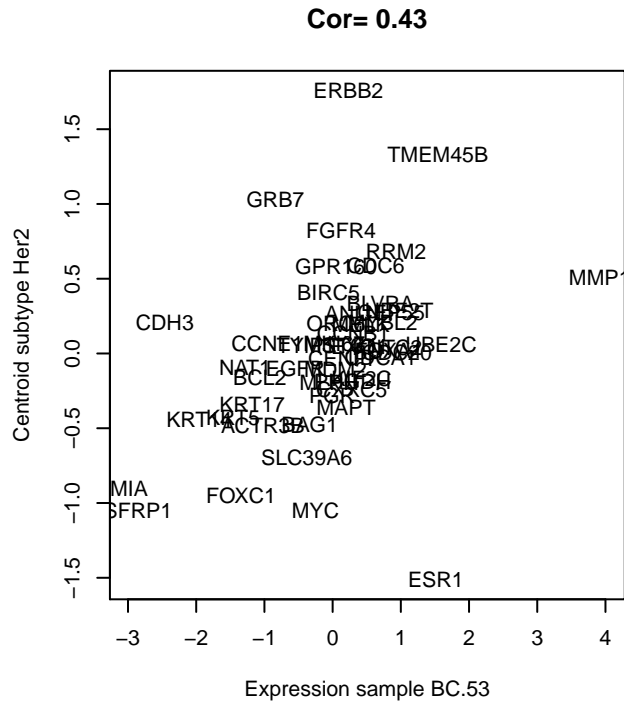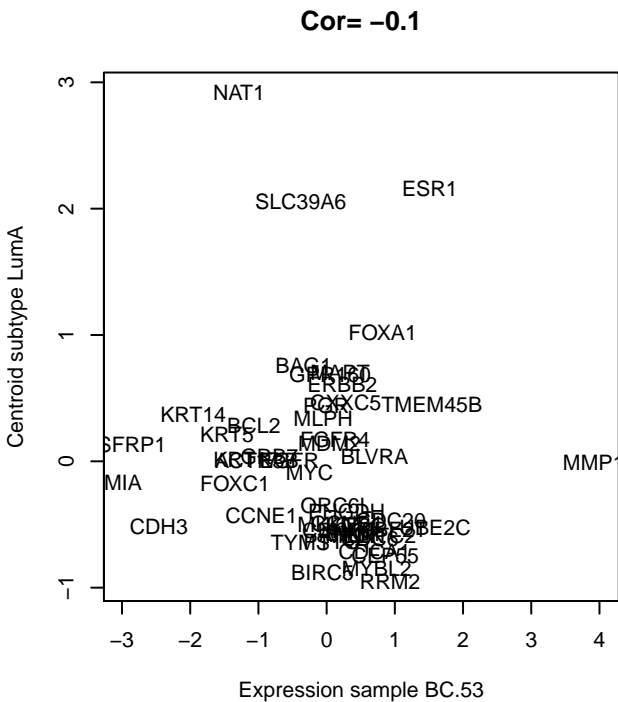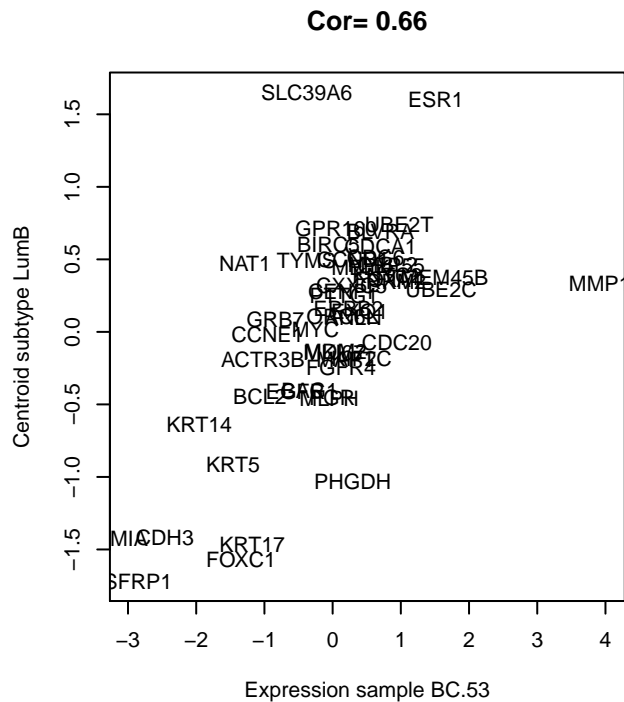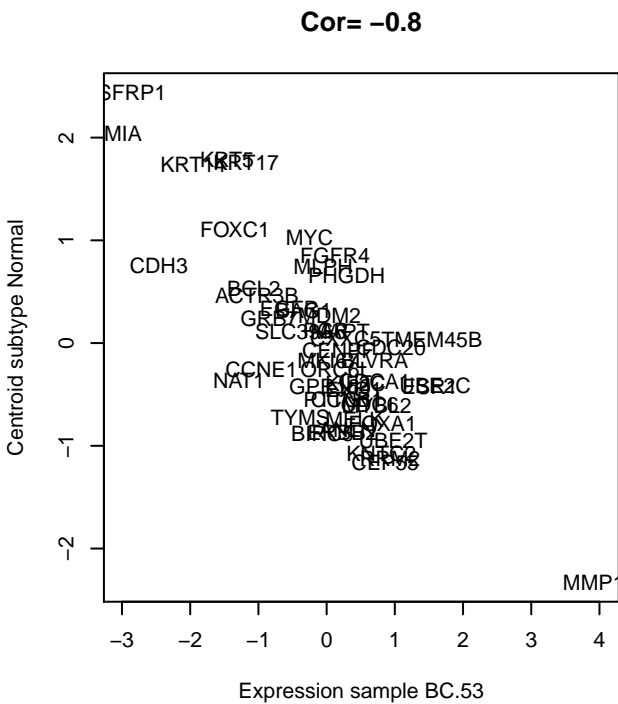



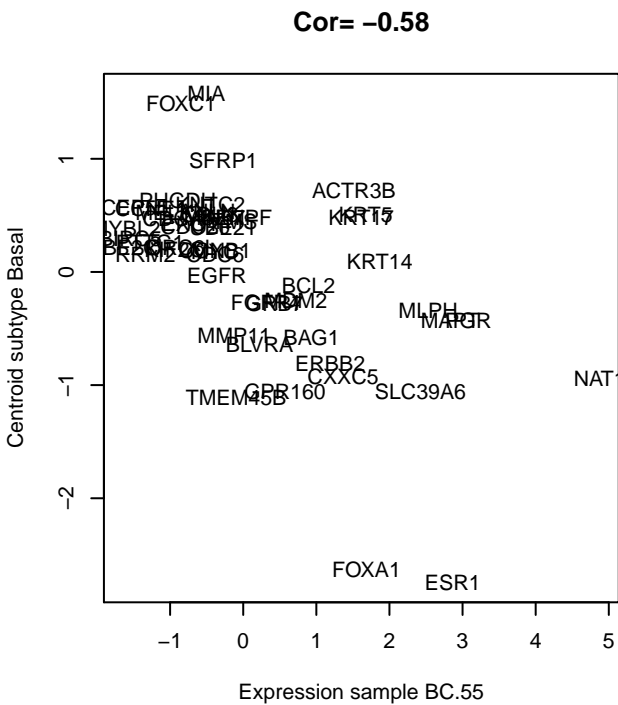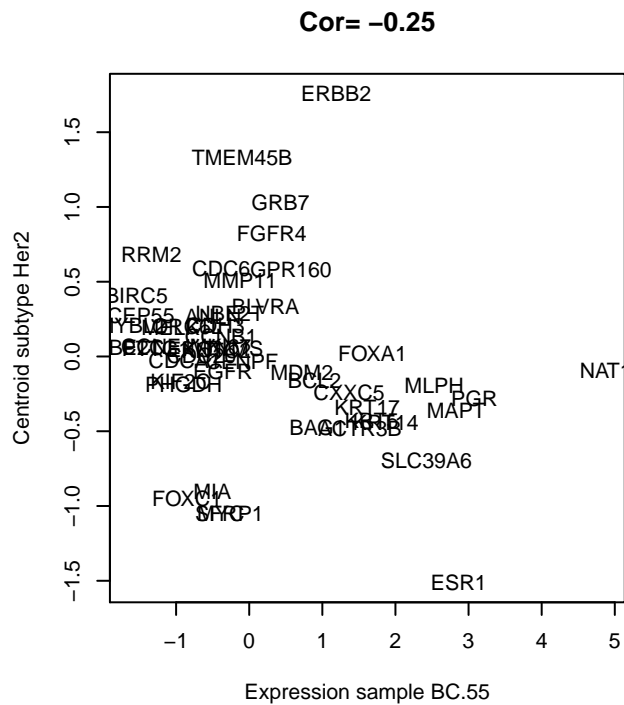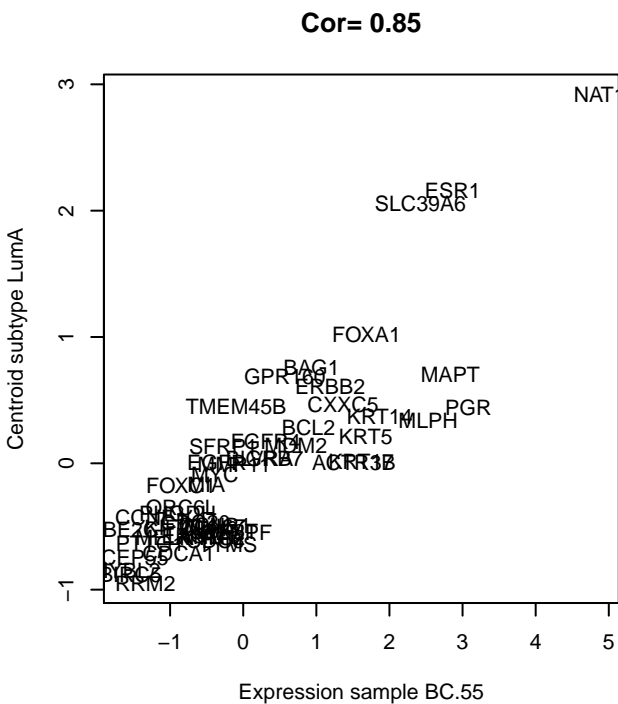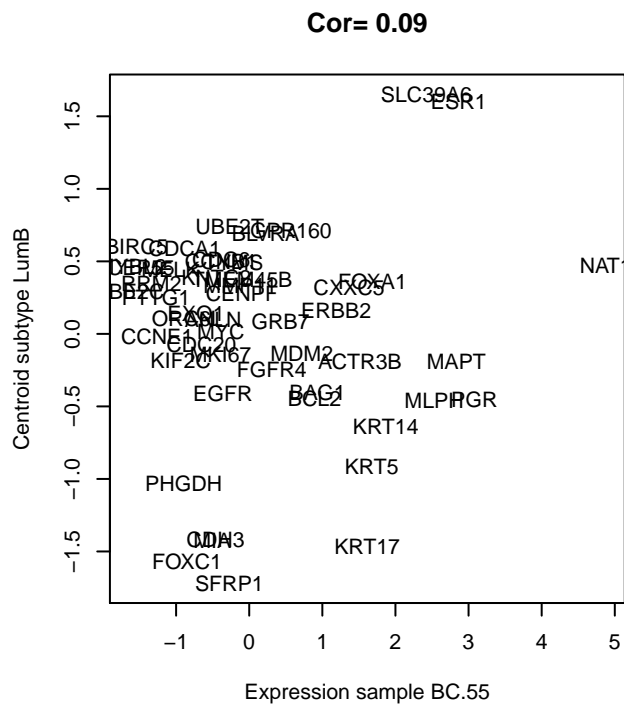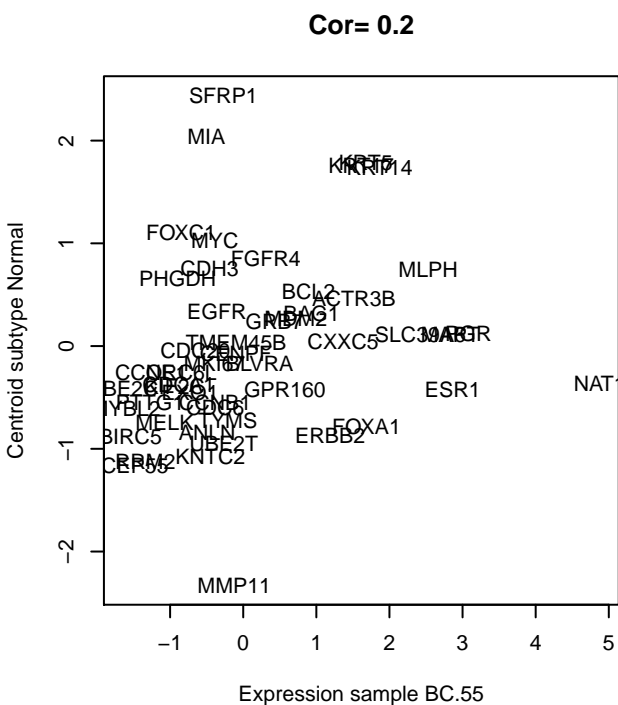

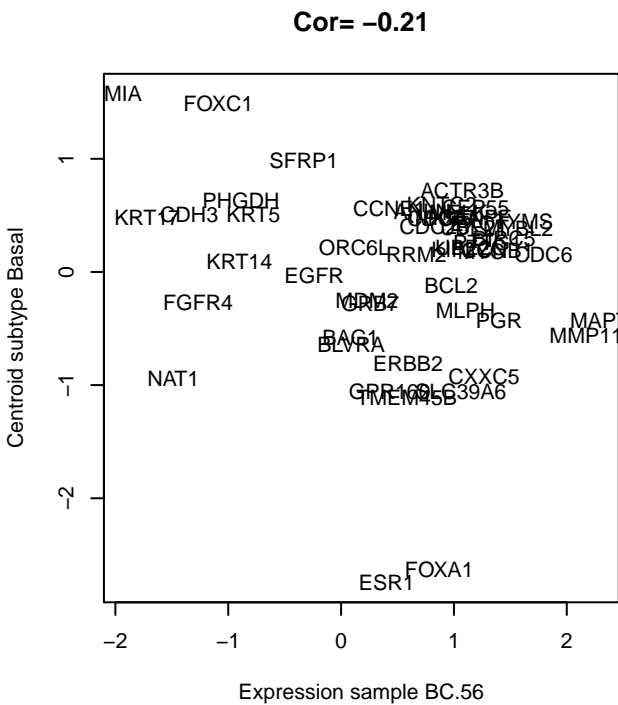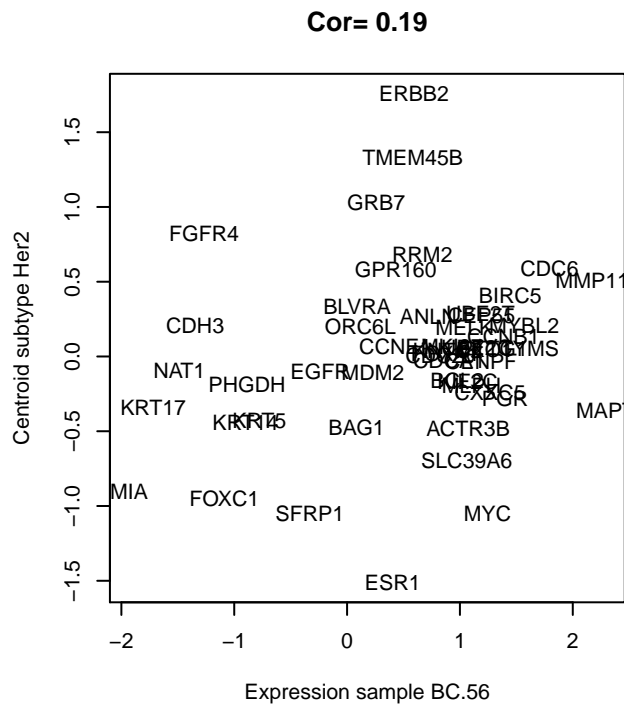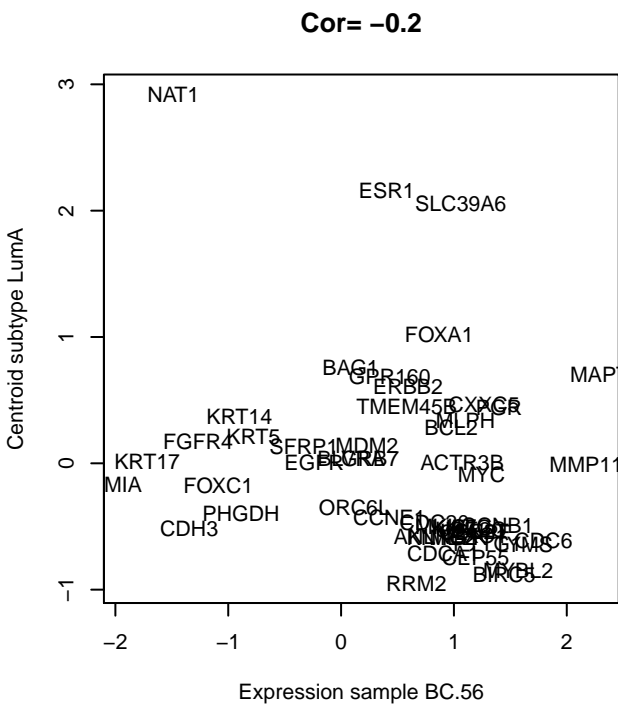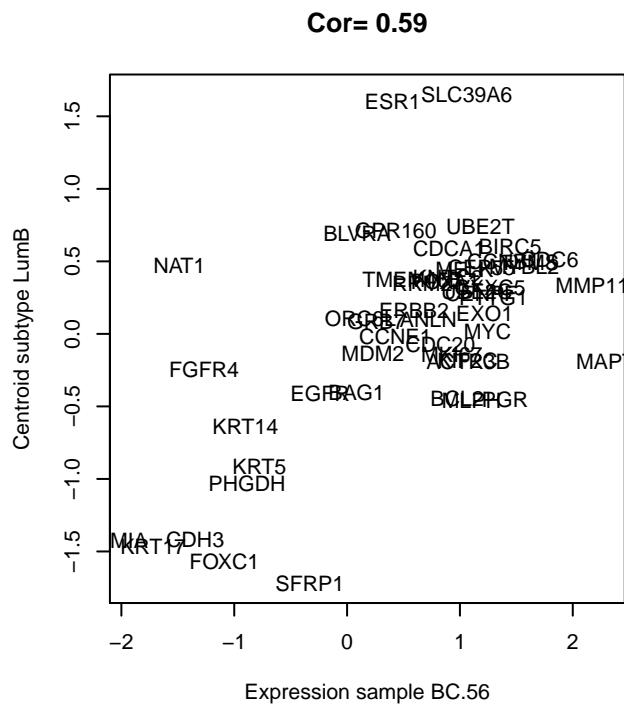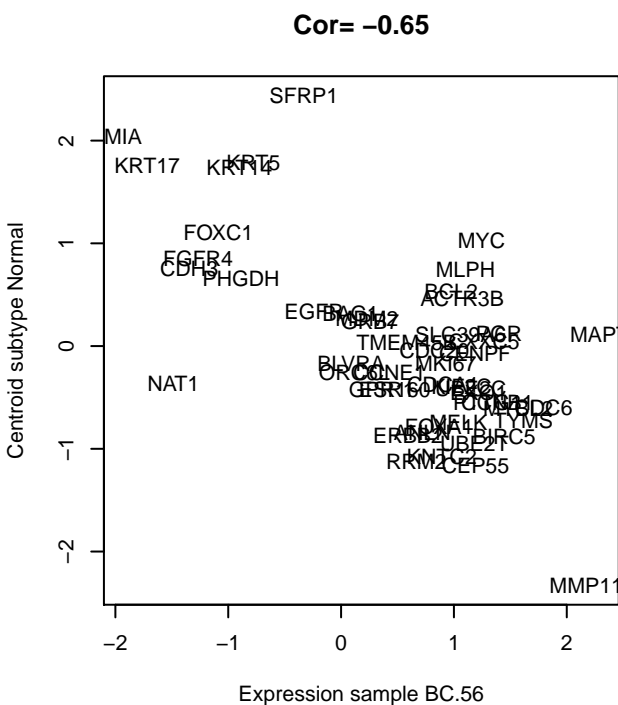



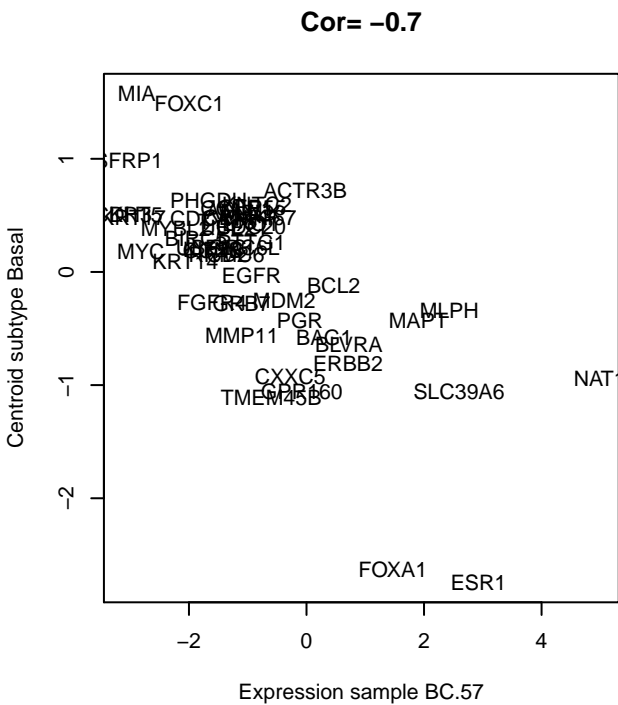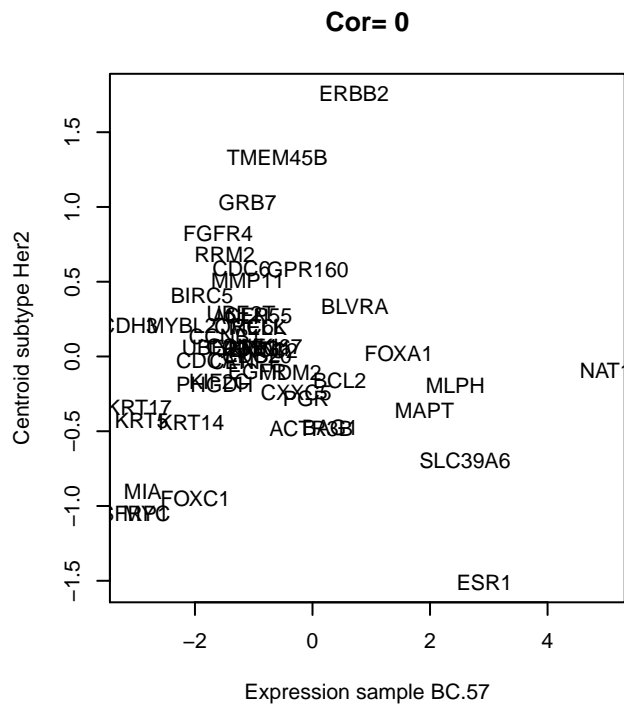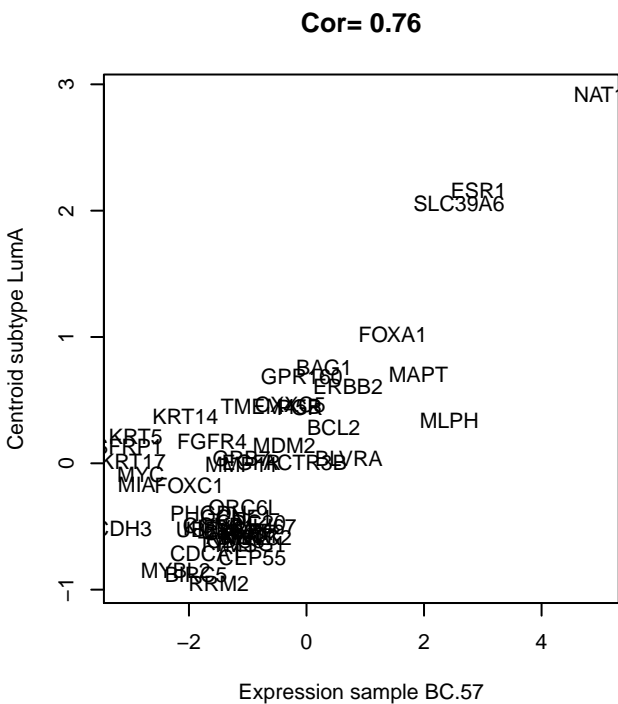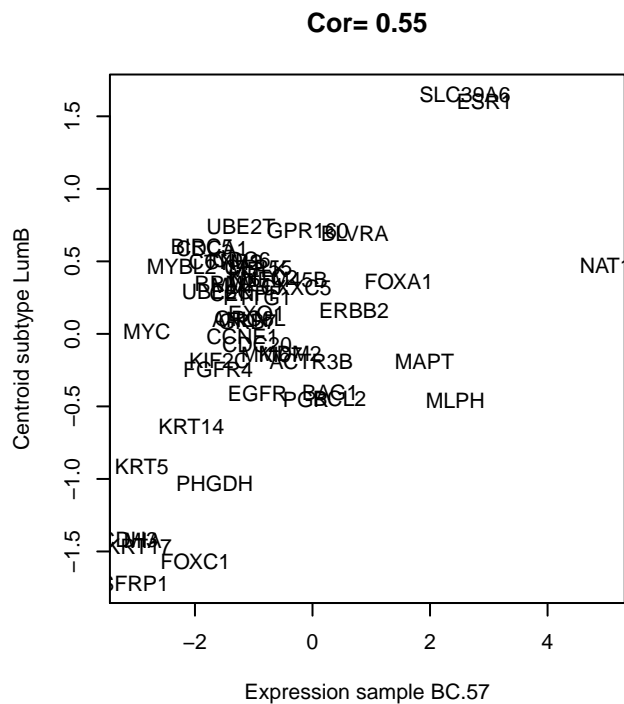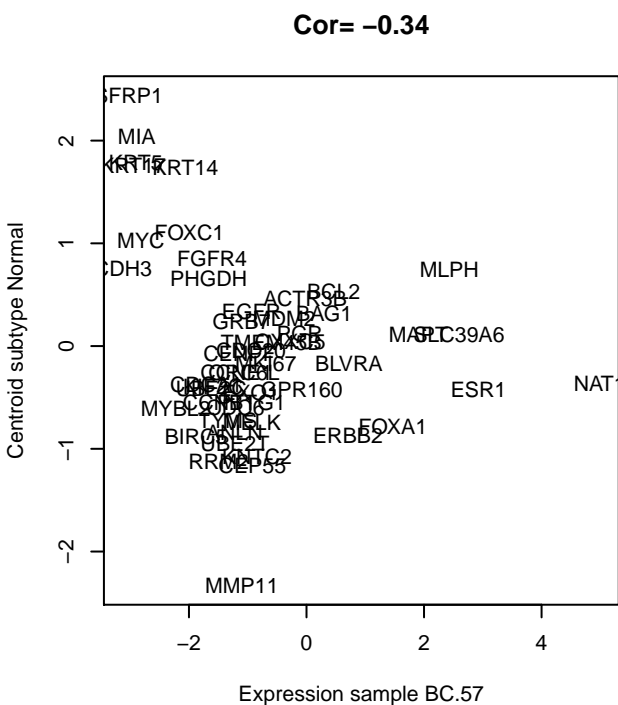



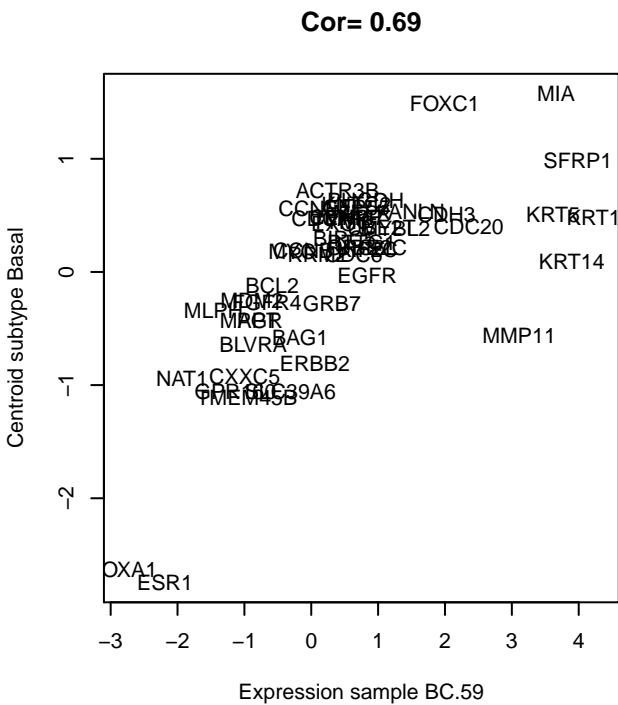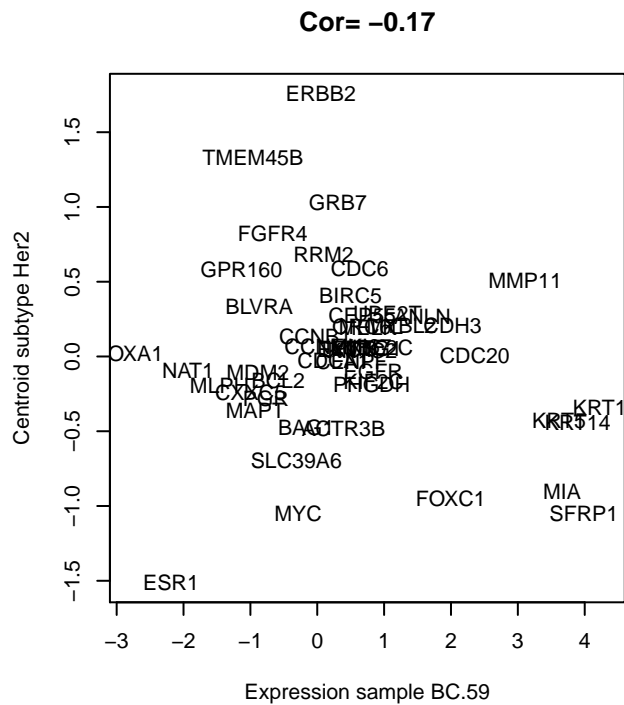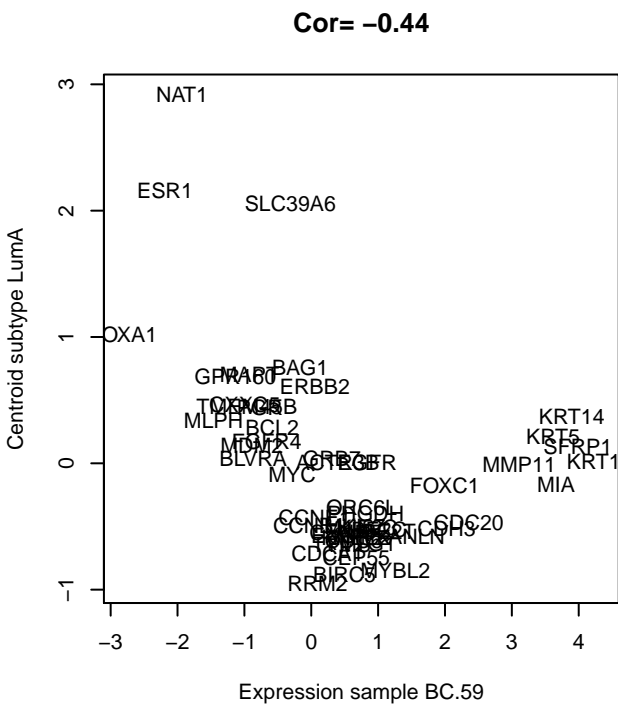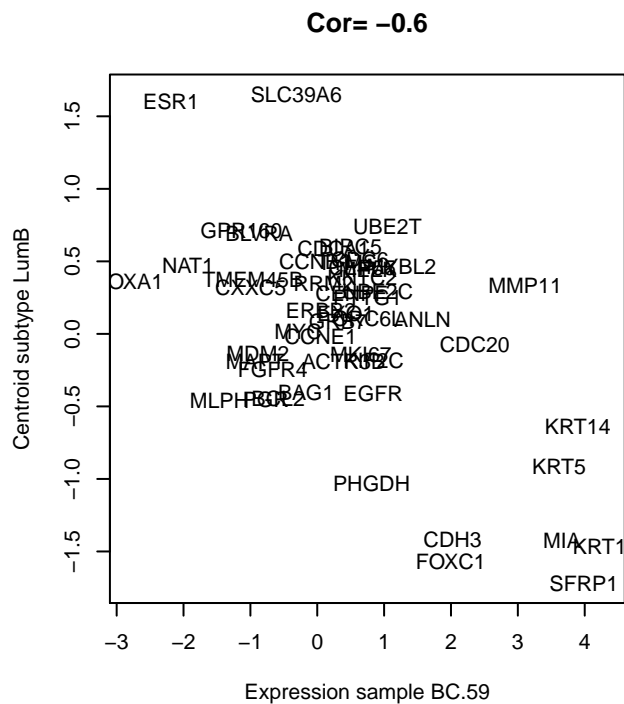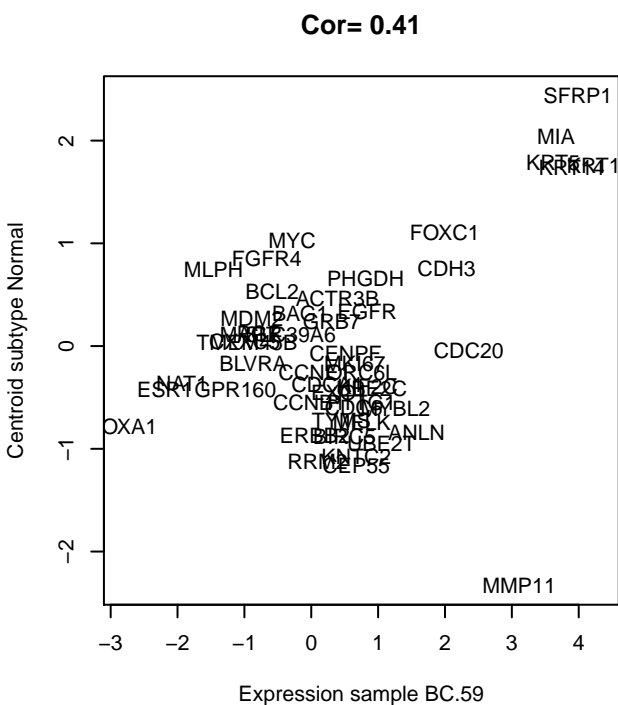



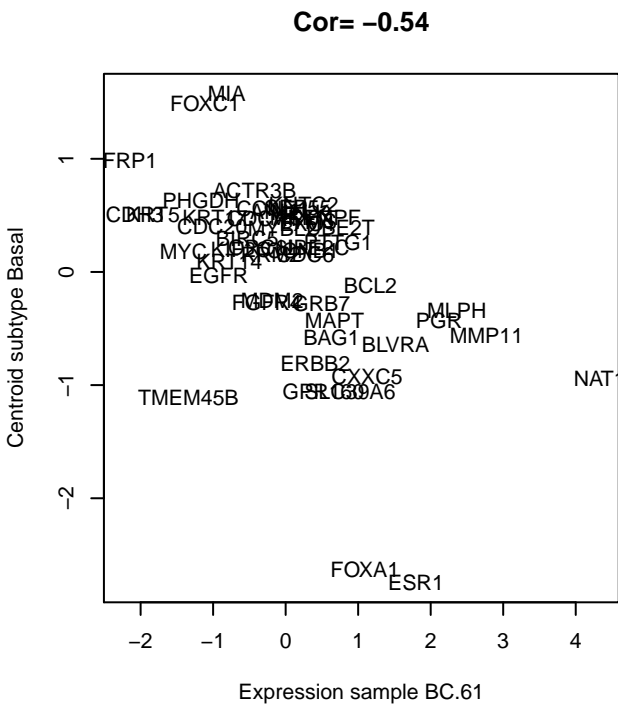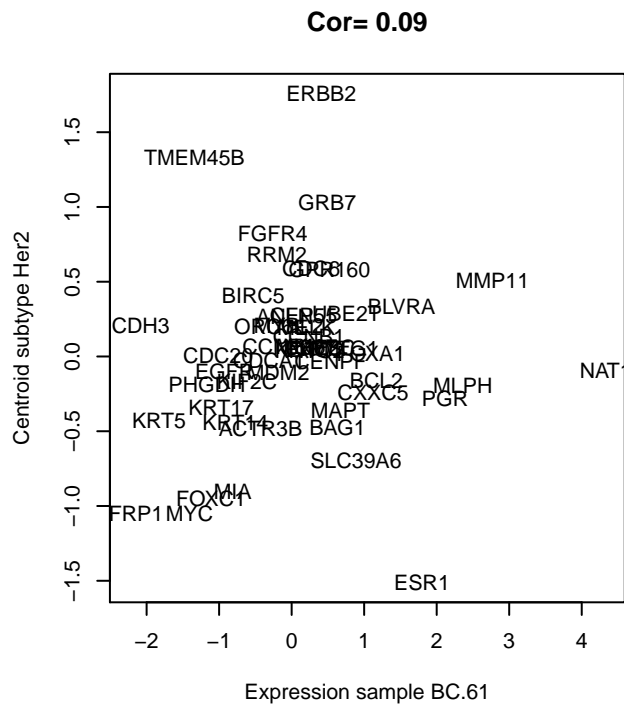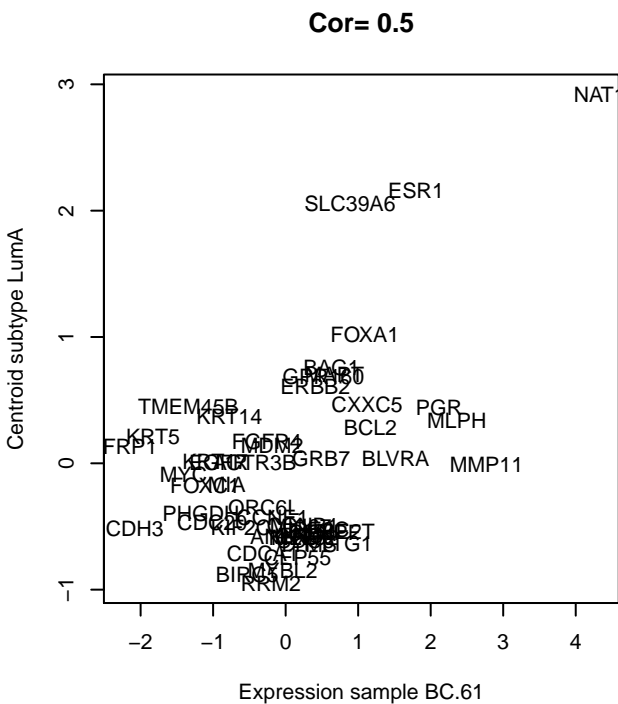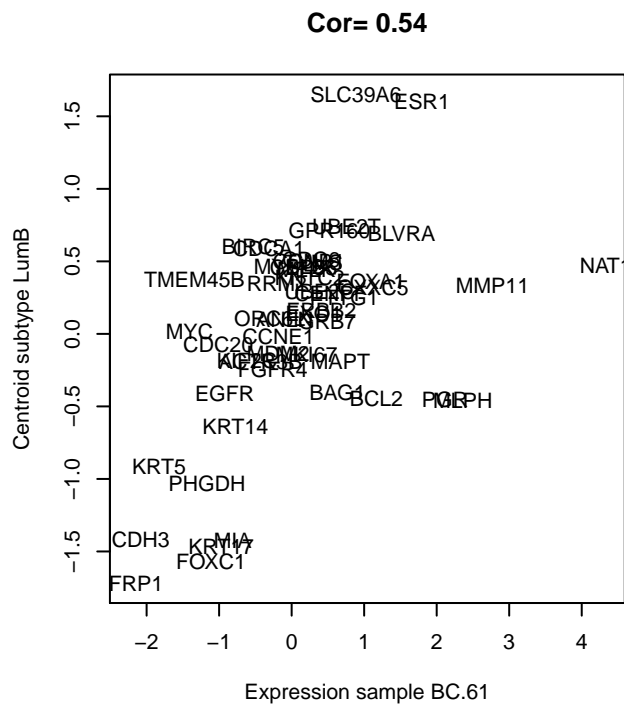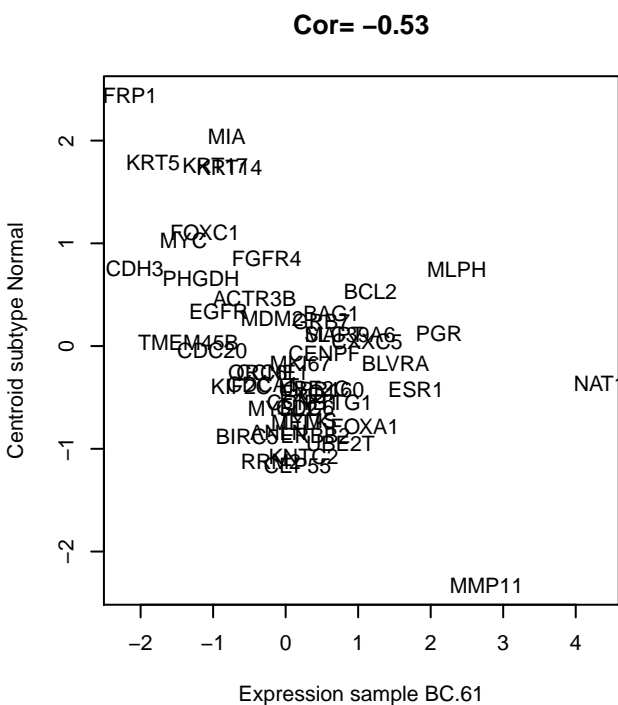



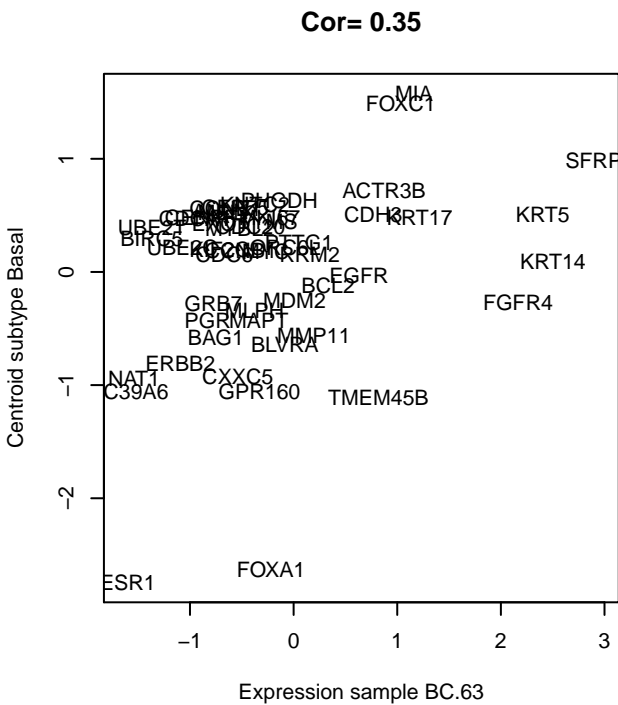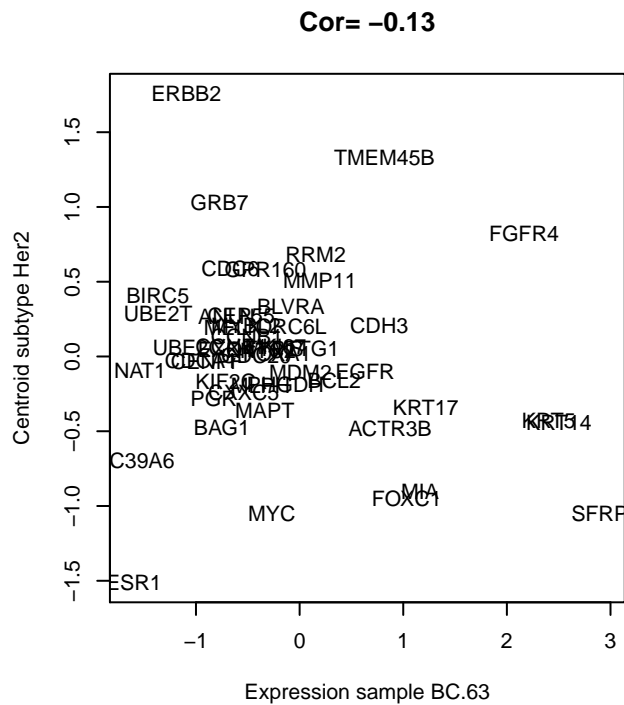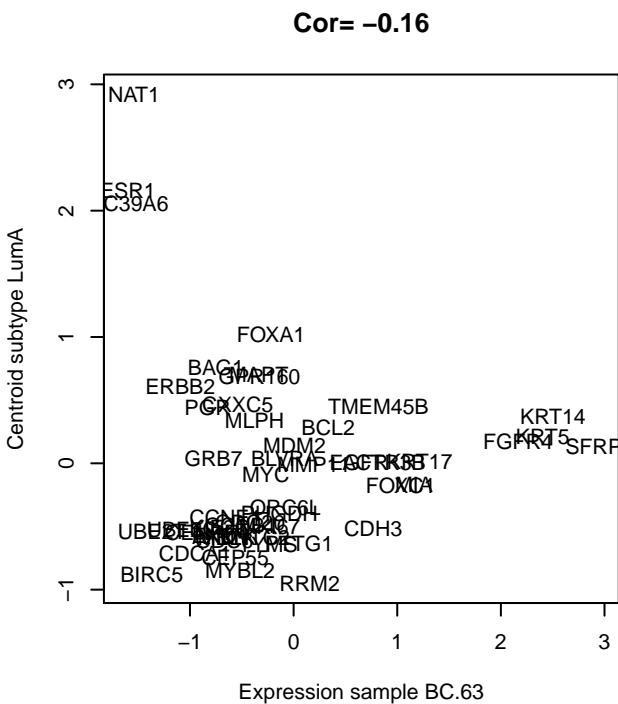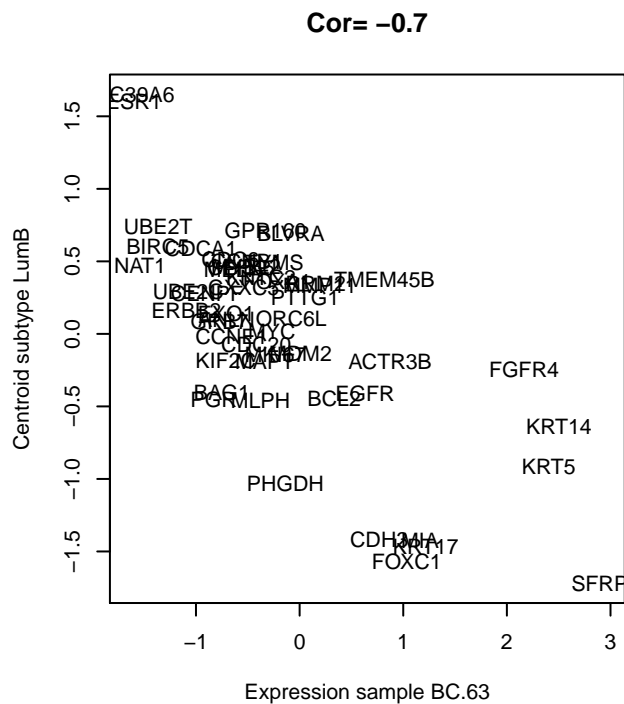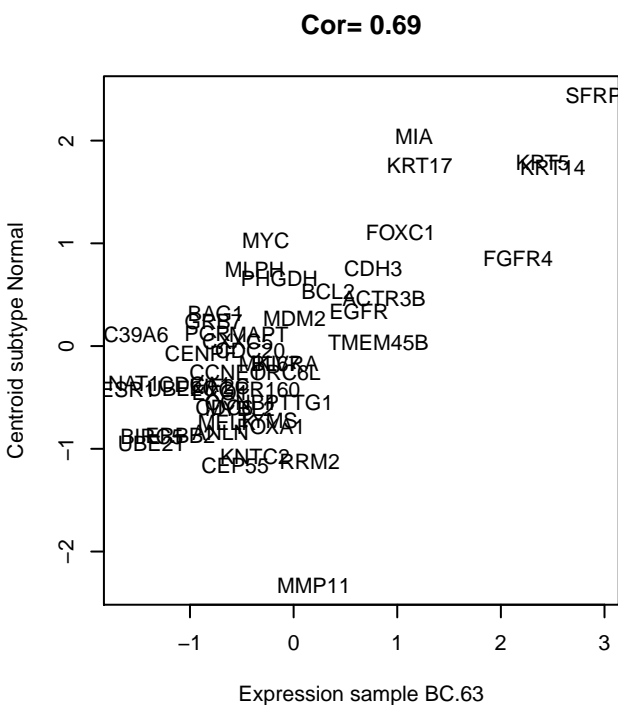

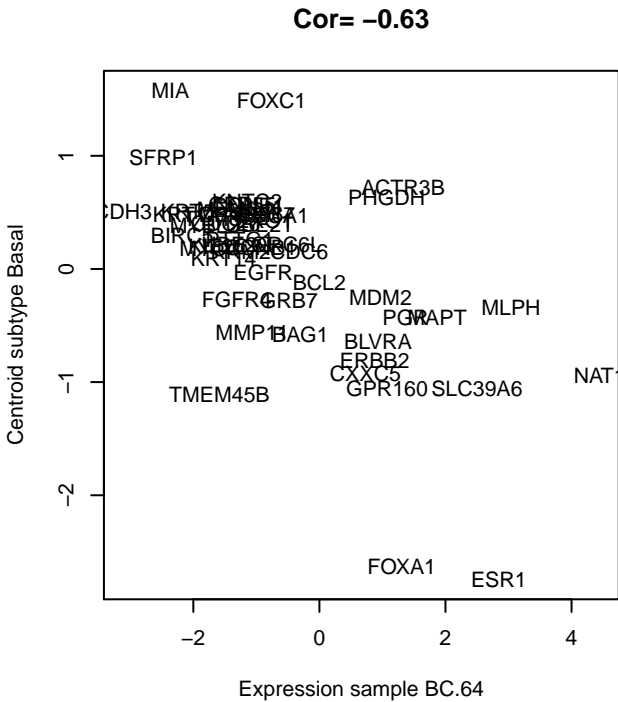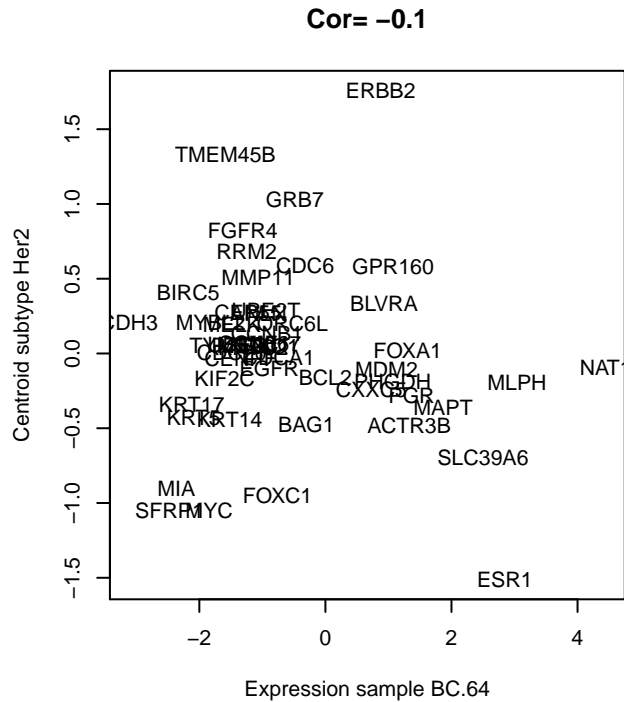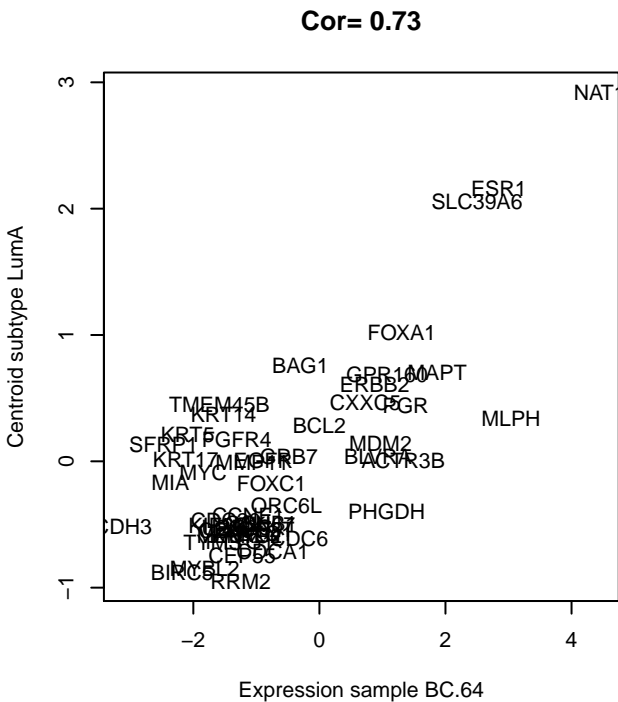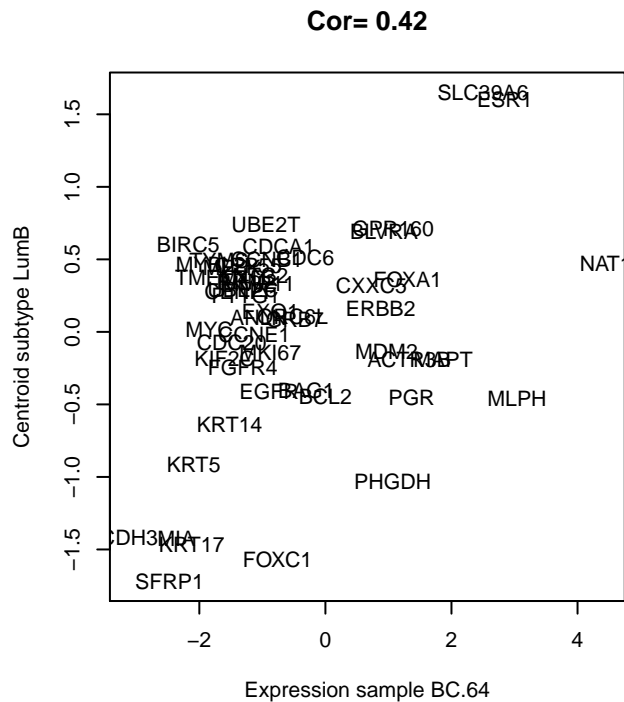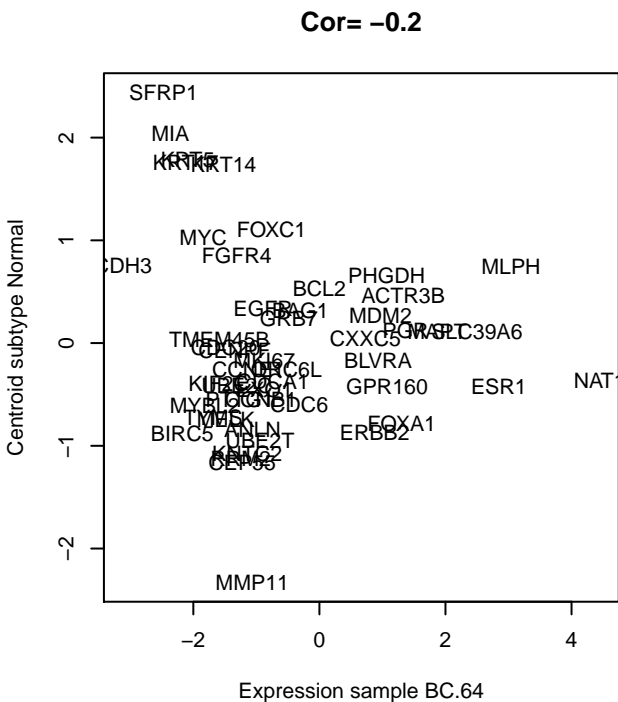



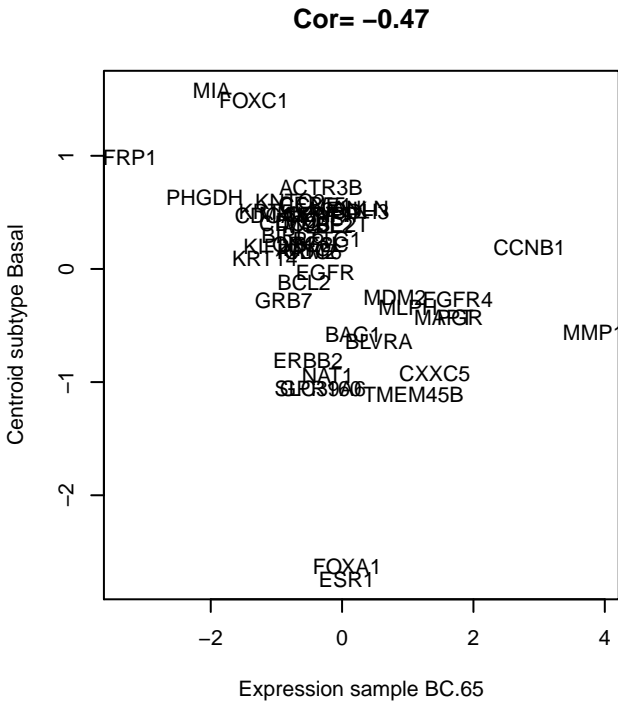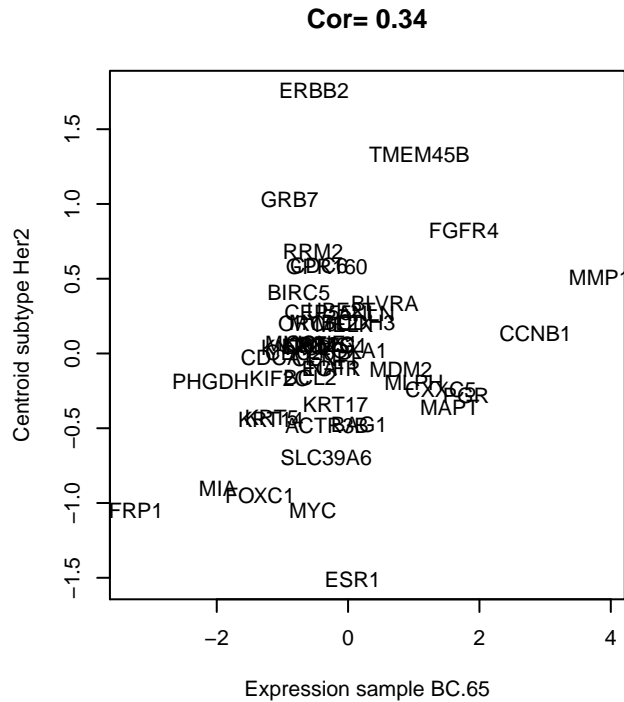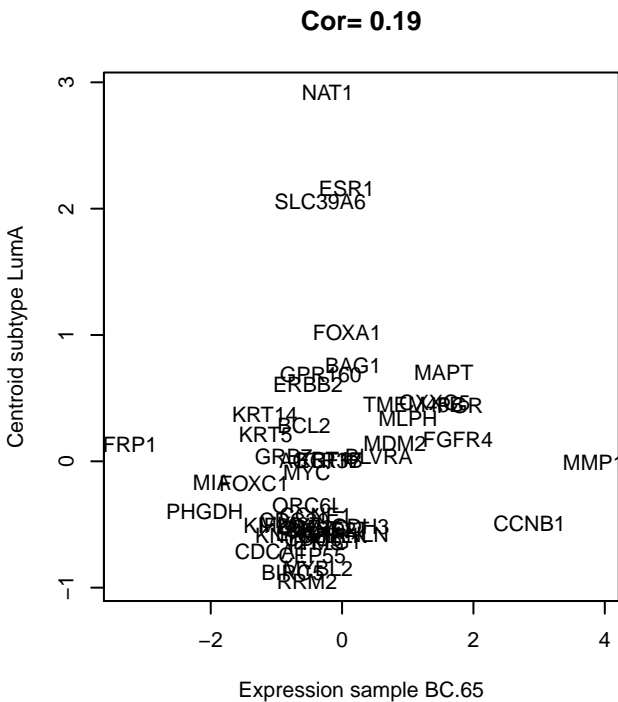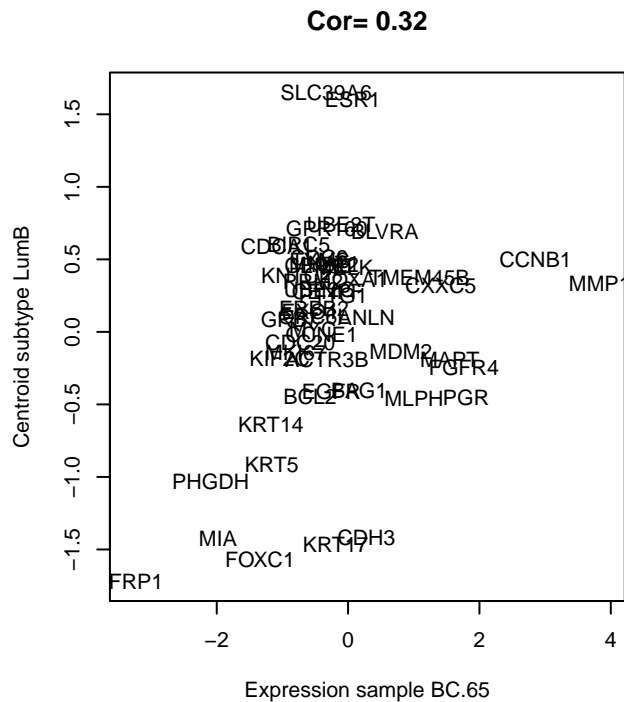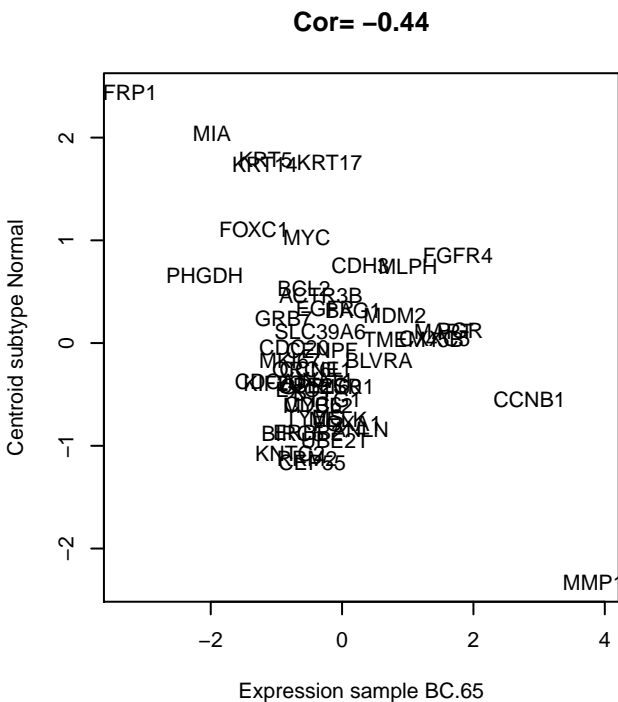

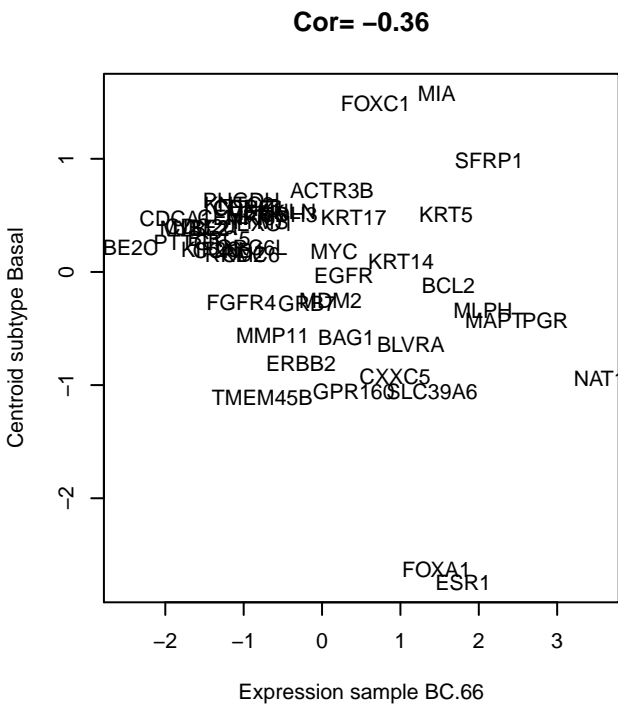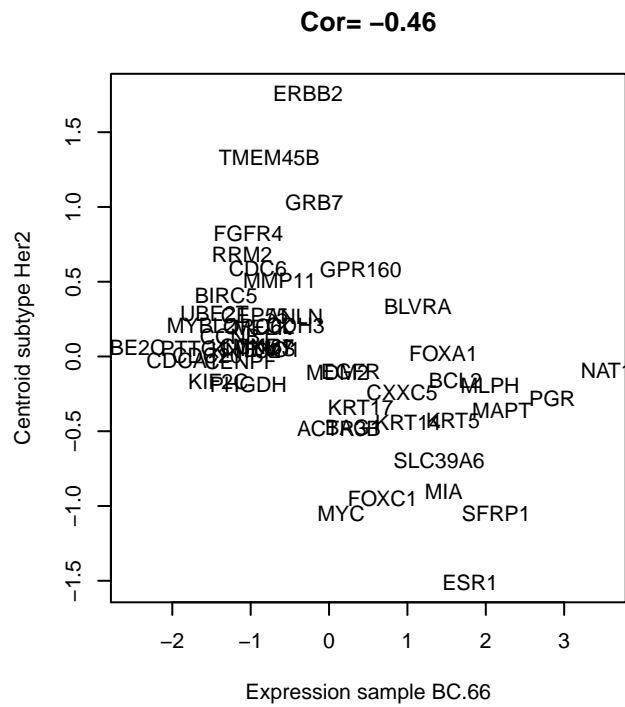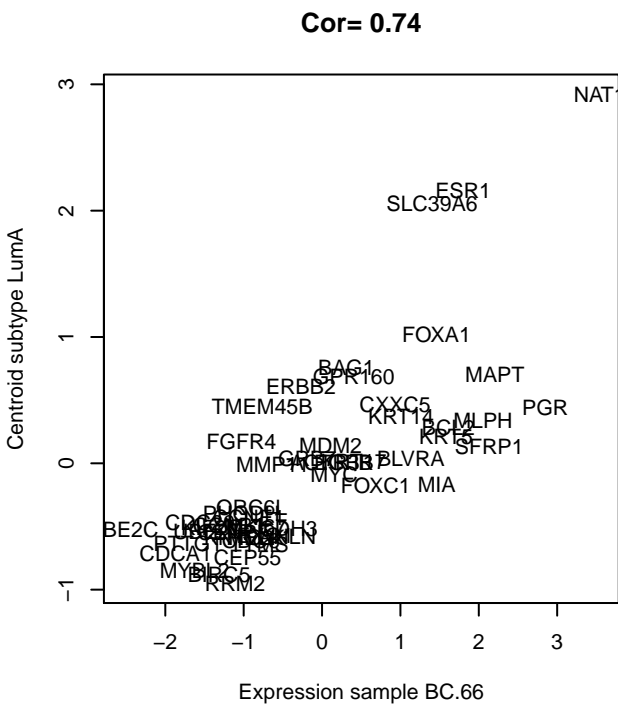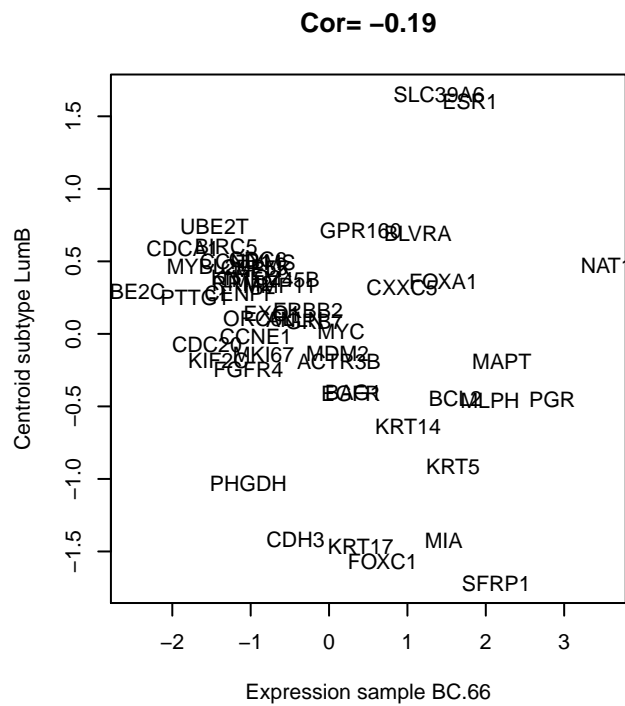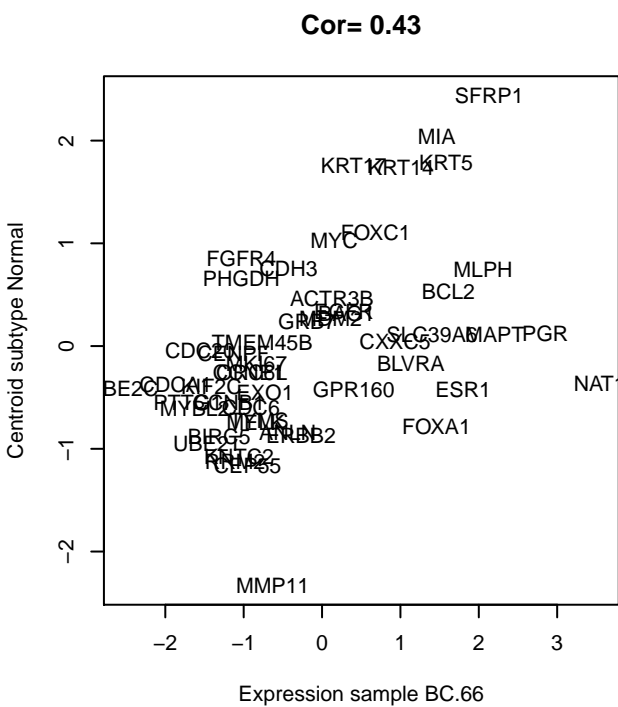

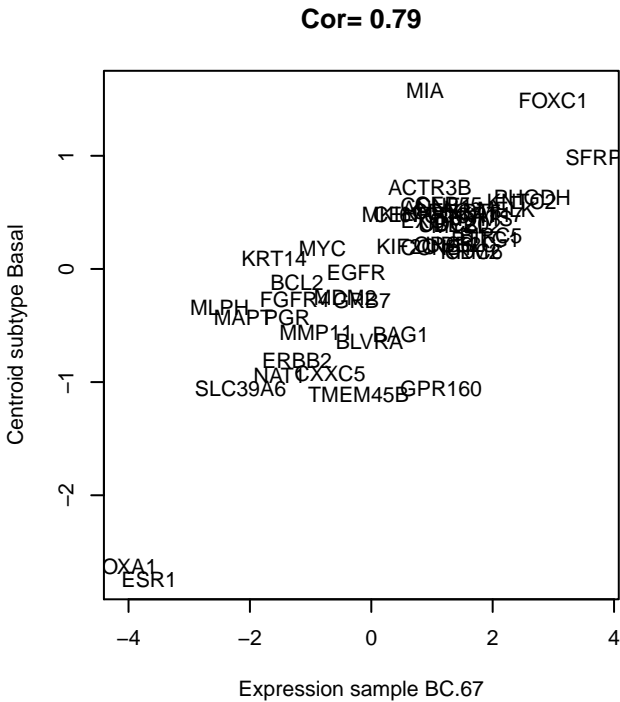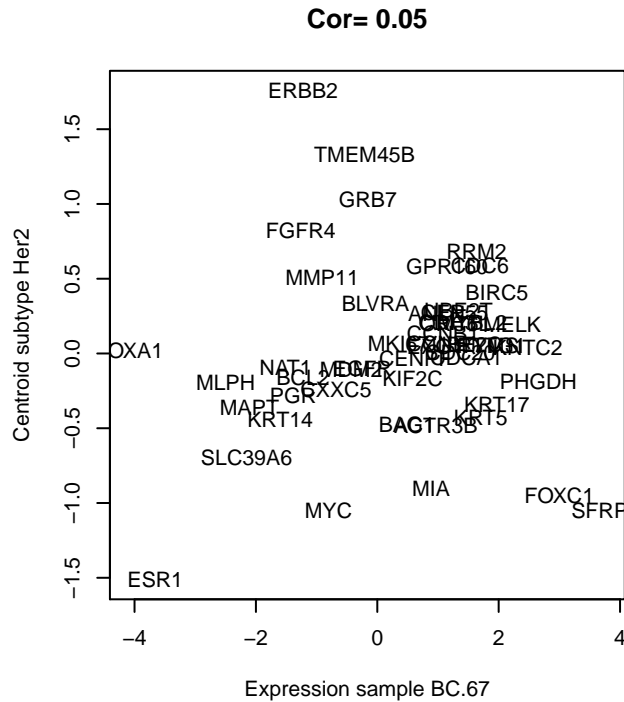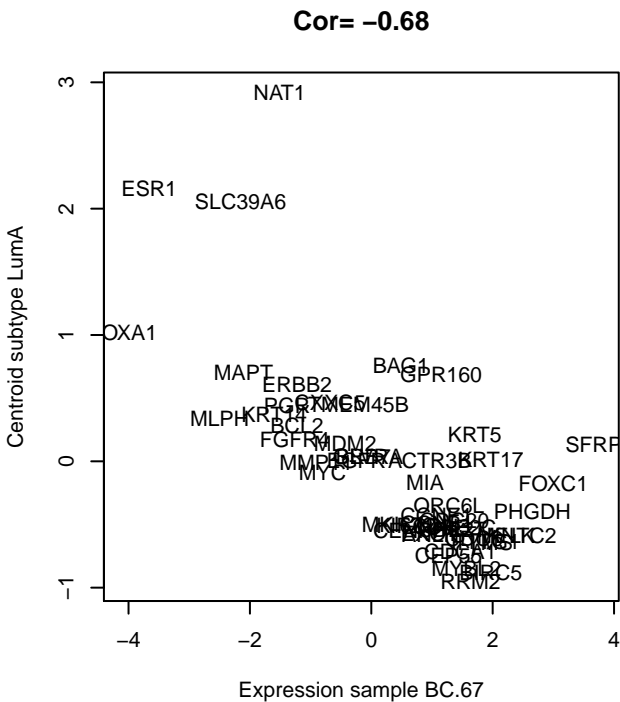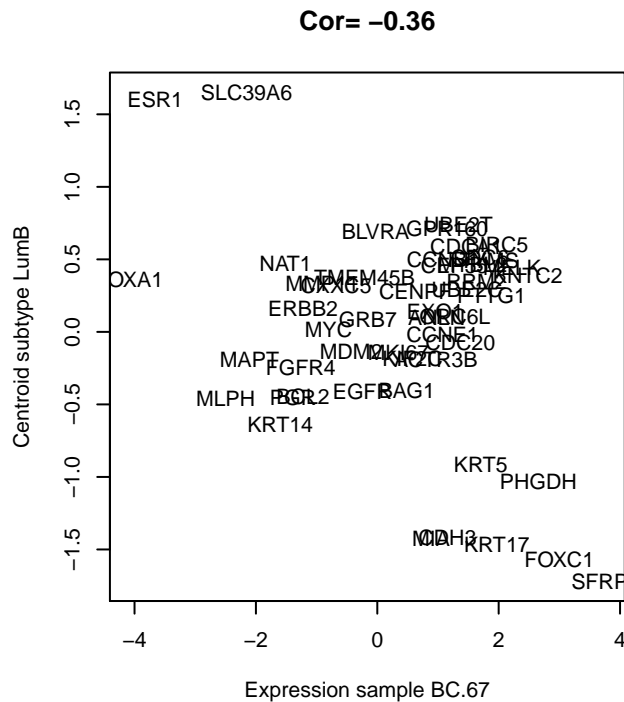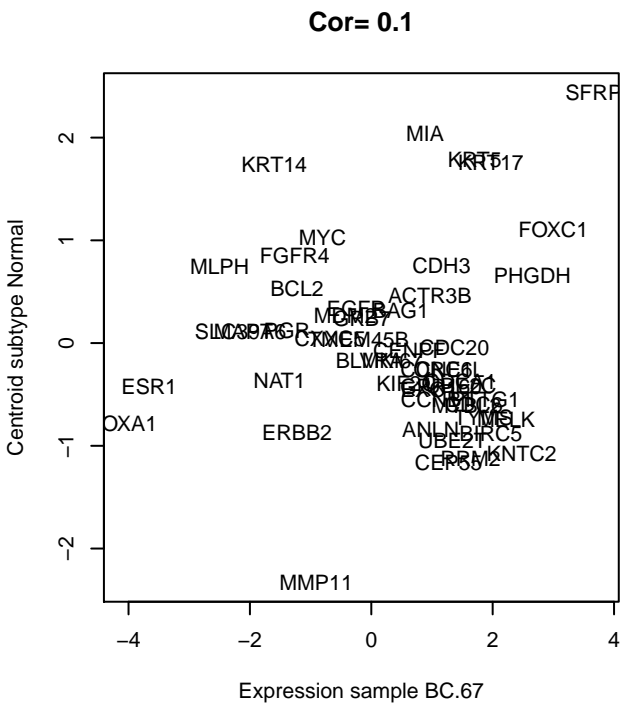

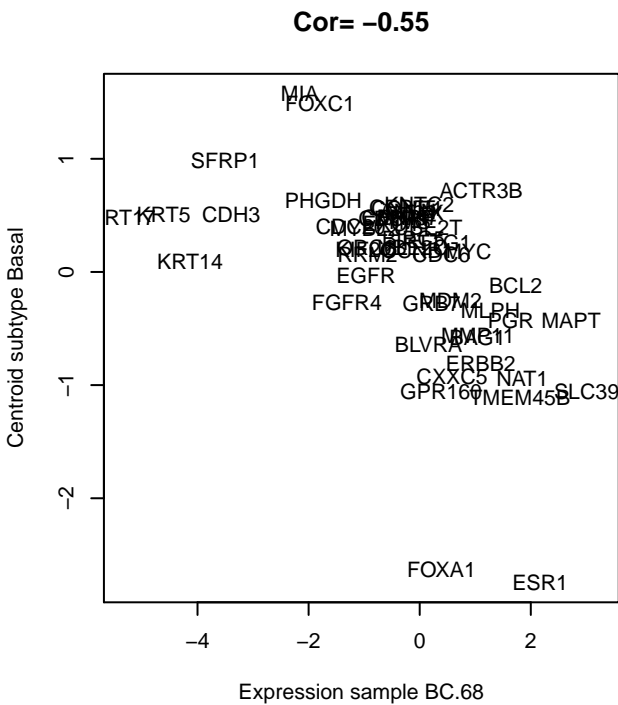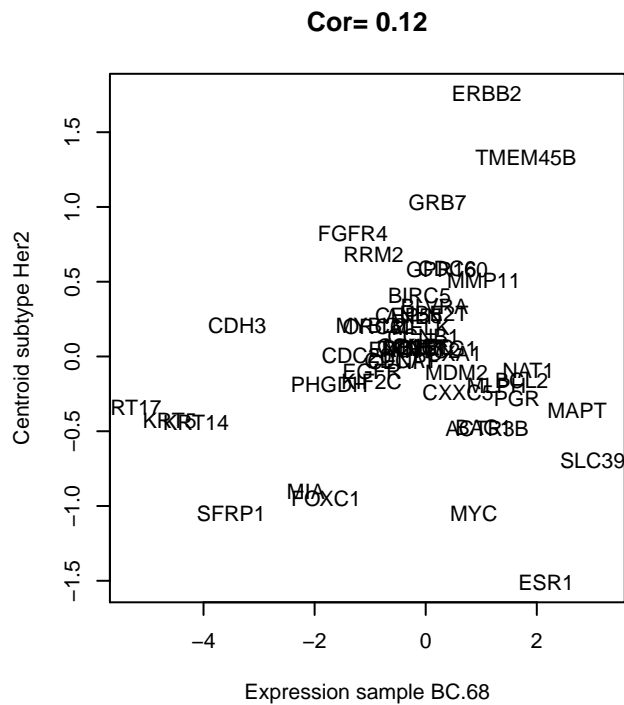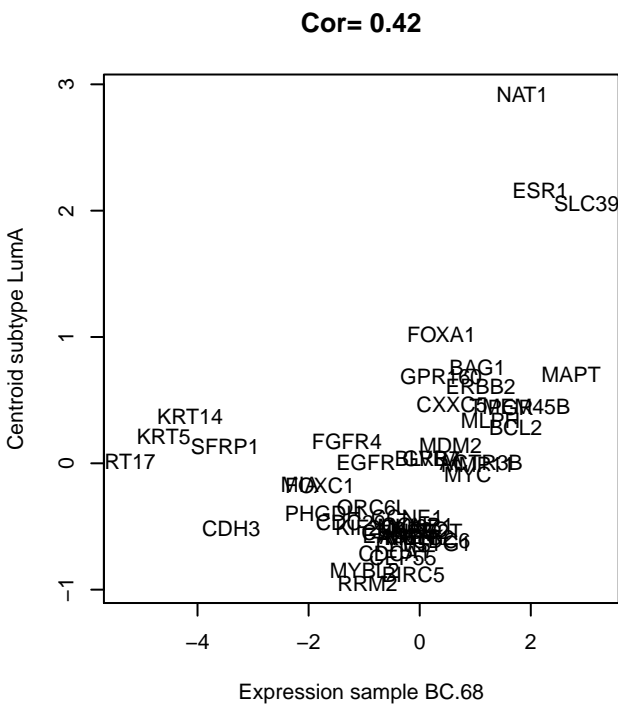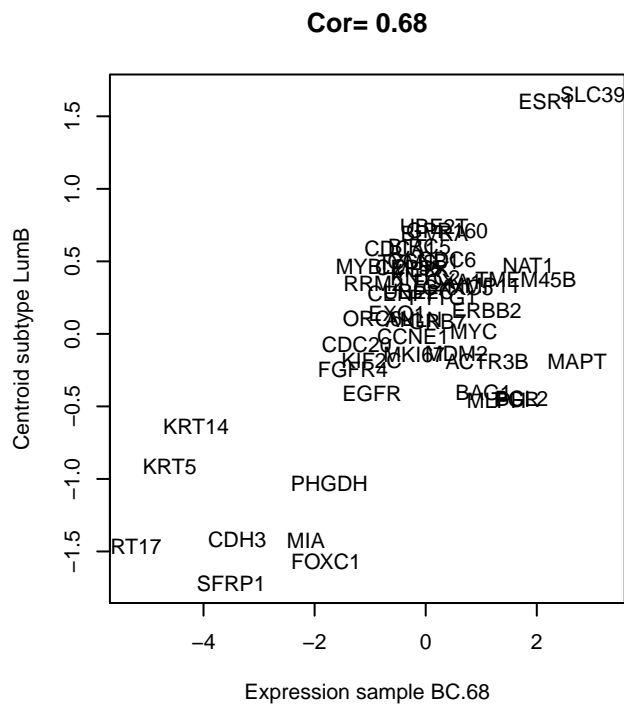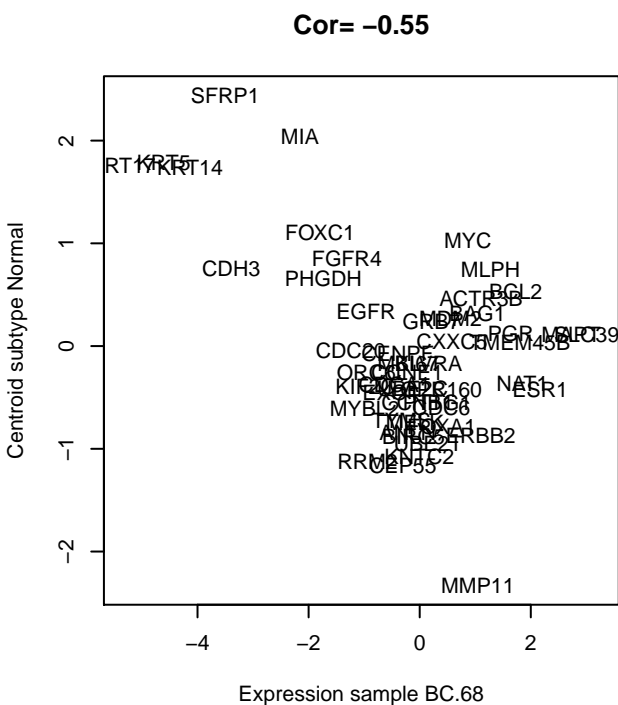

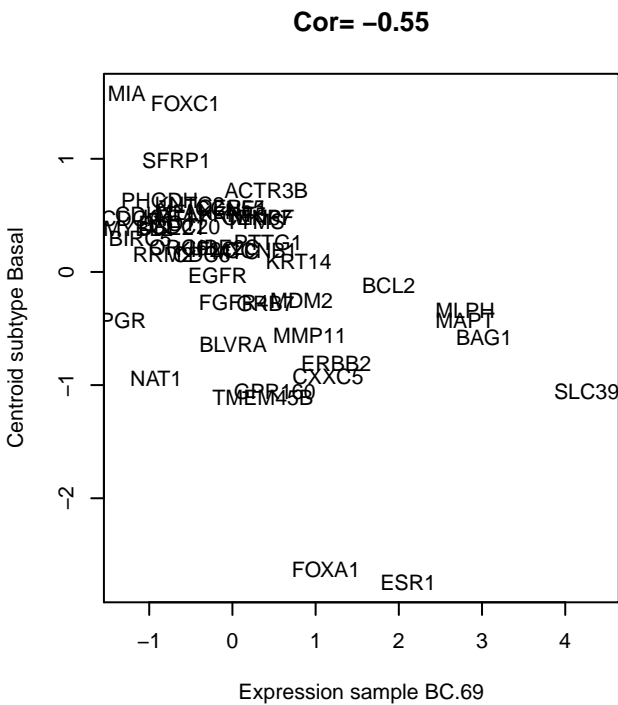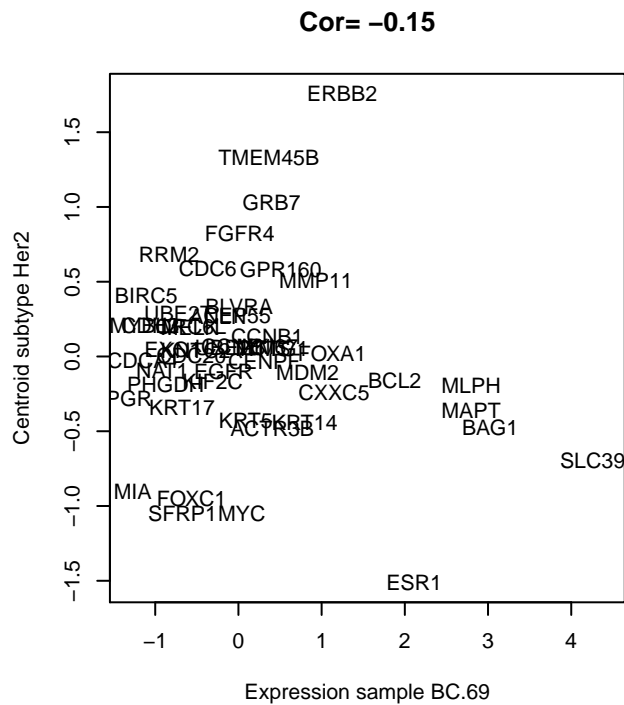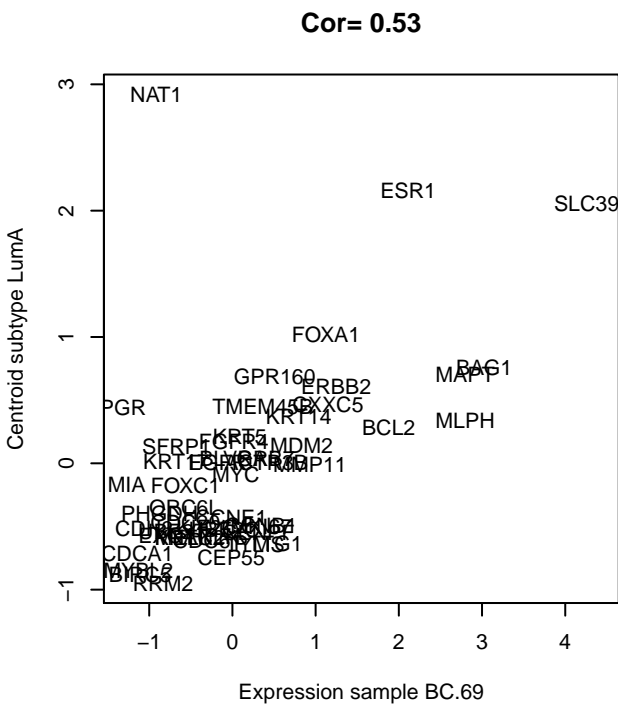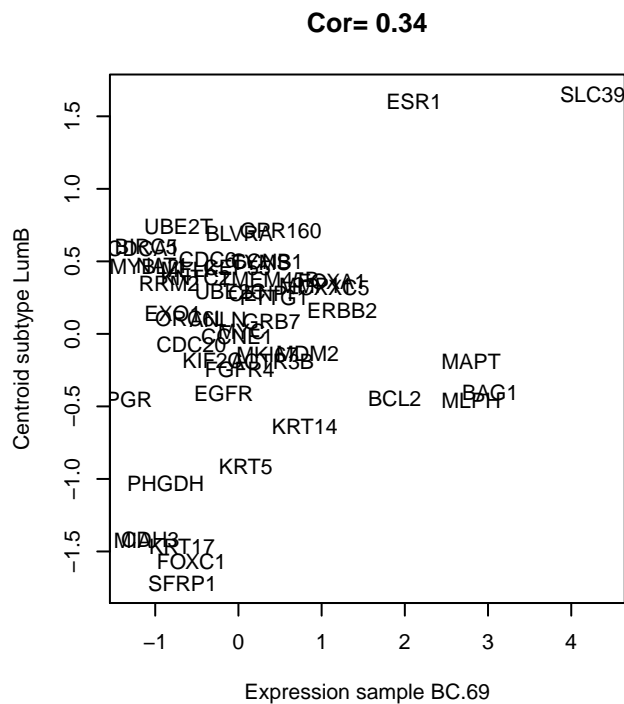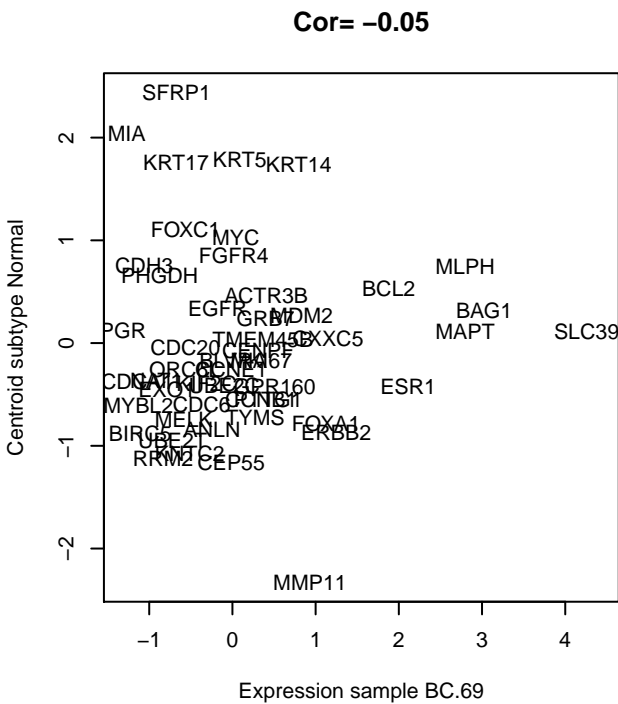



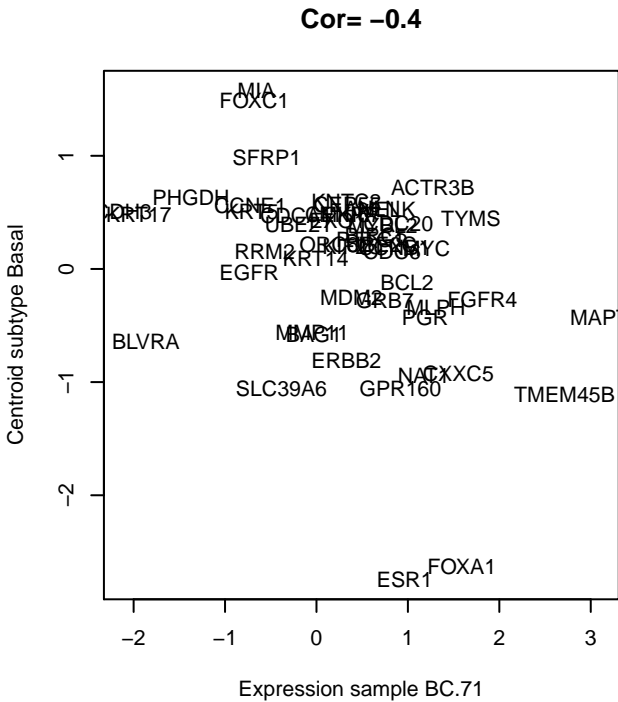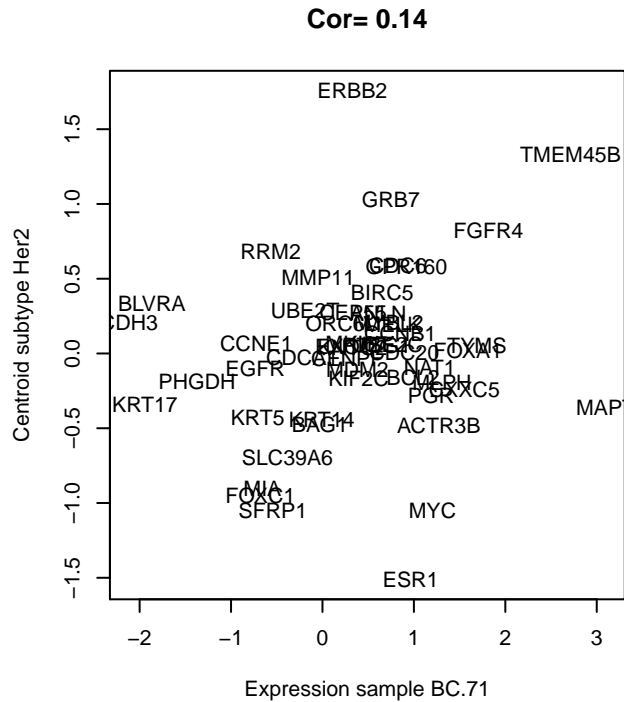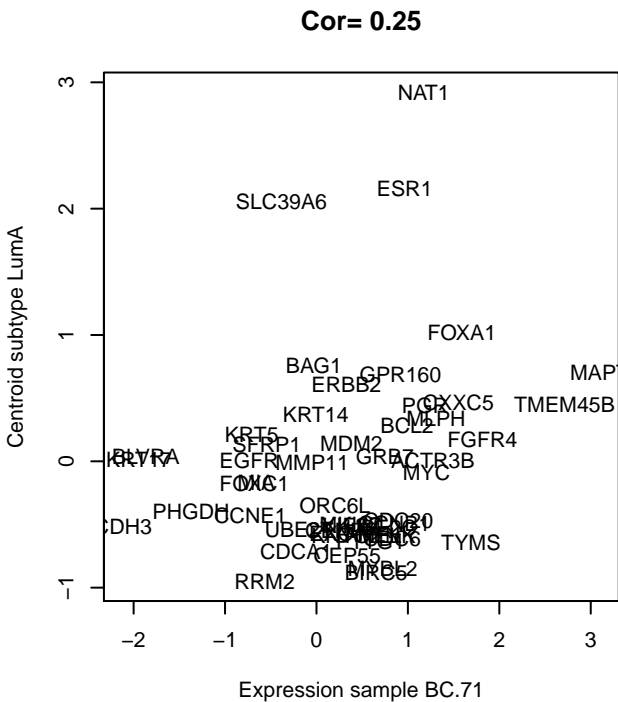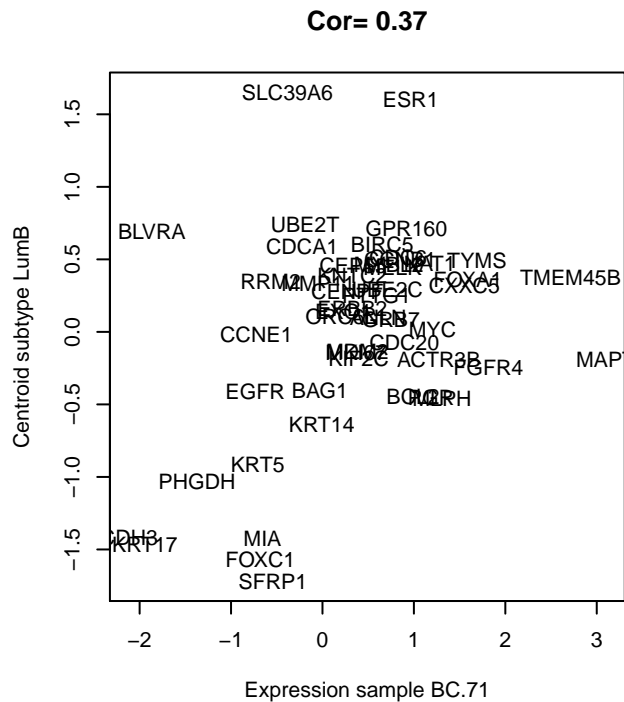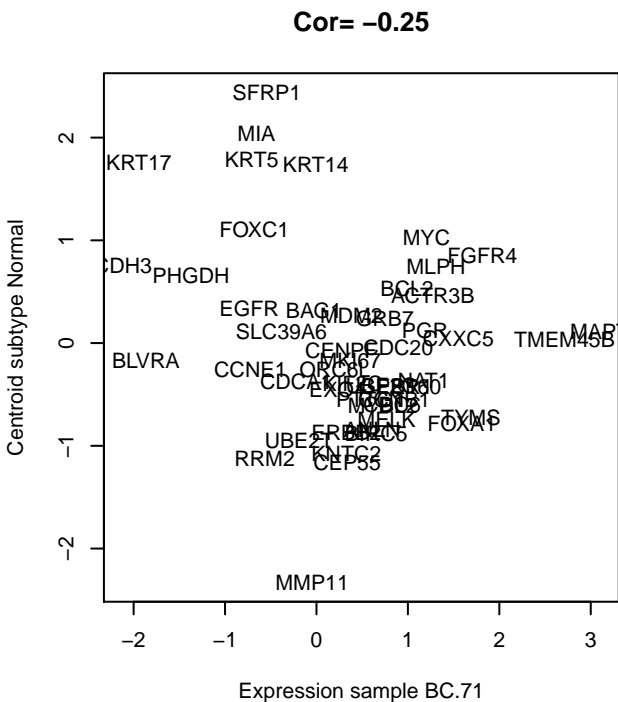

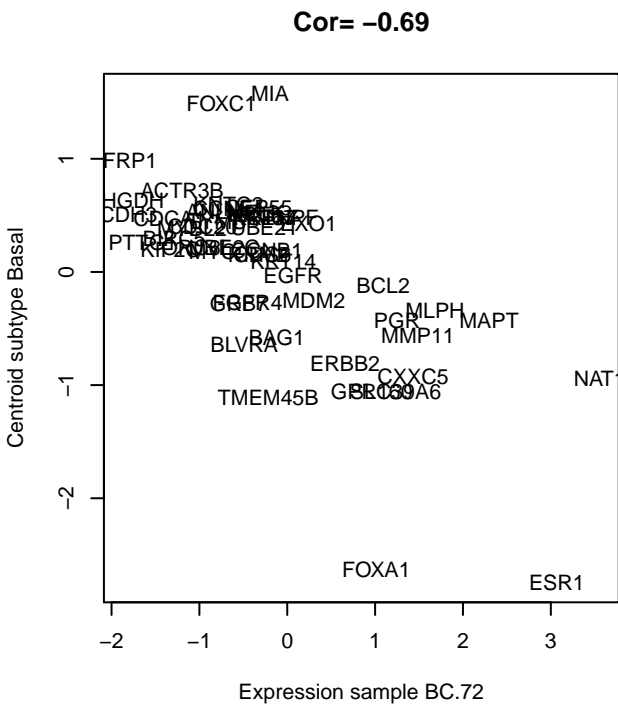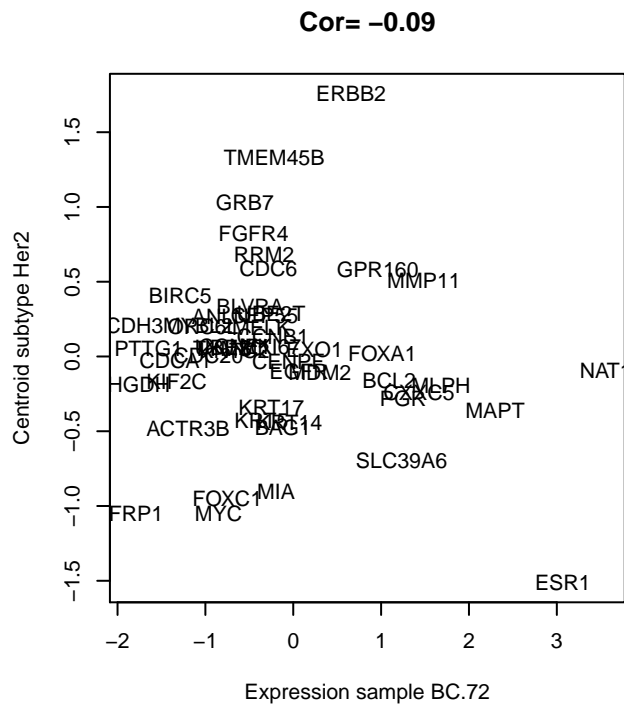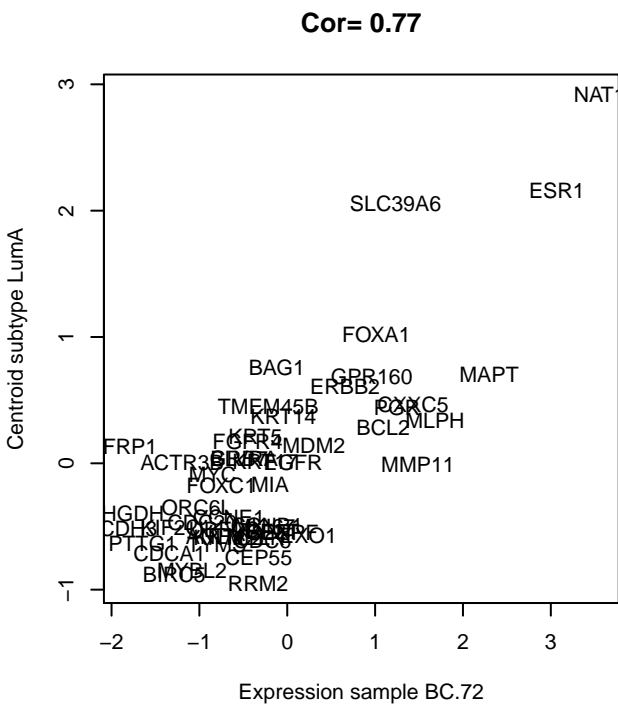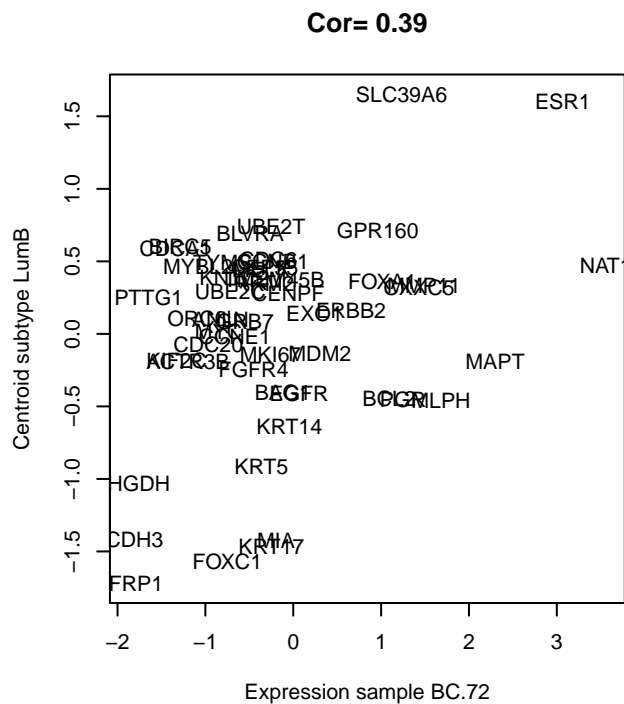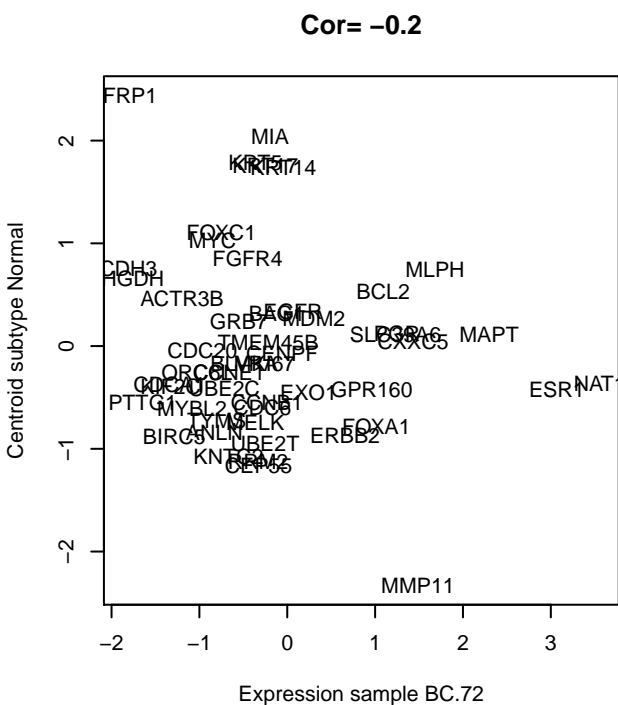



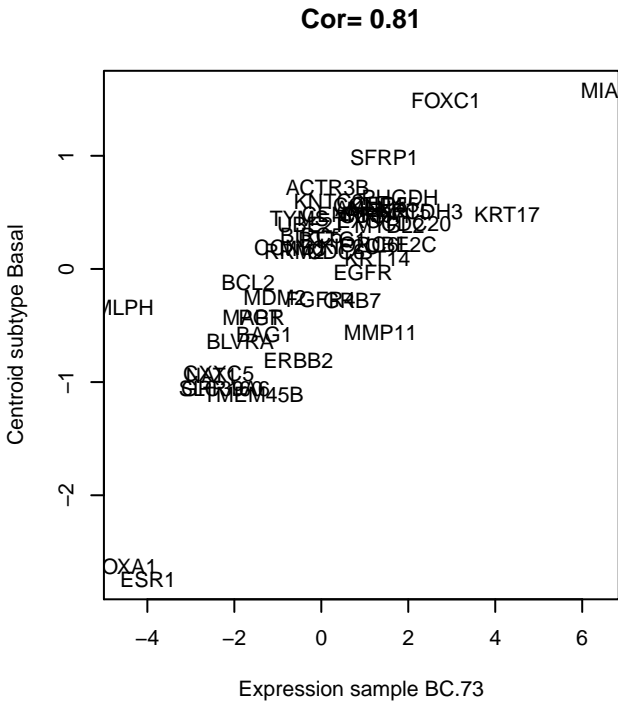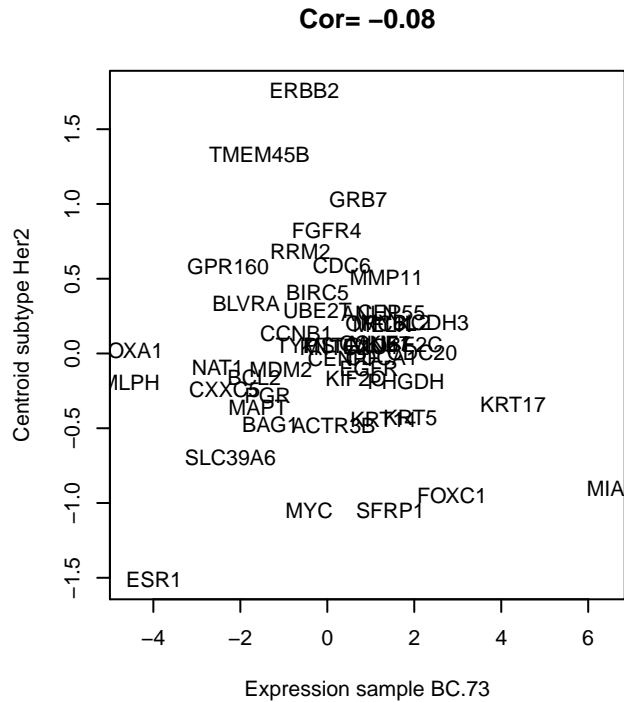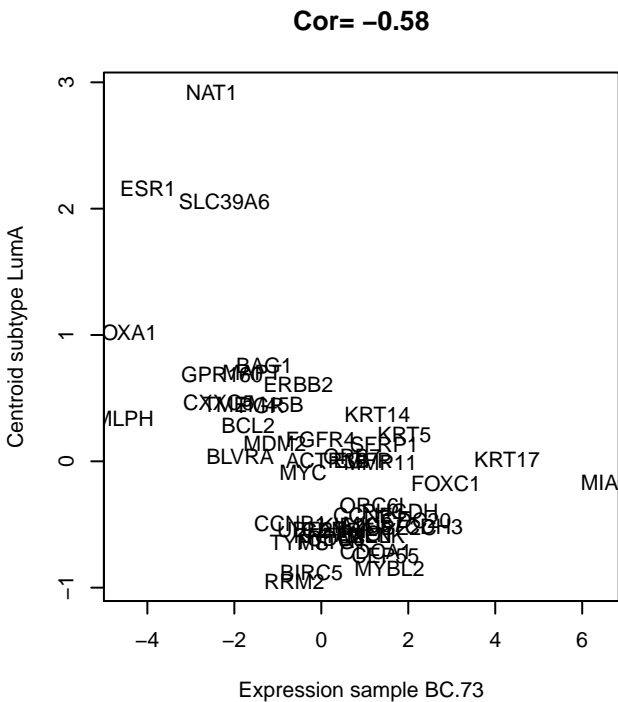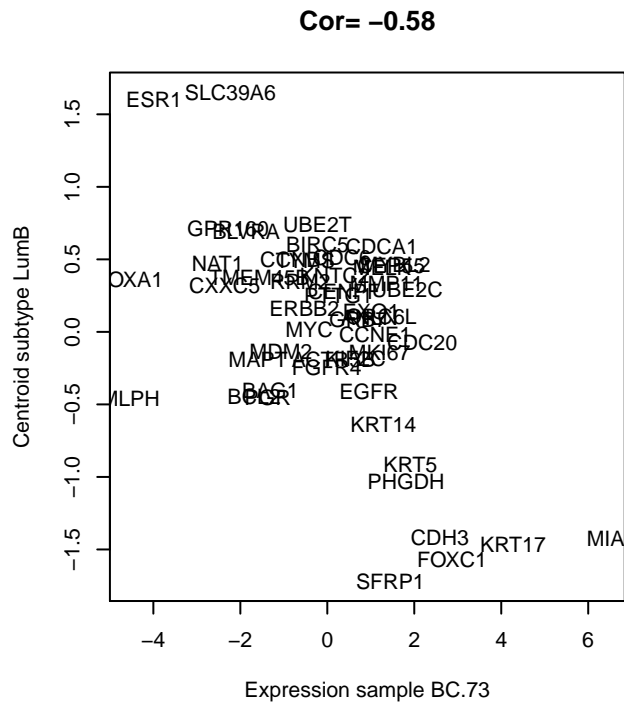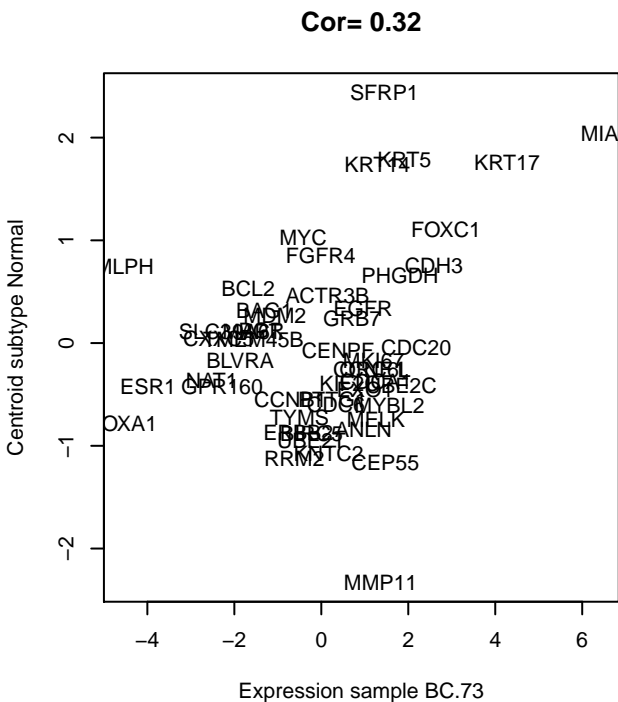



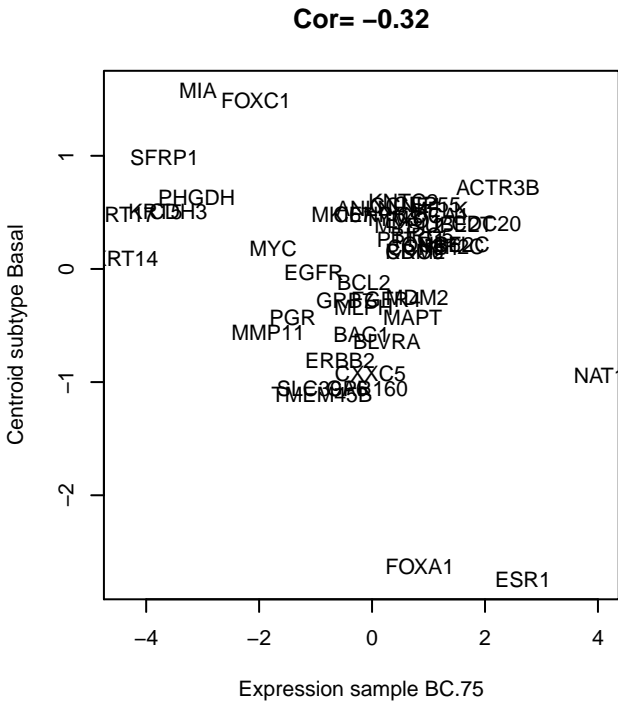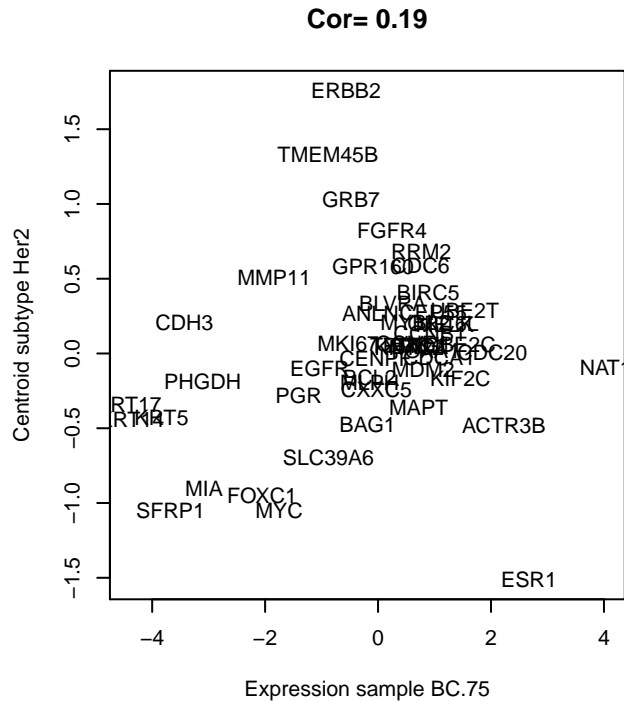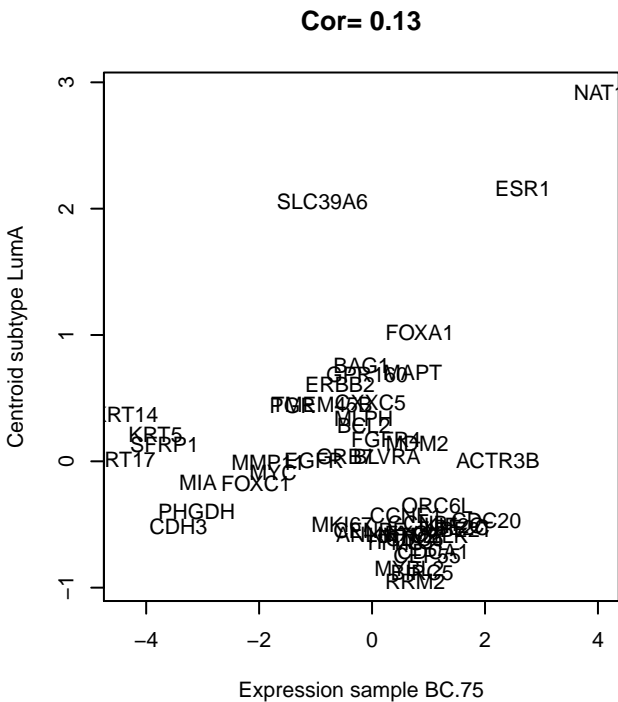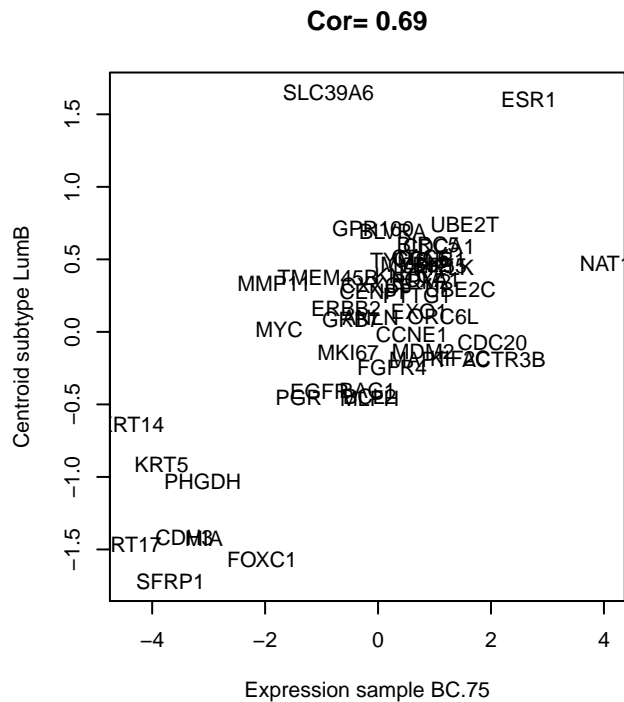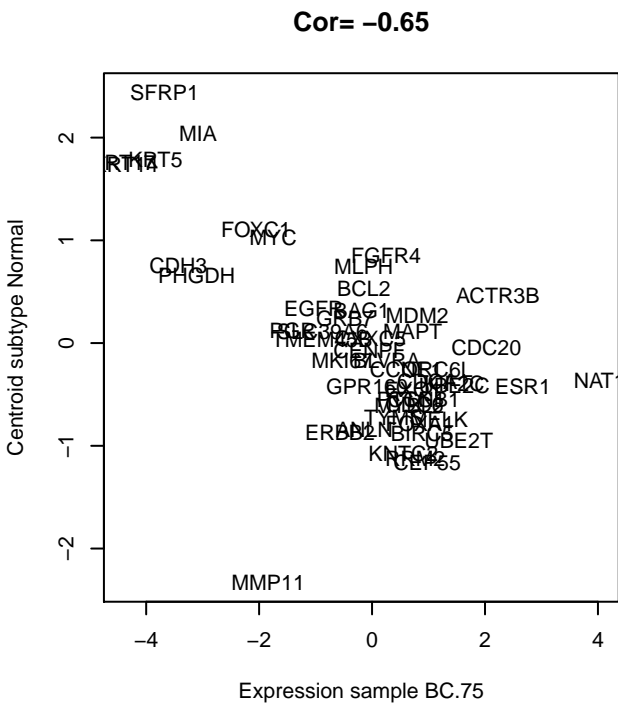

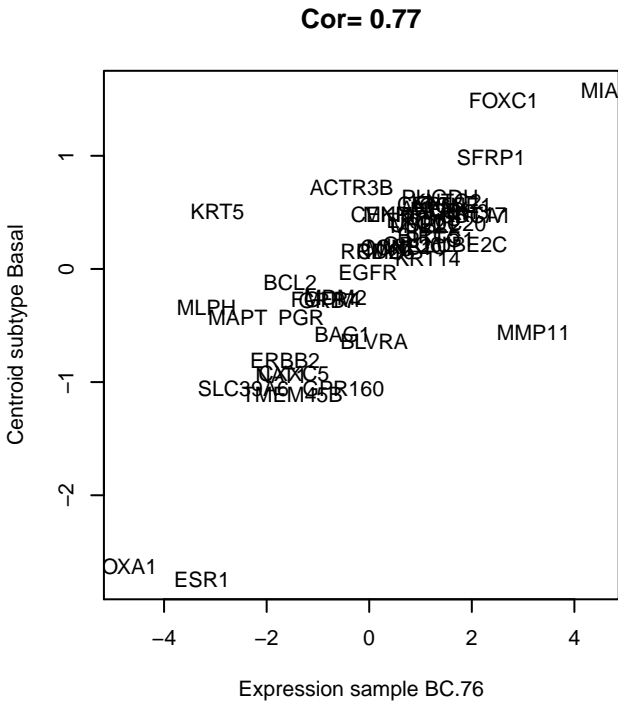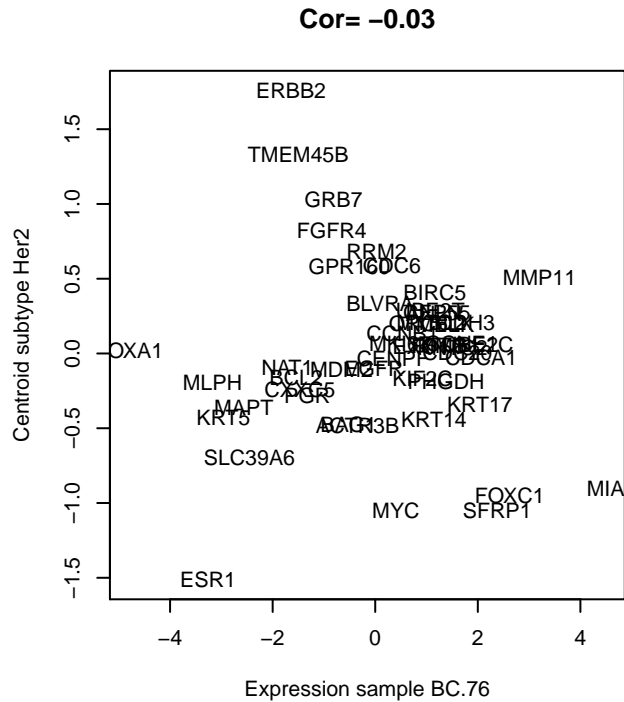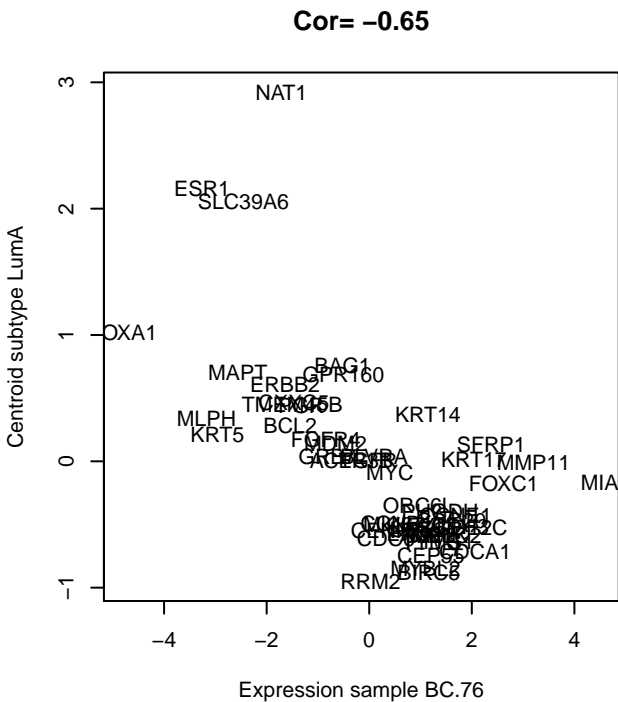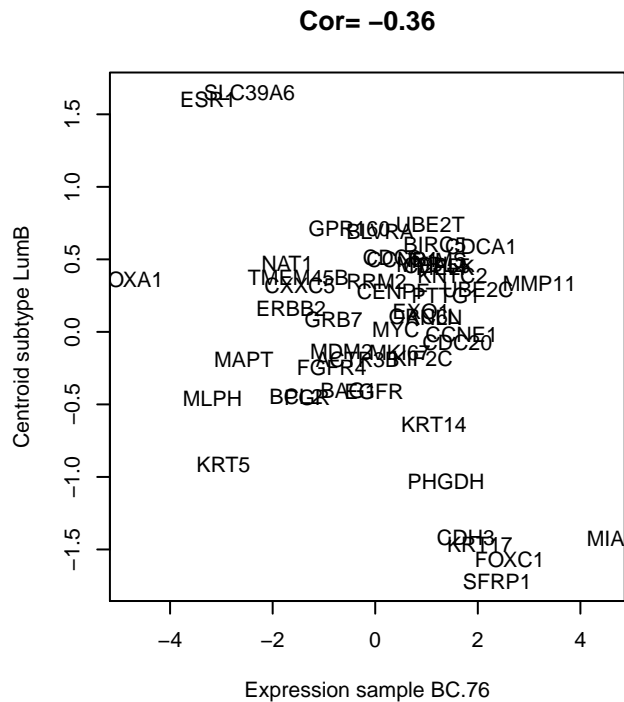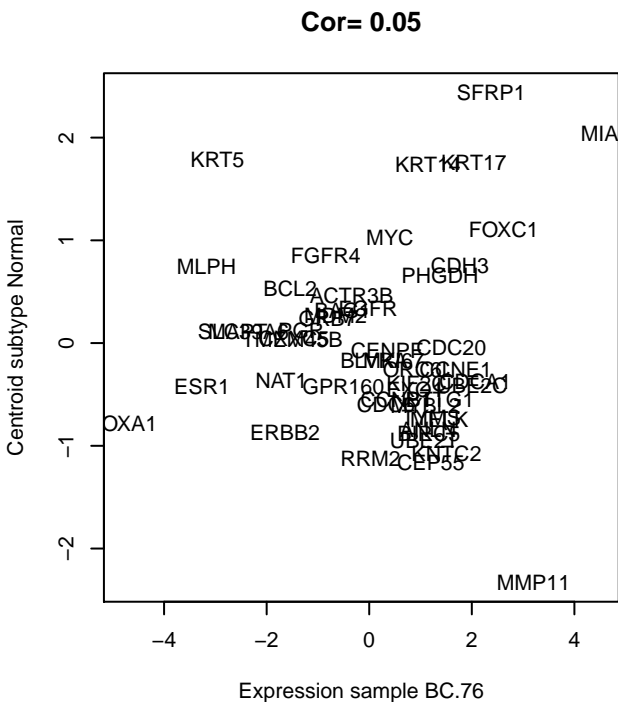

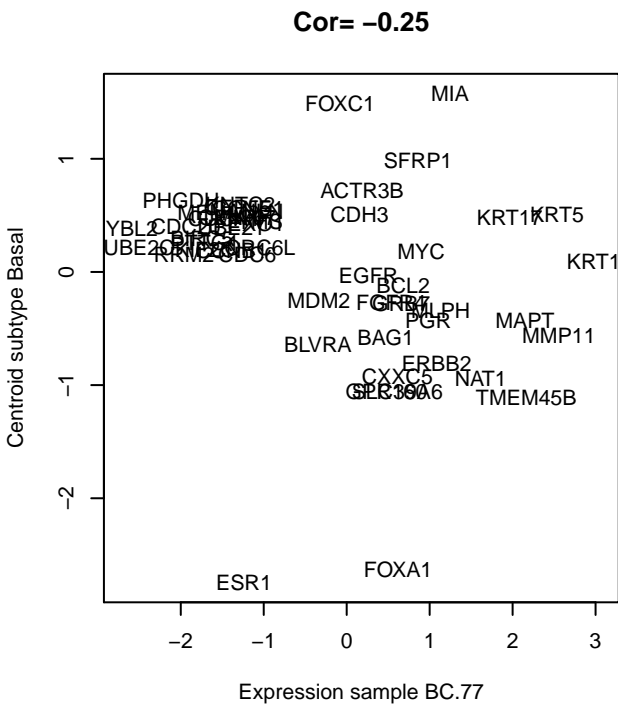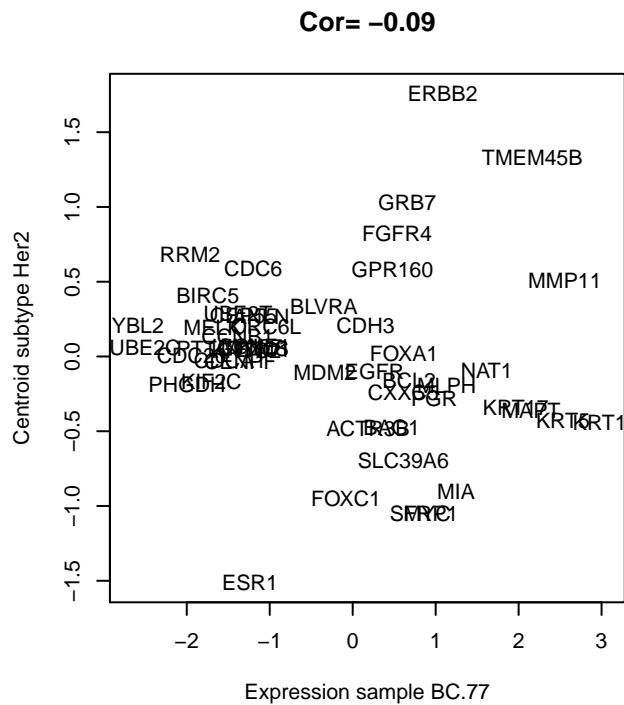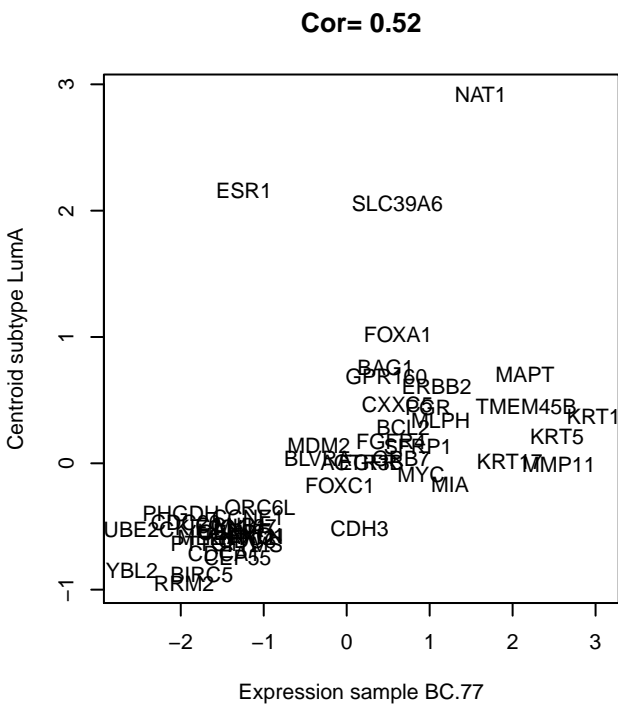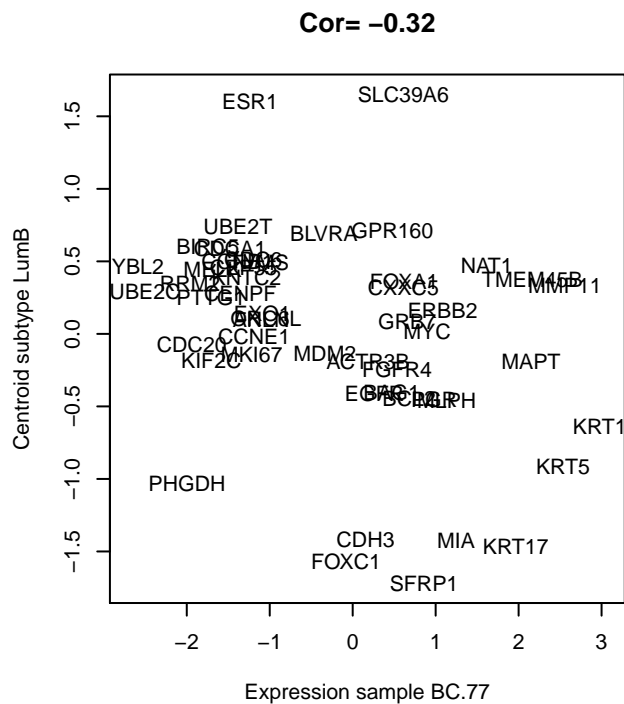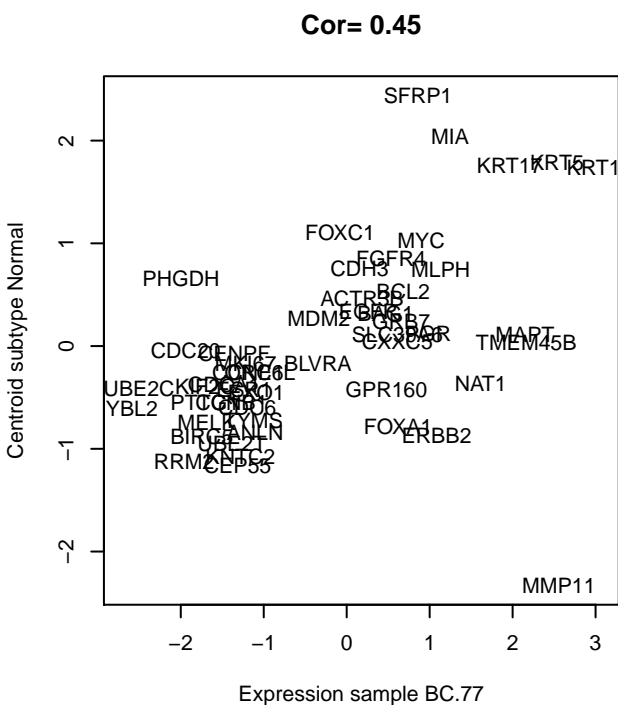

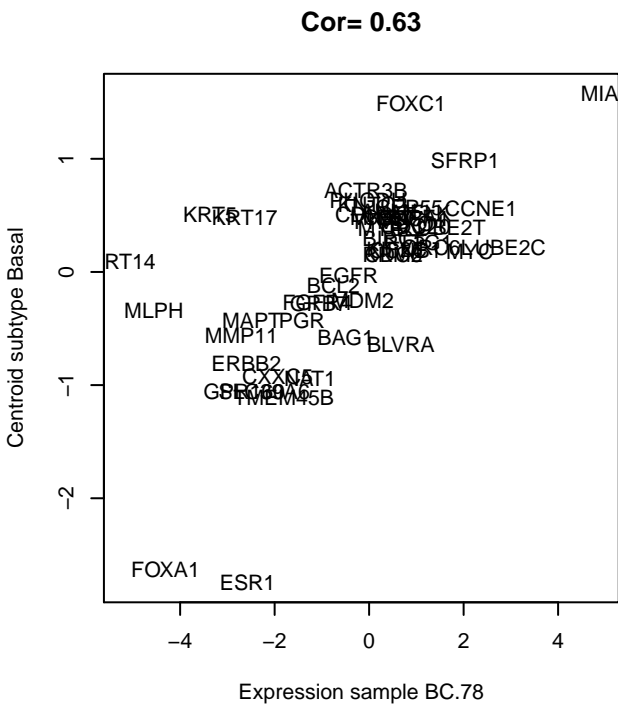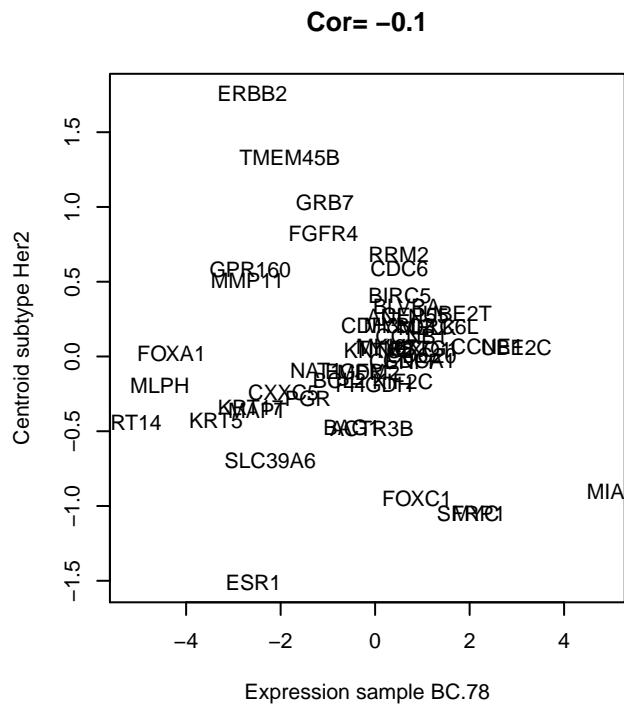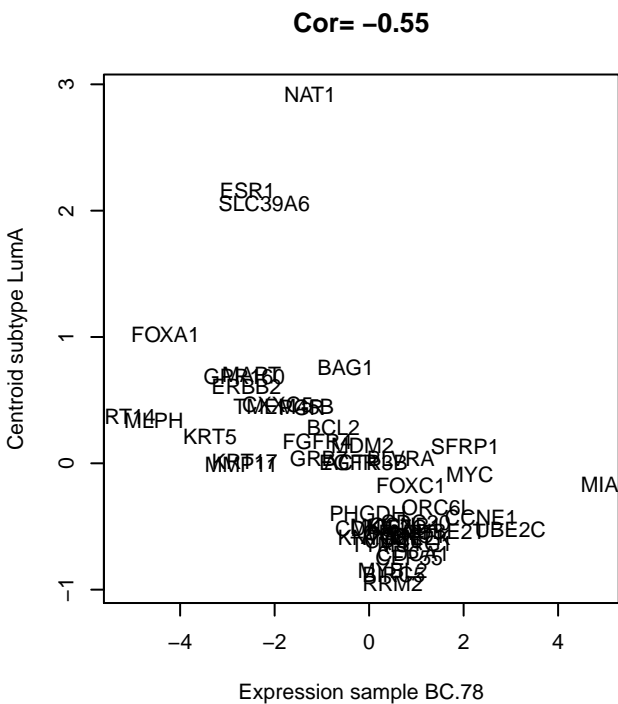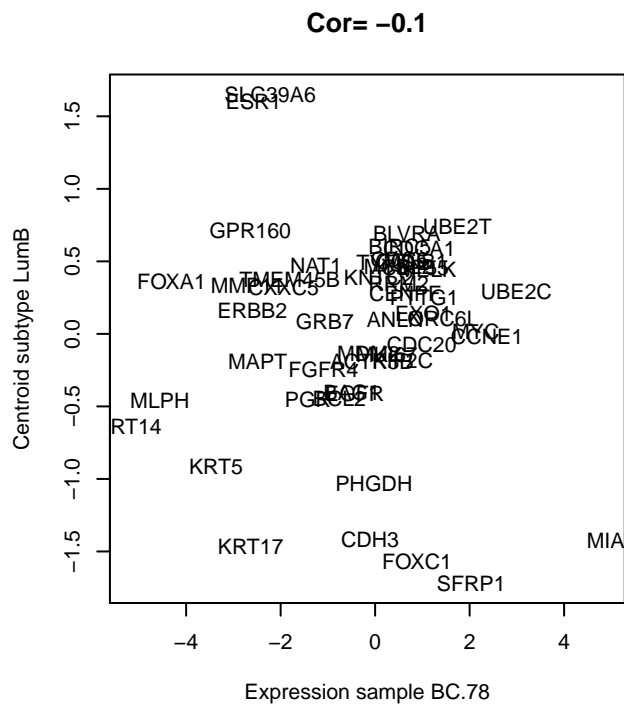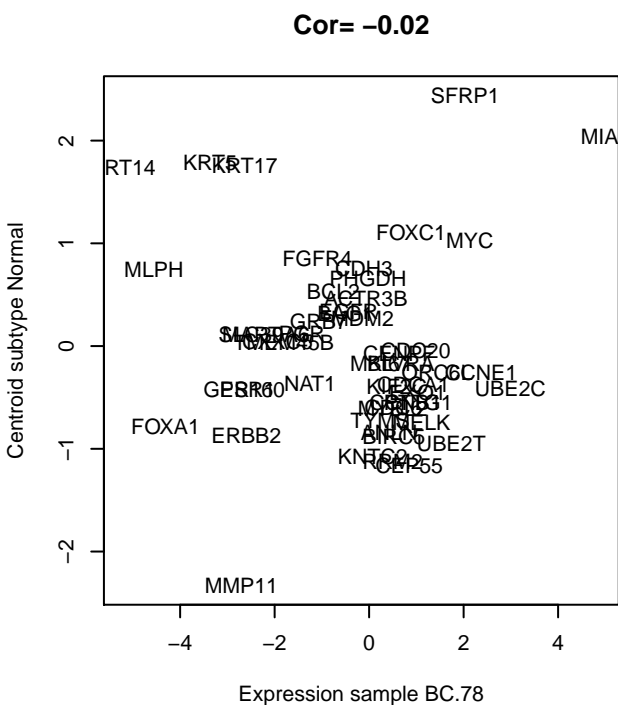

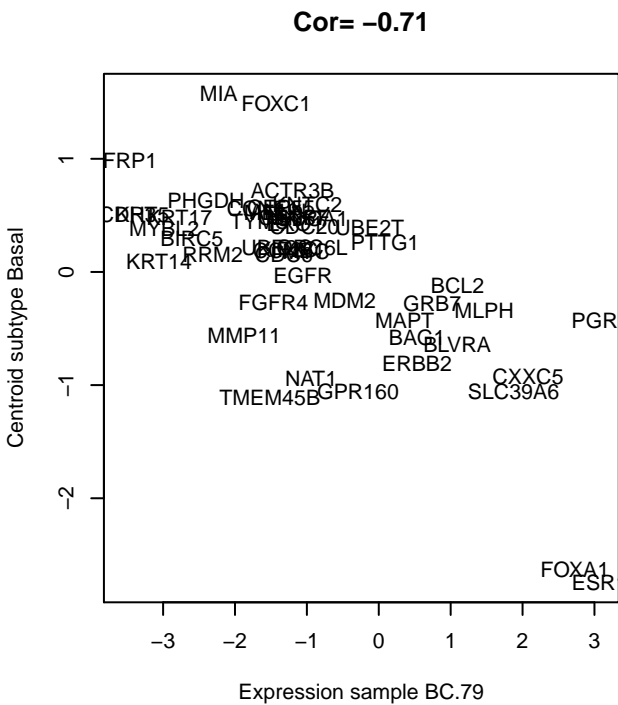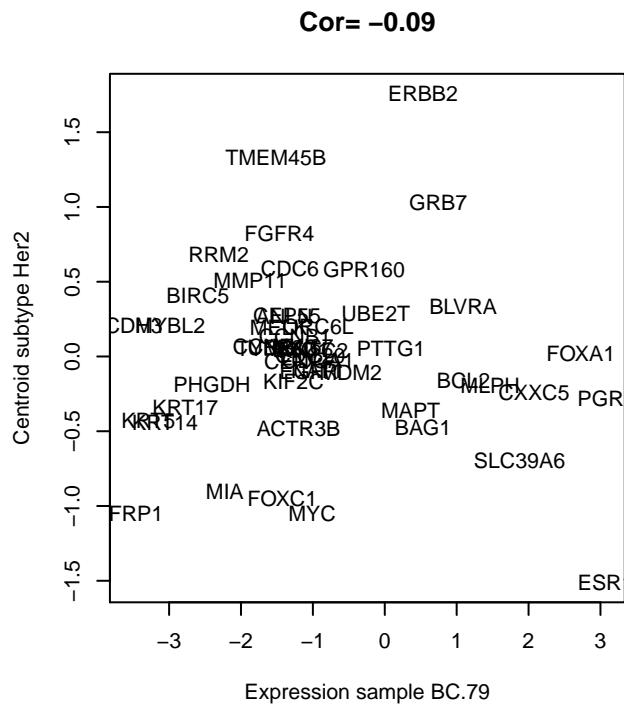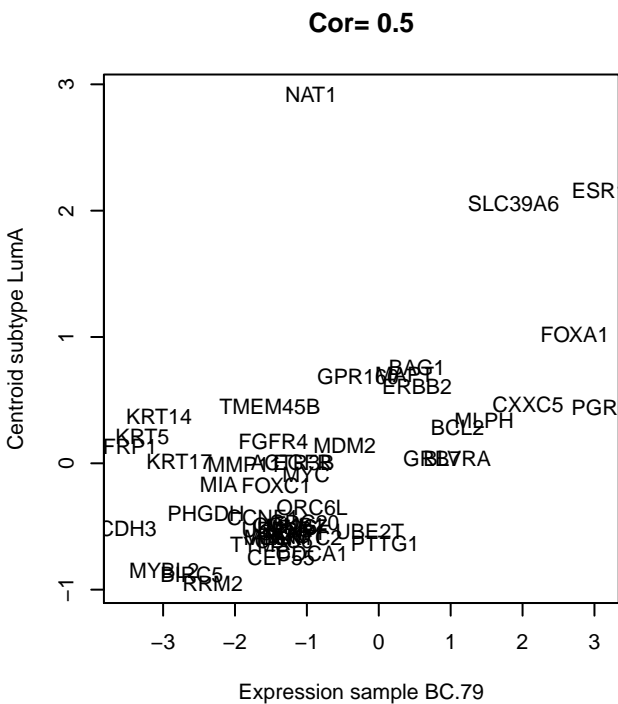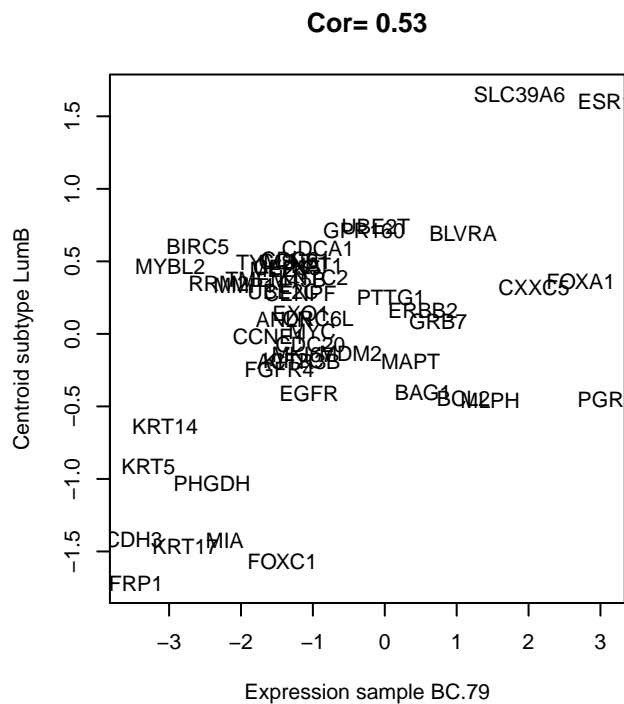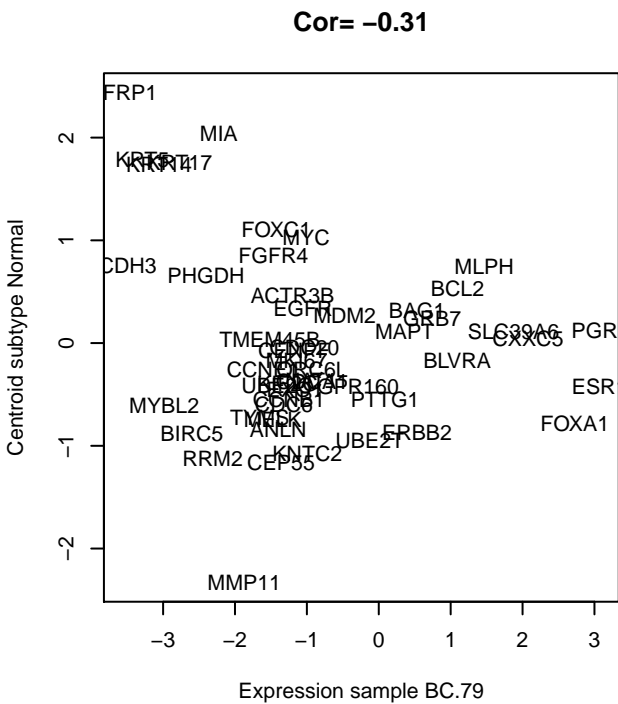

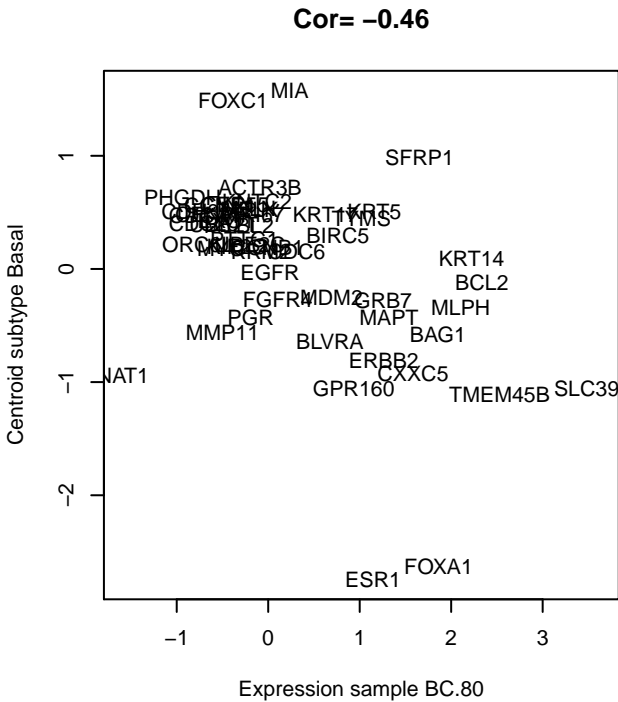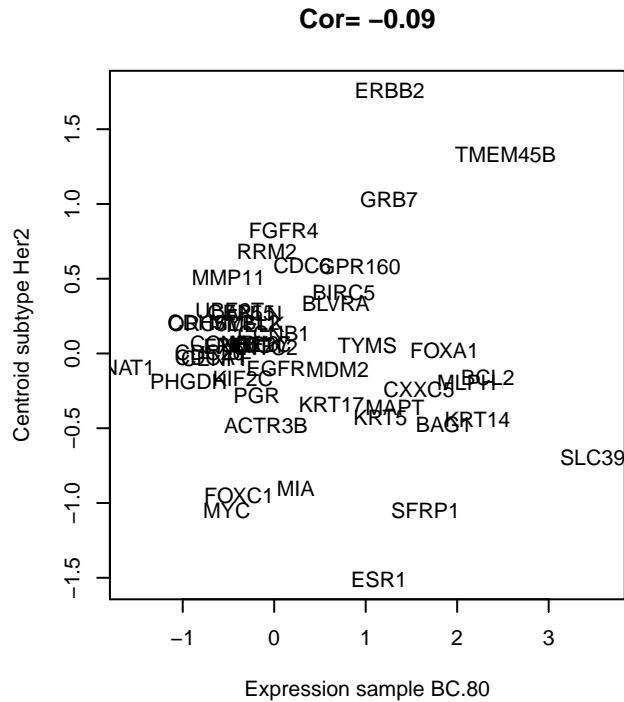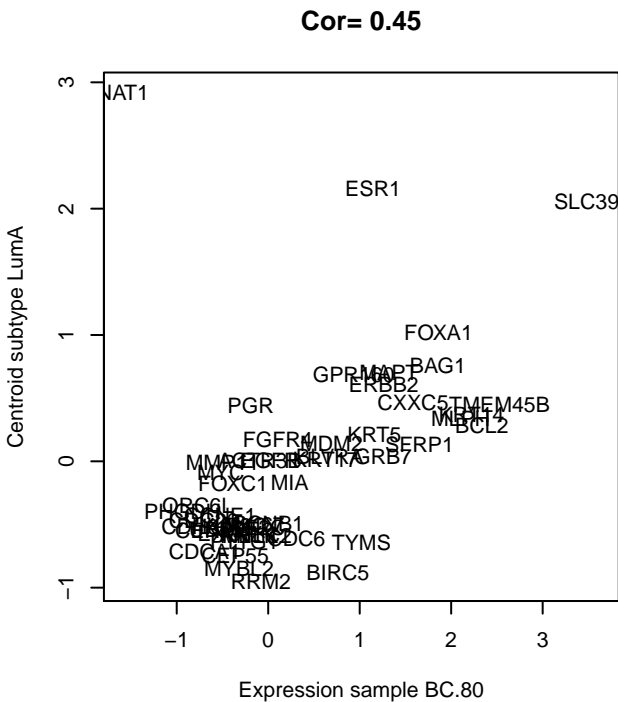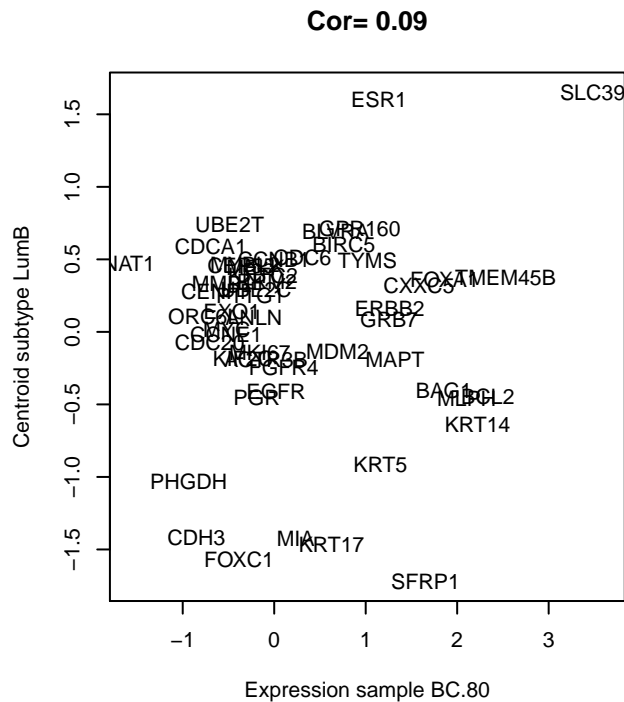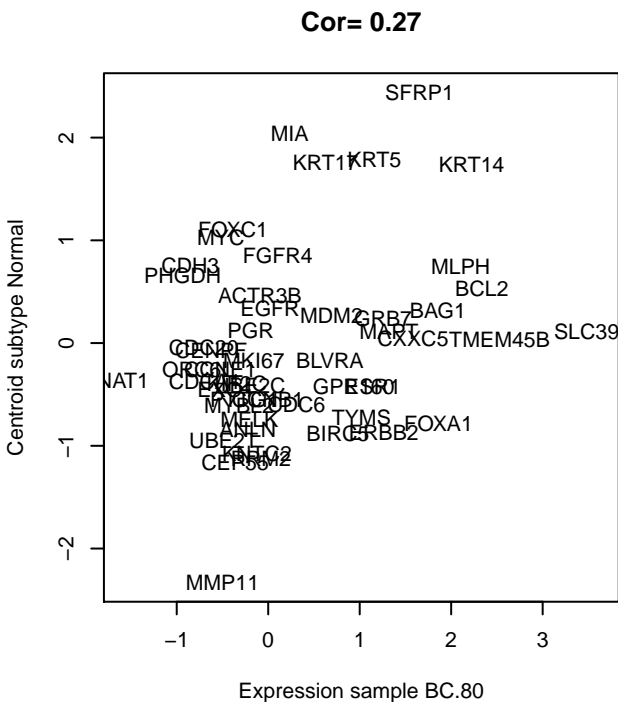





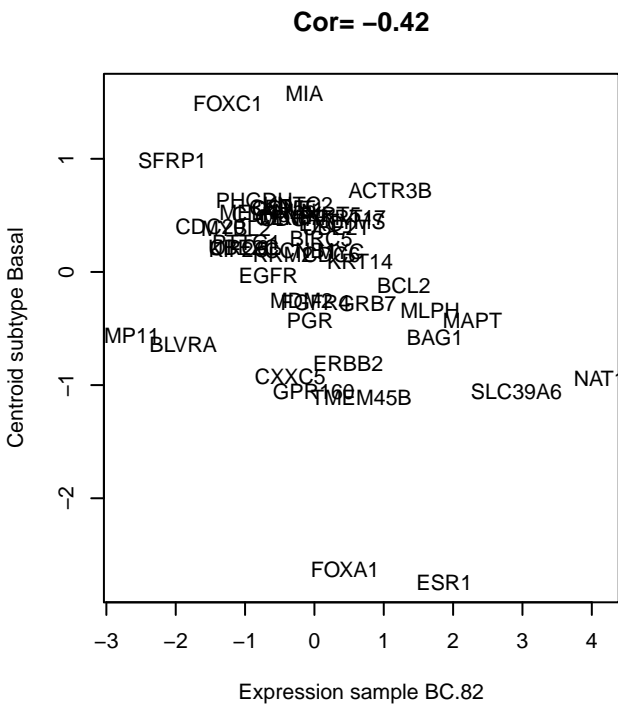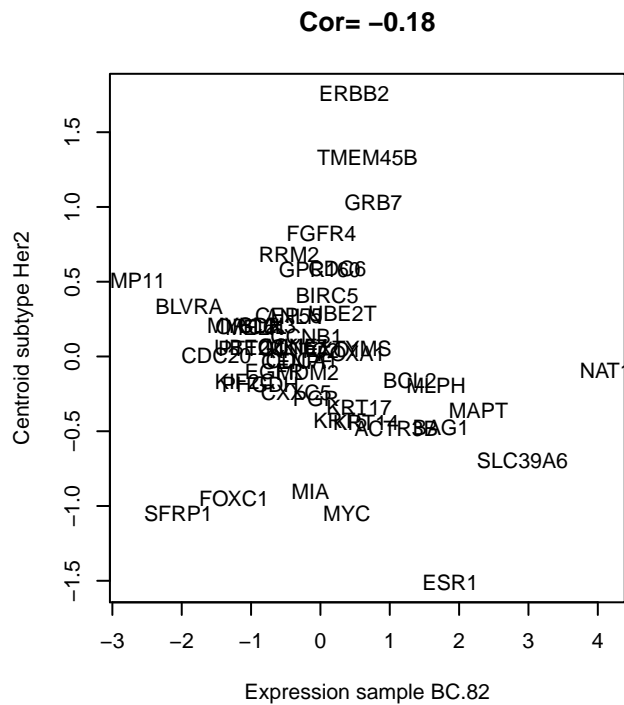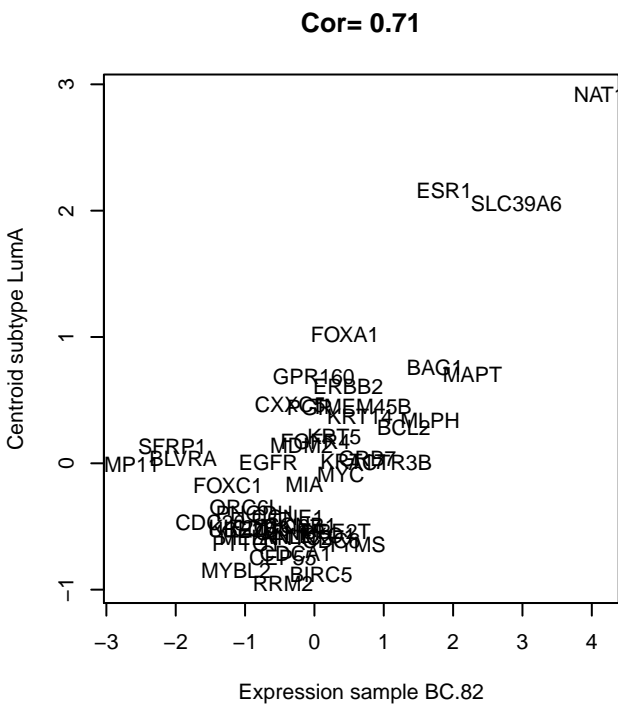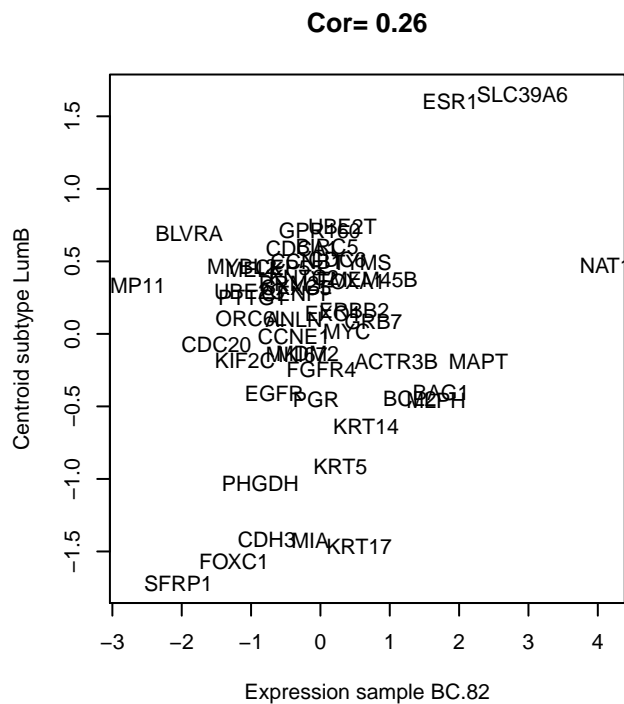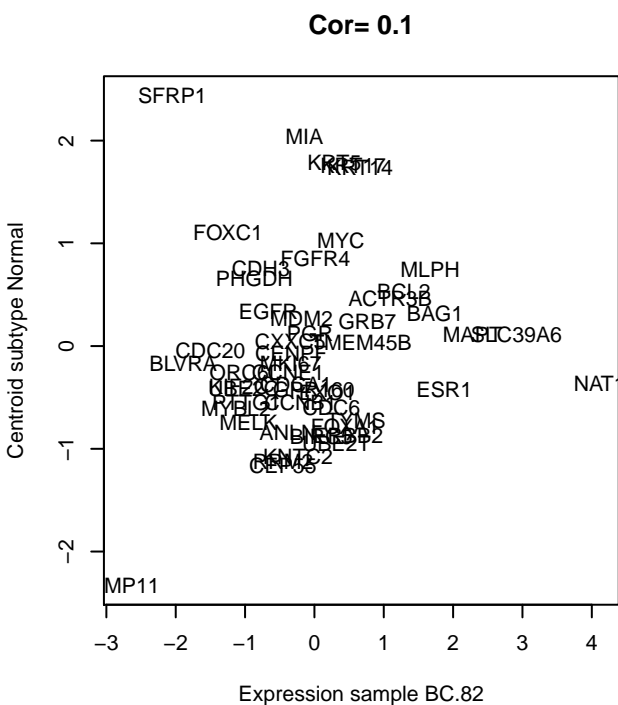



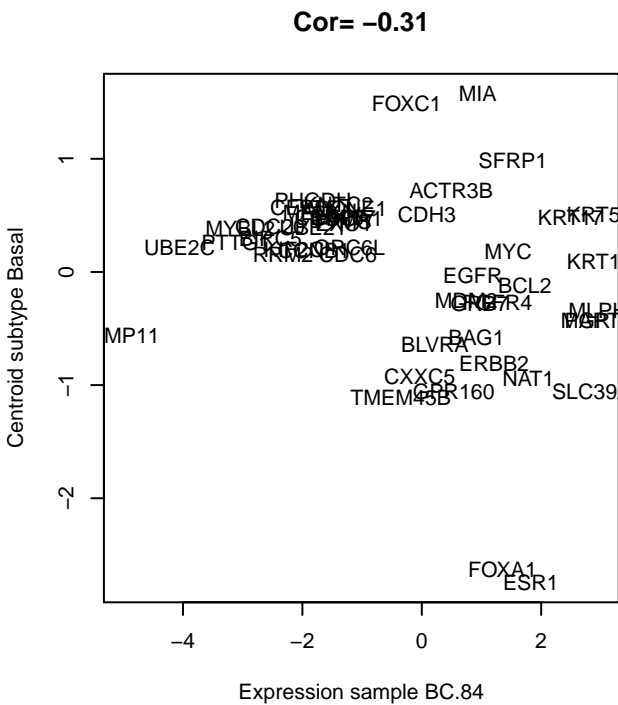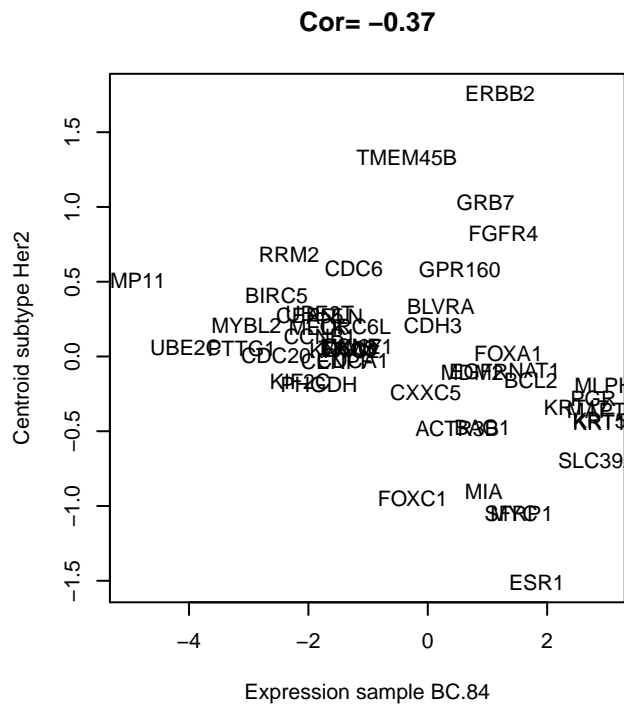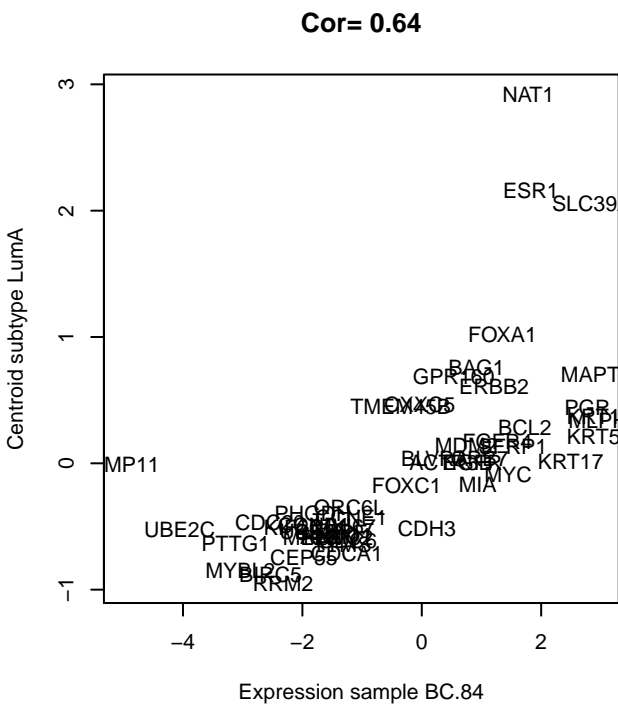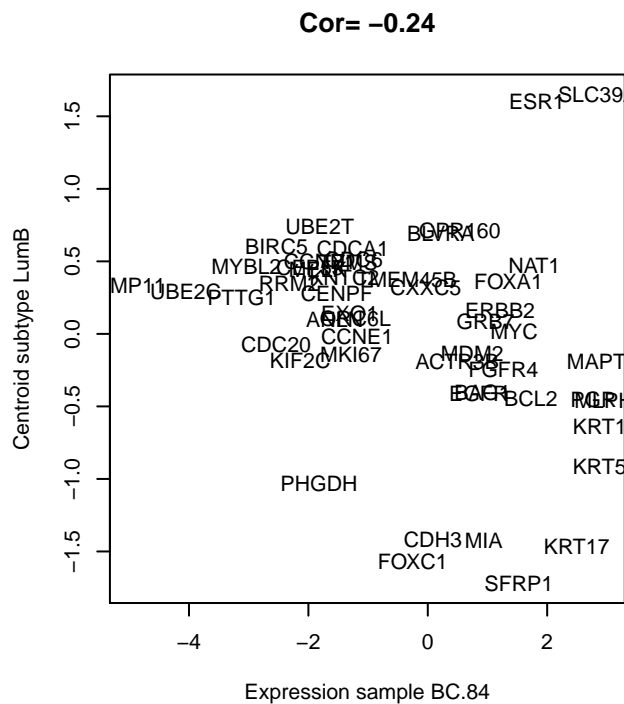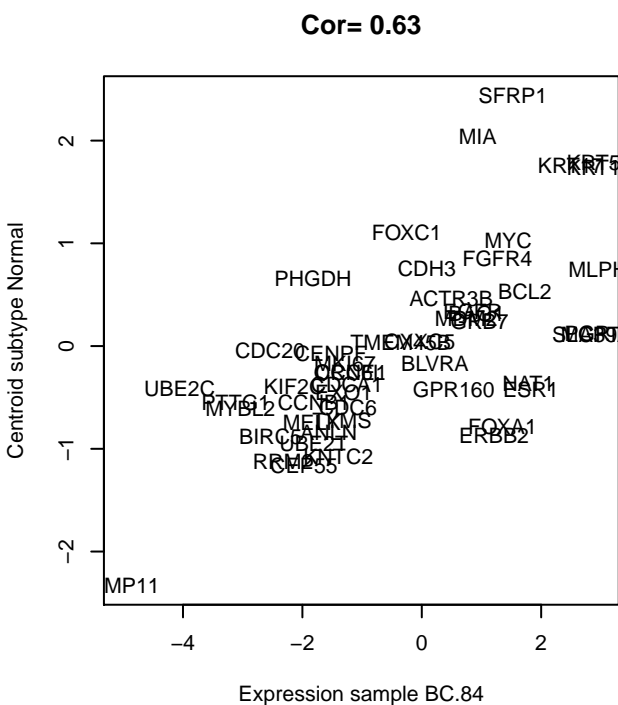

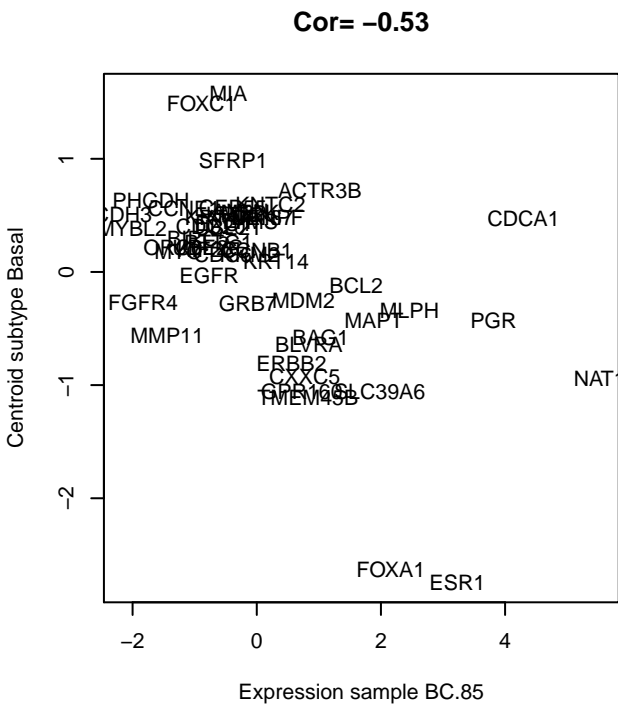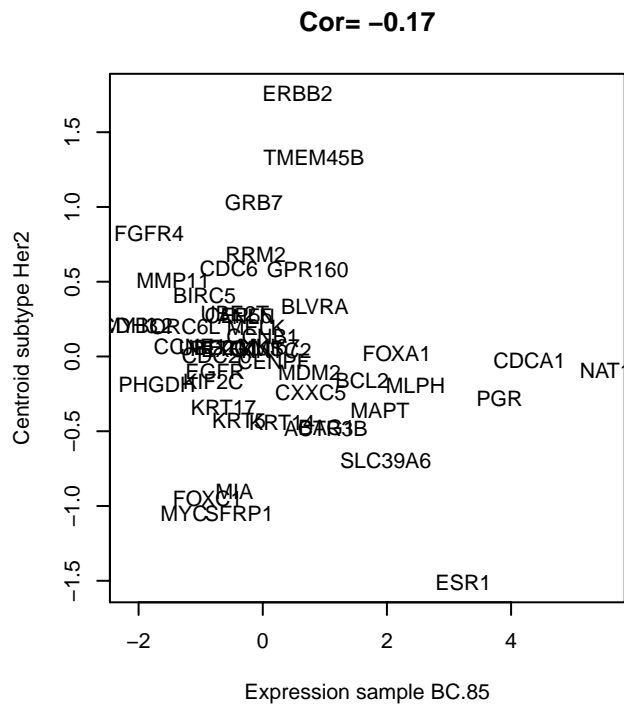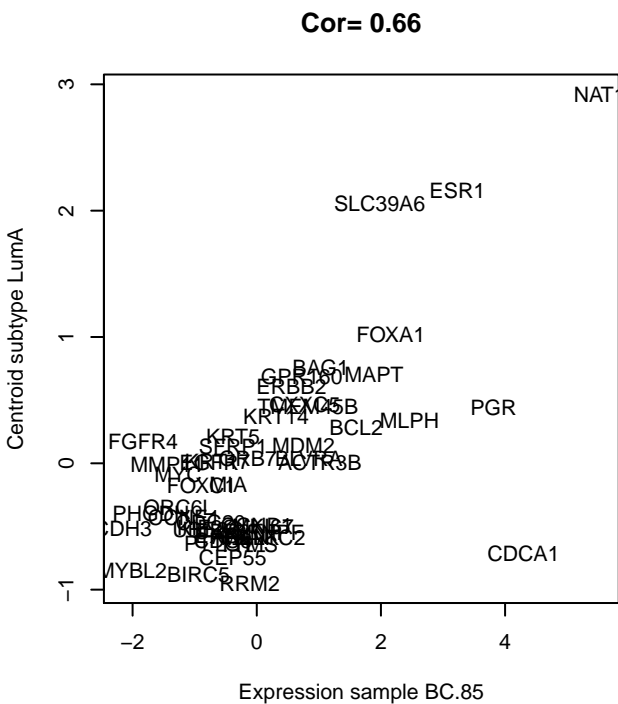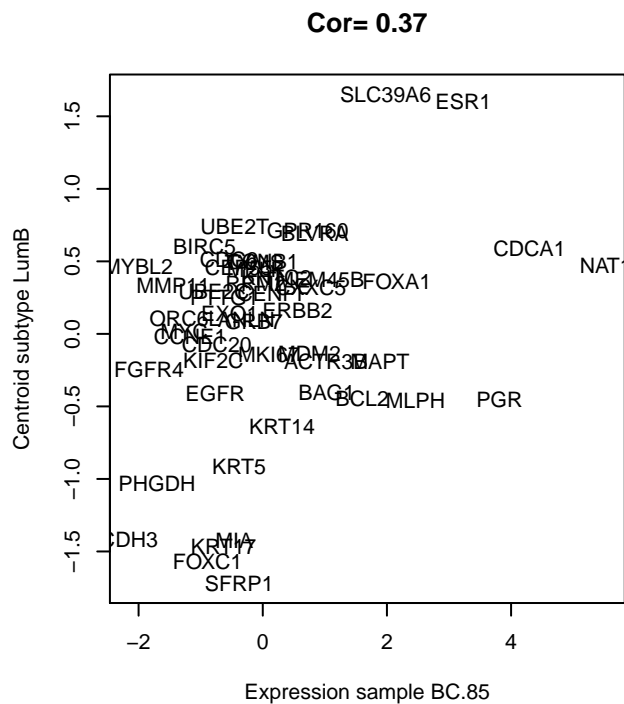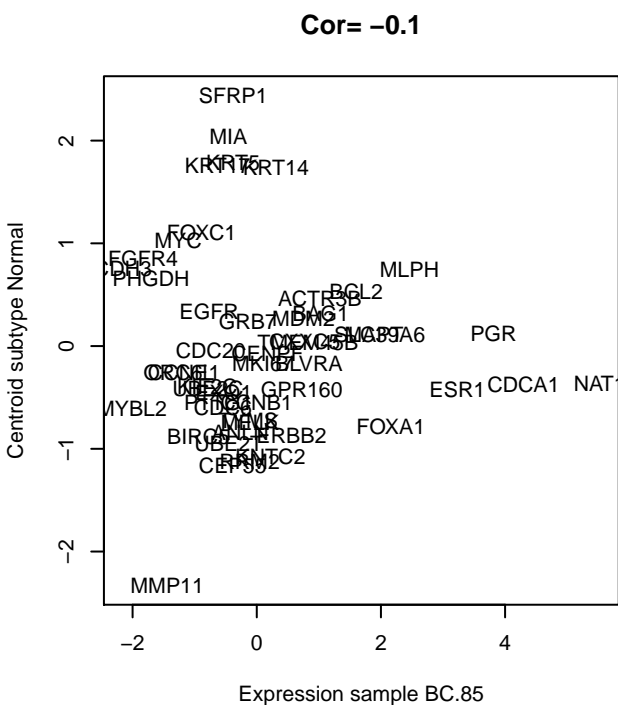

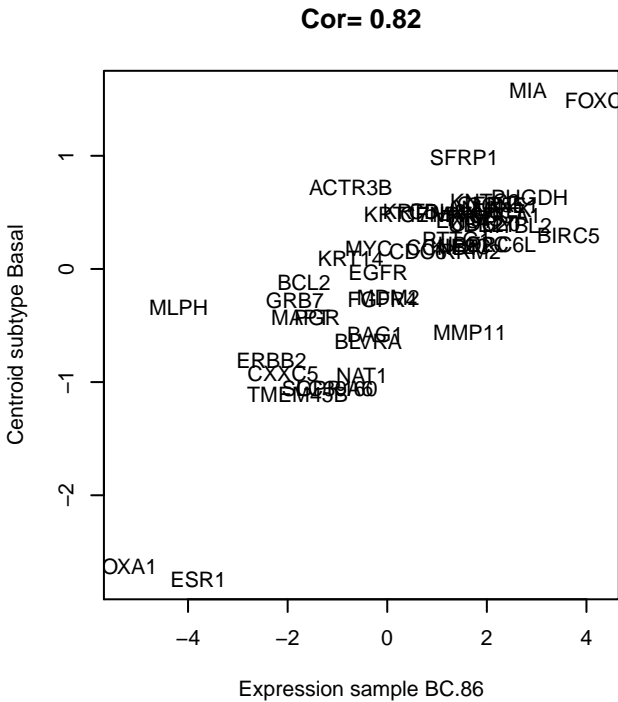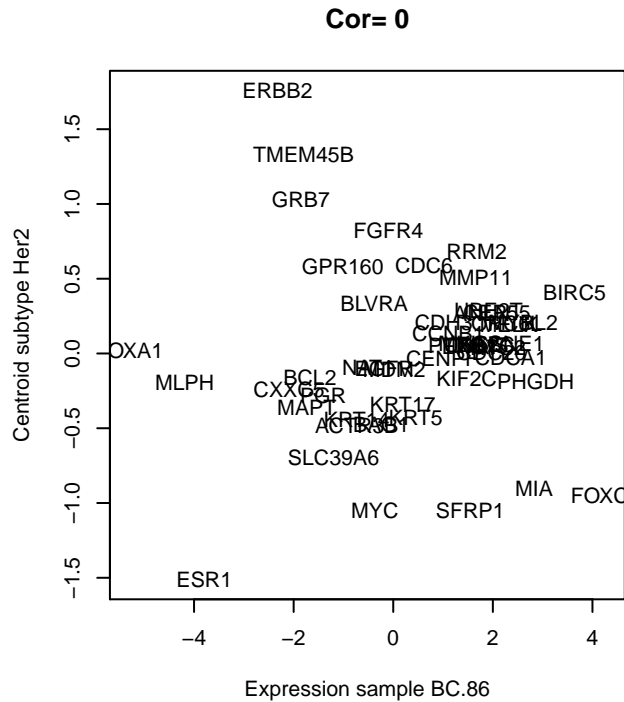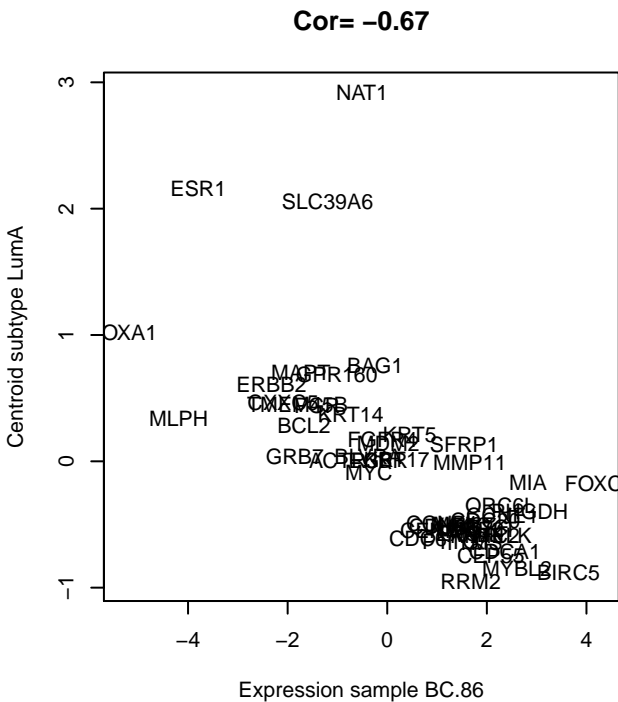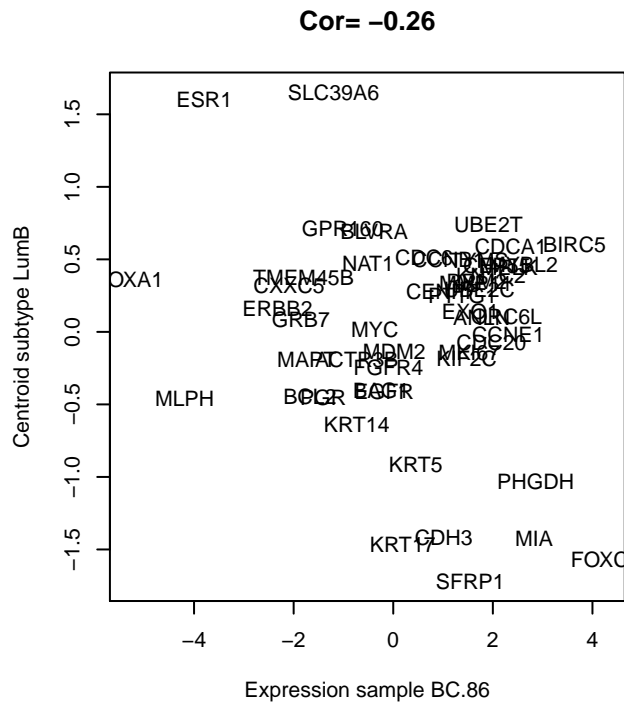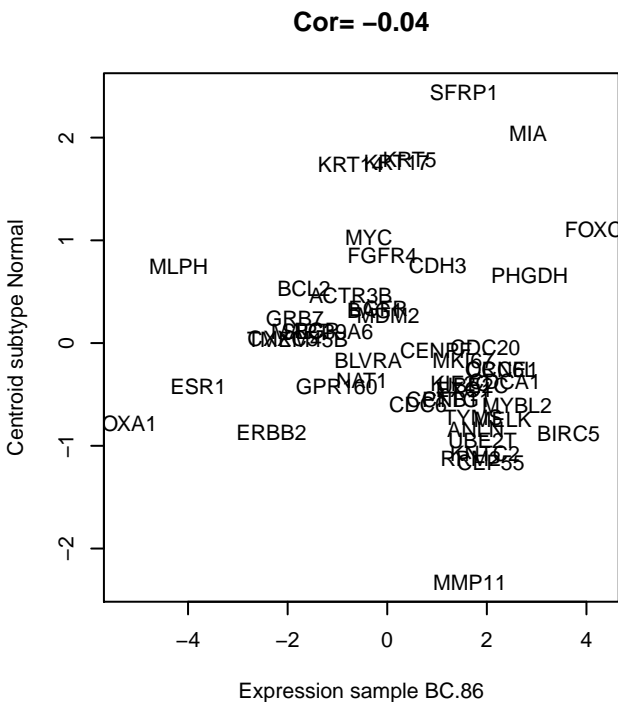

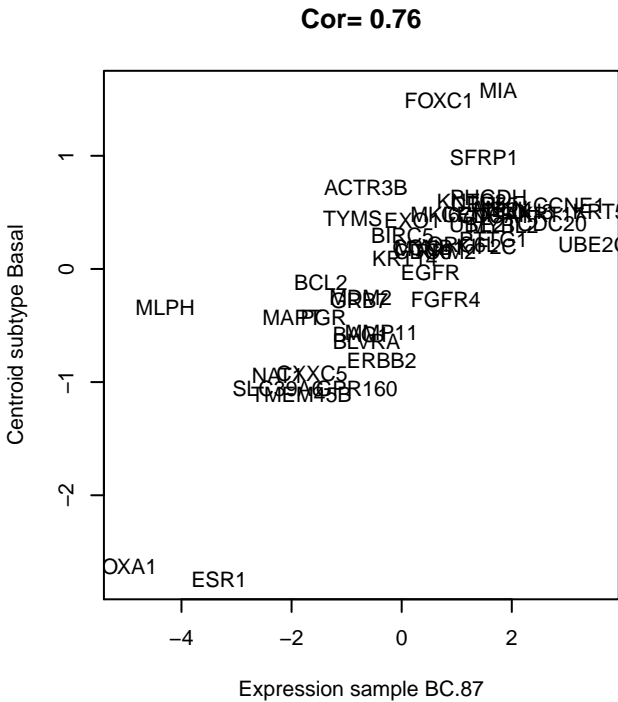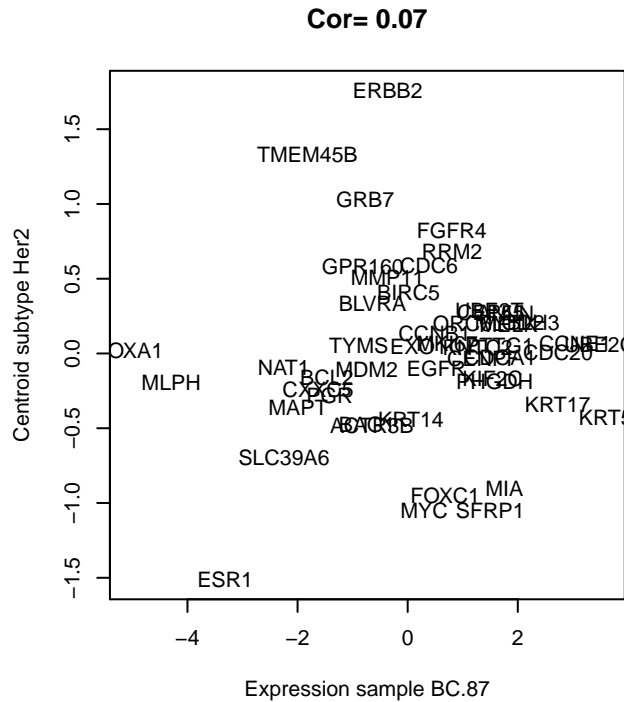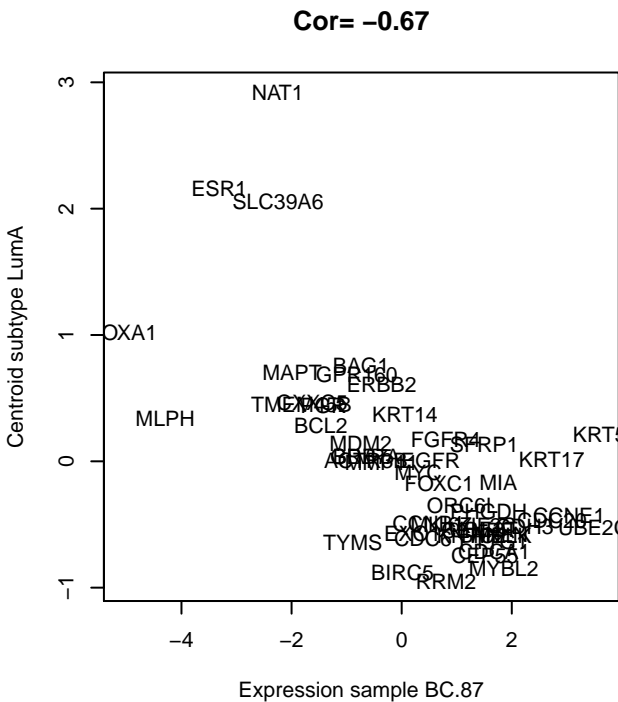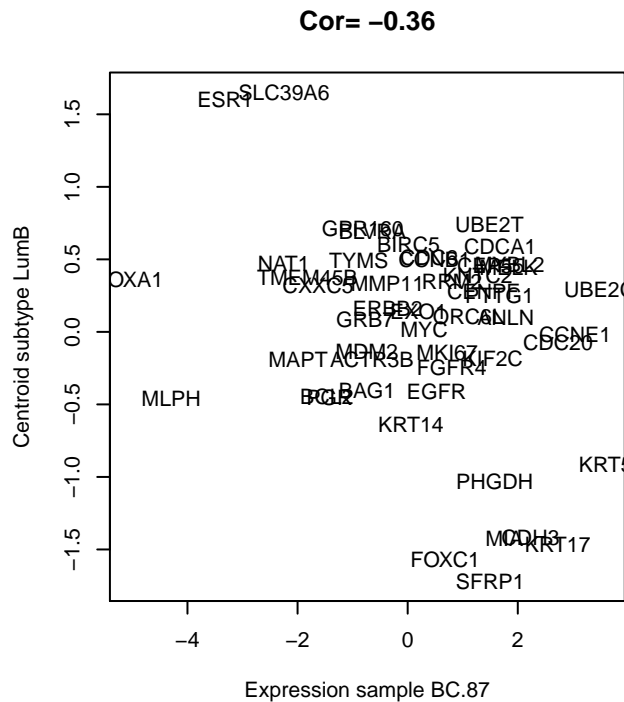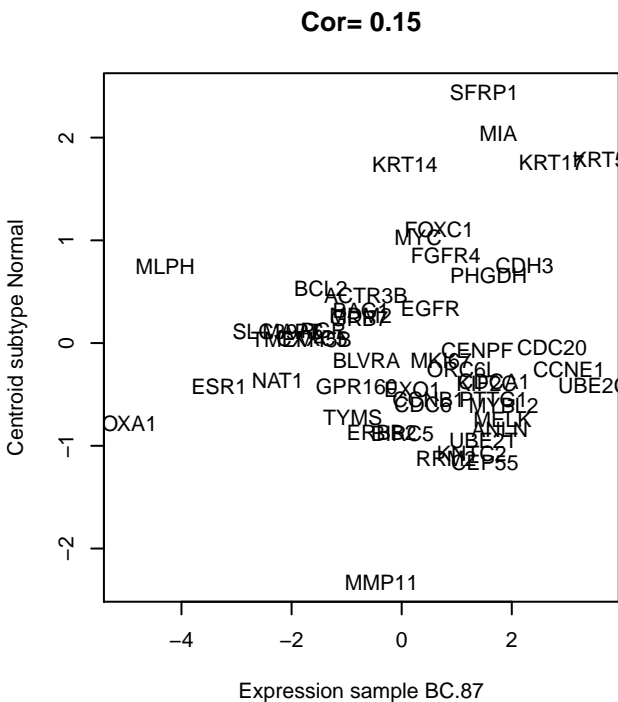

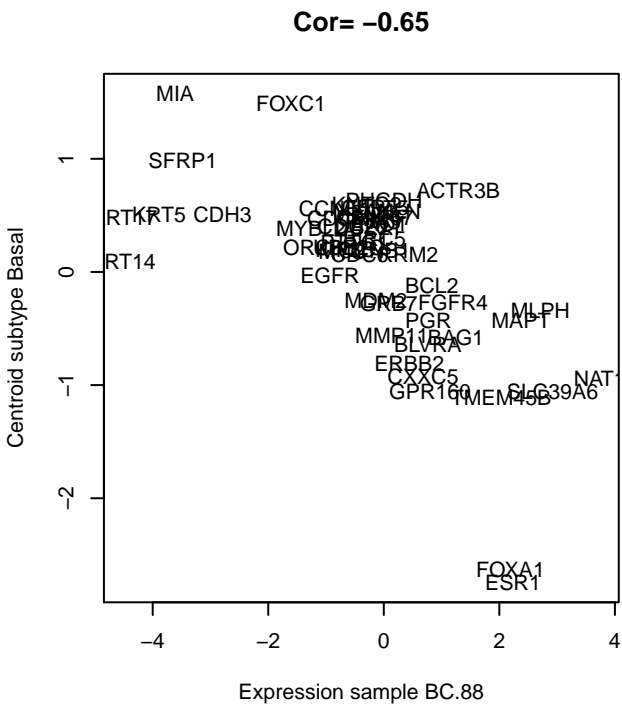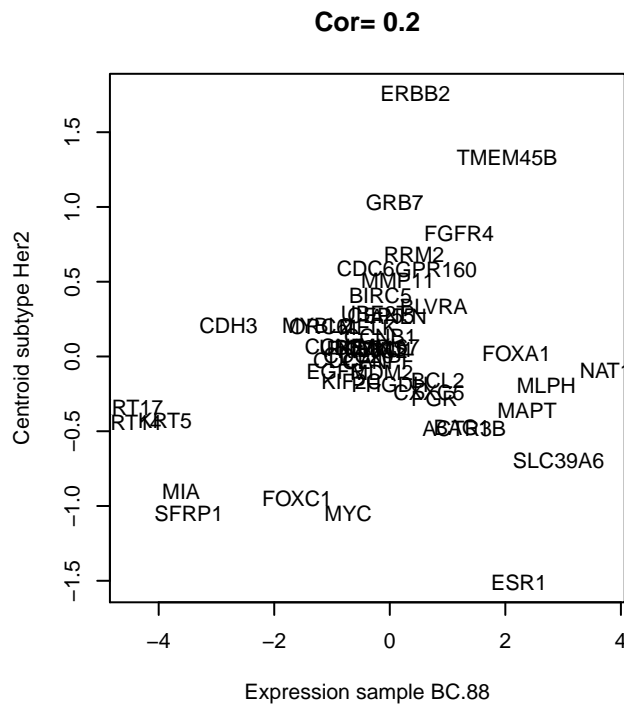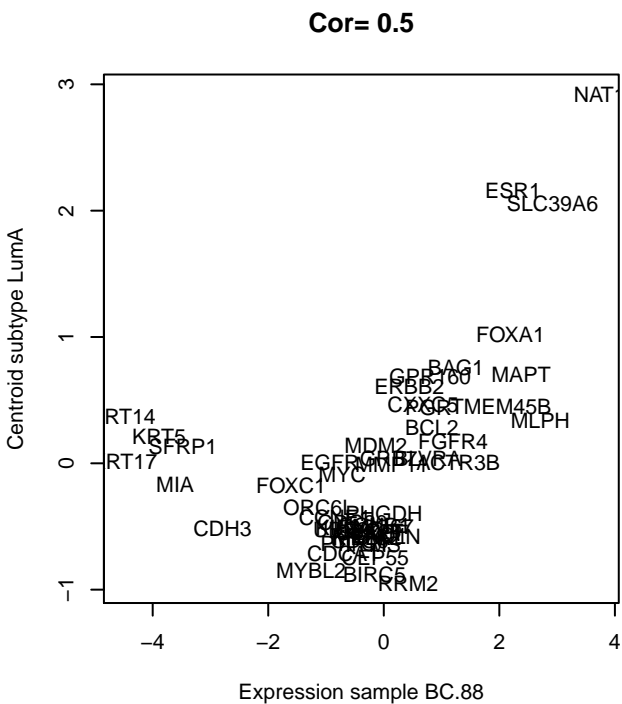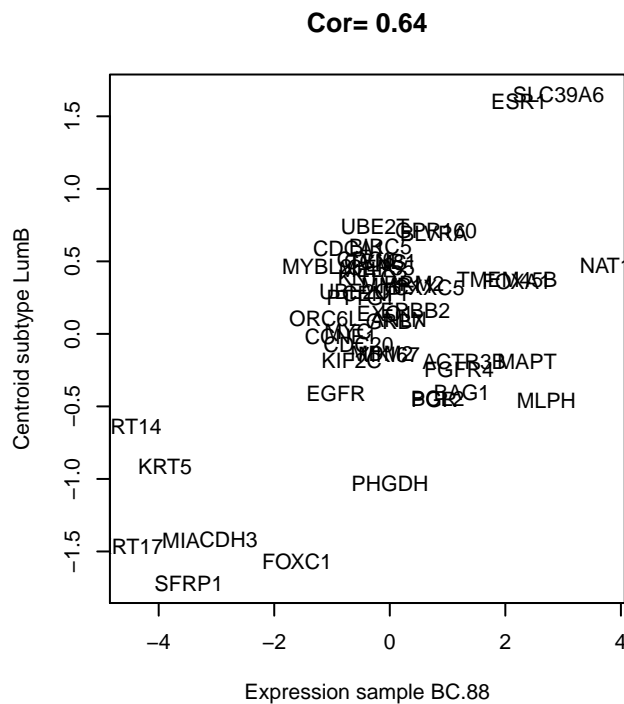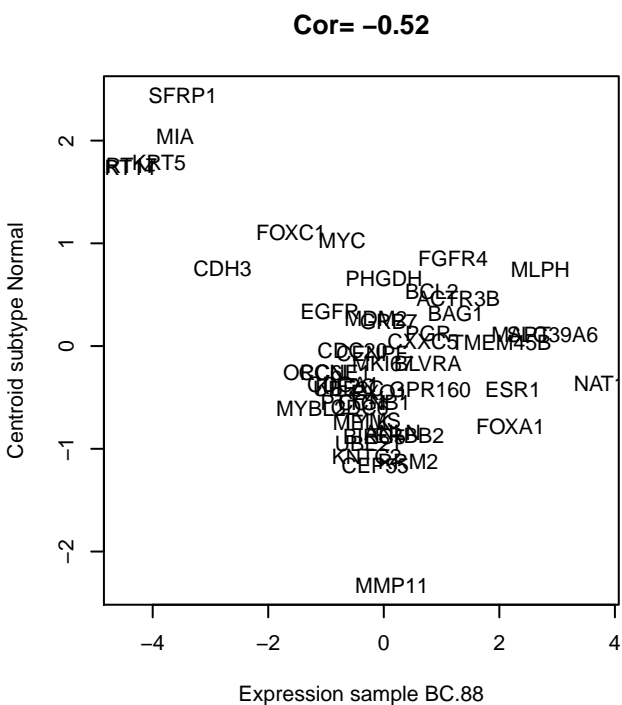





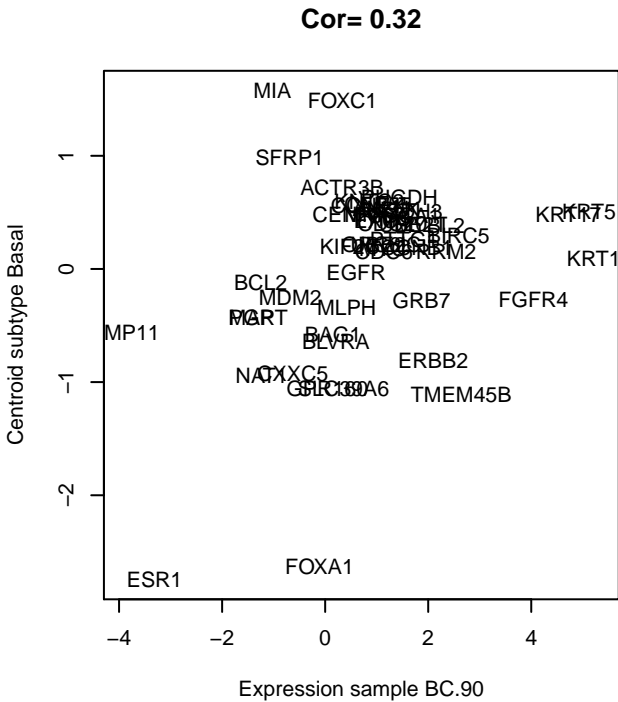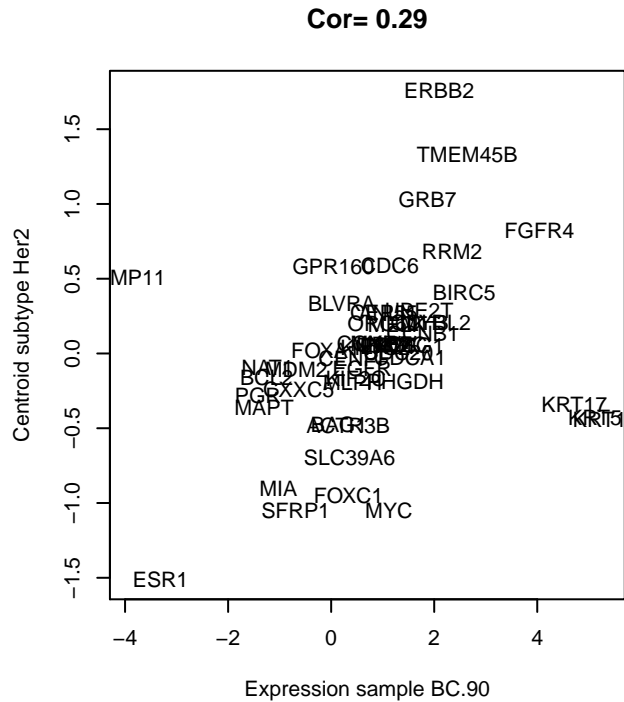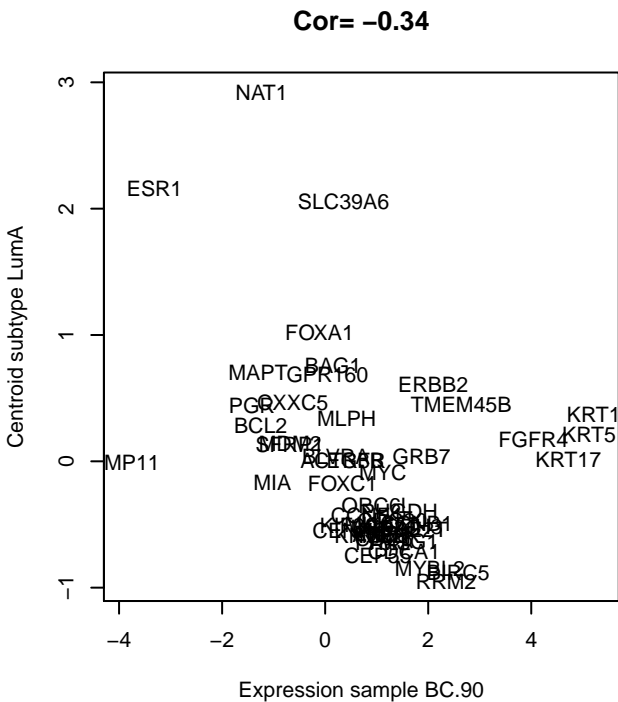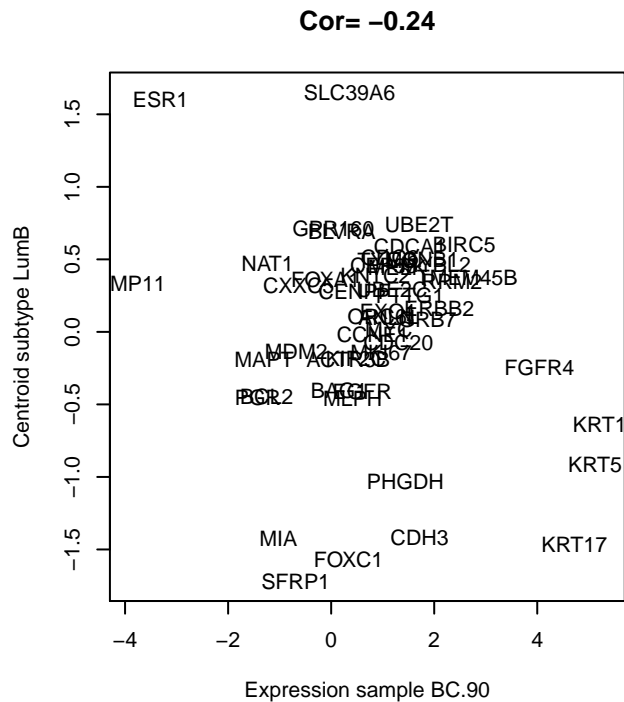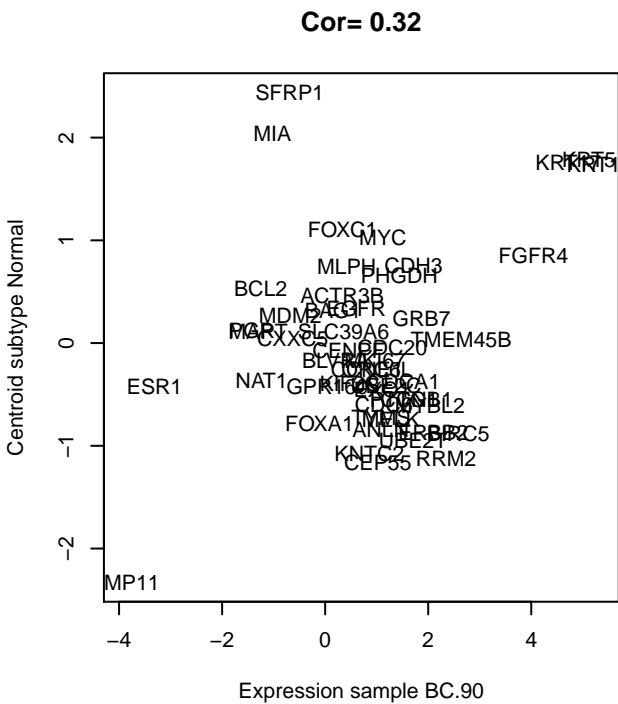



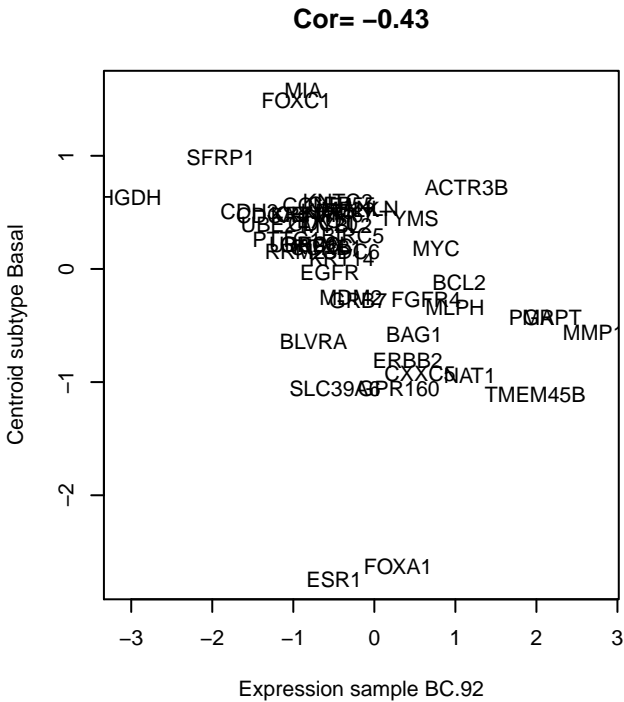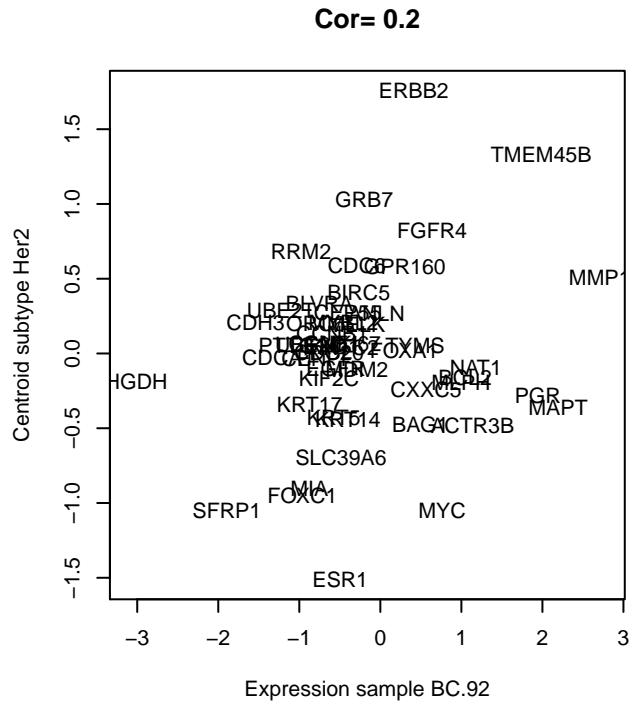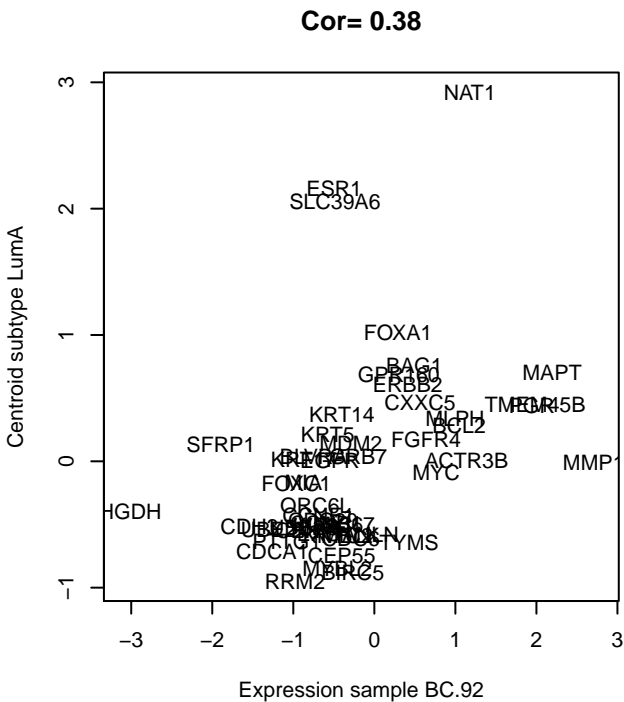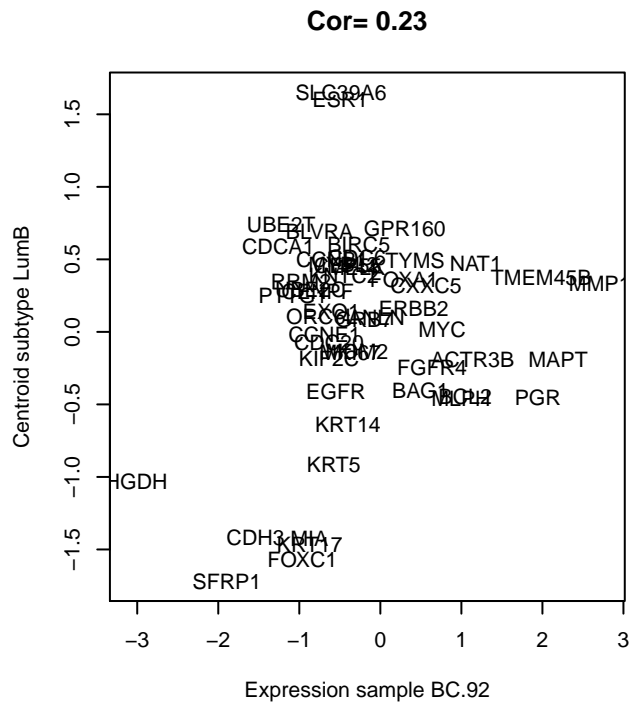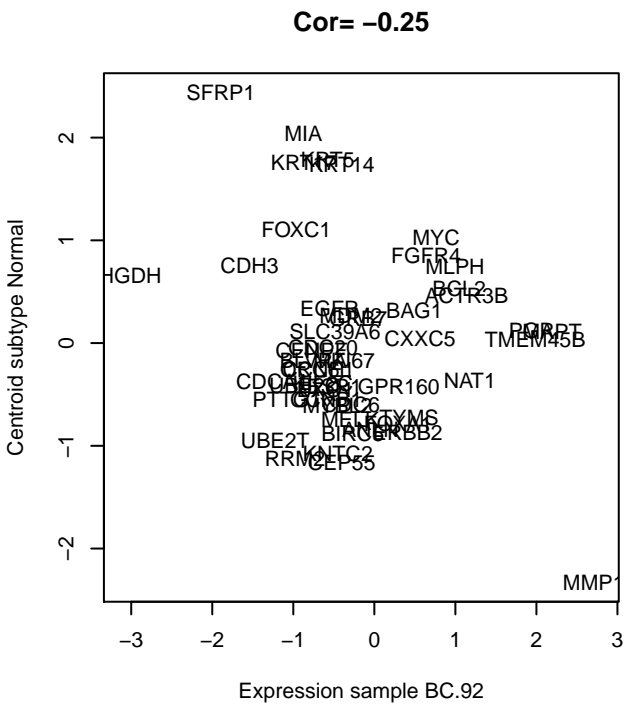

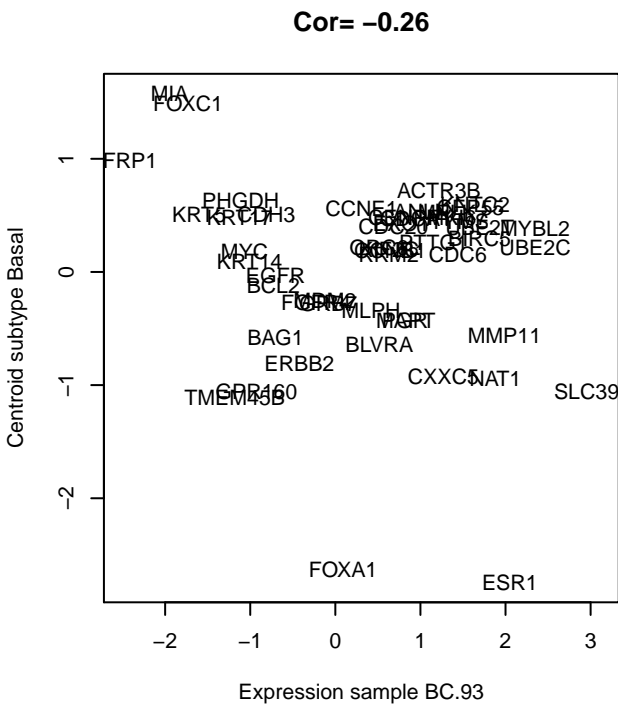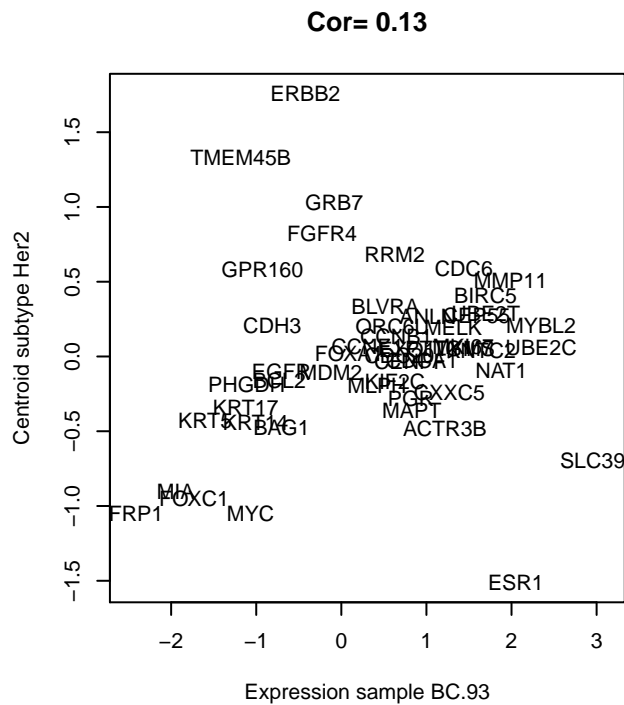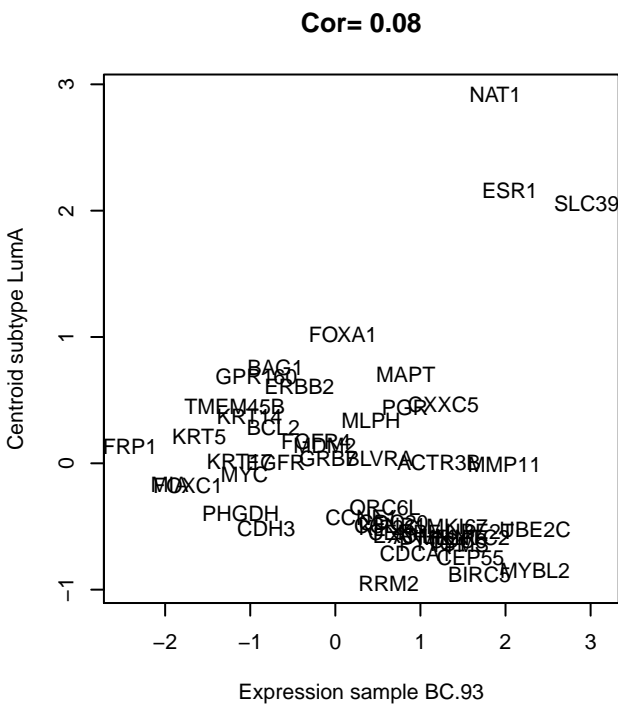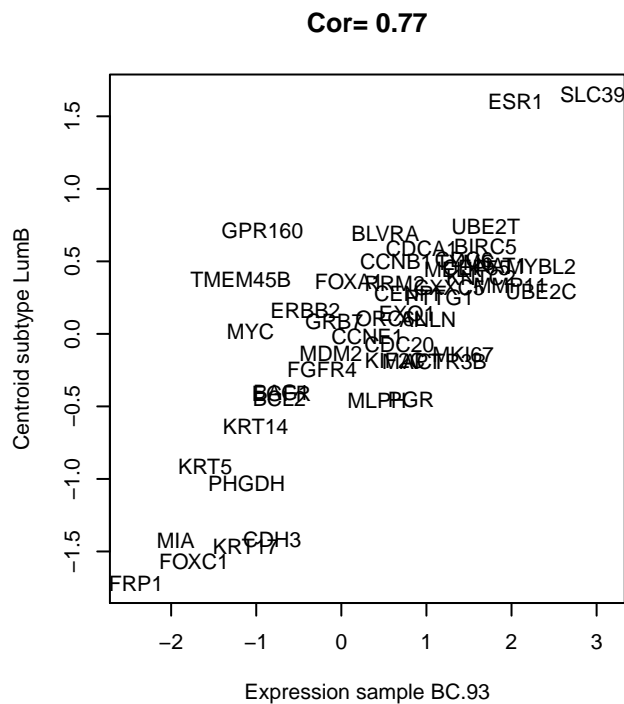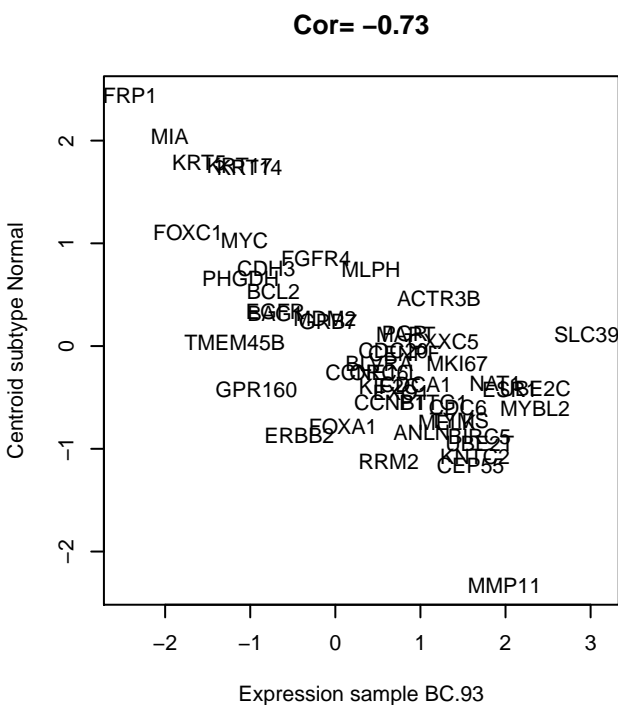

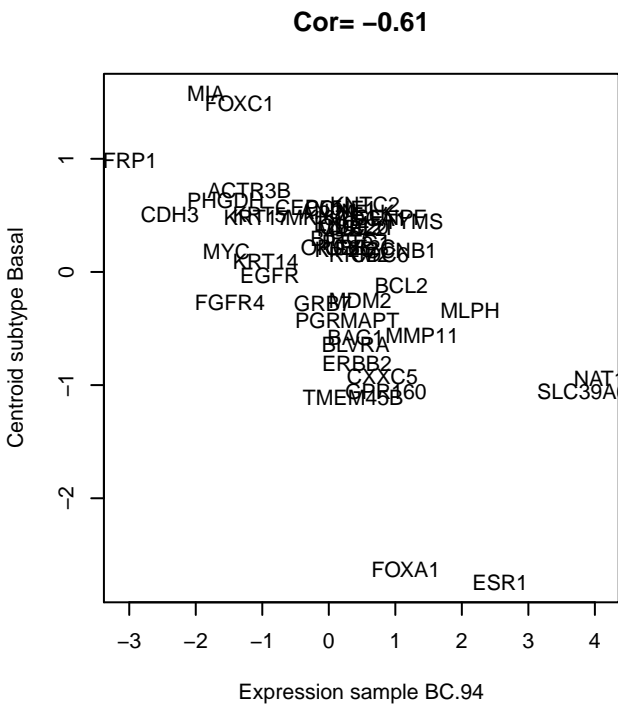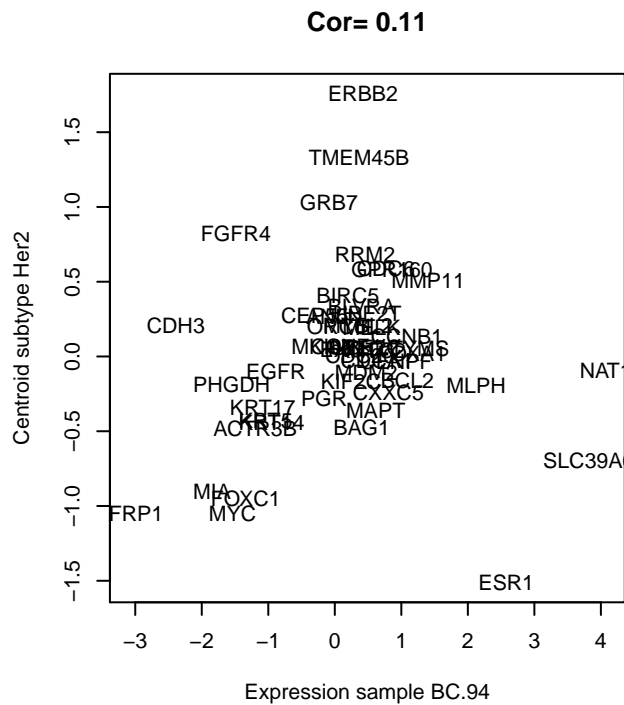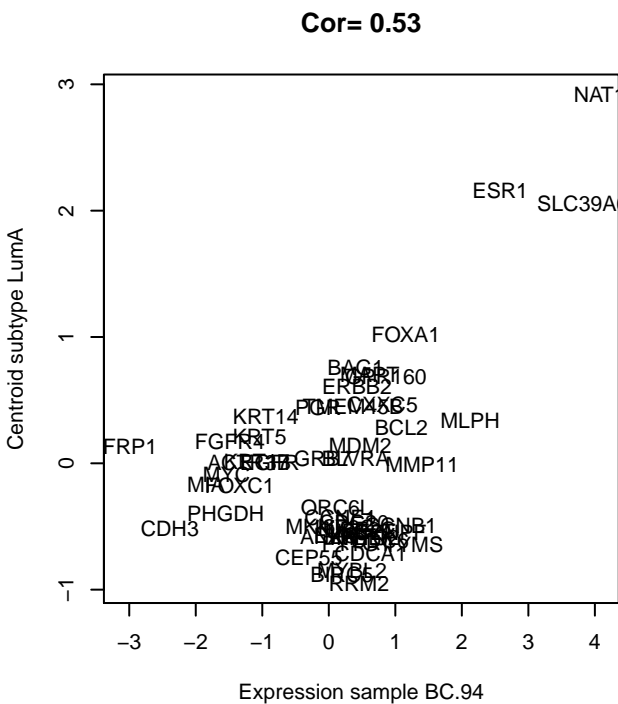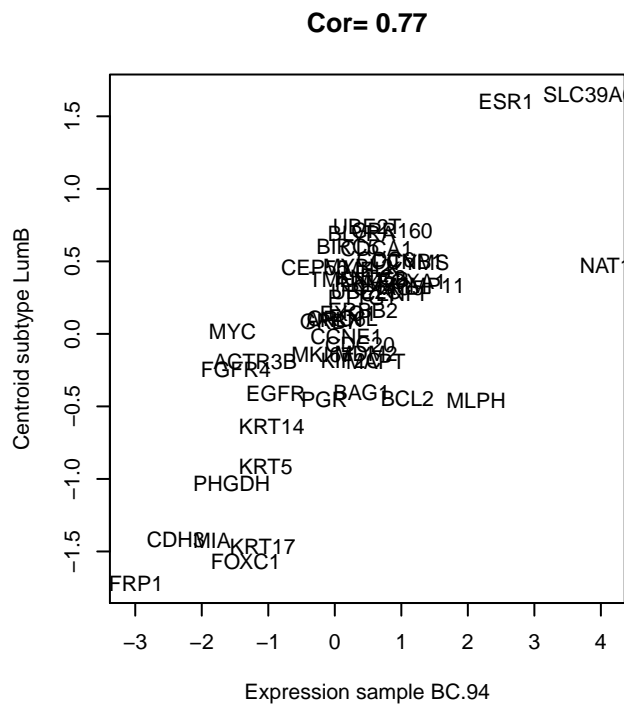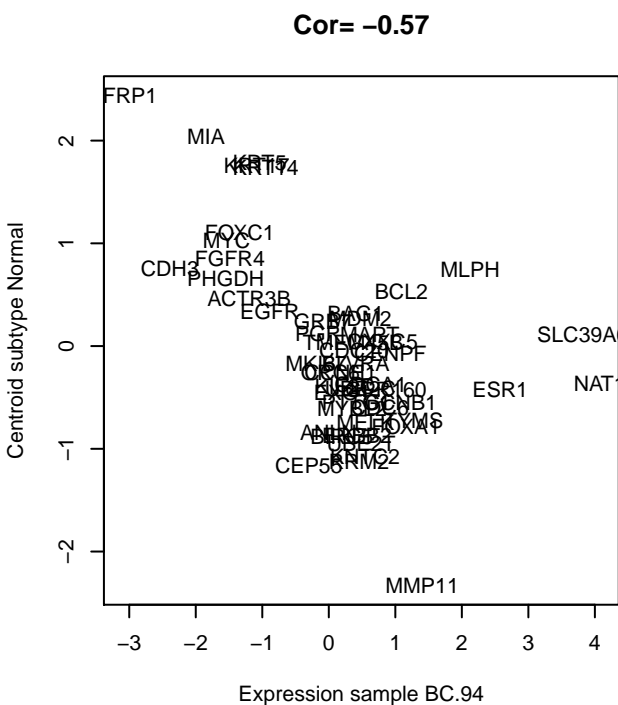

Supplement: s1 [file s1]

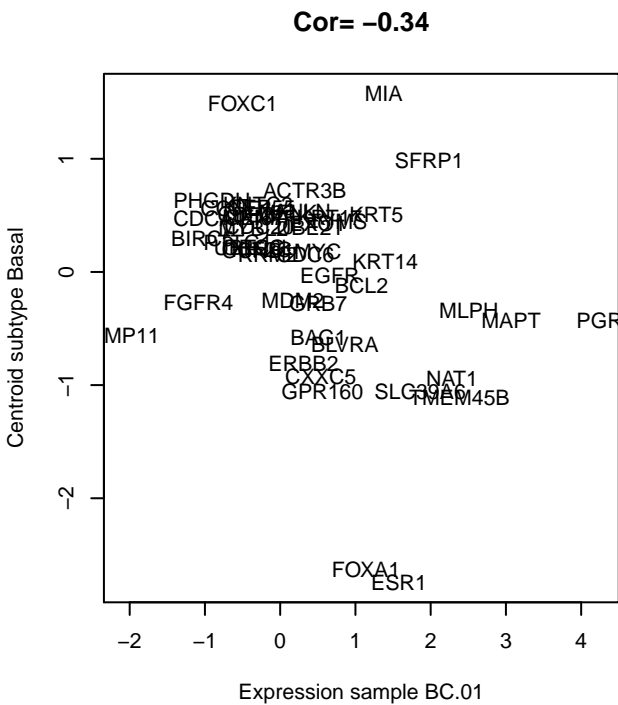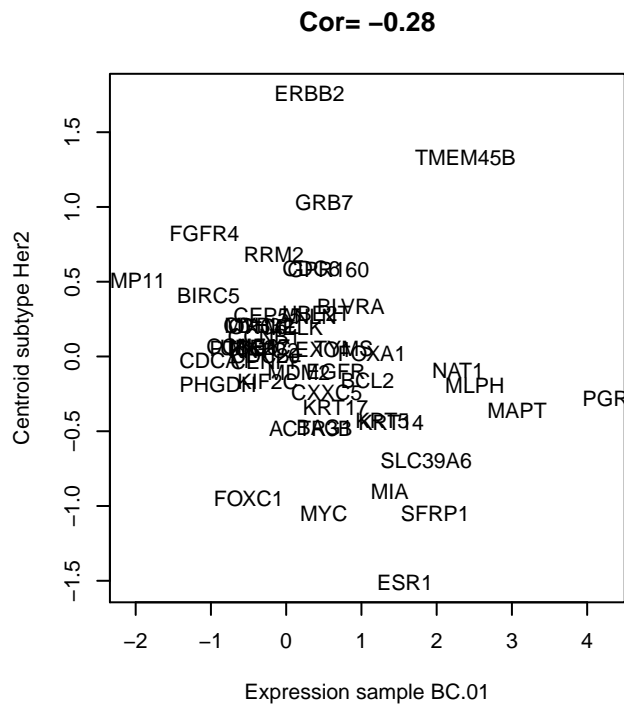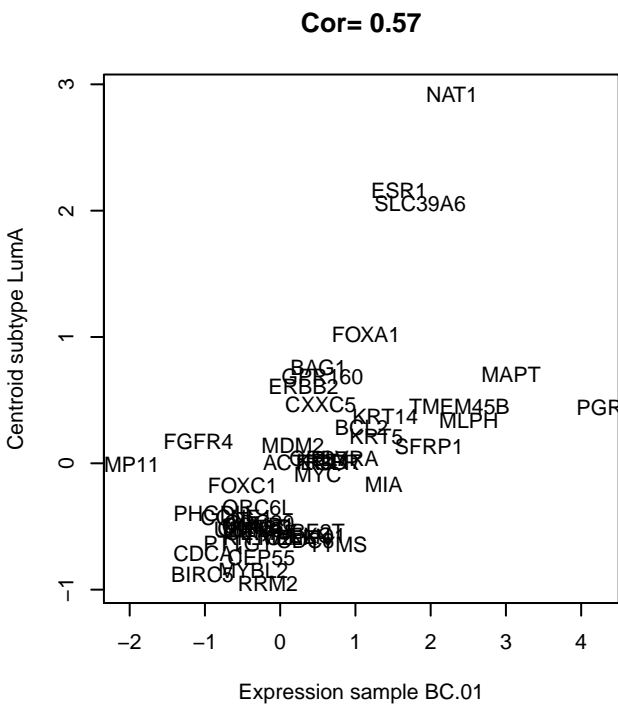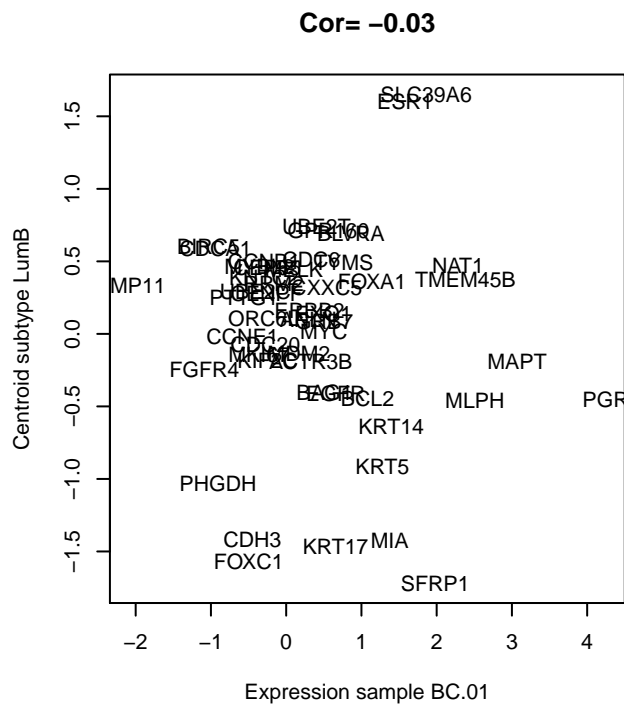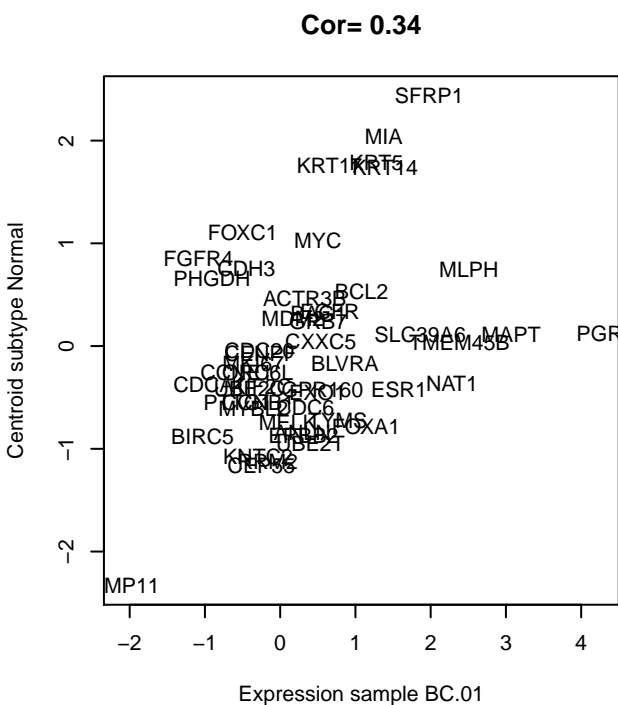



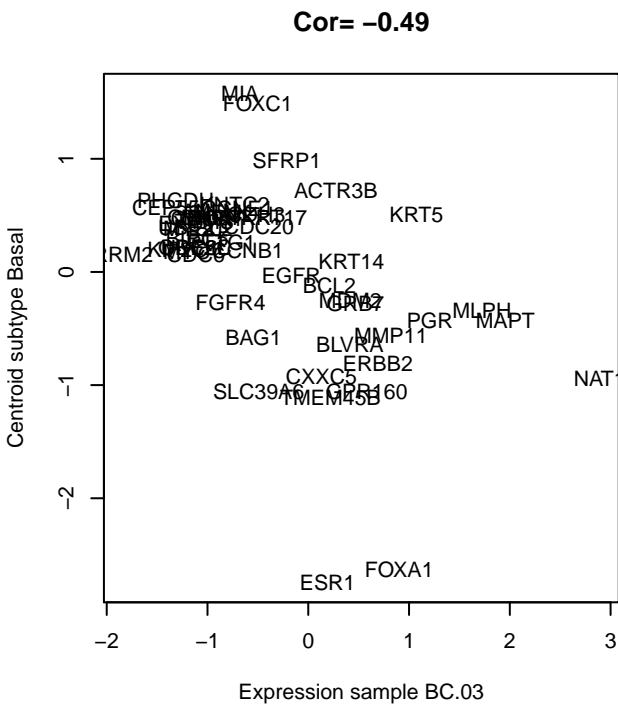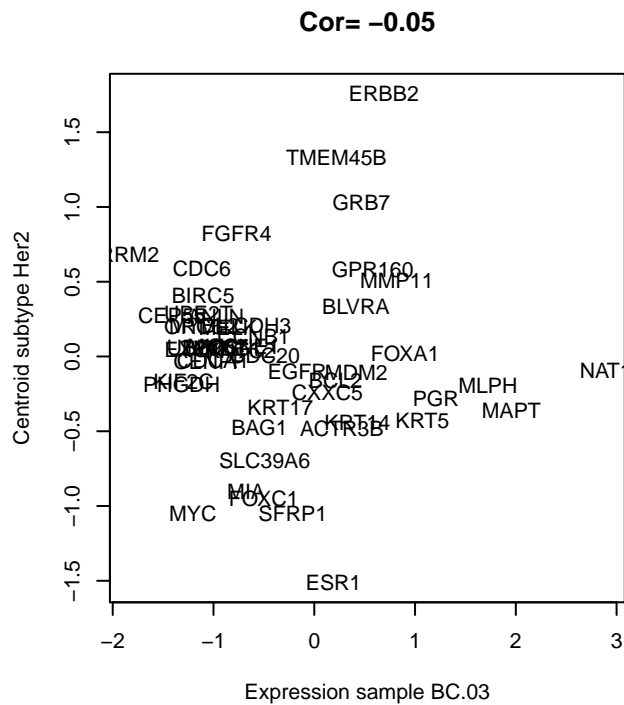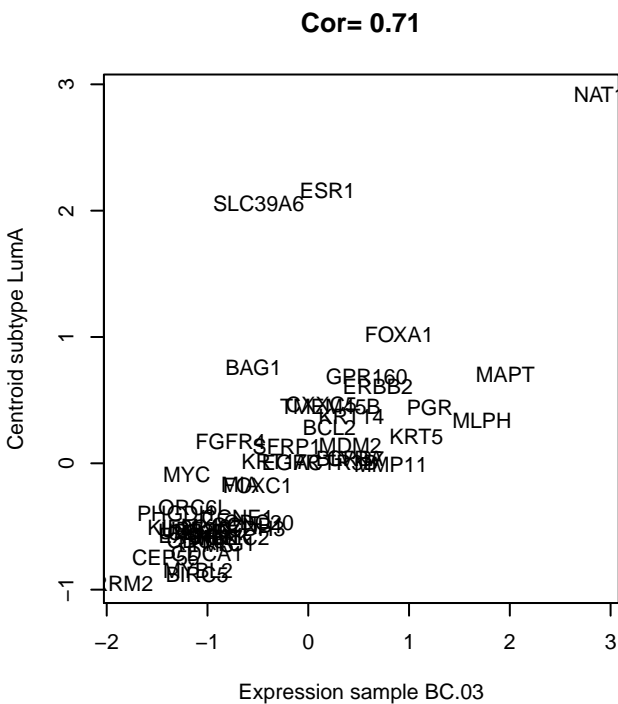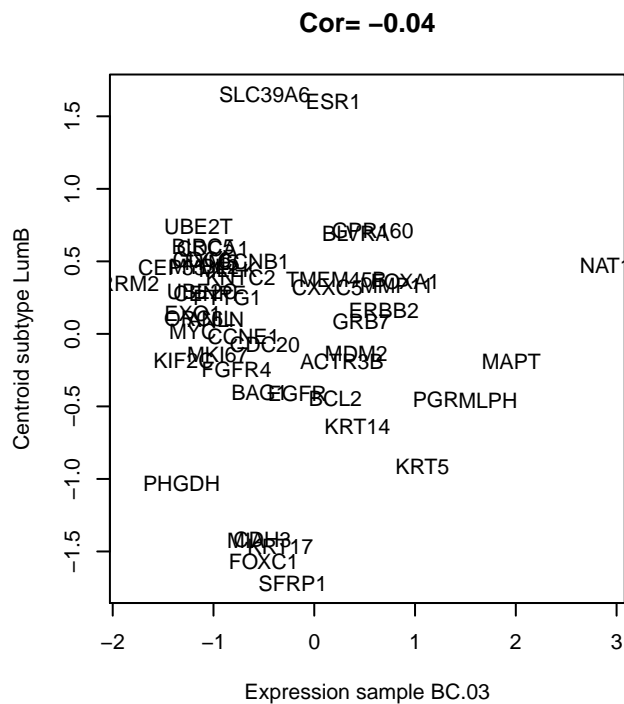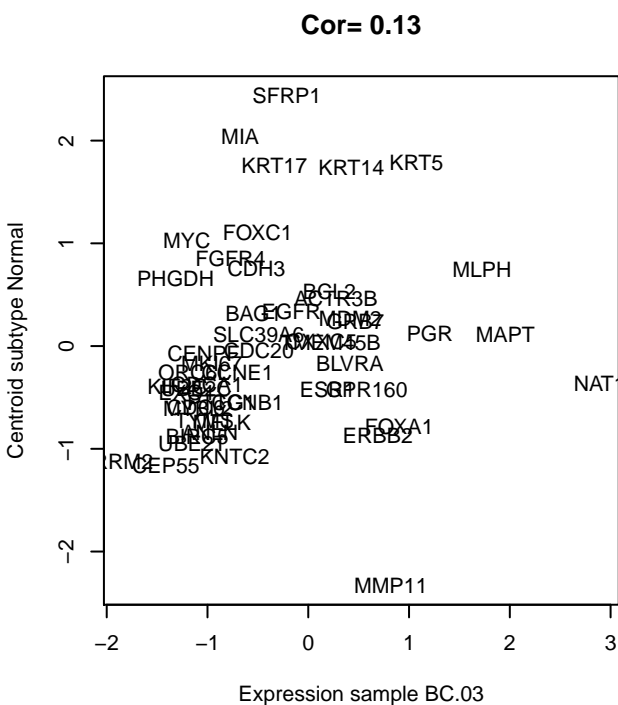

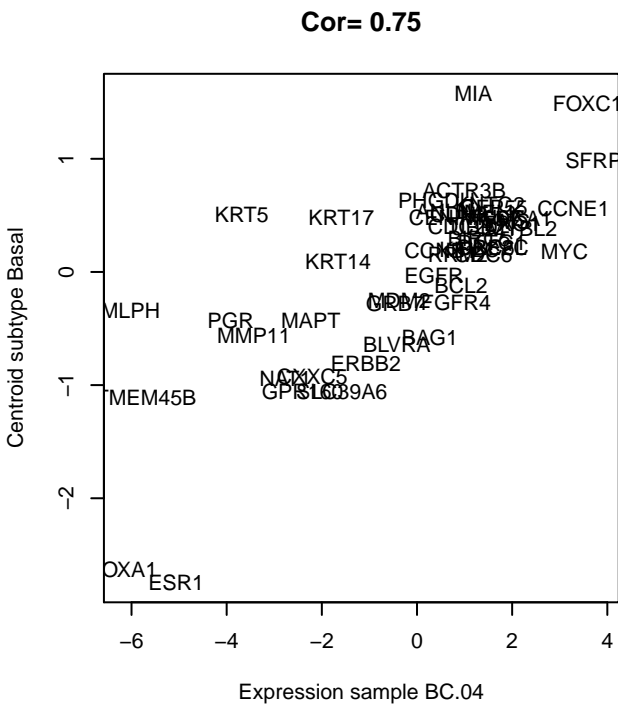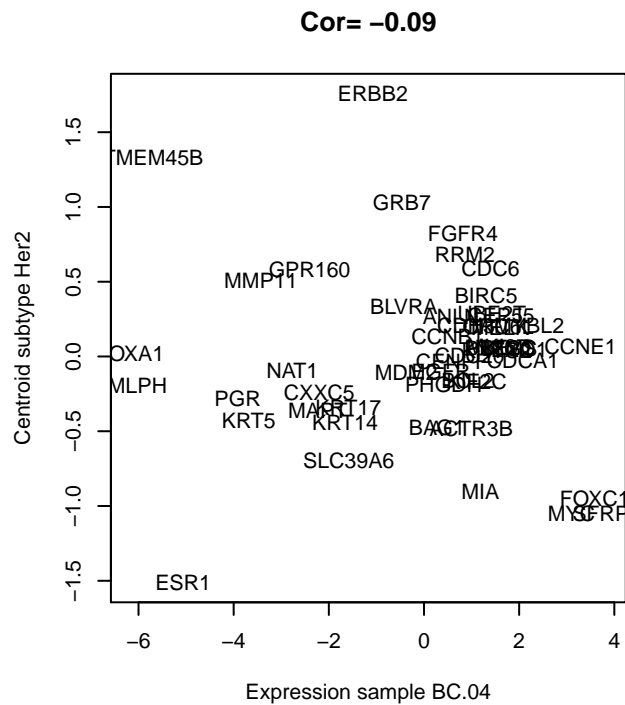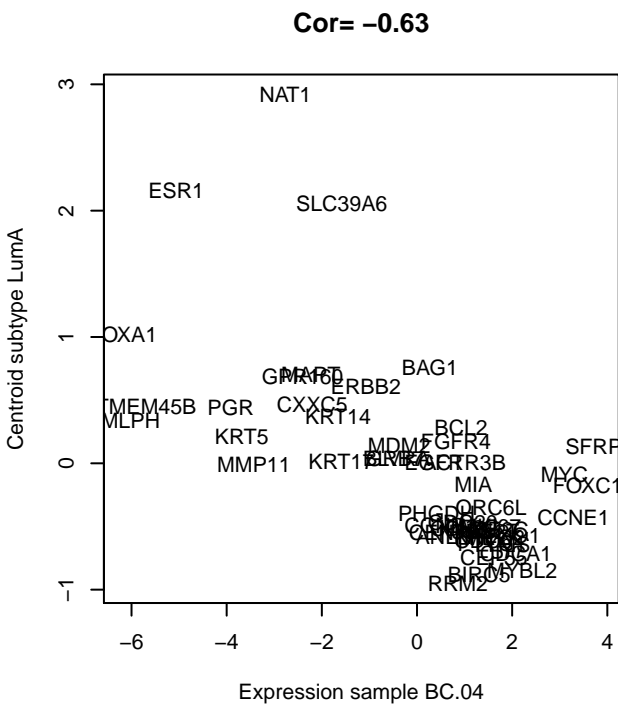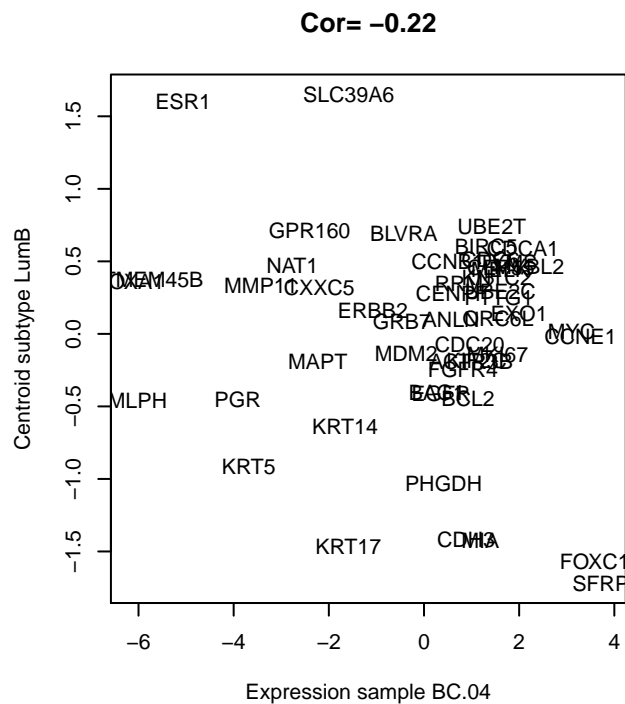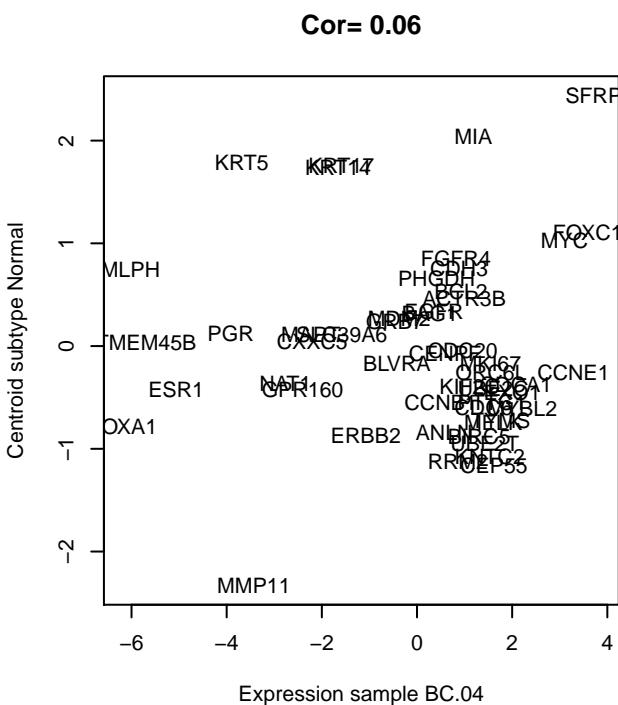

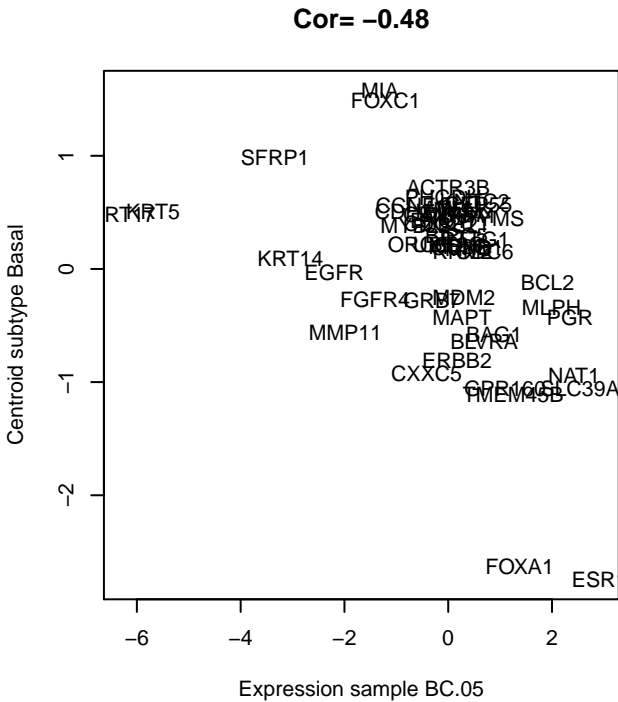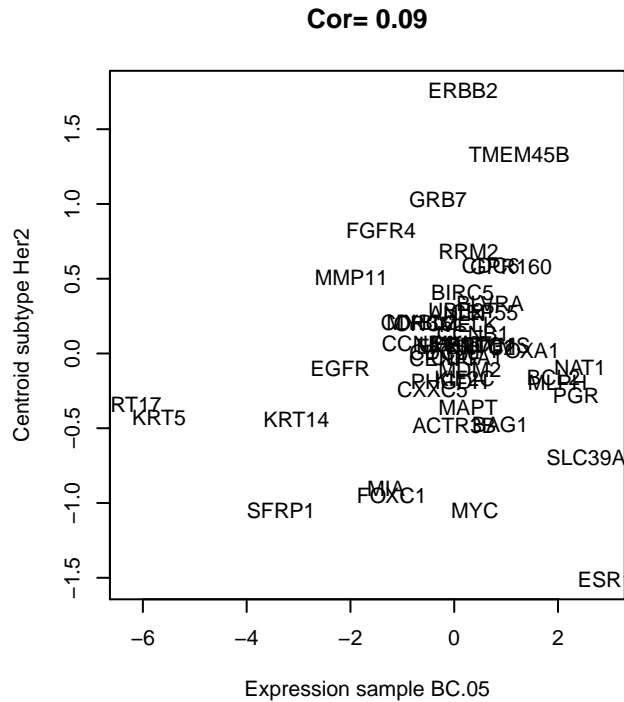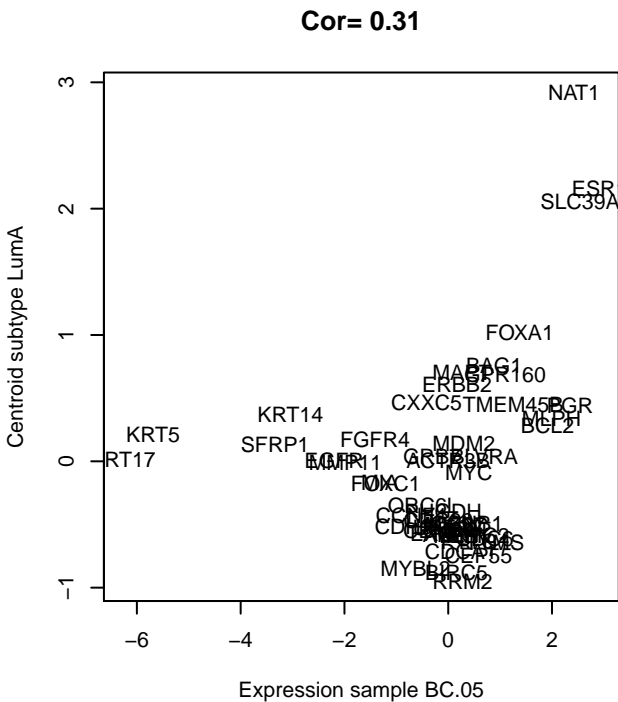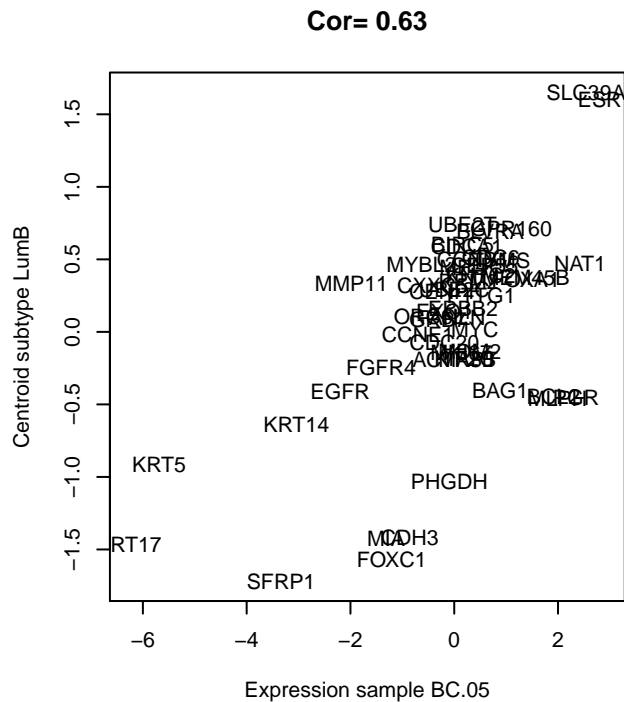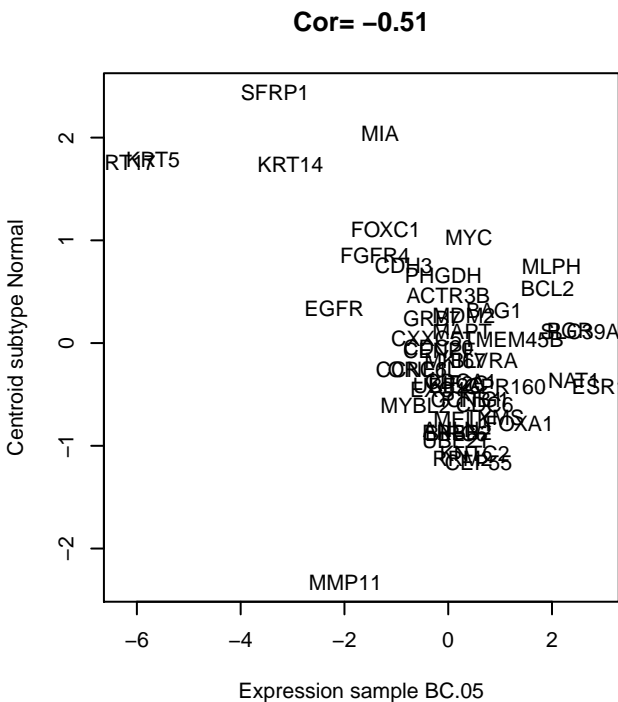

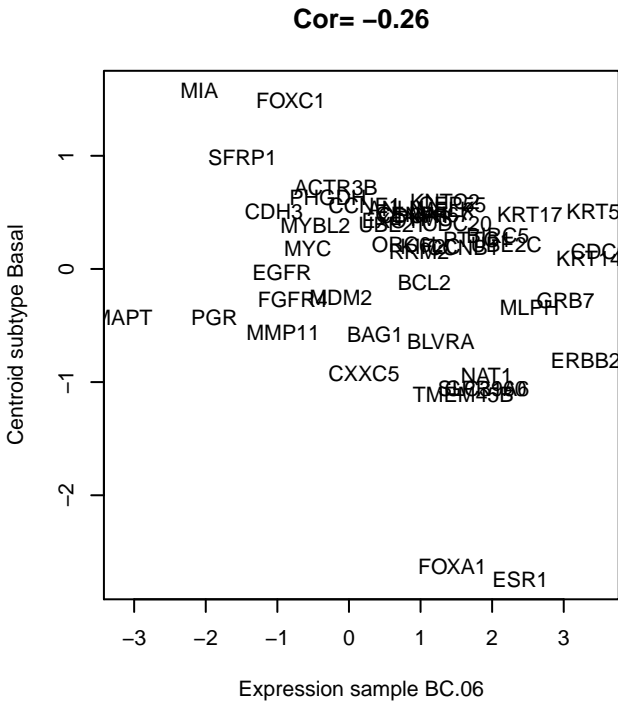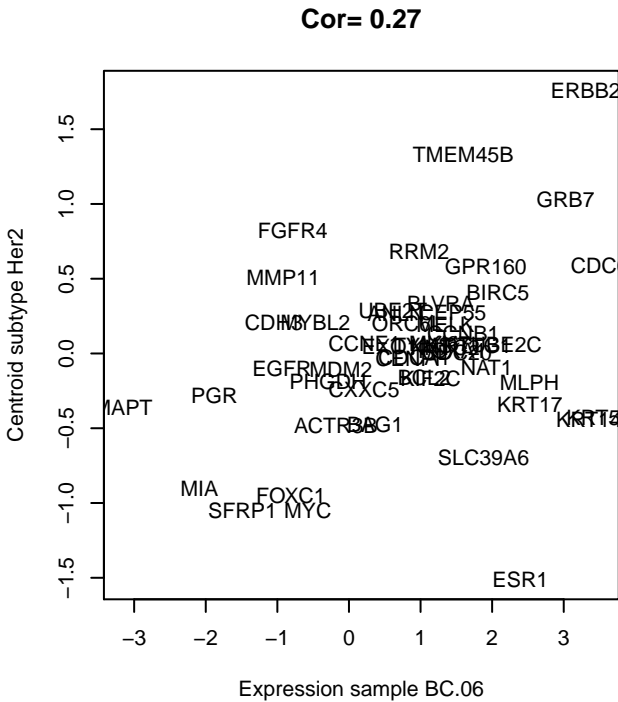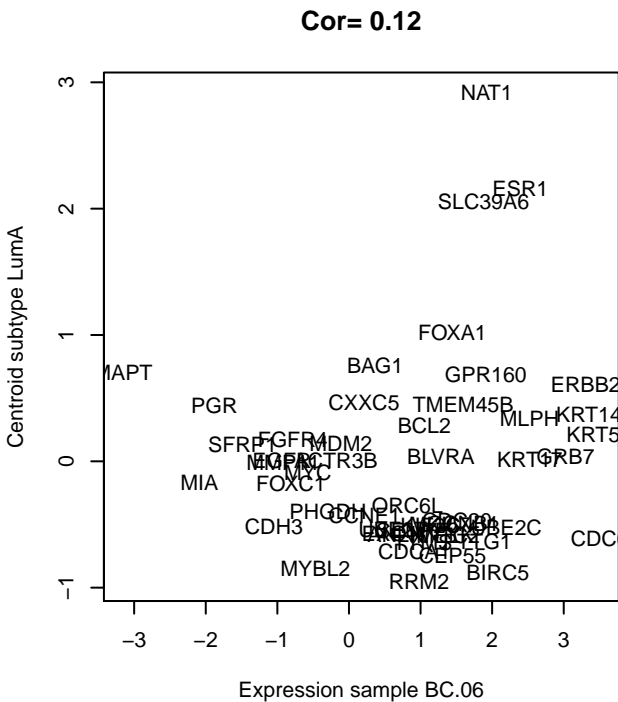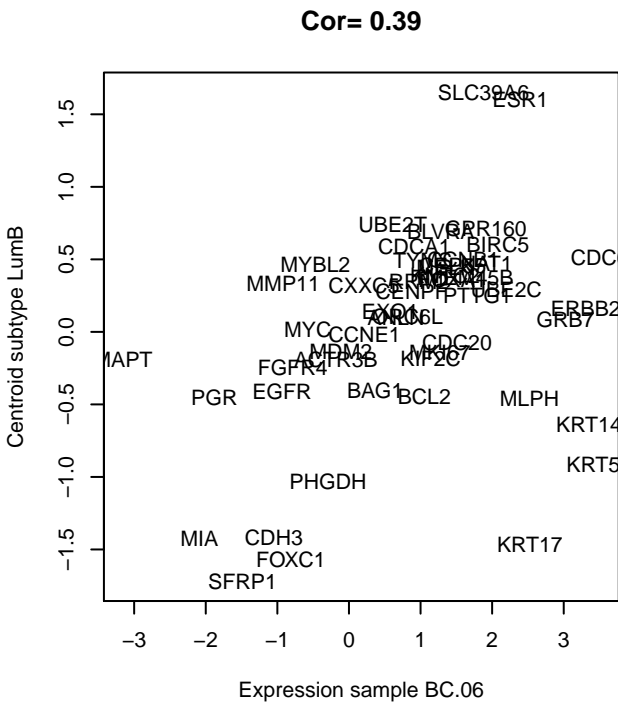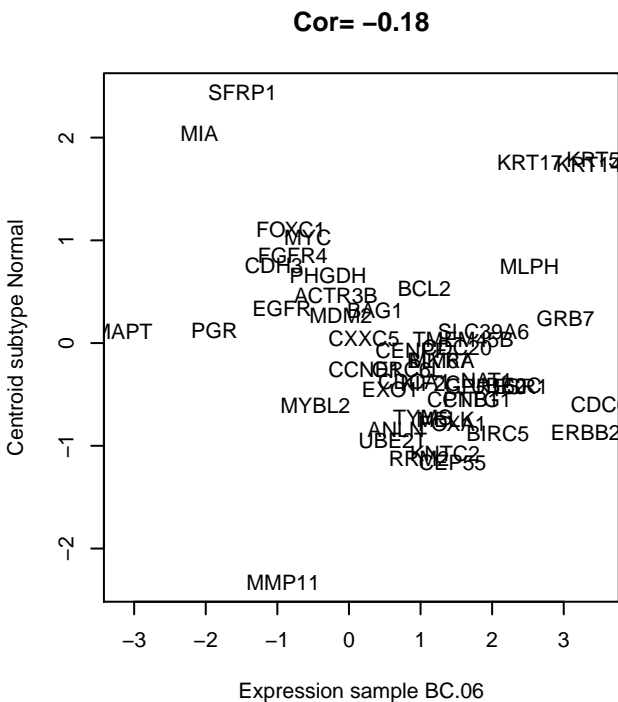







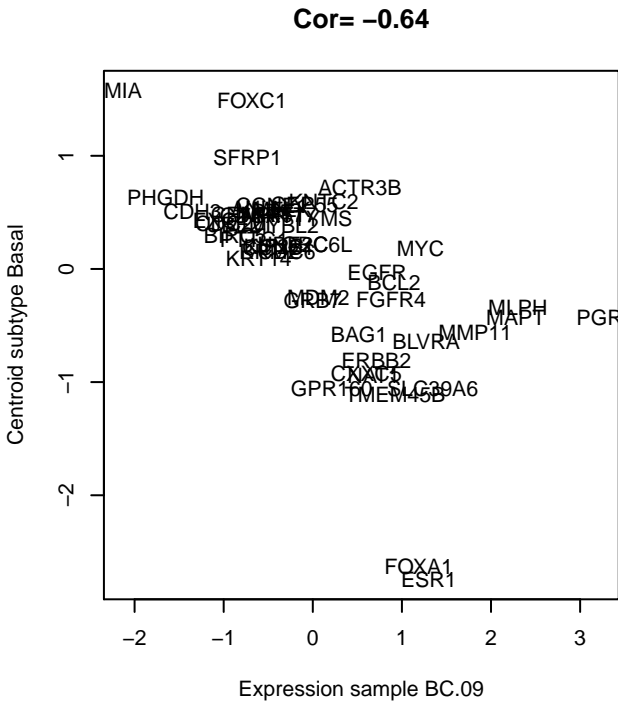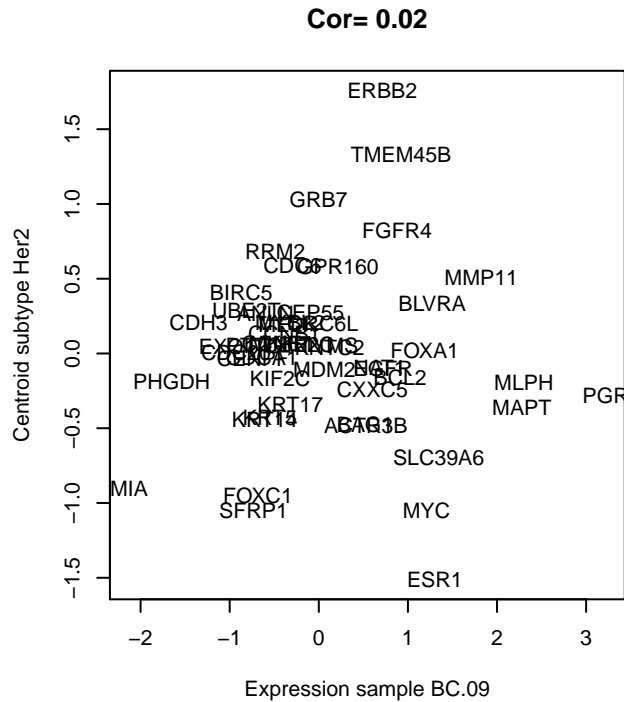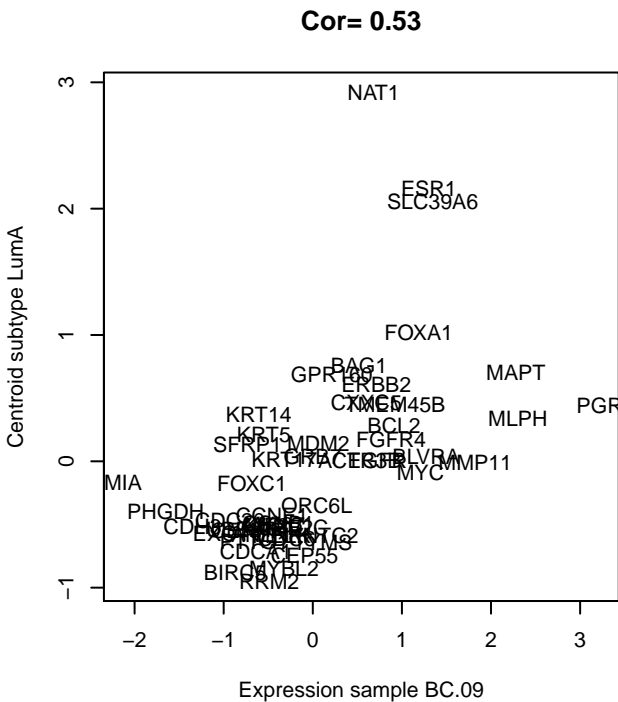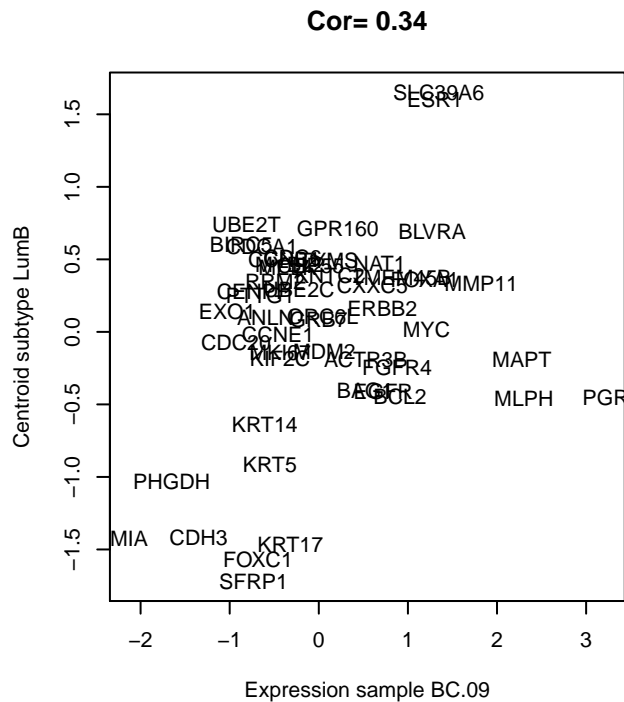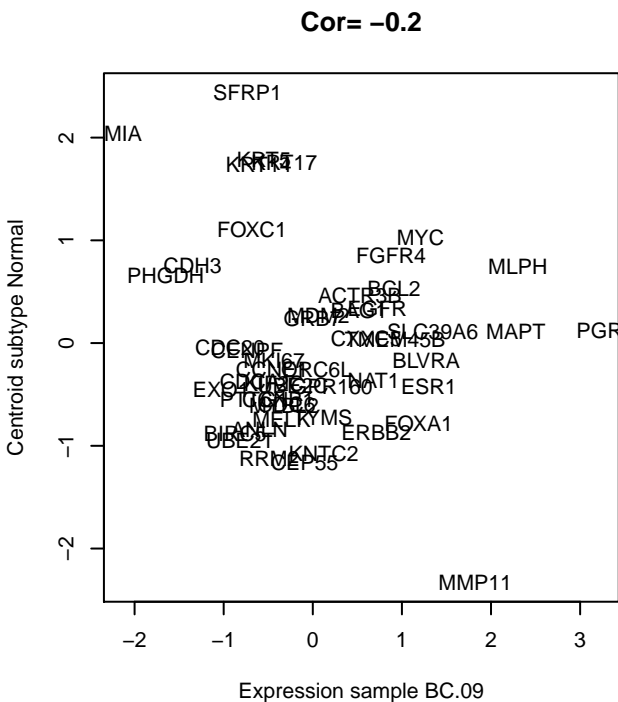

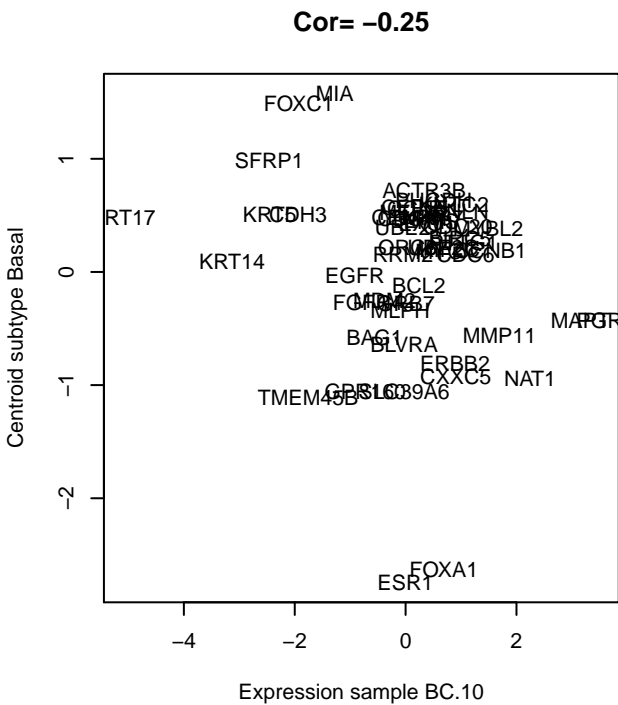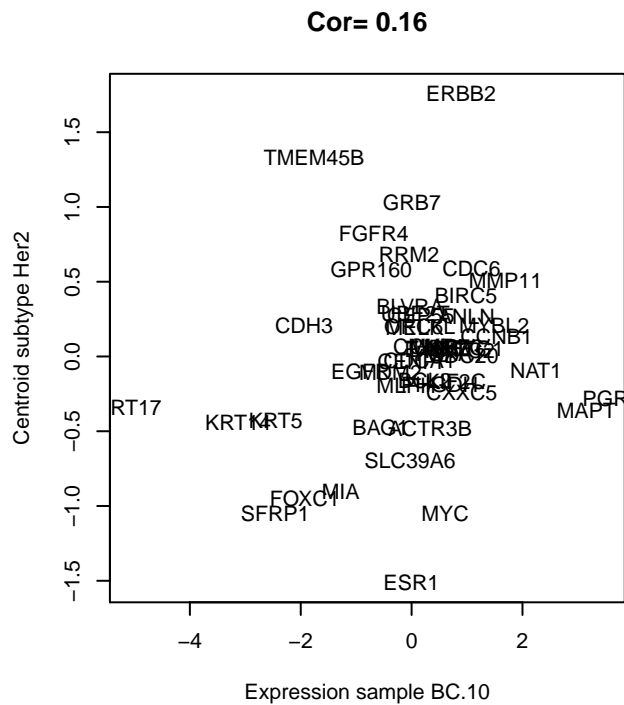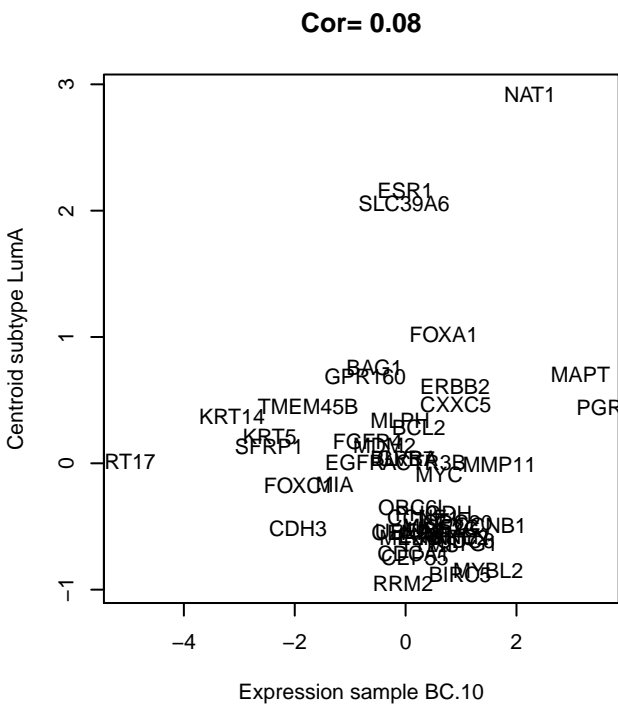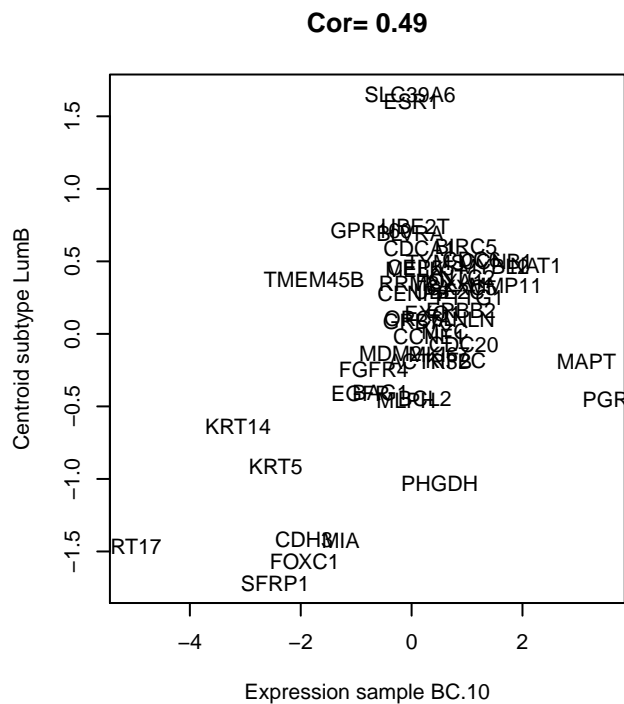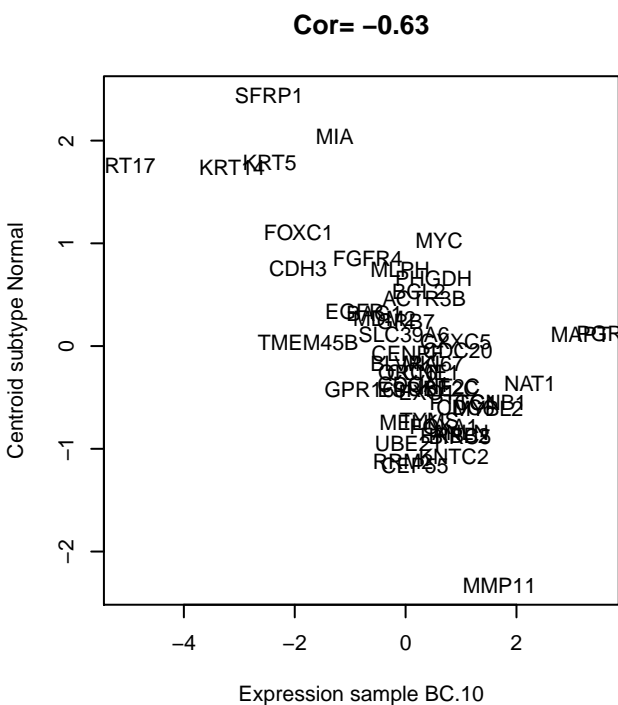

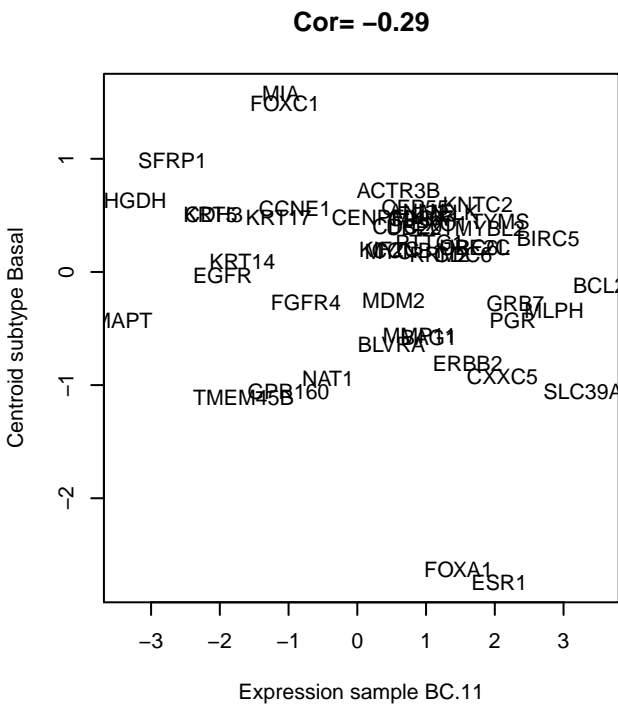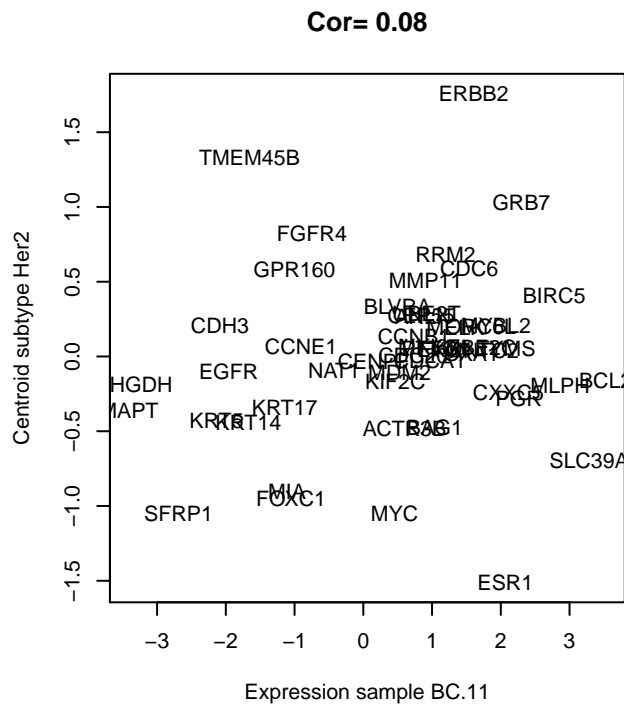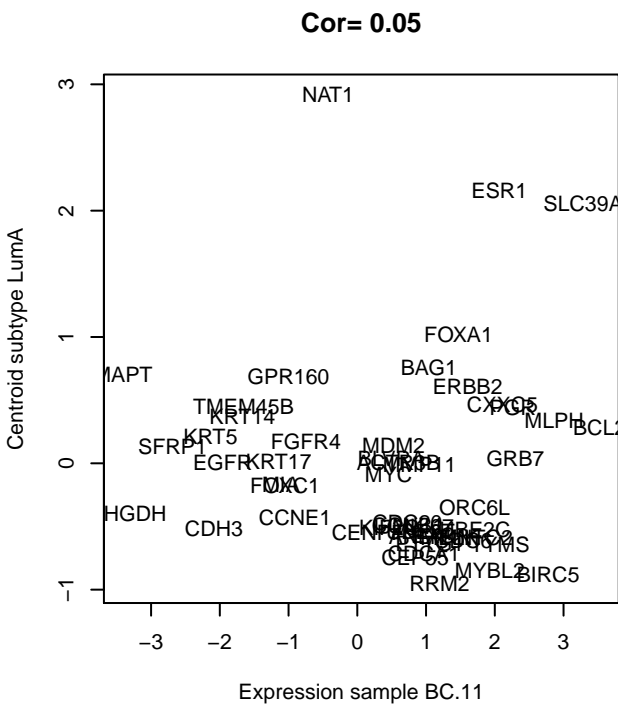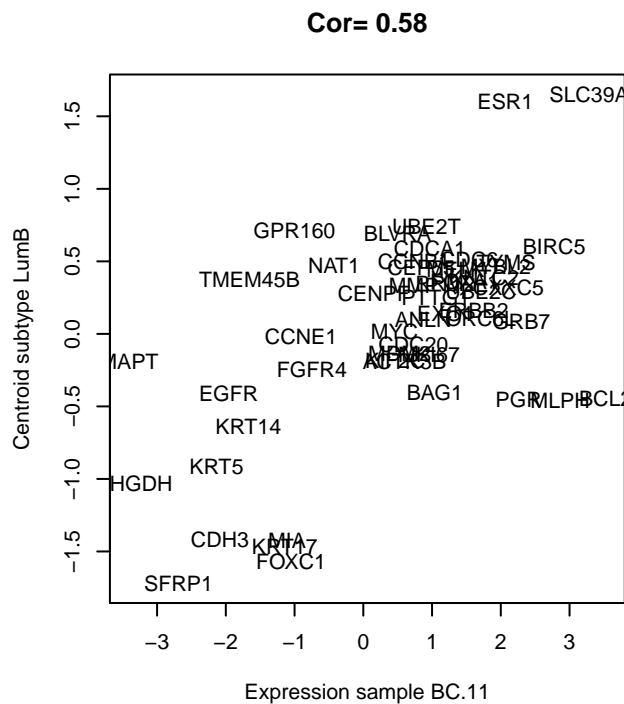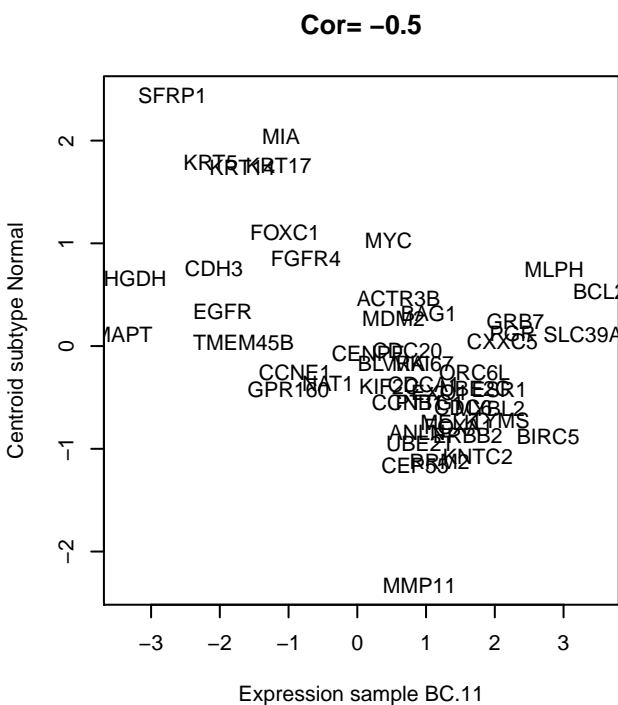

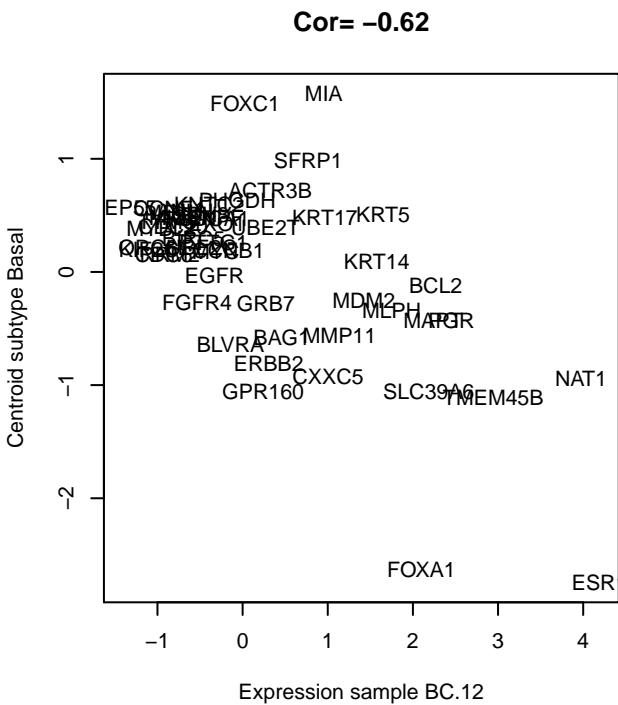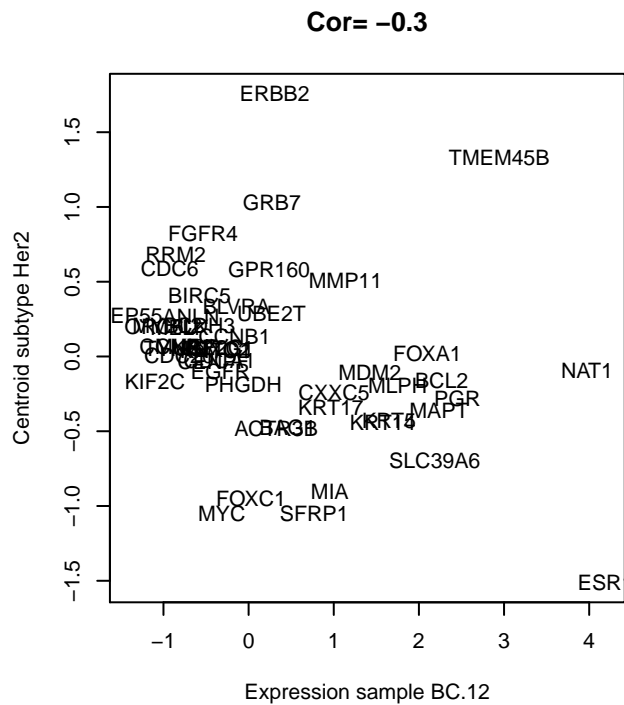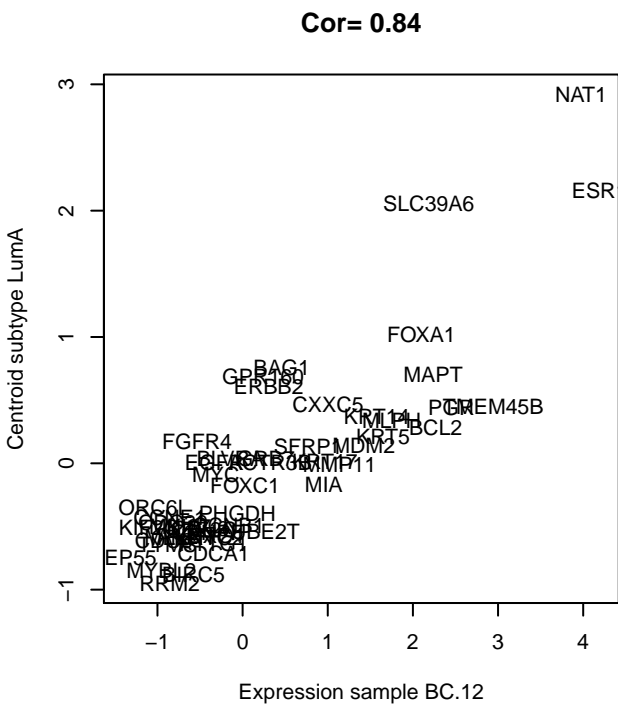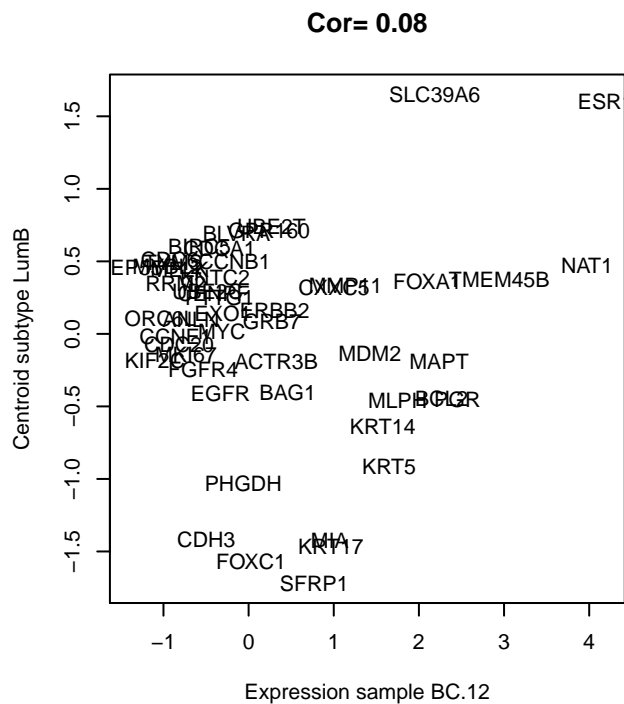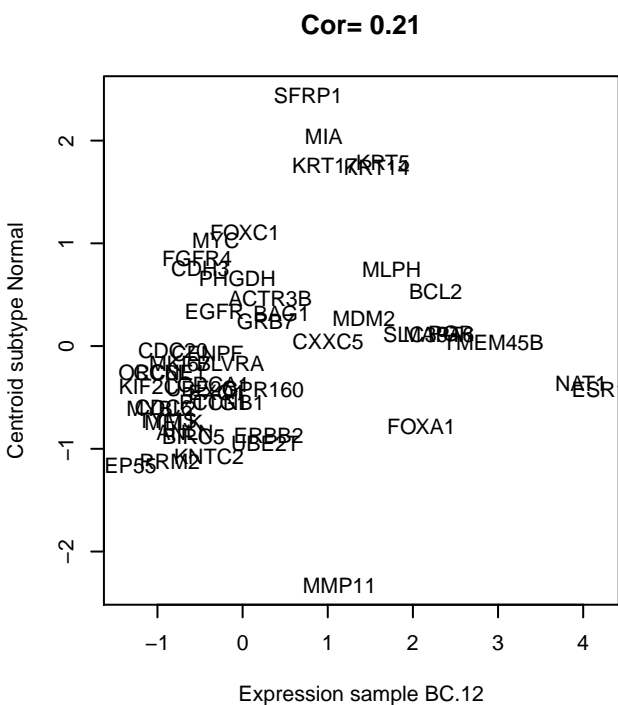

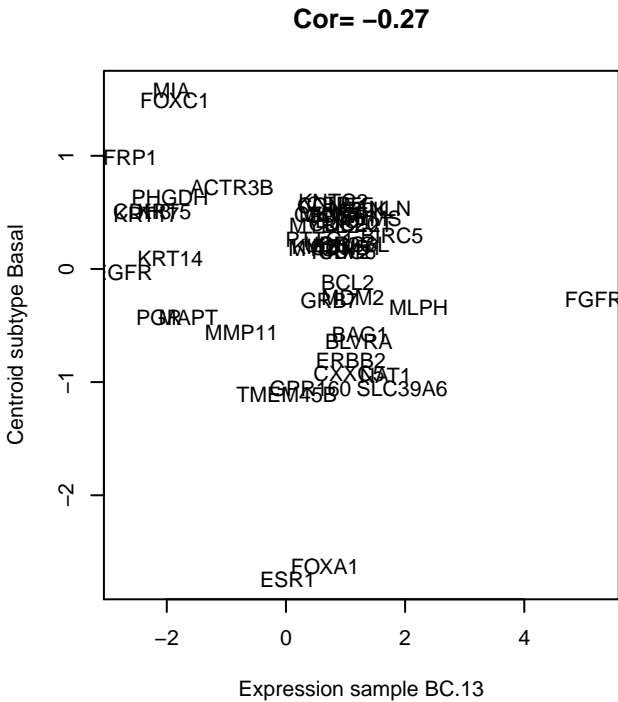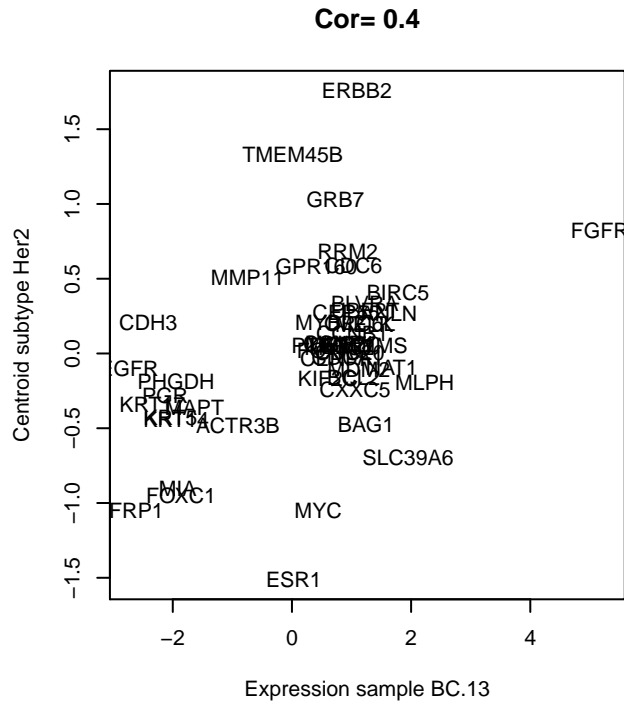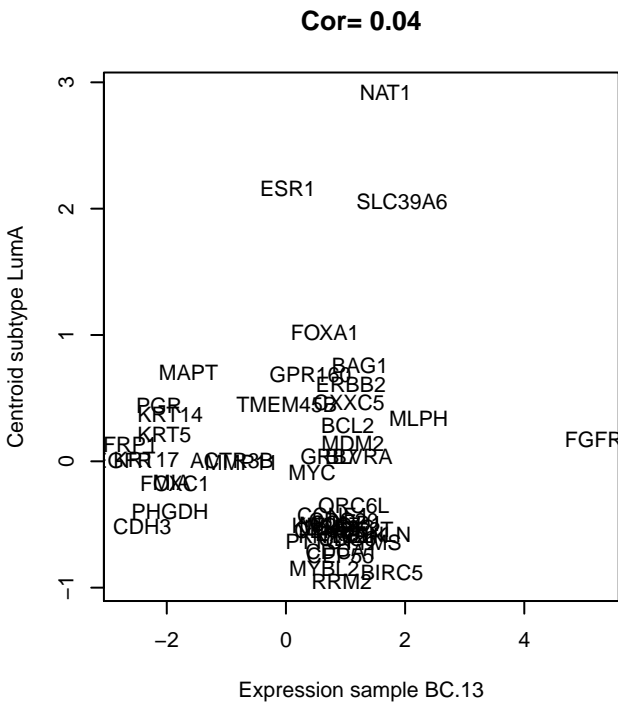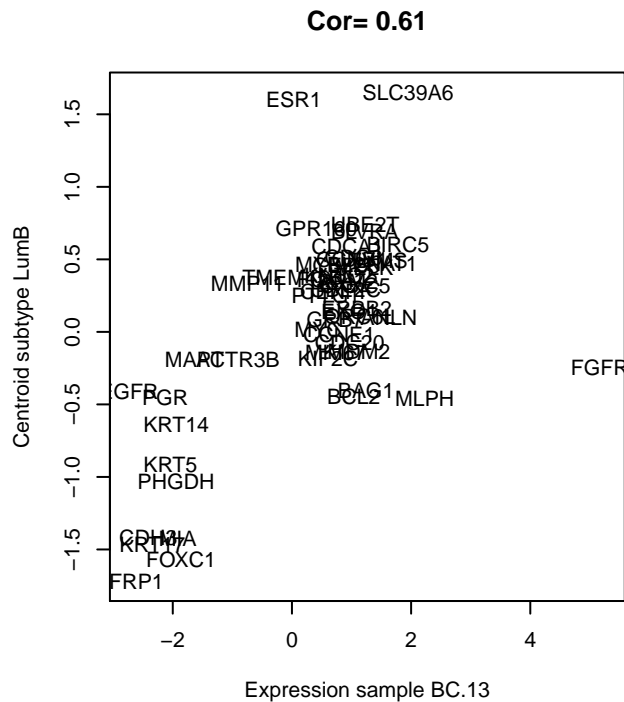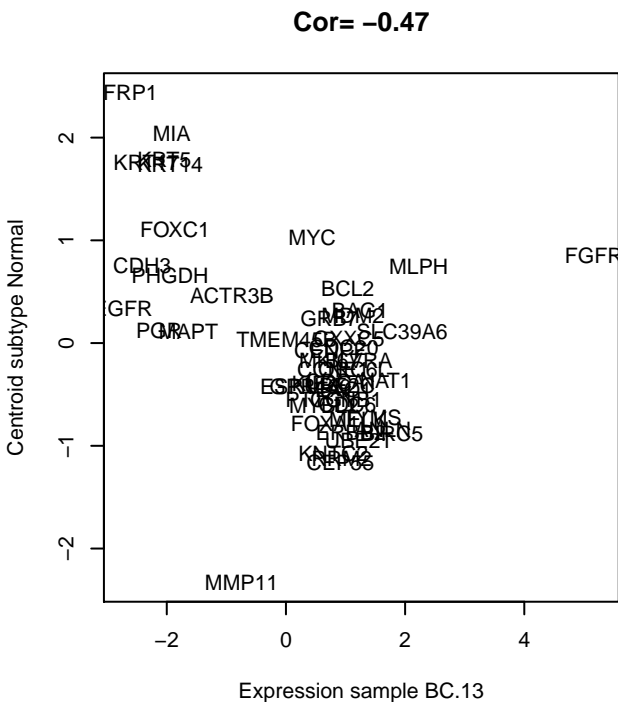

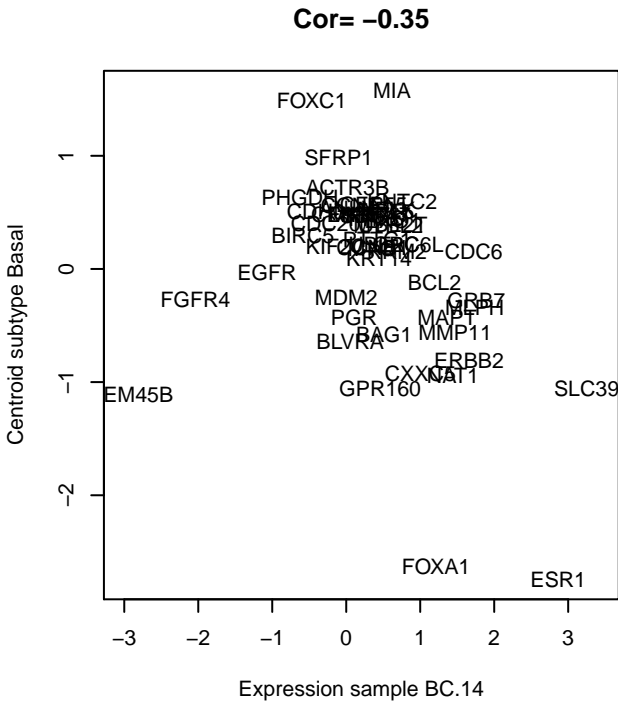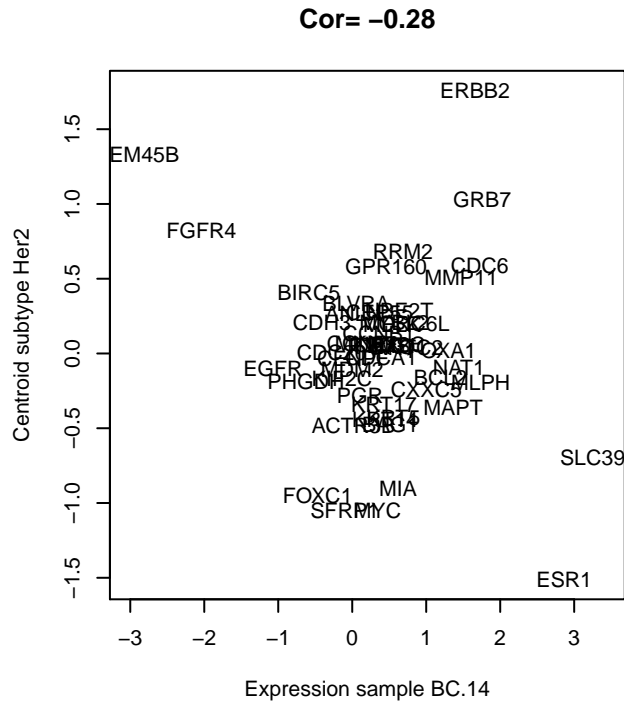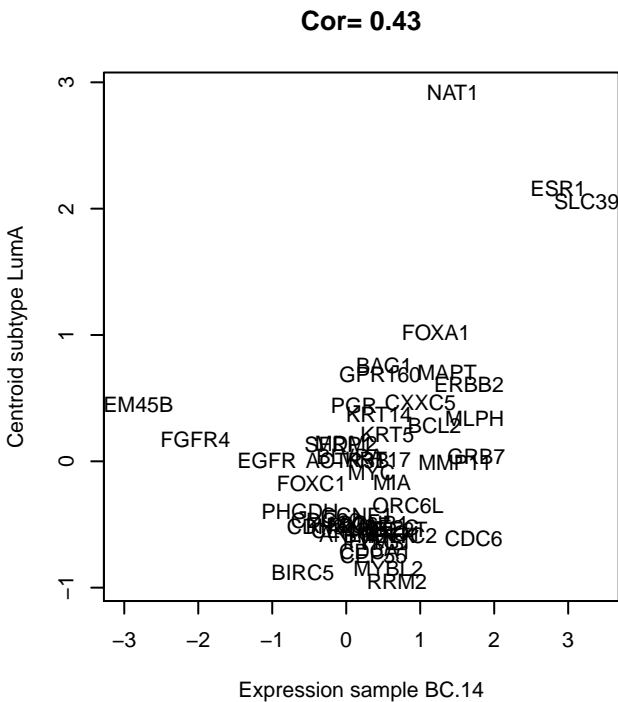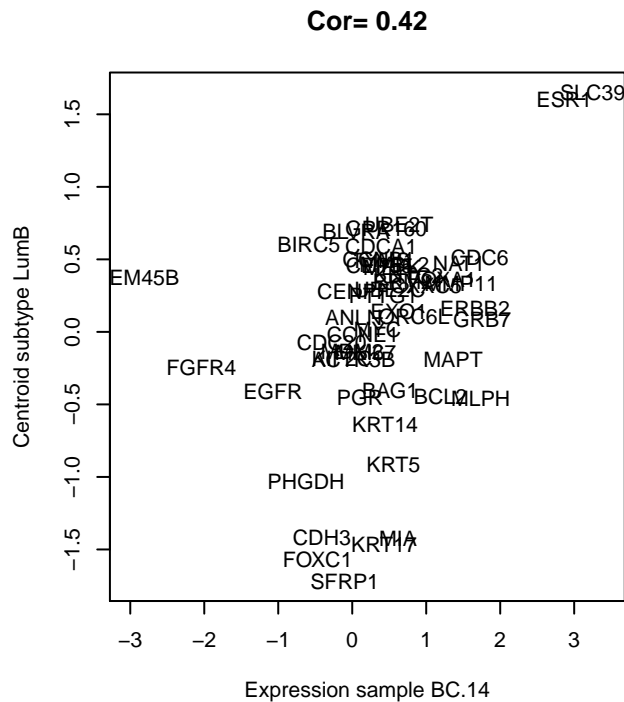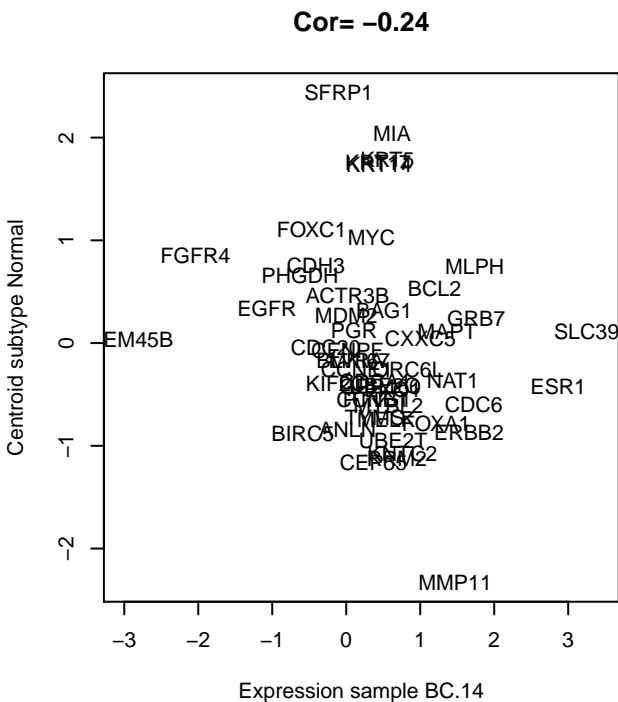

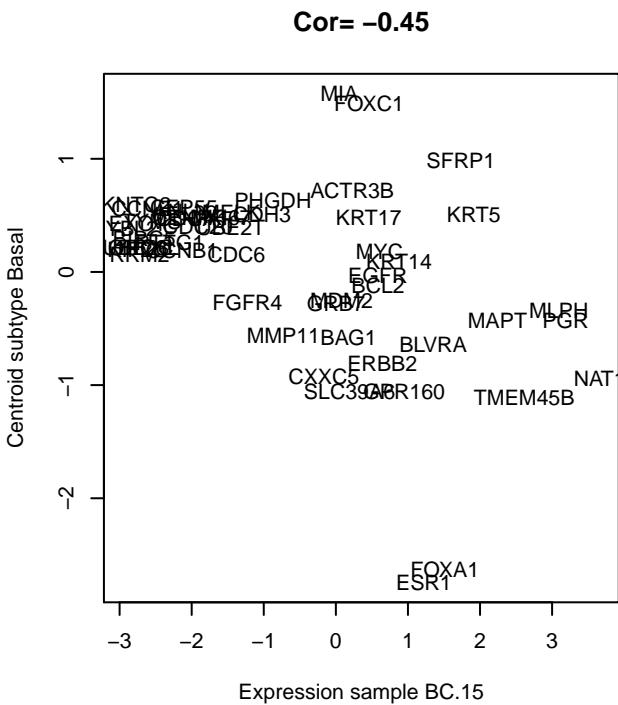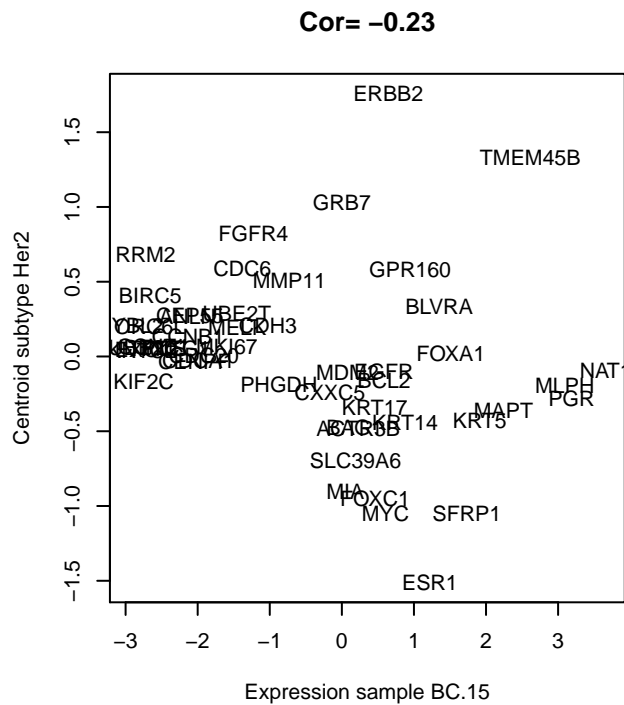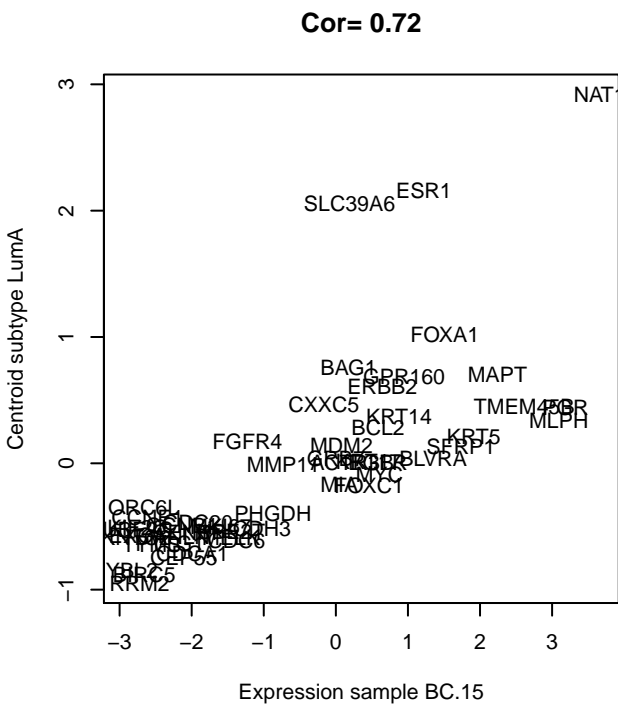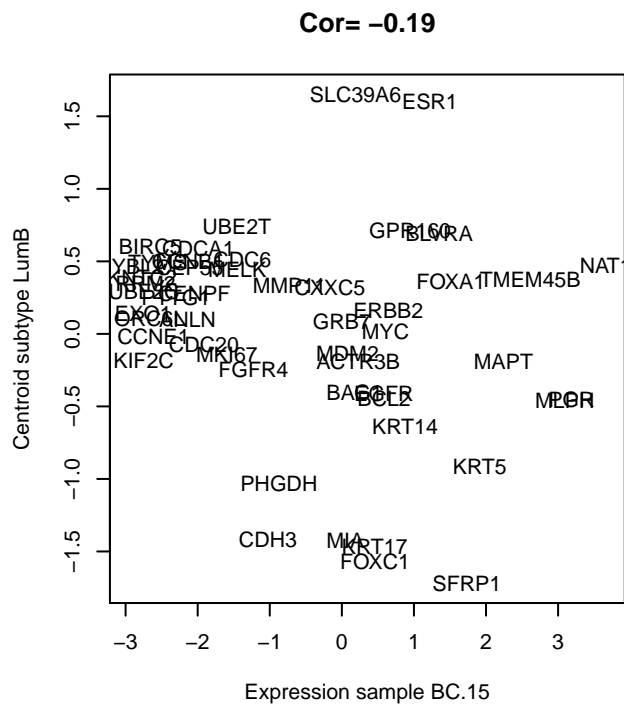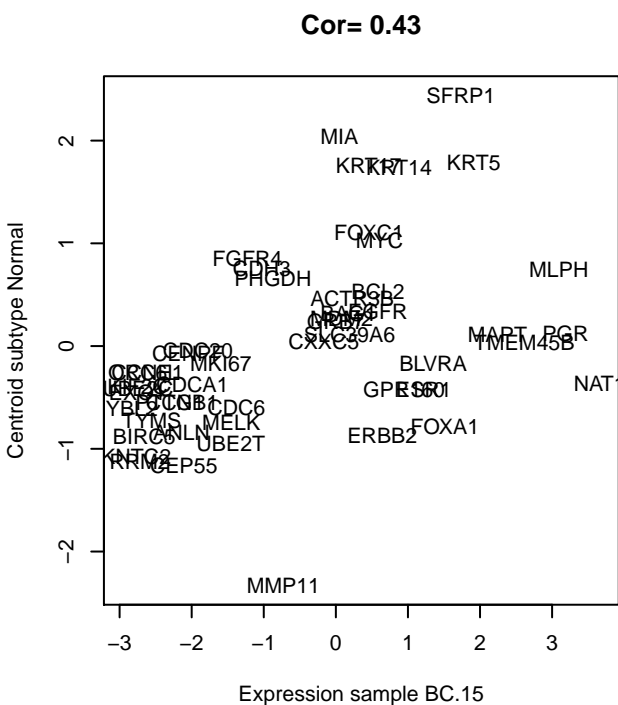

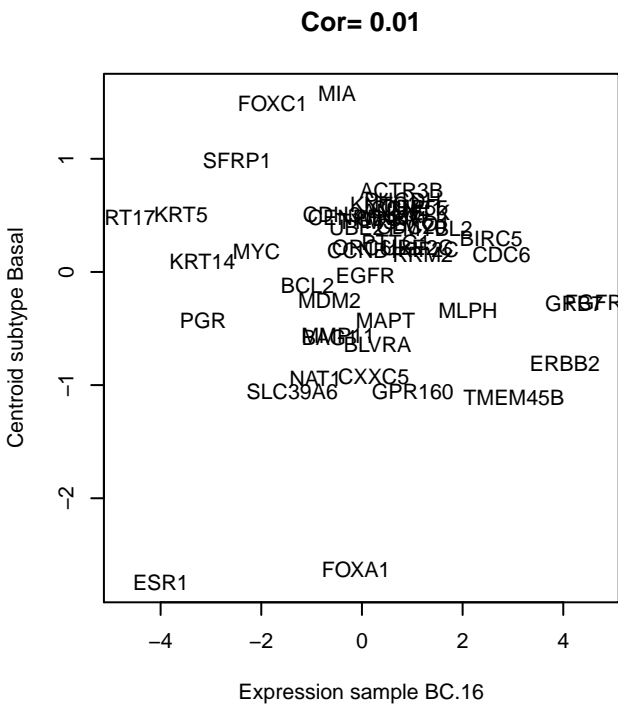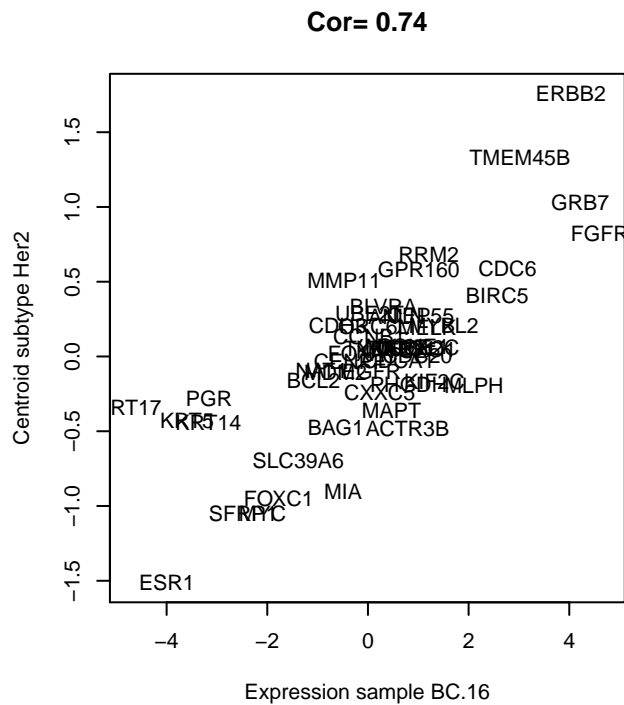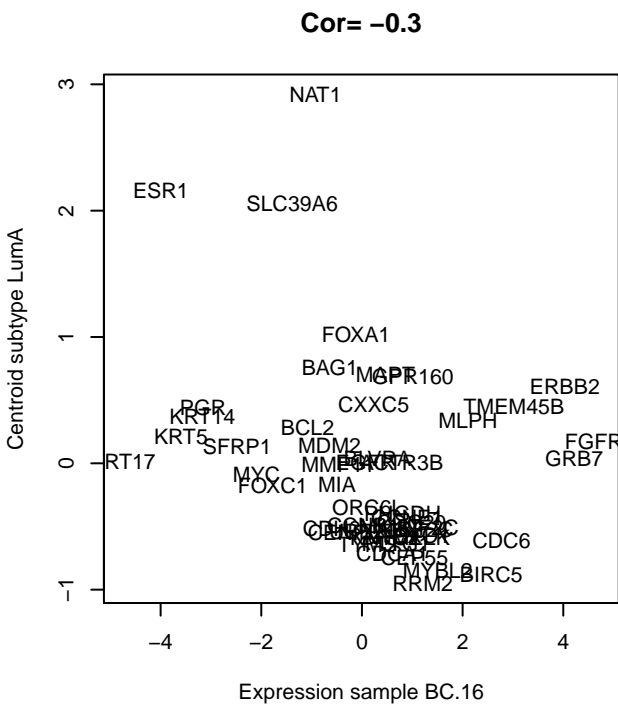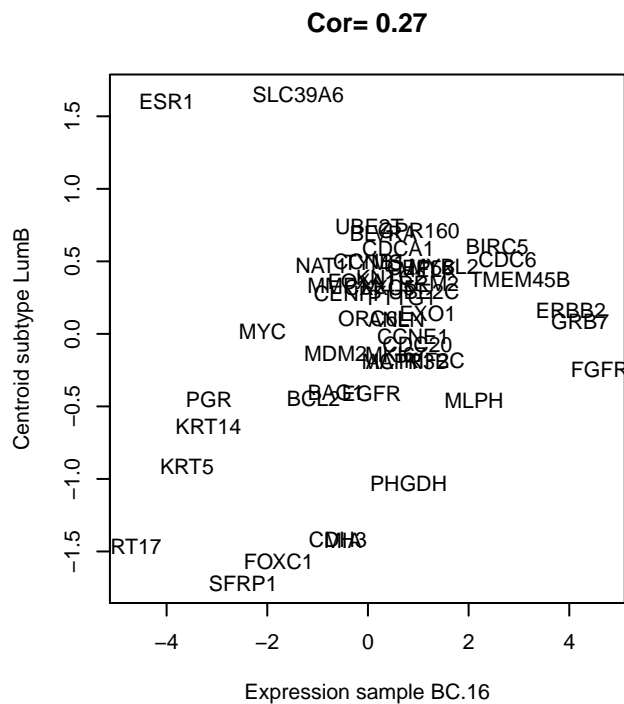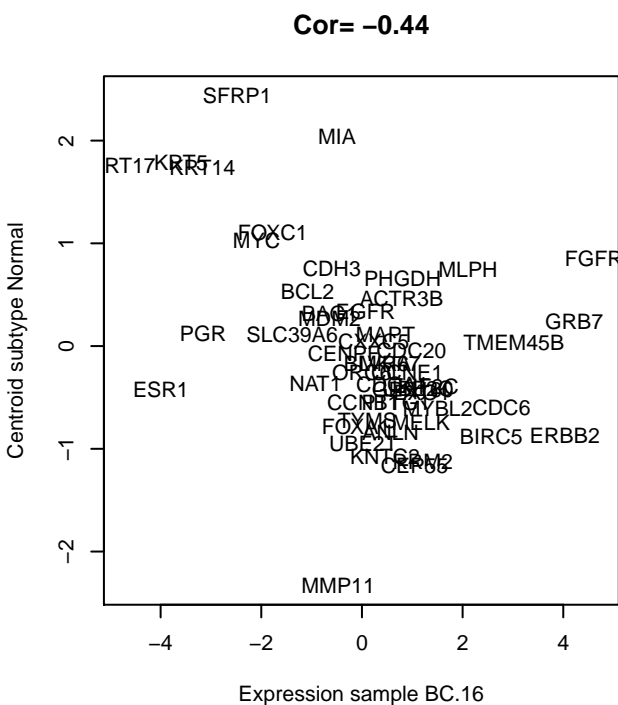



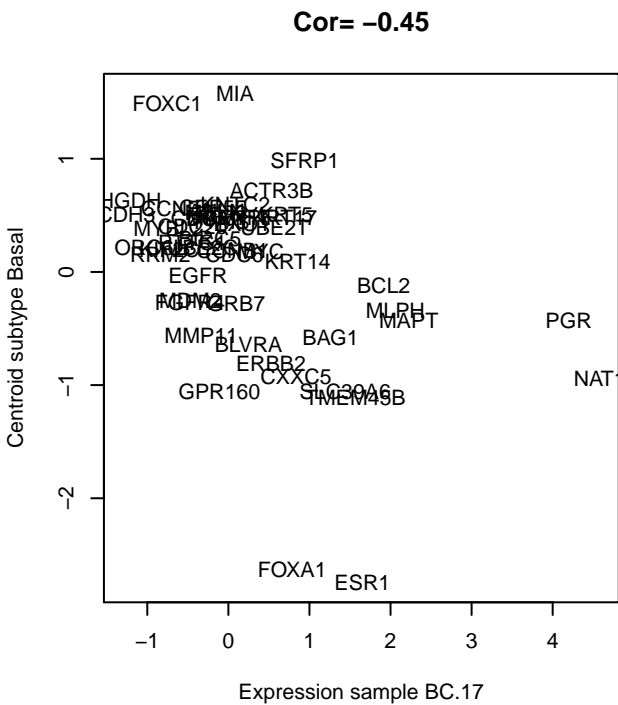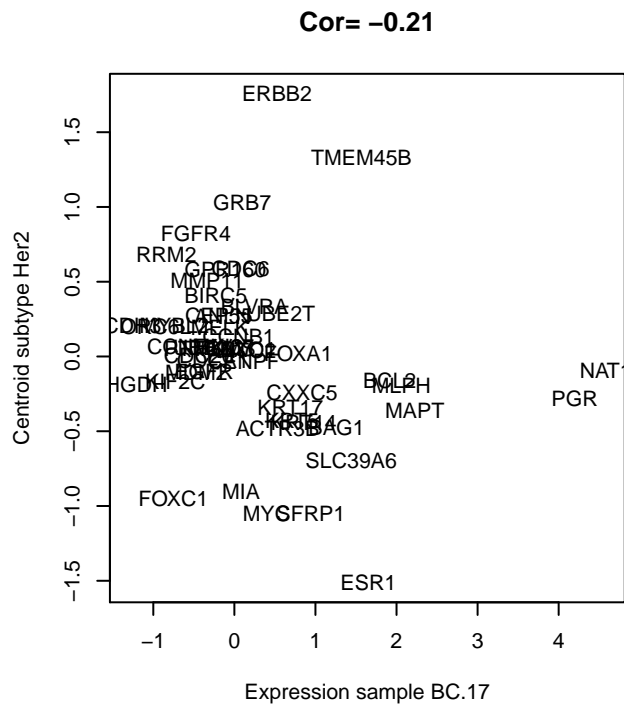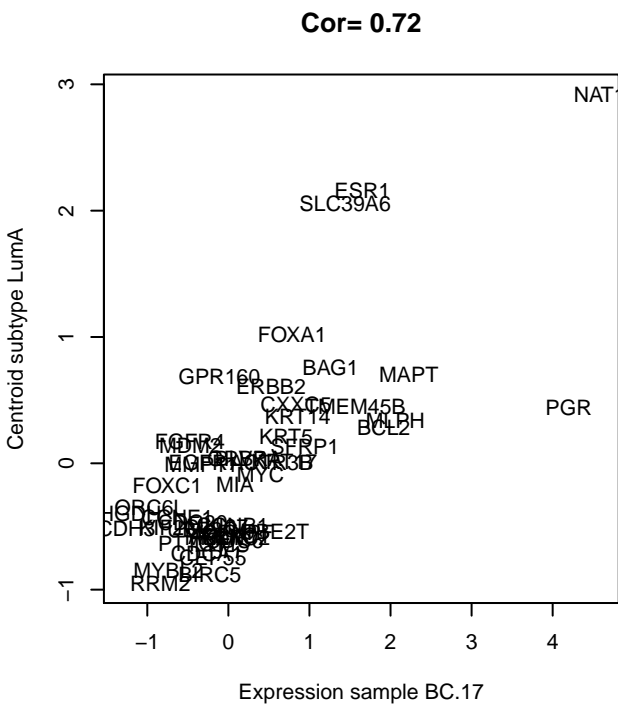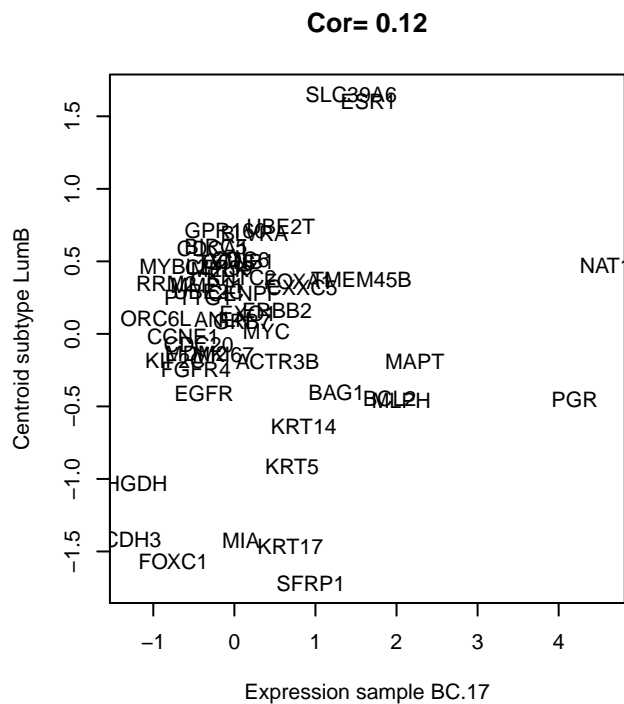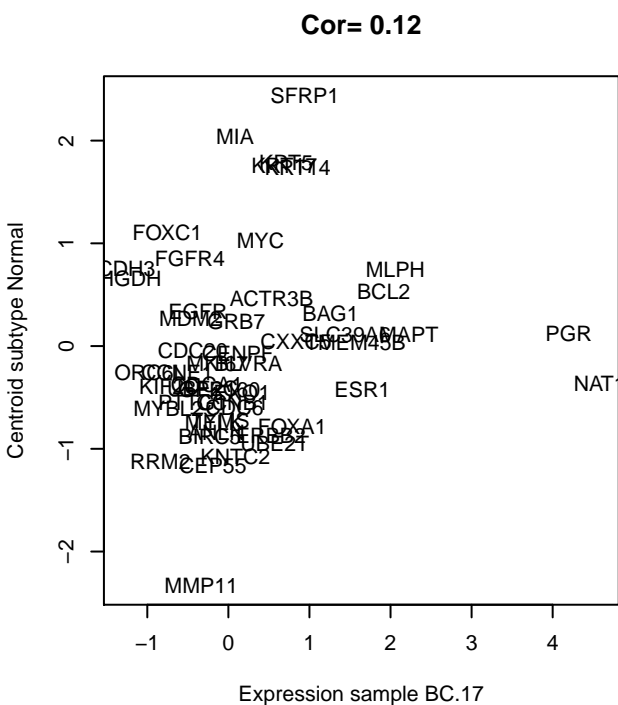

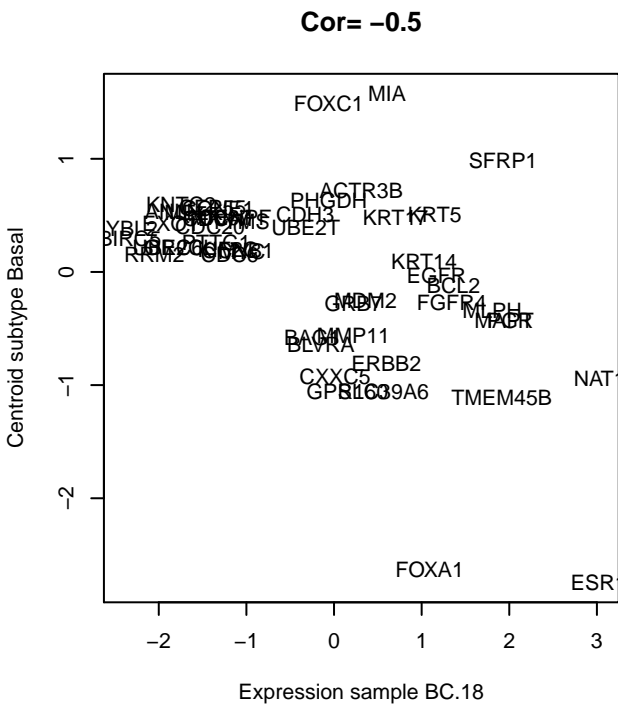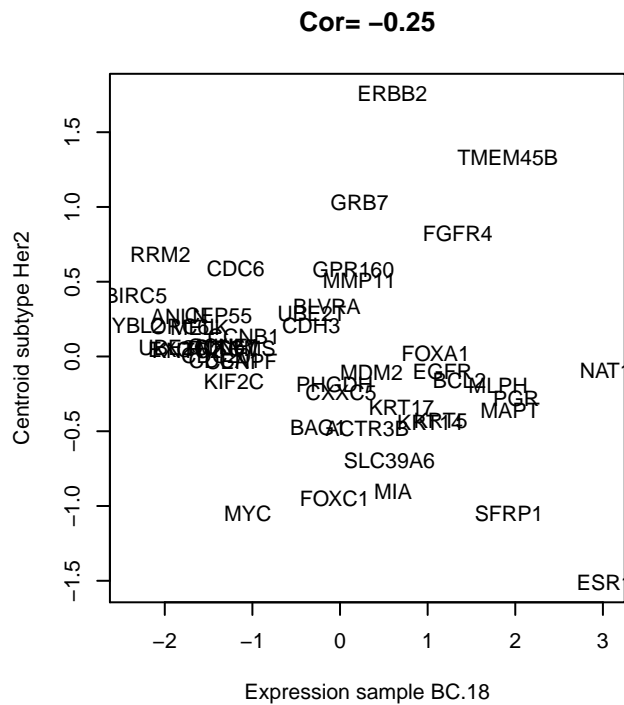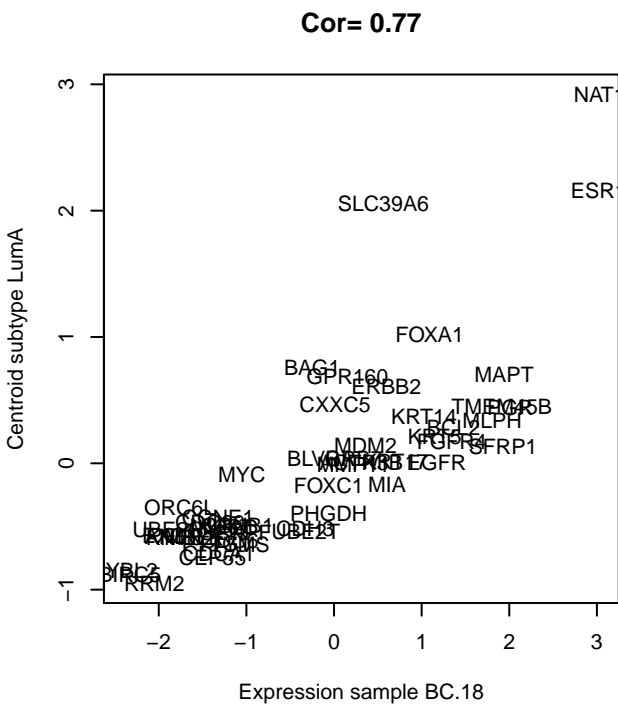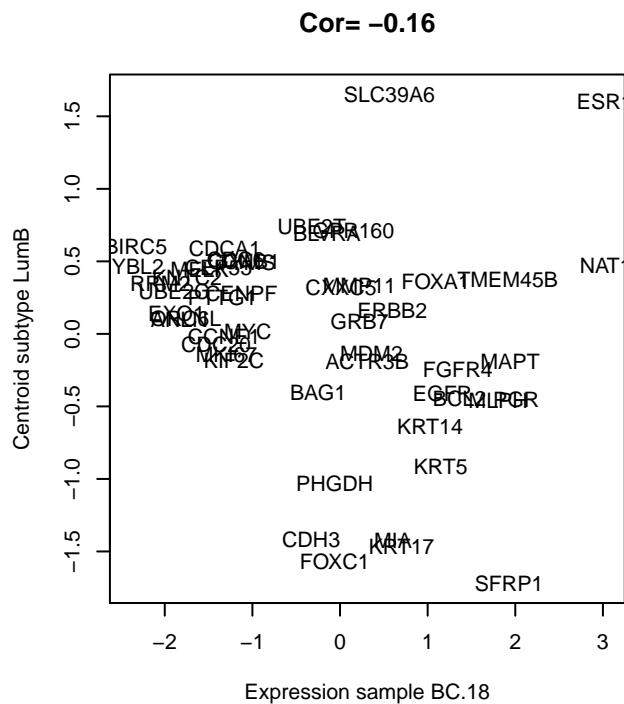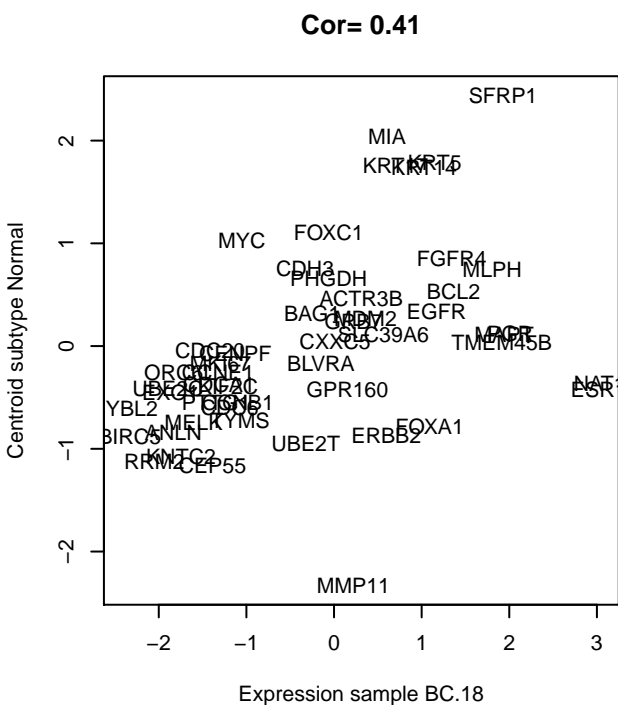

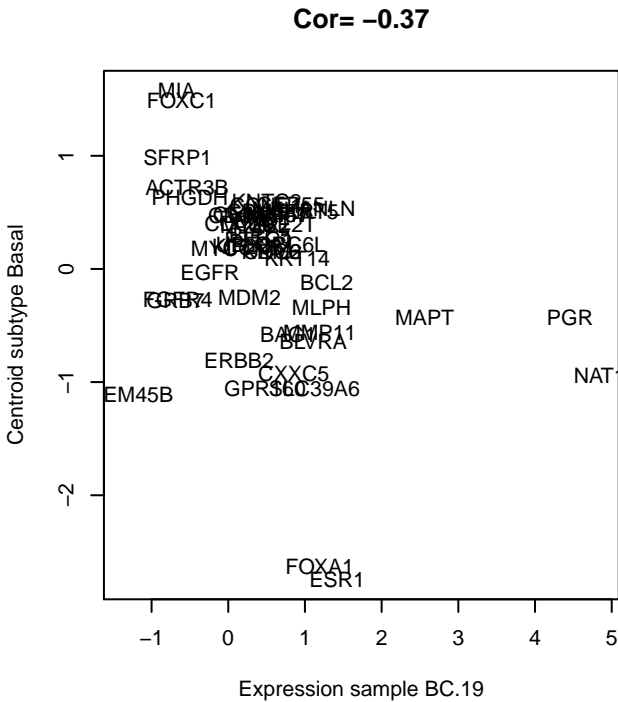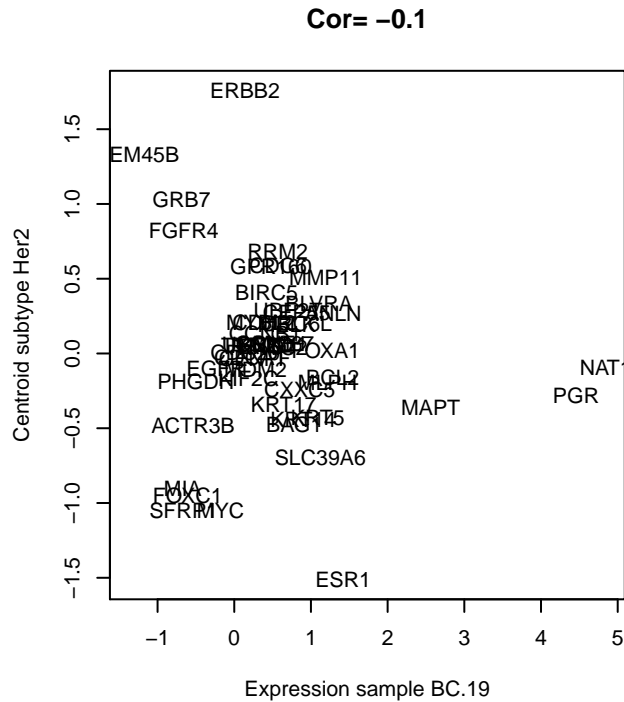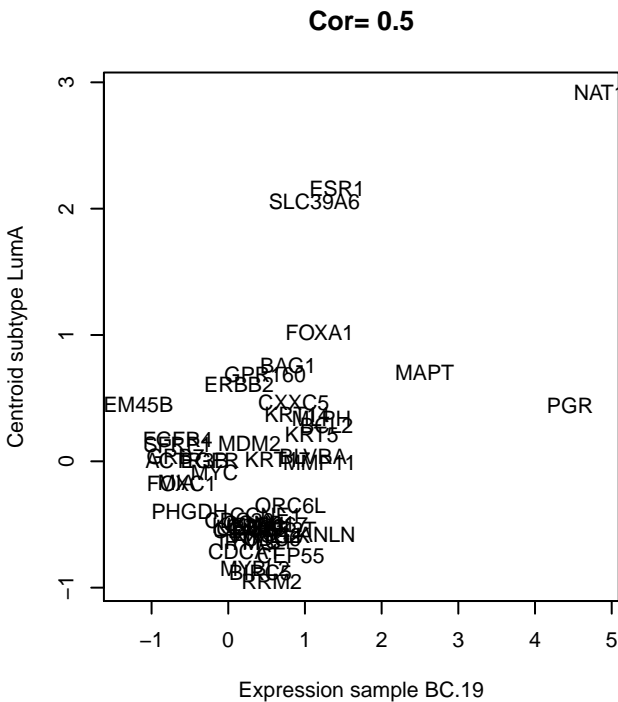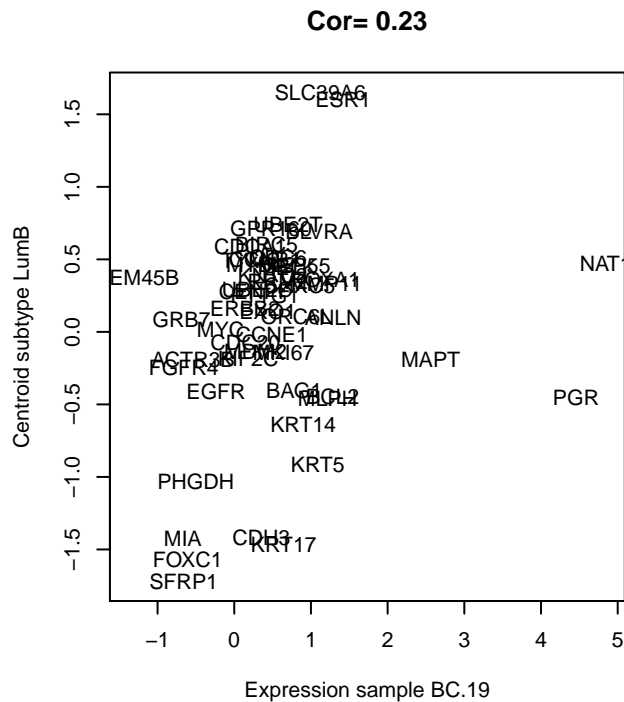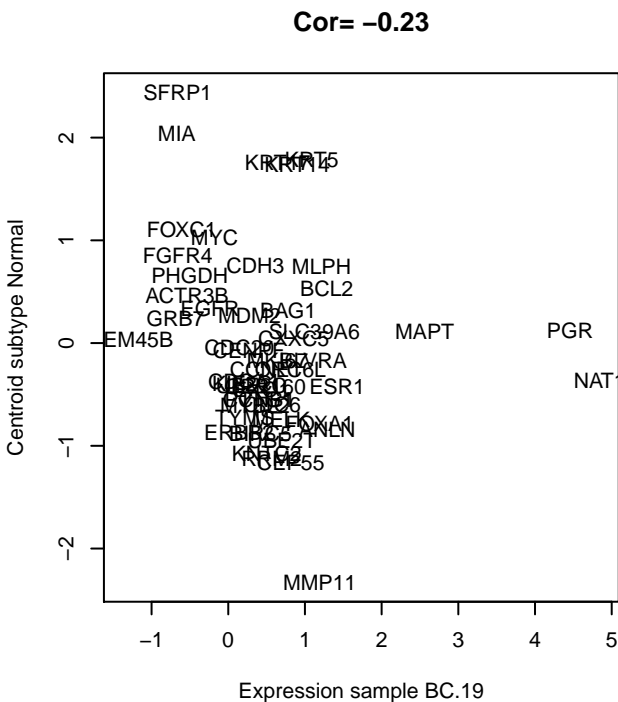

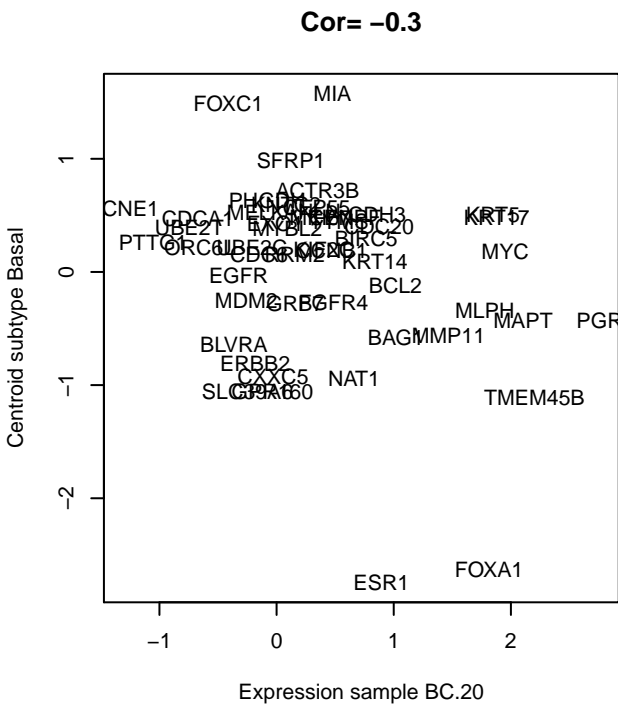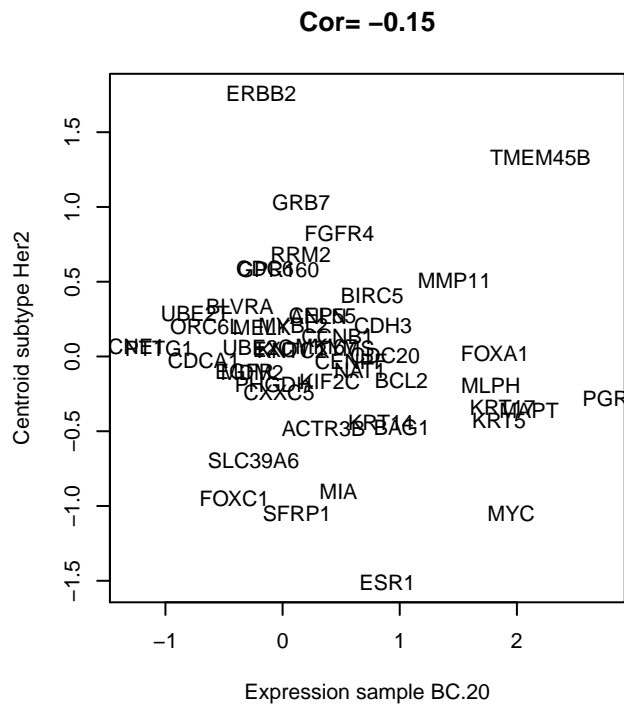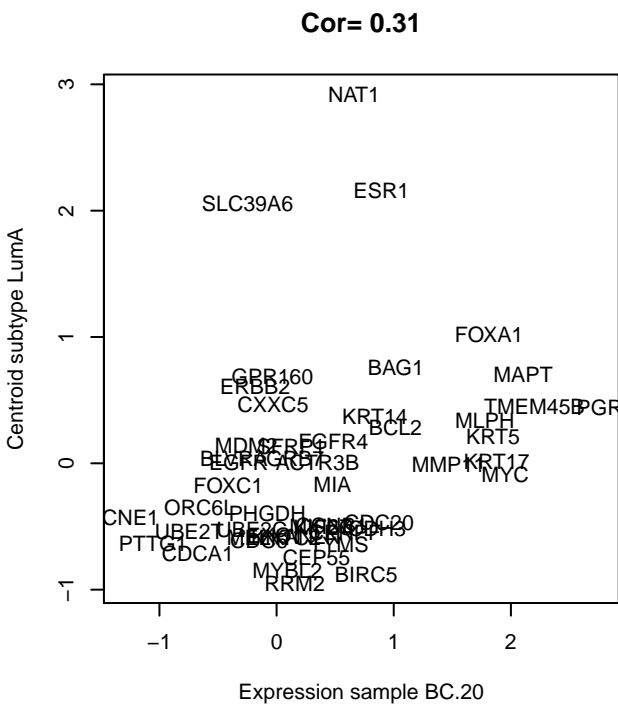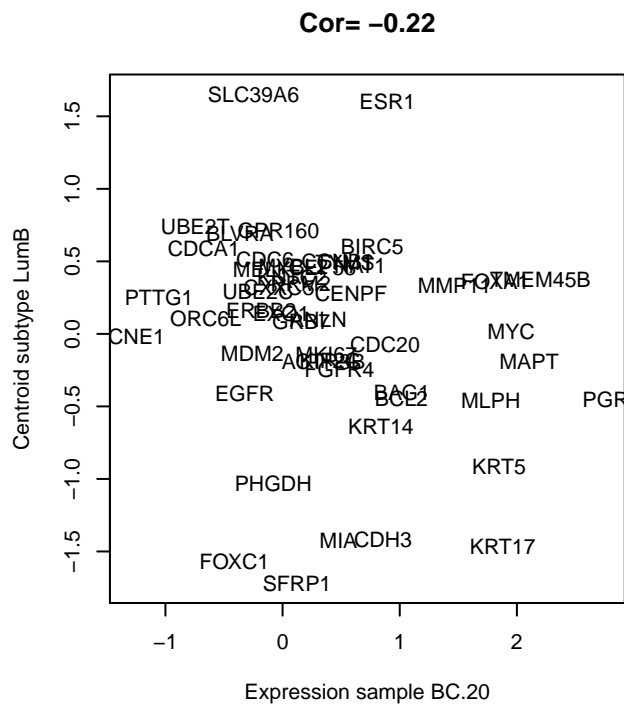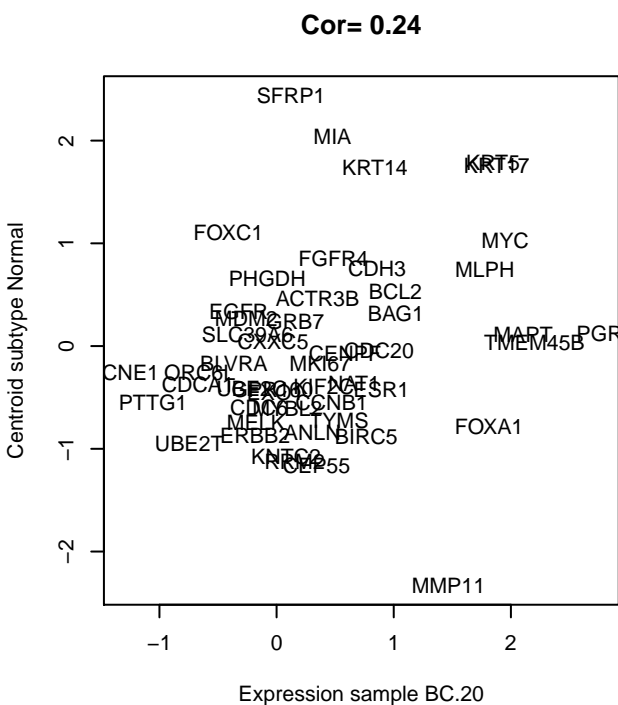

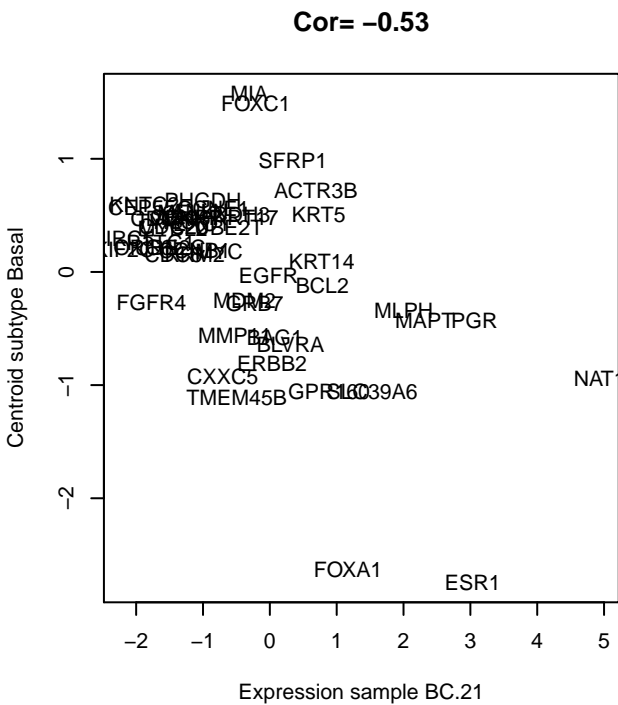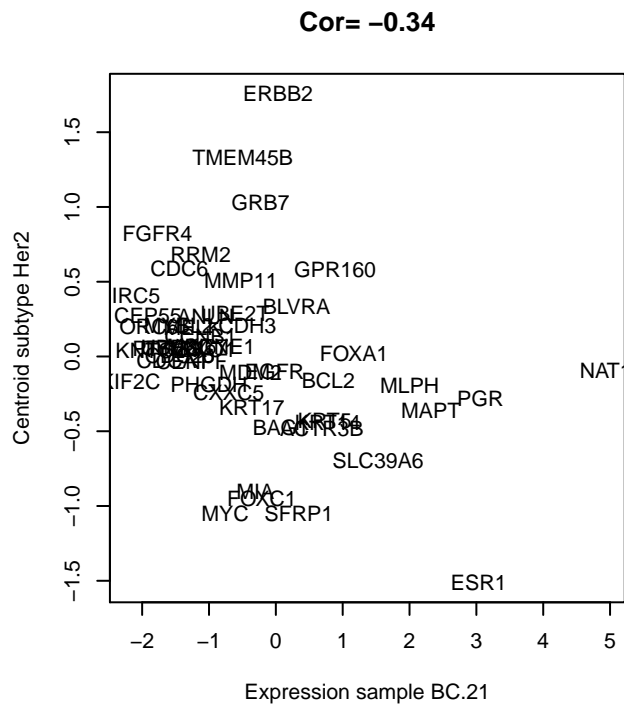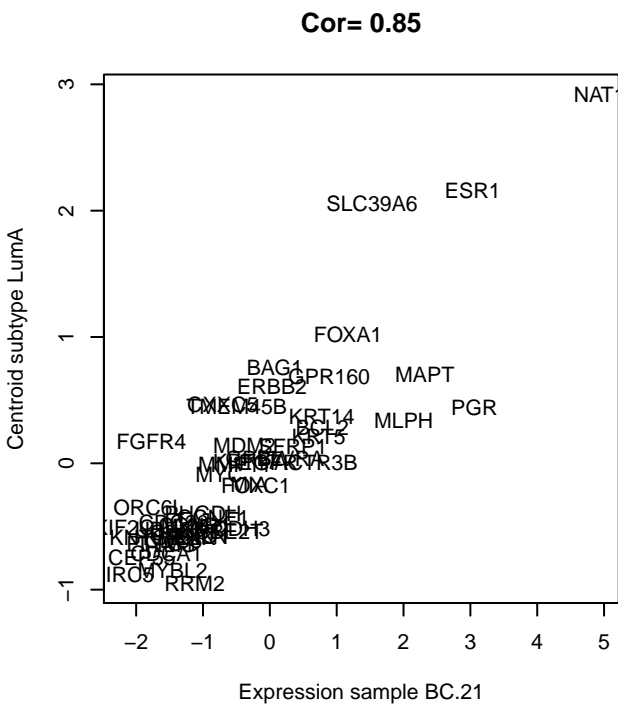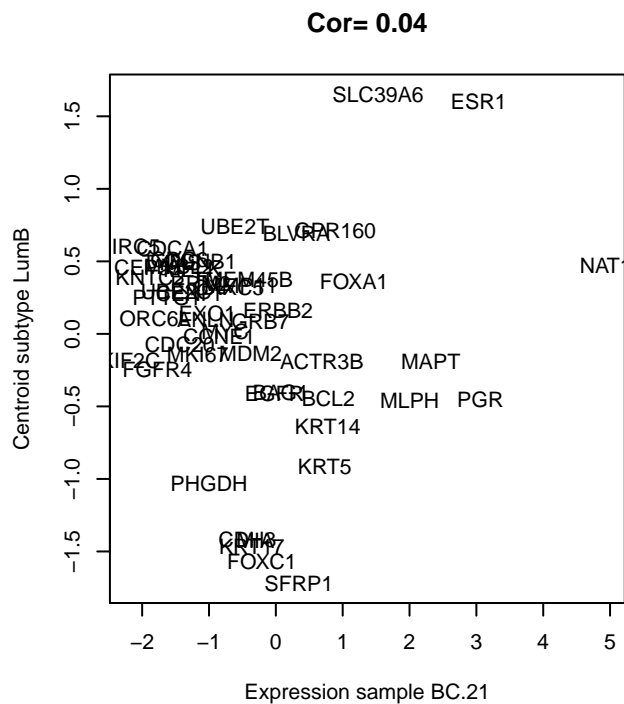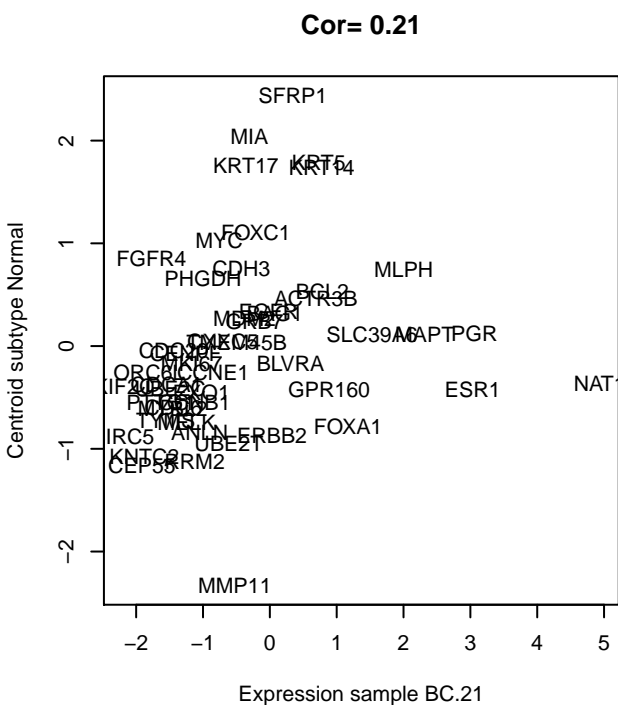

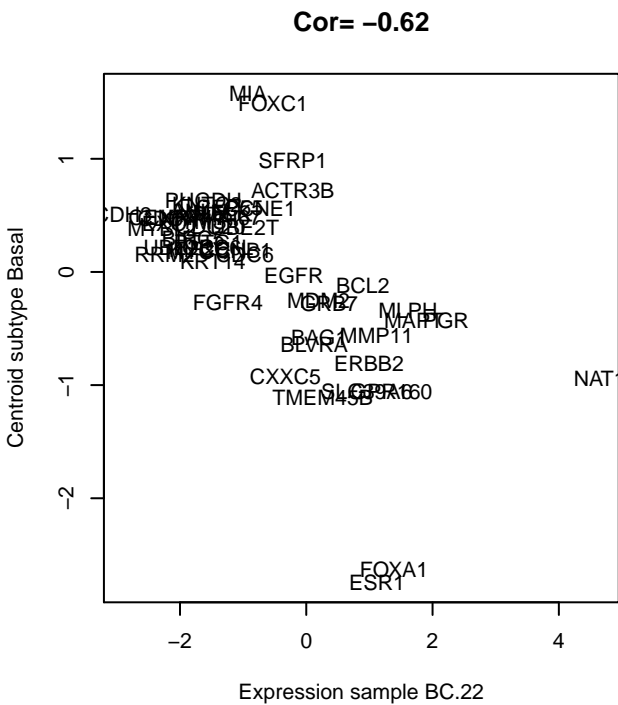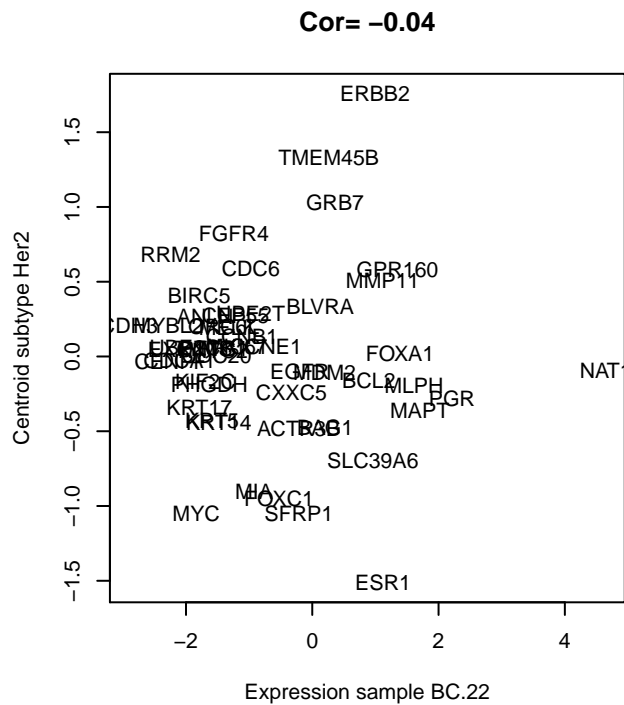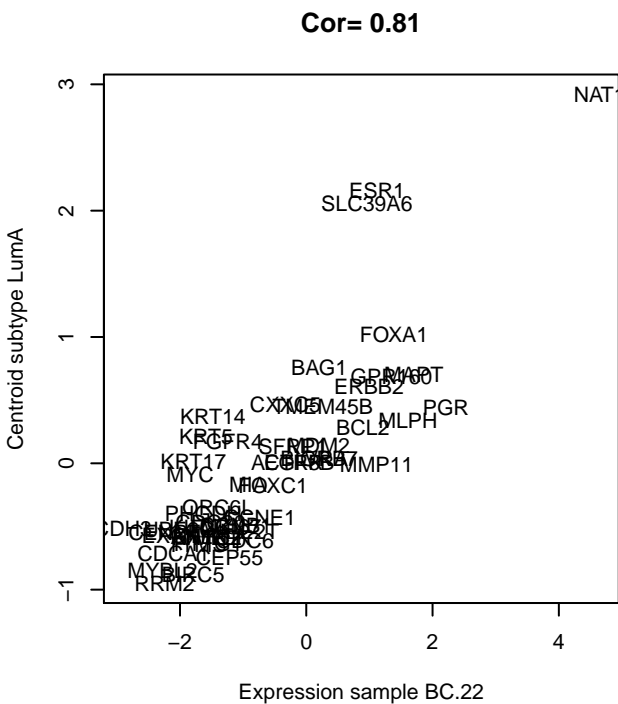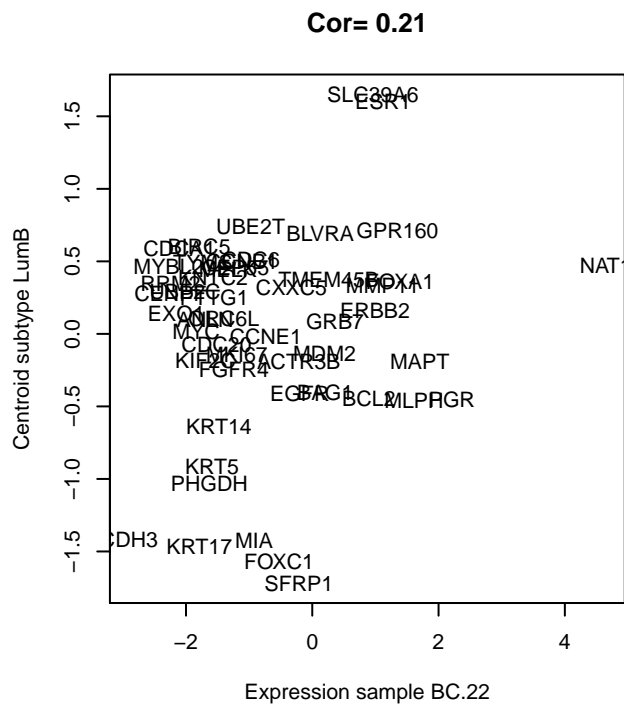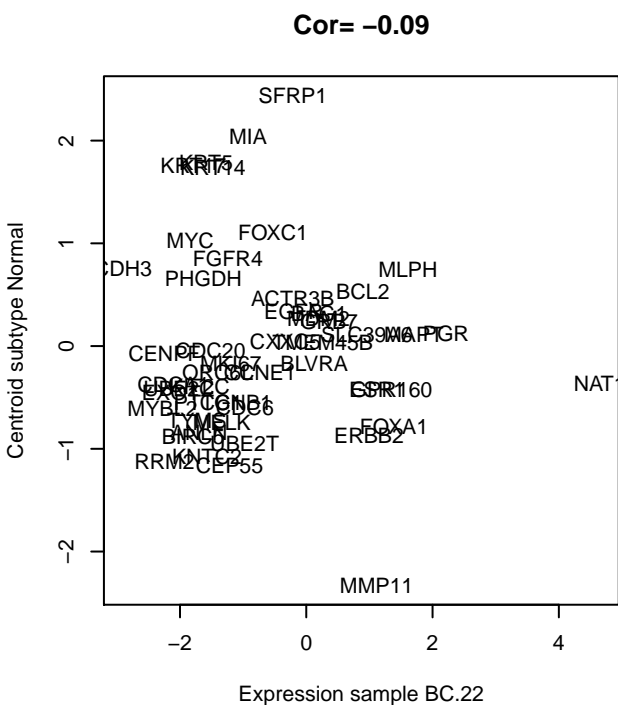

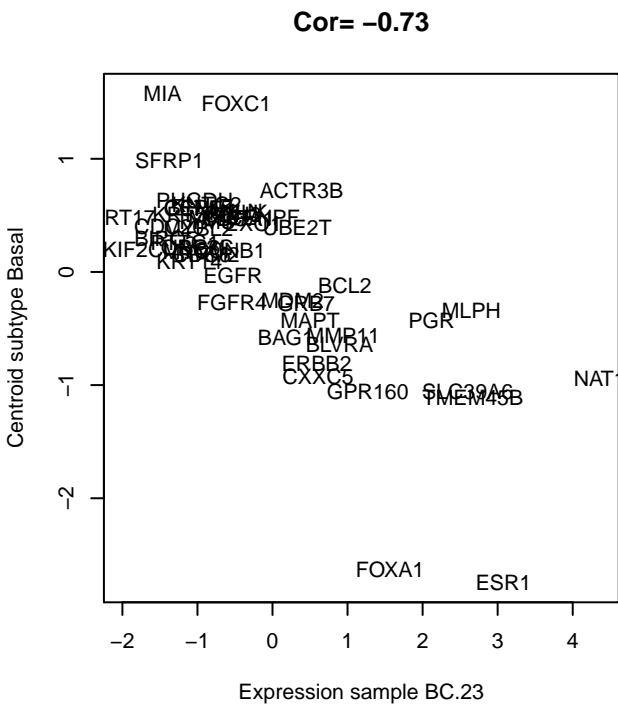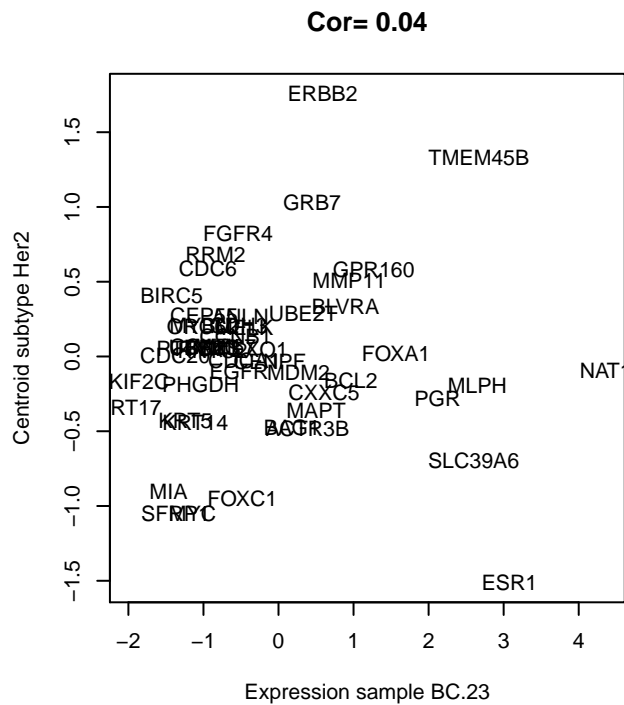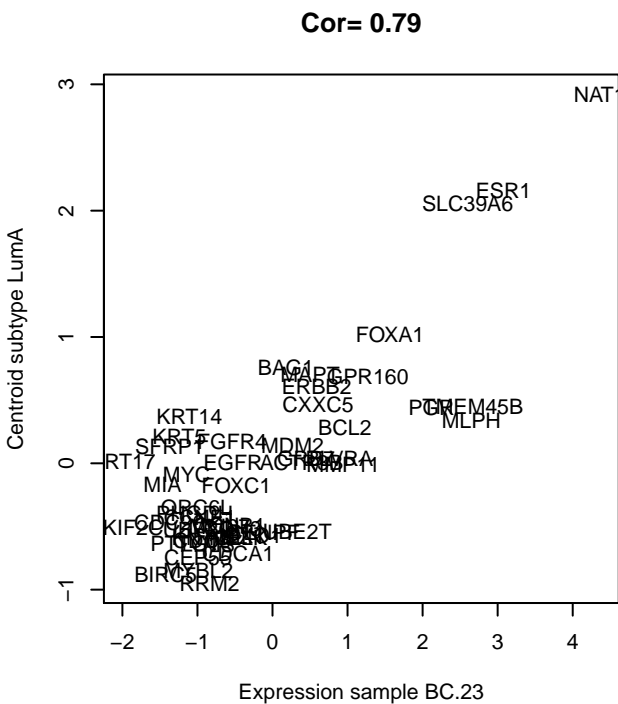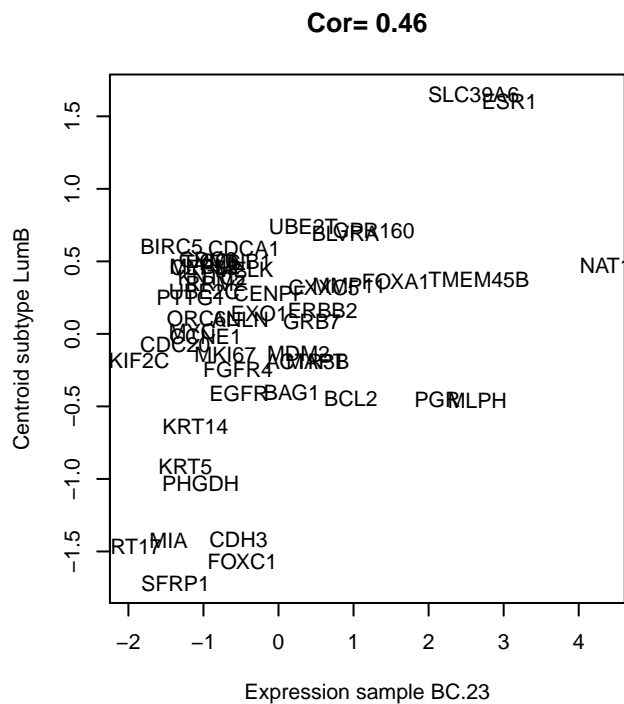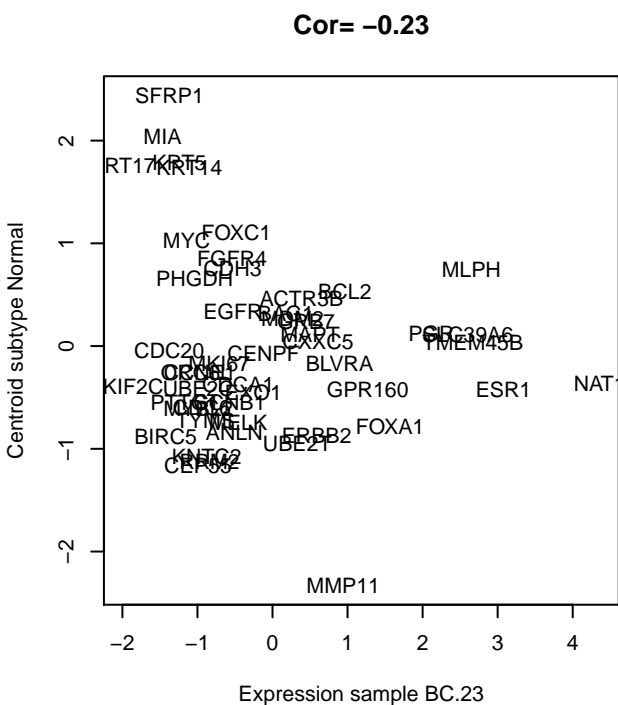

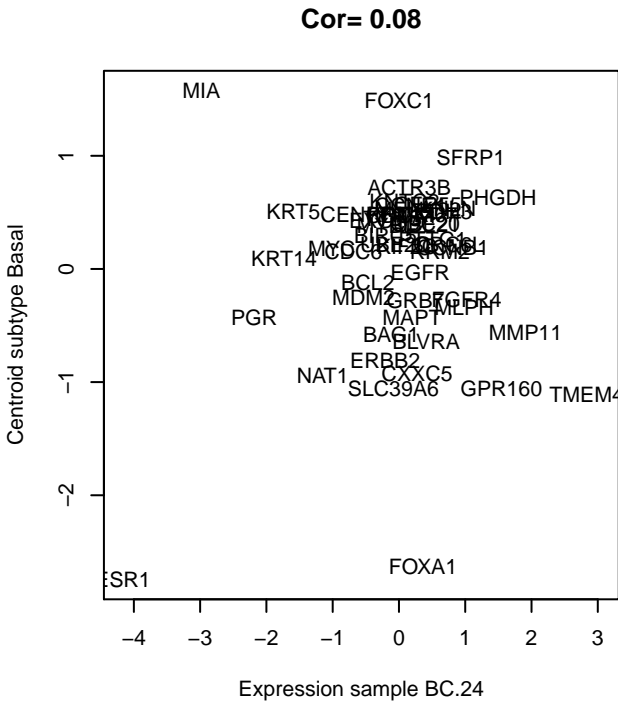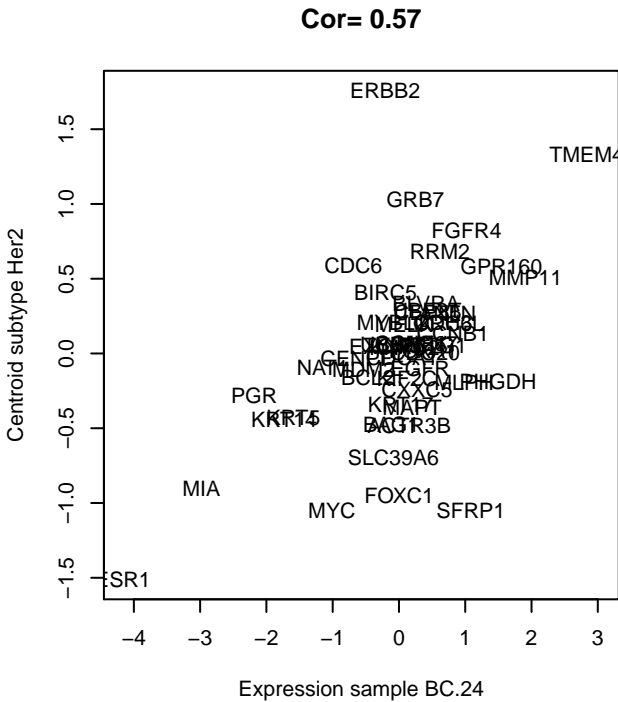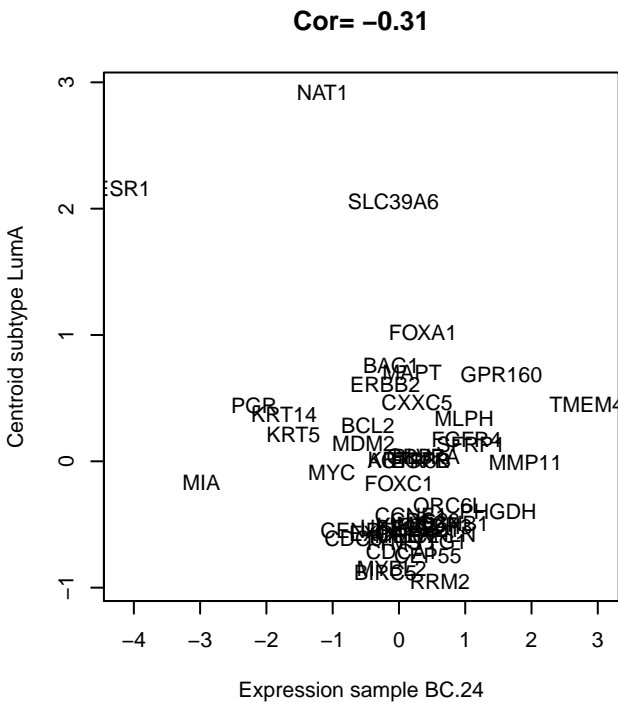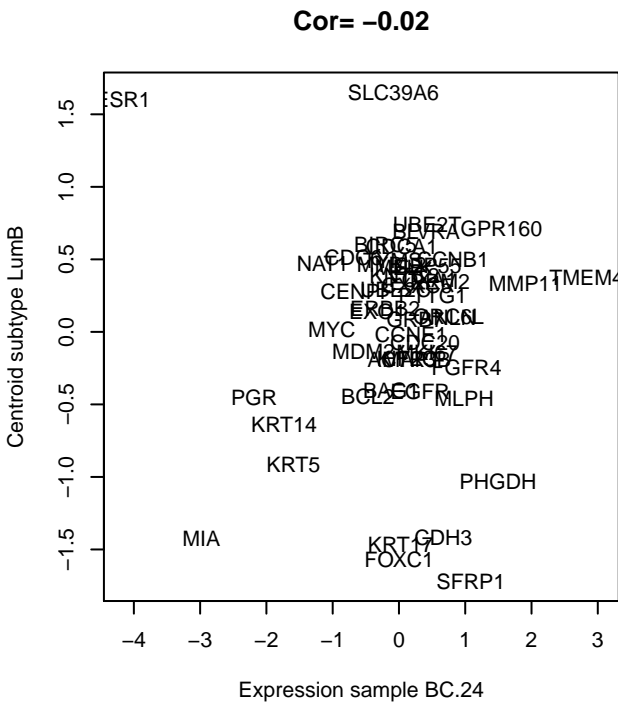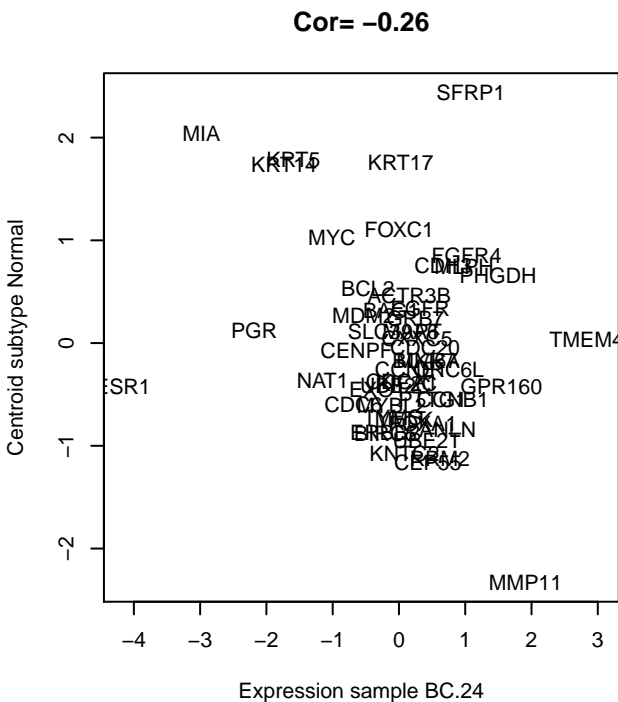



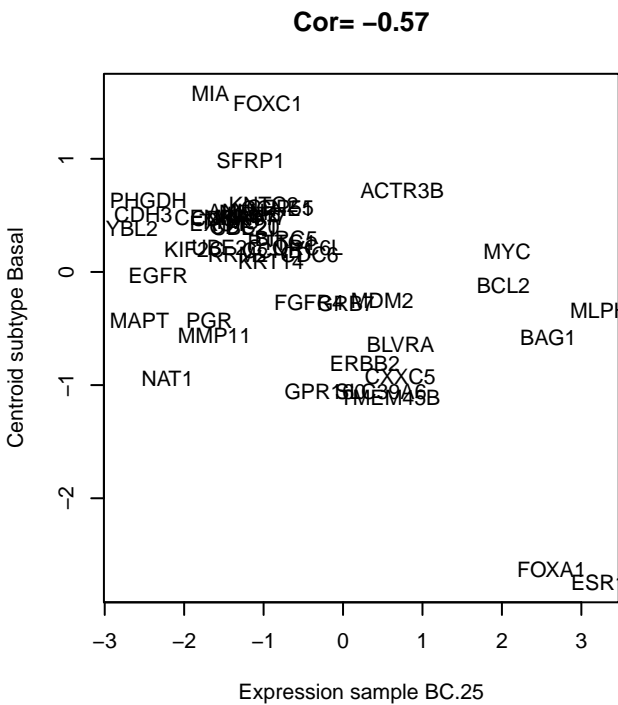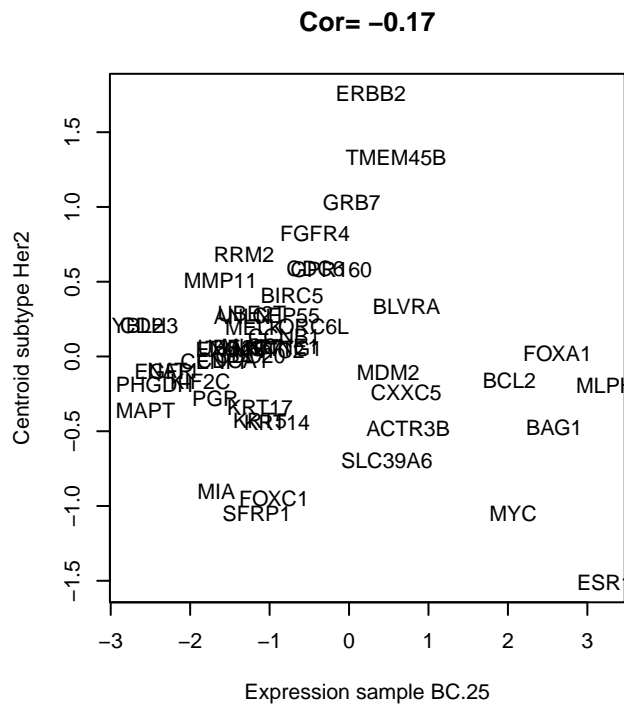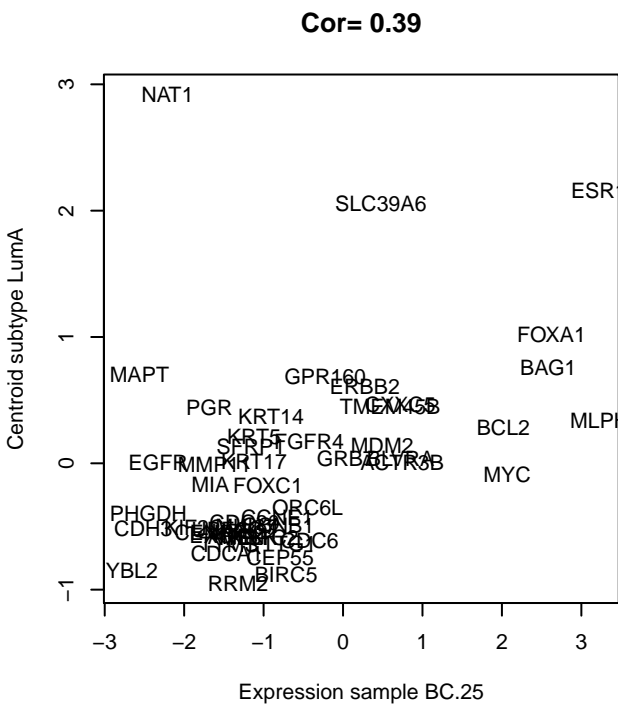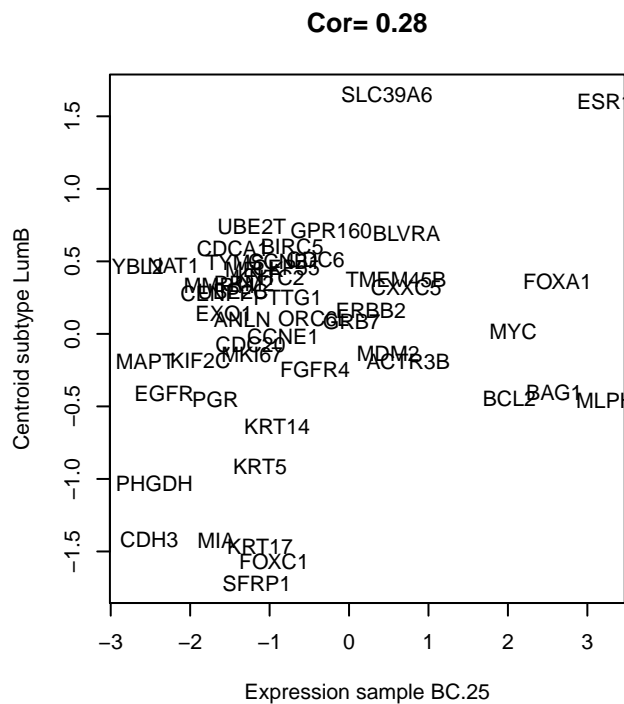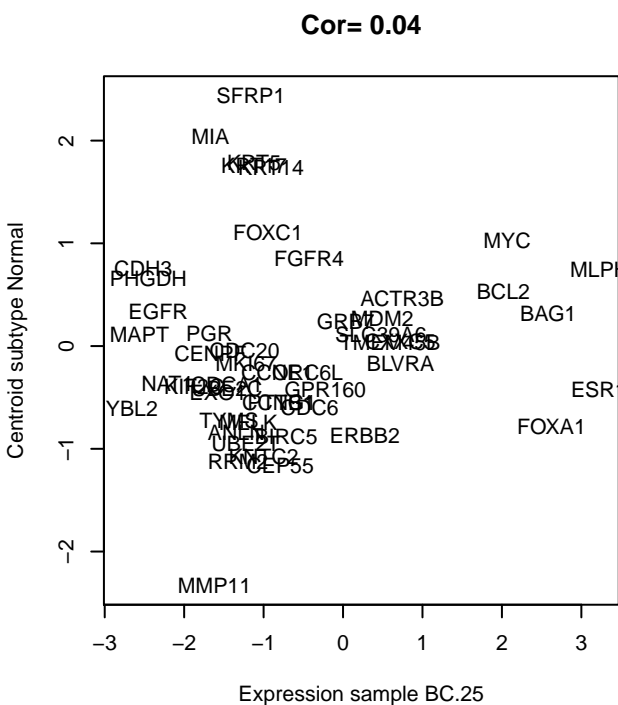

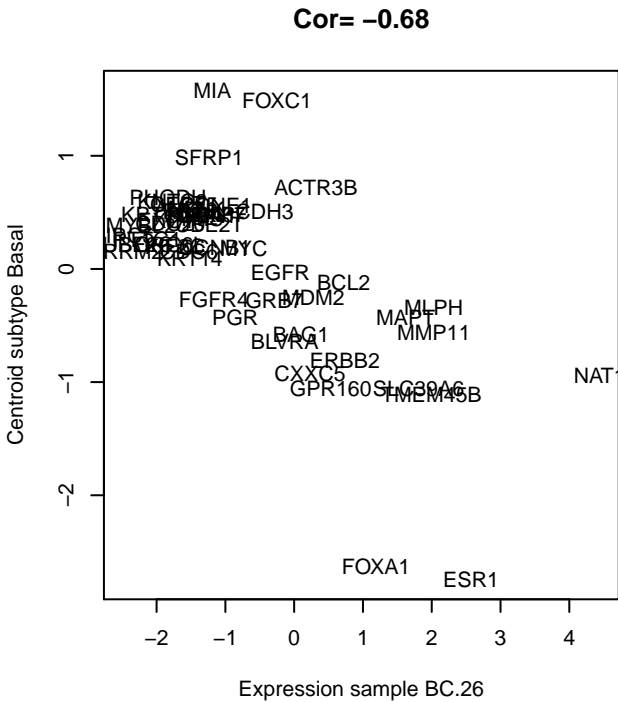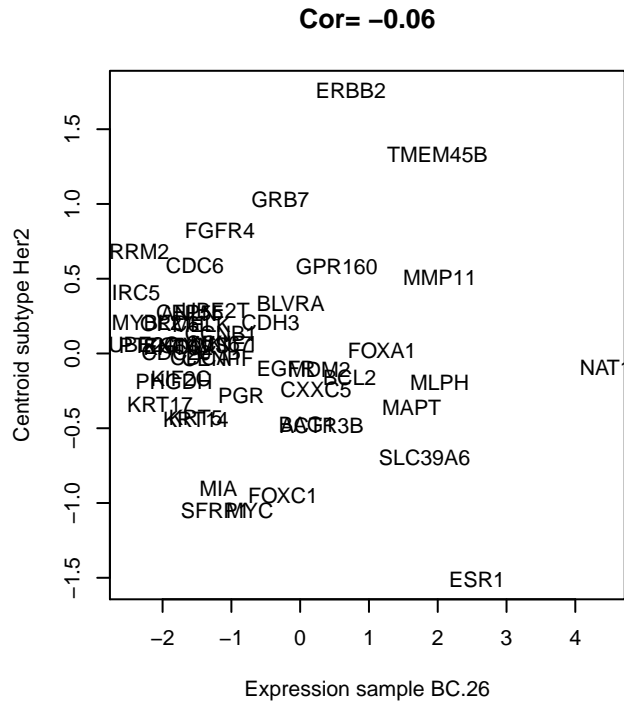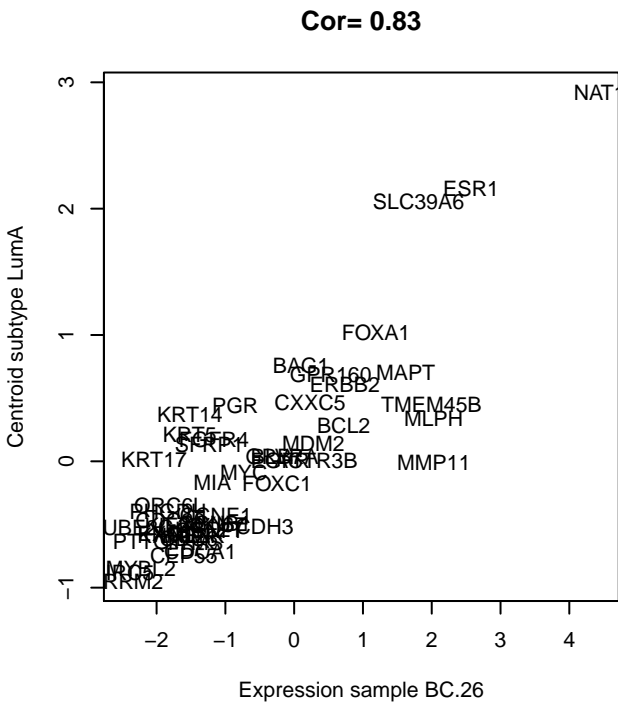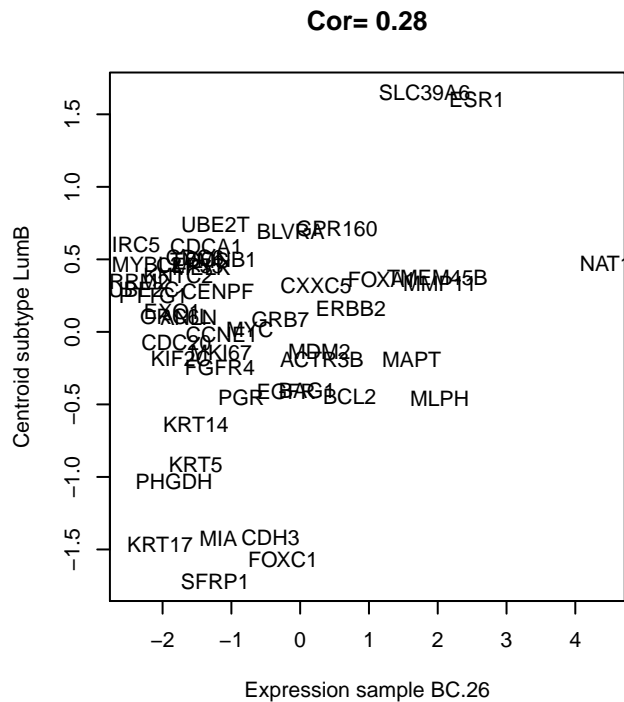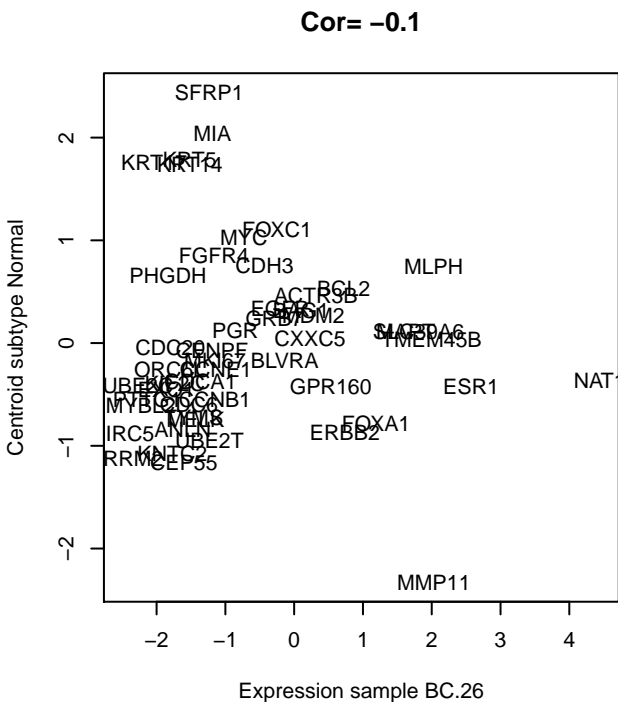

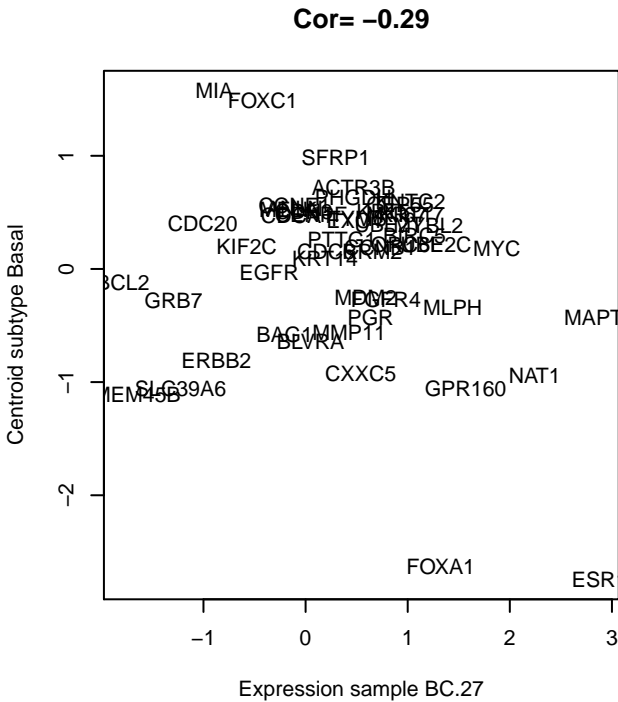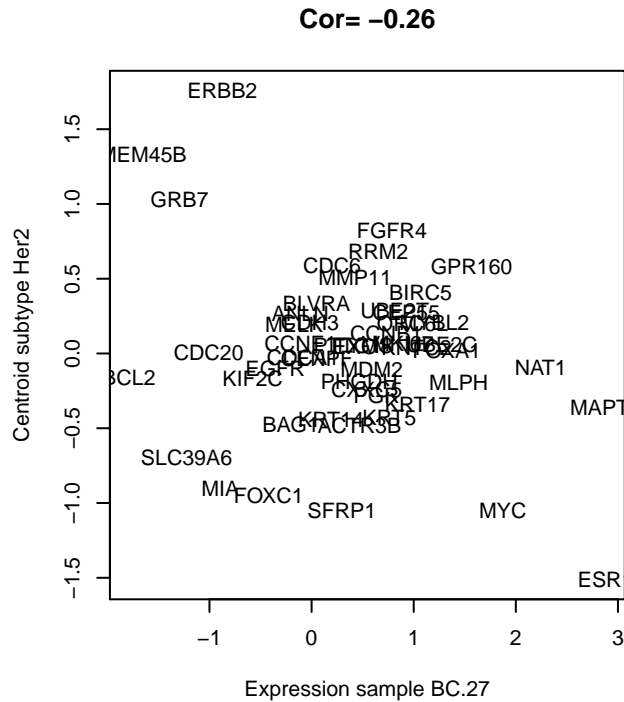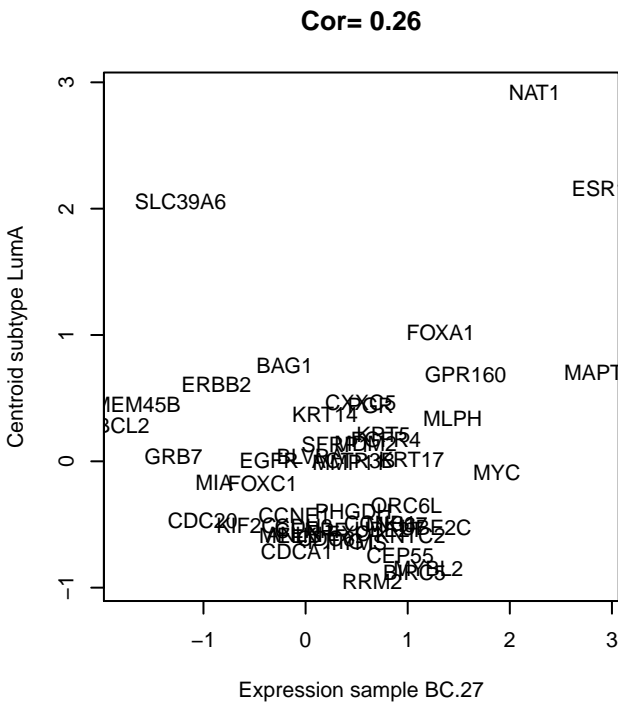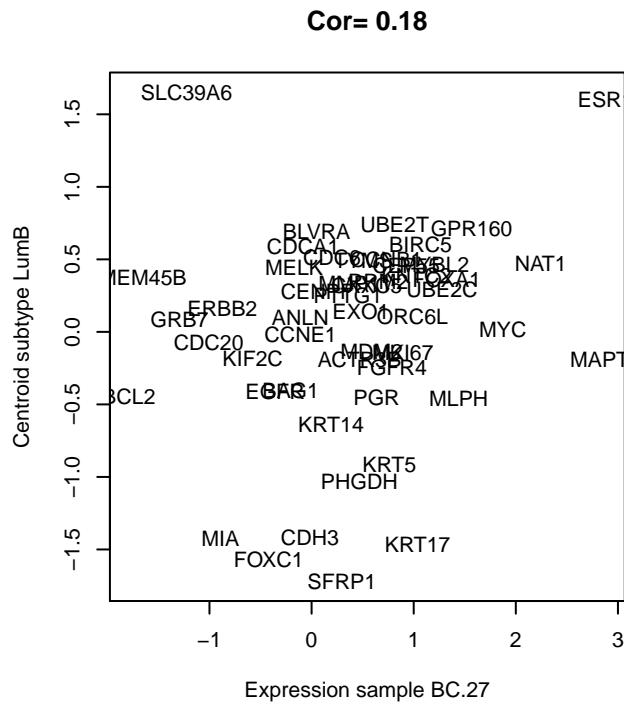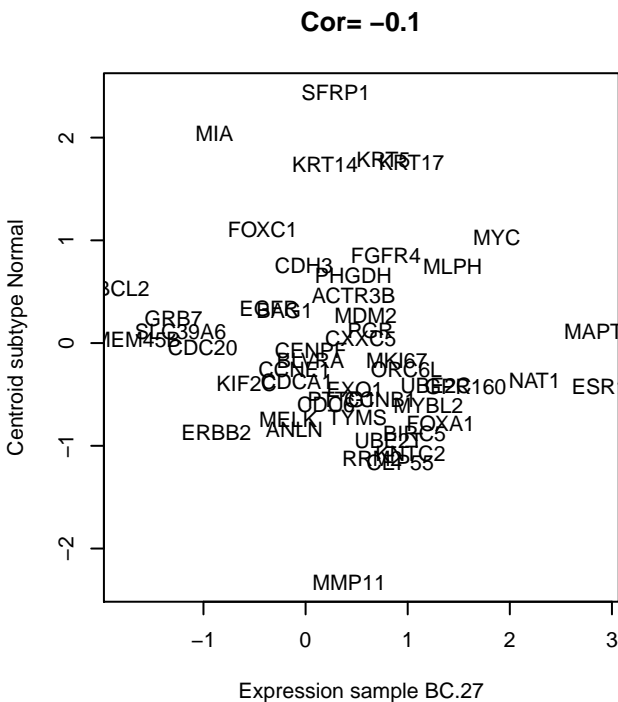

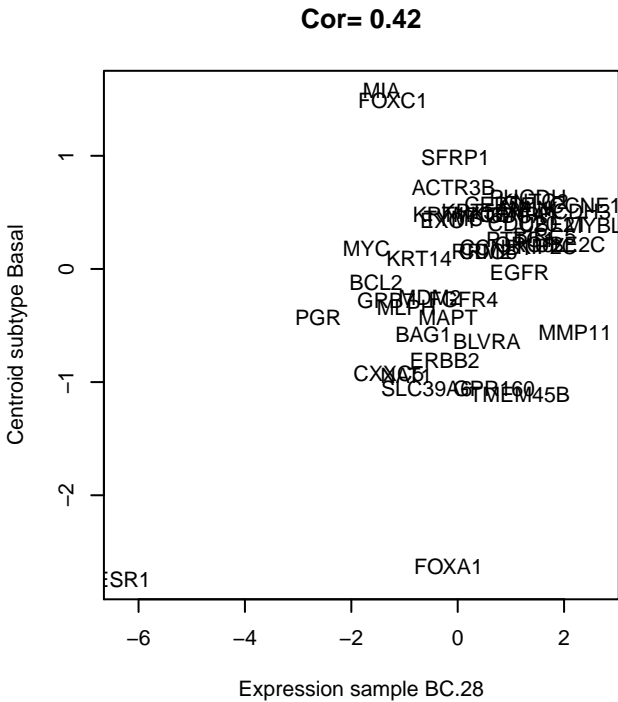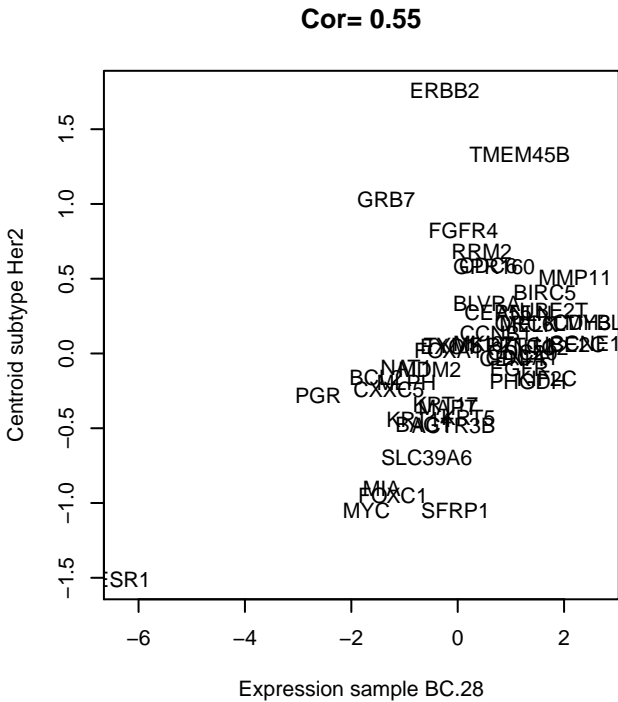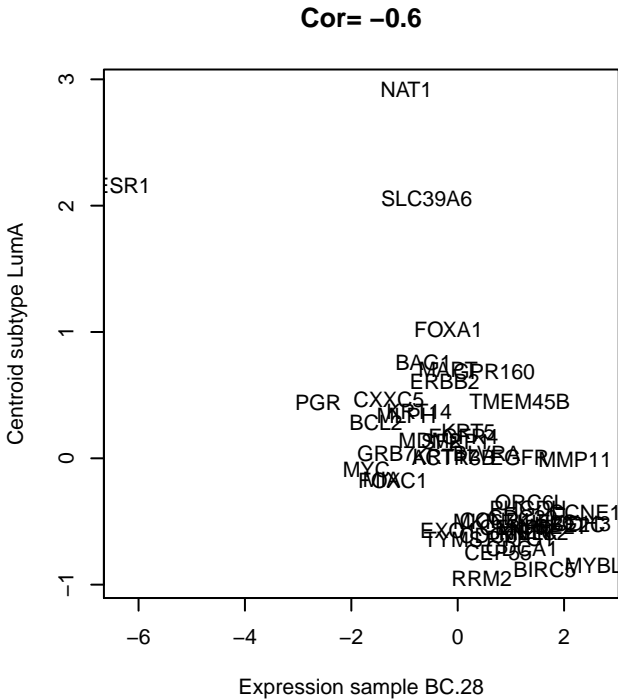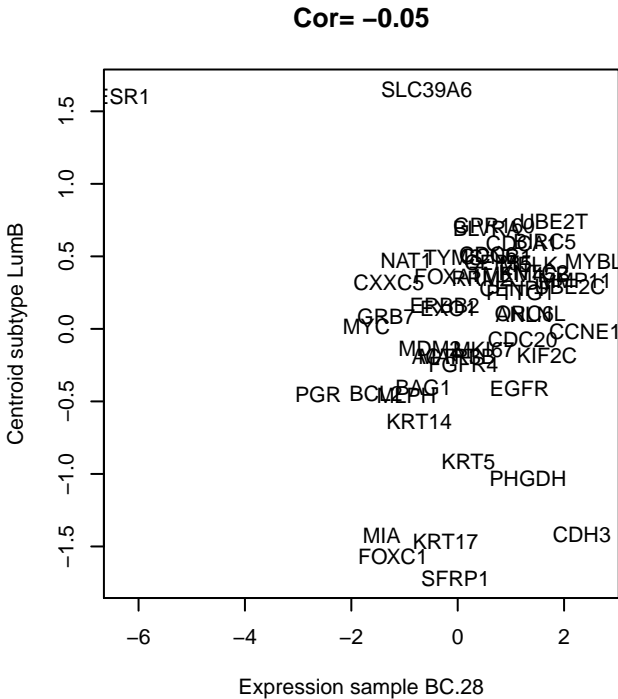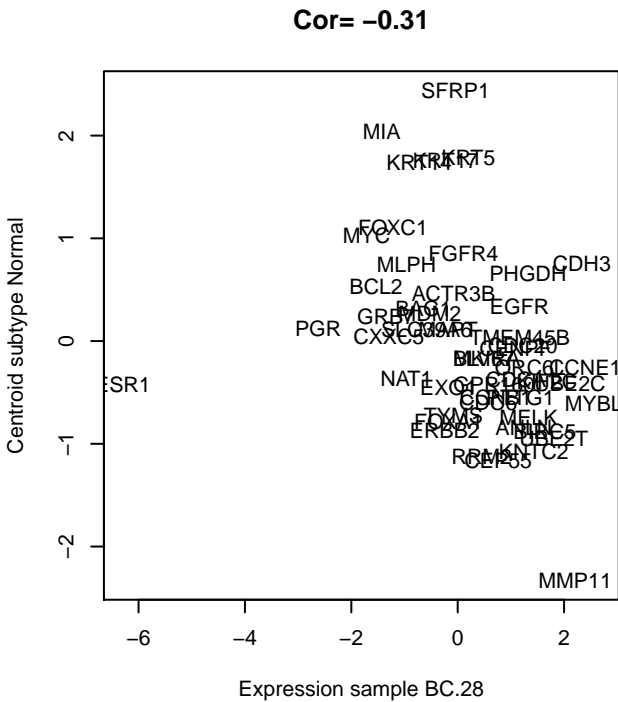

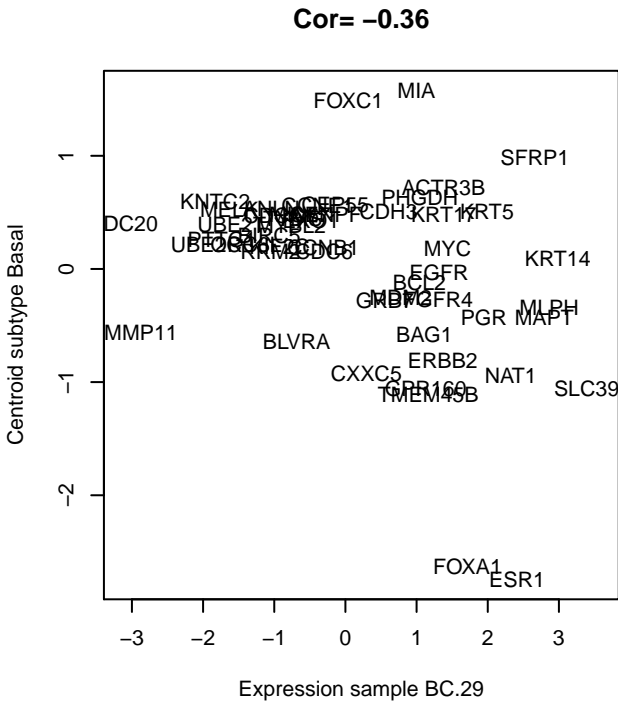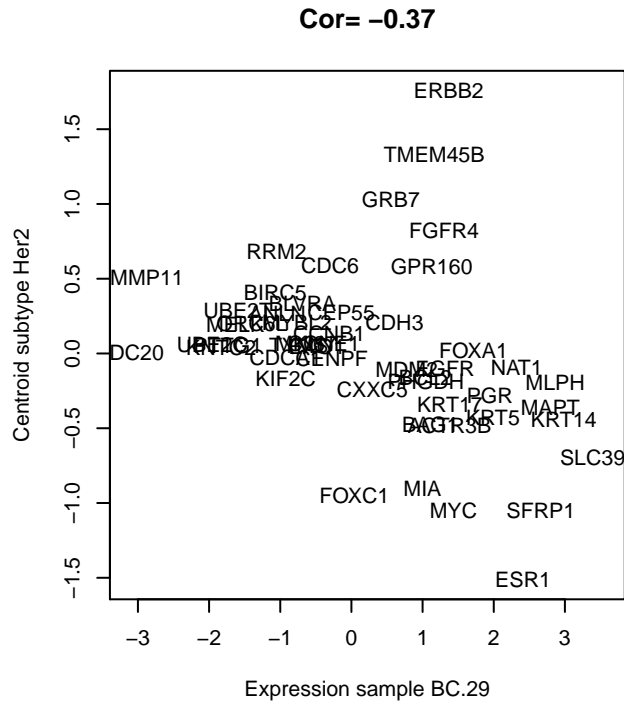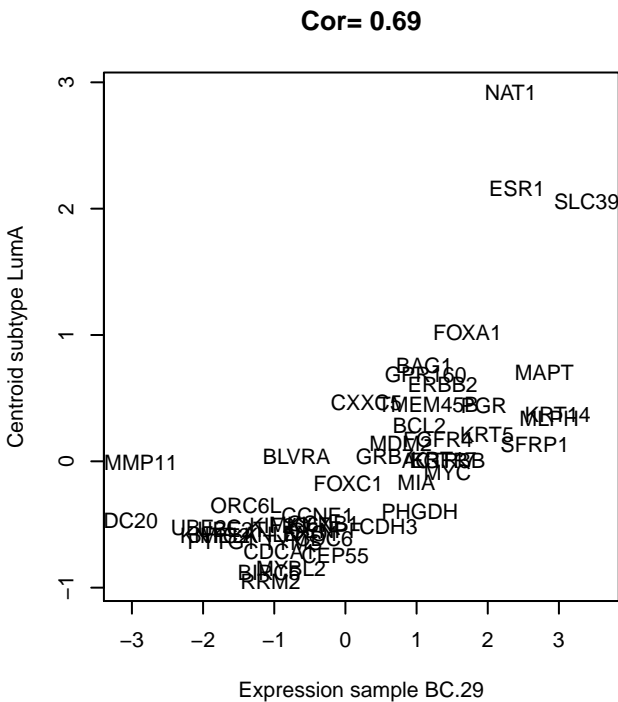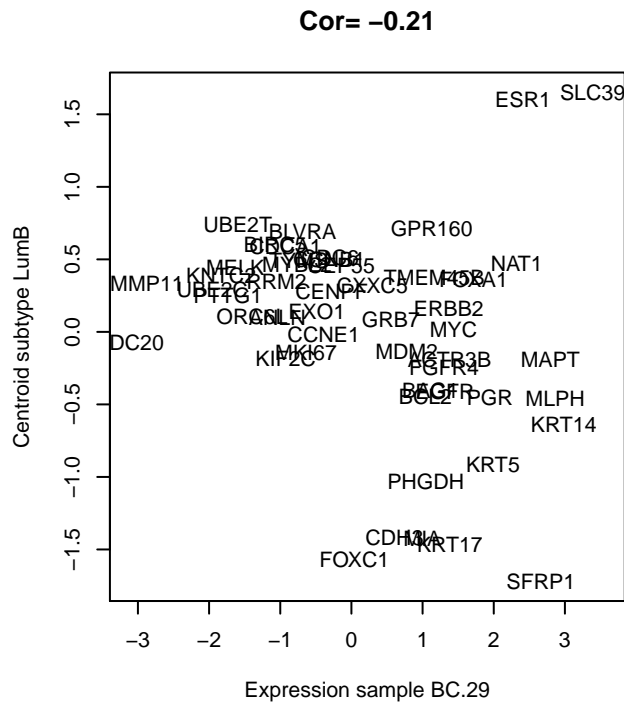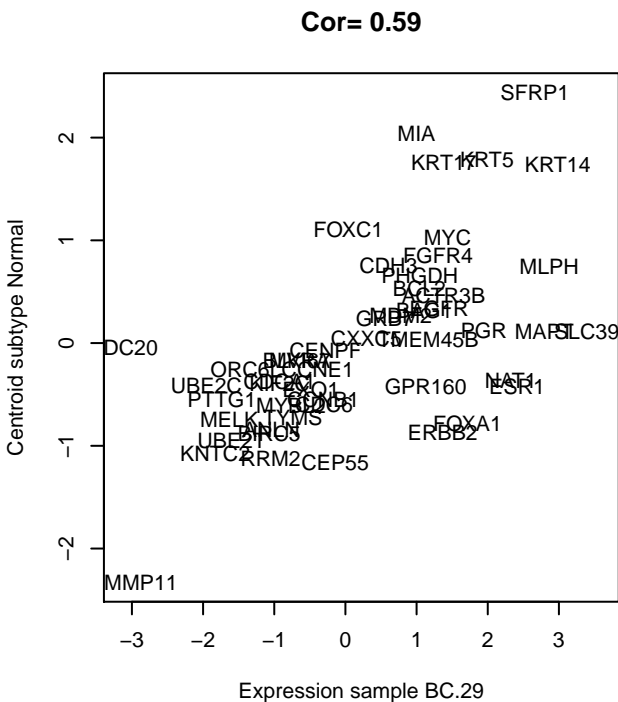

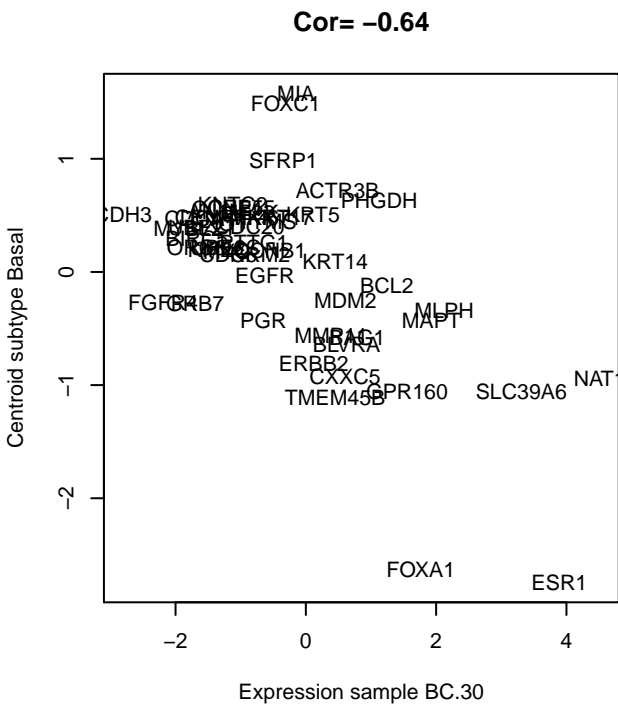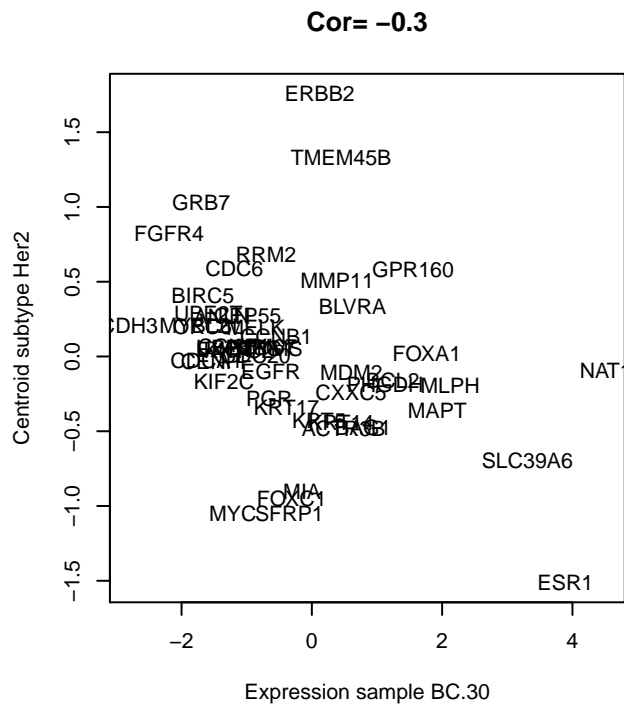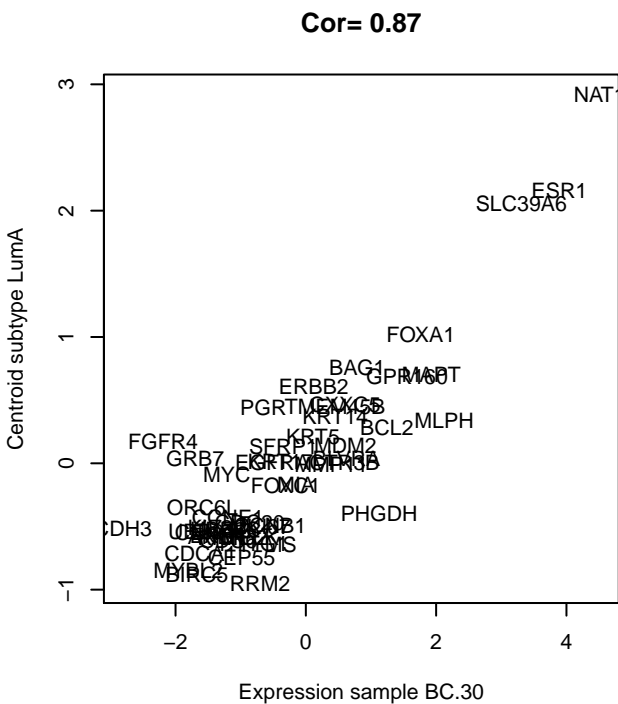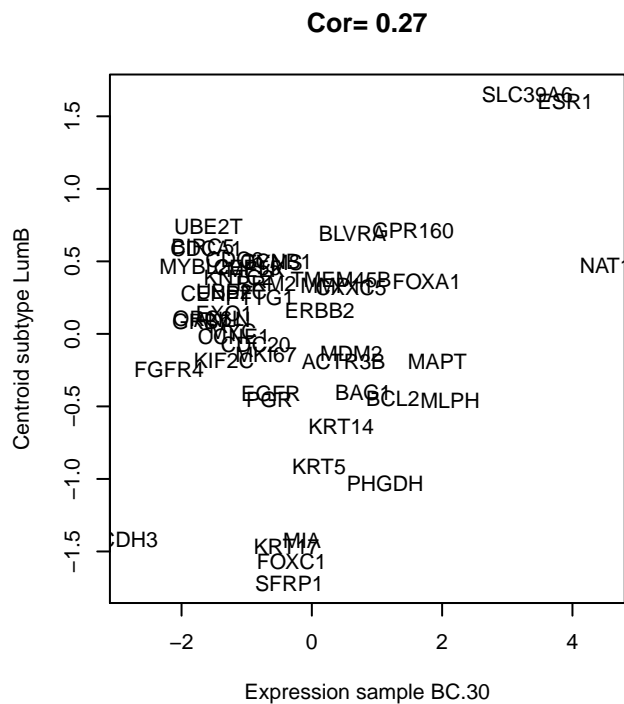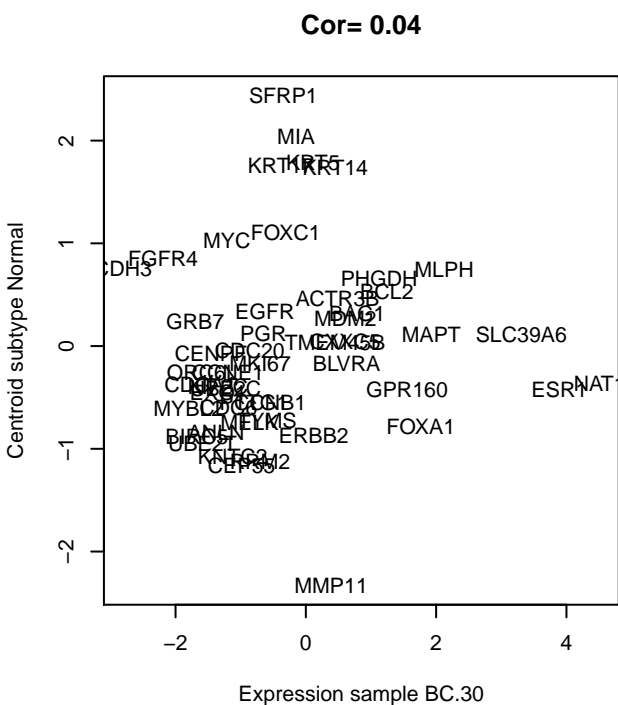

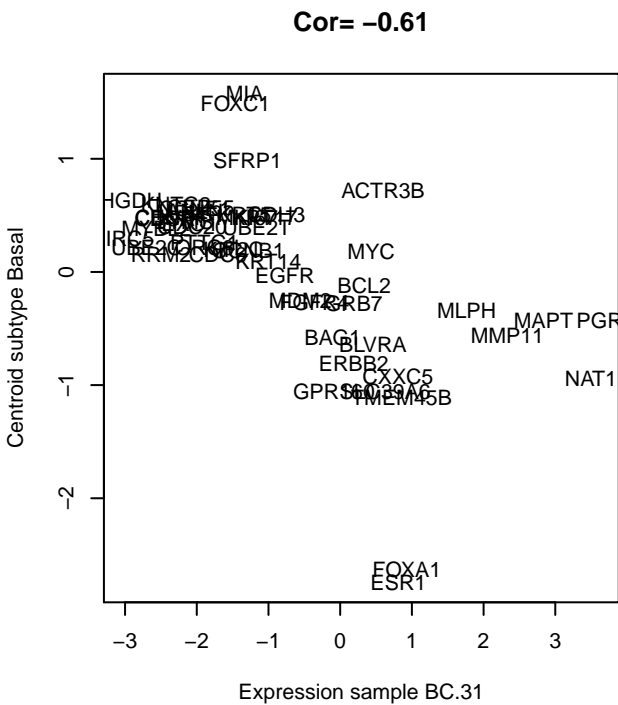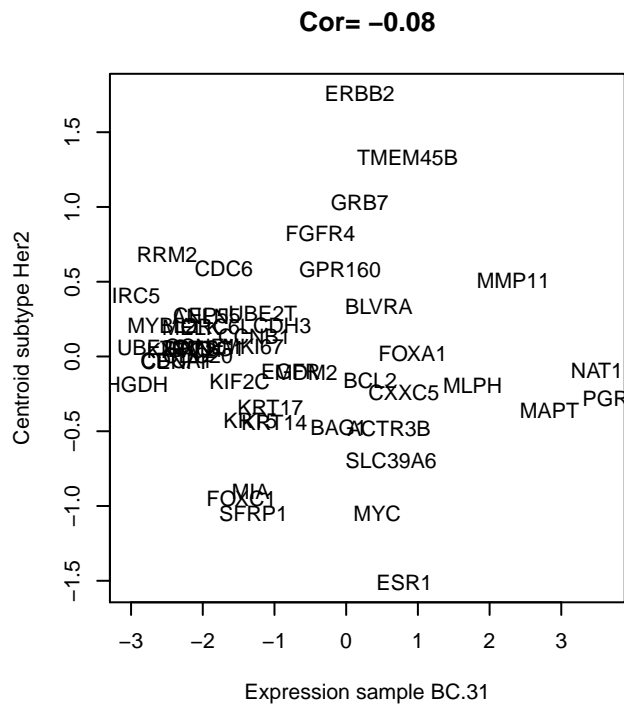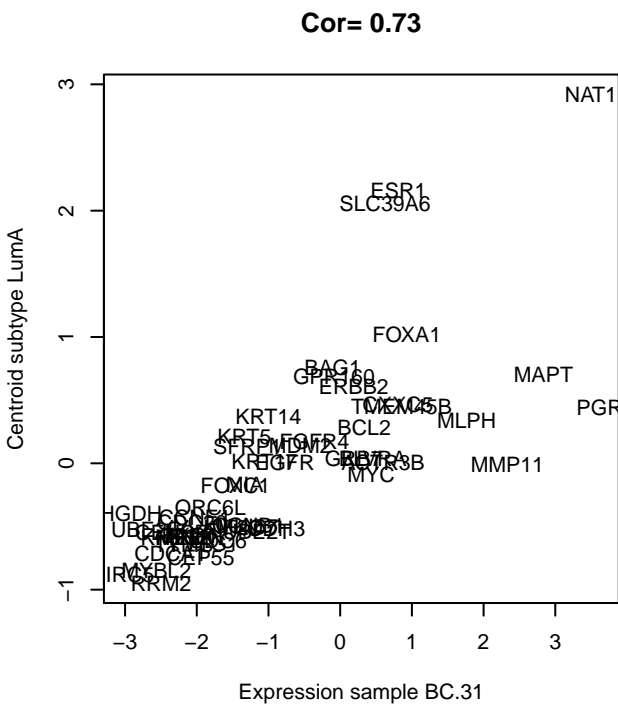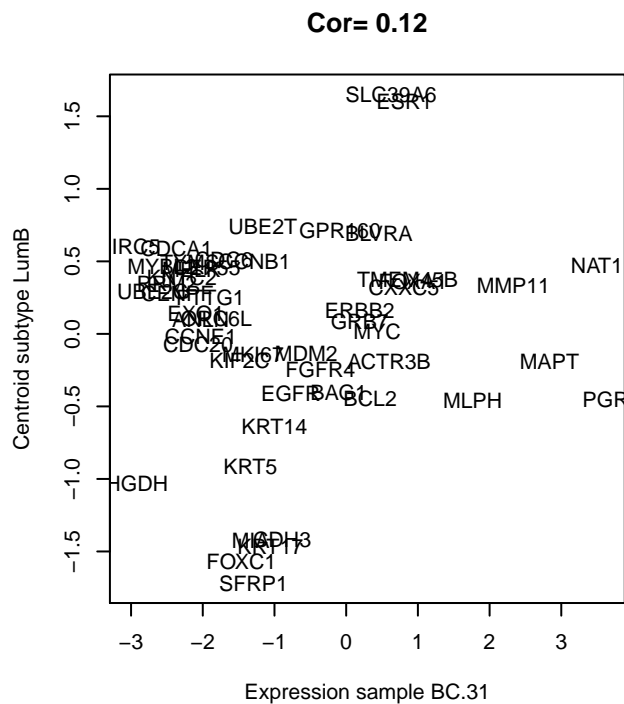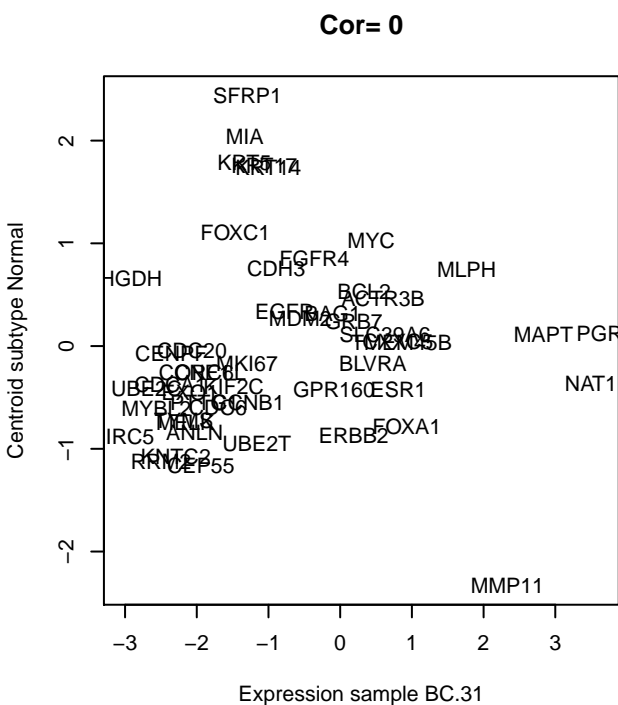

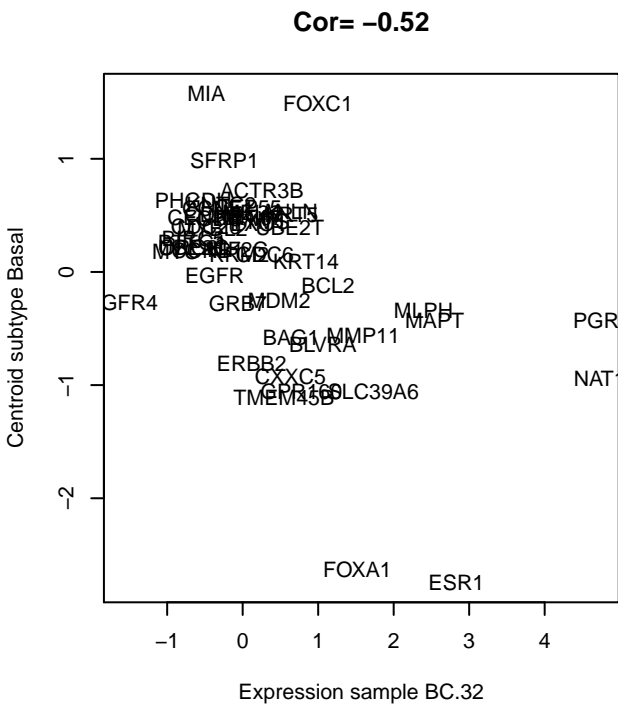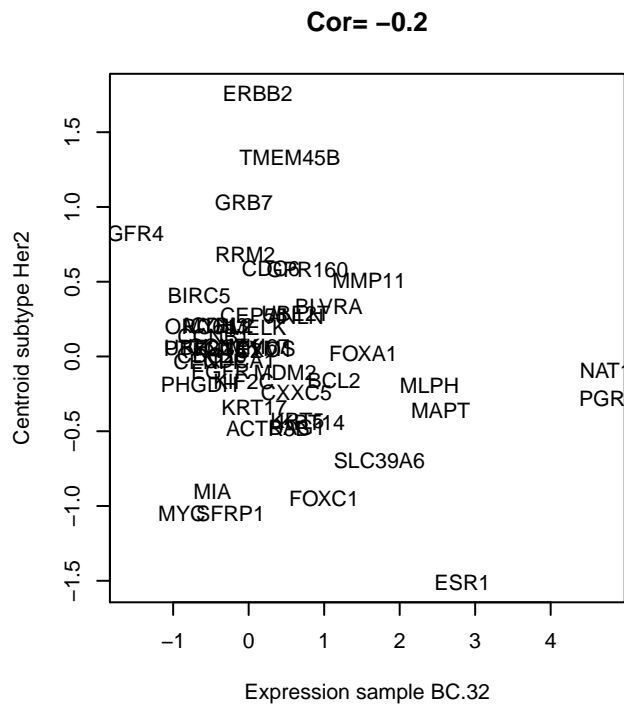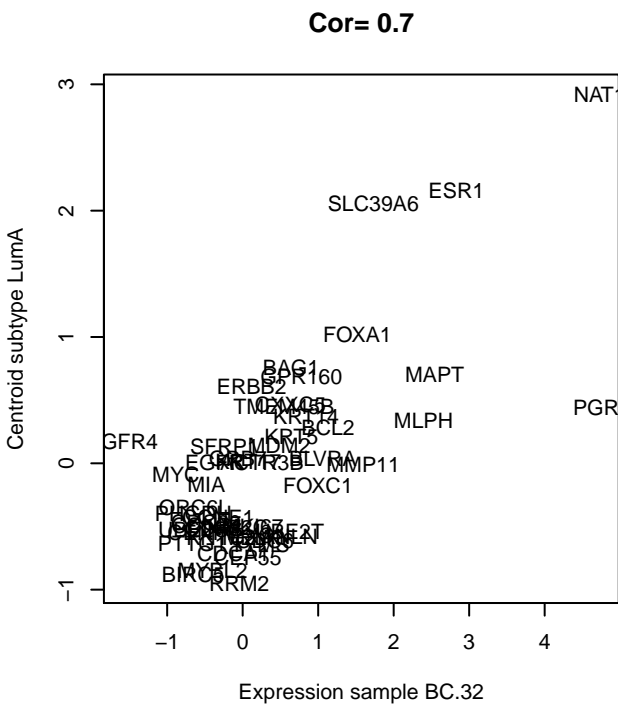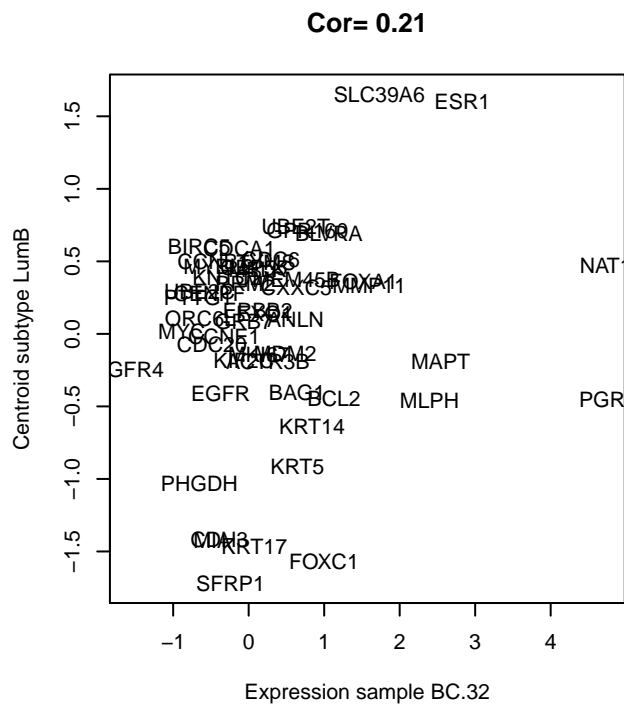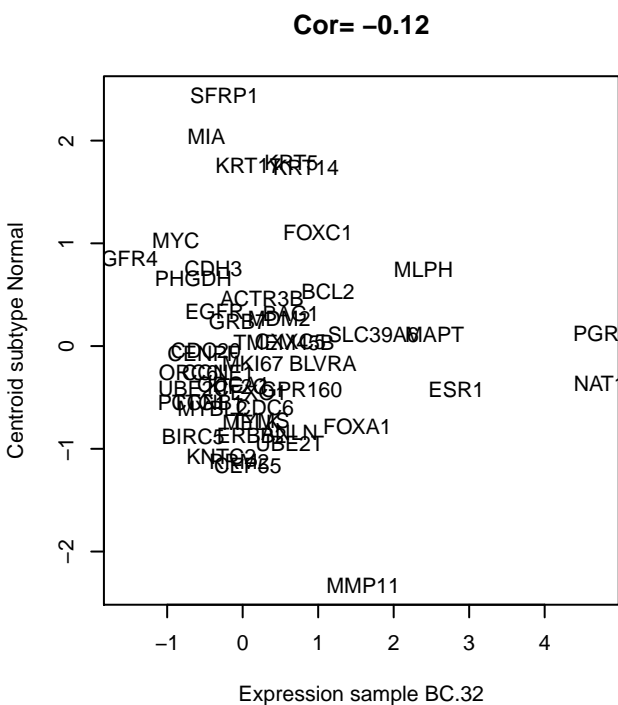



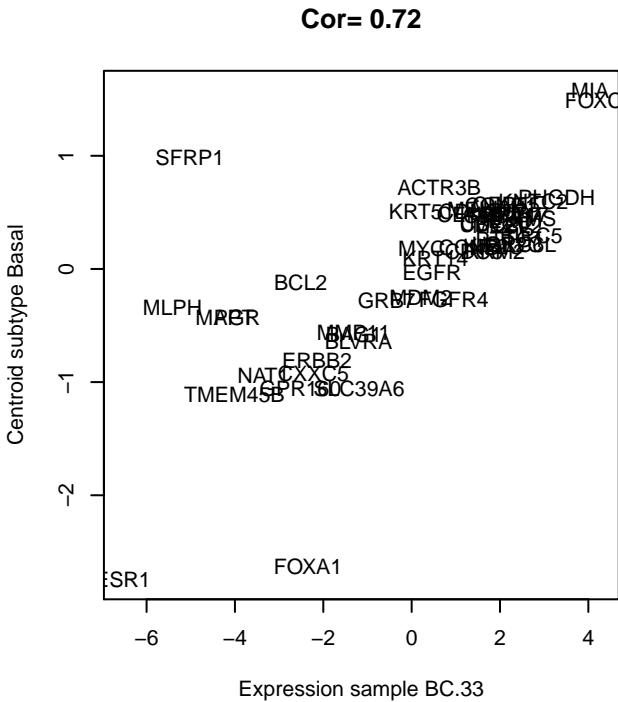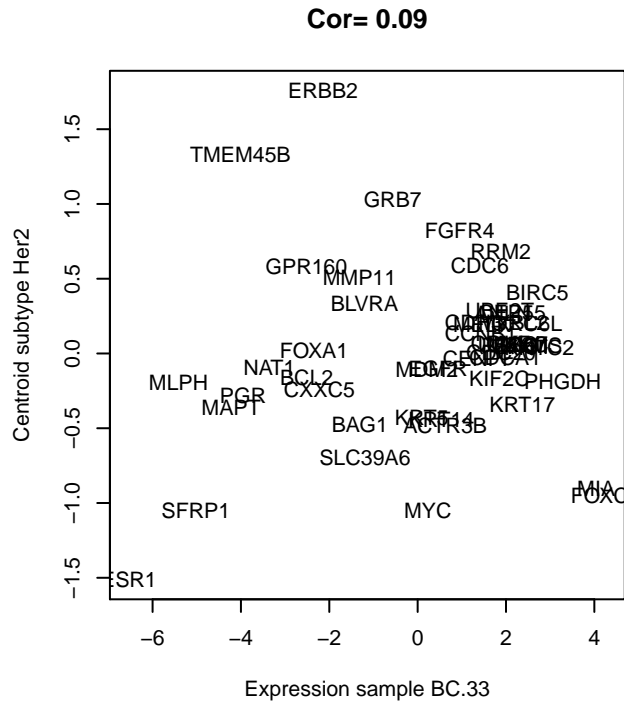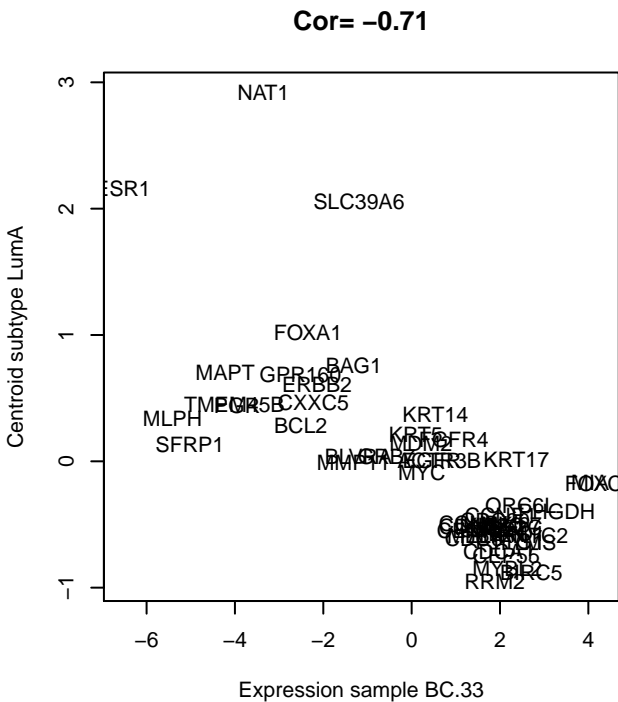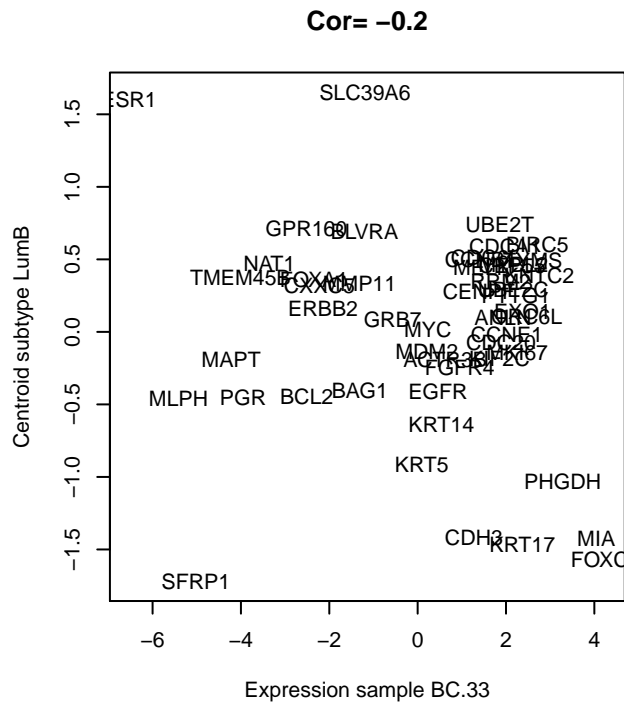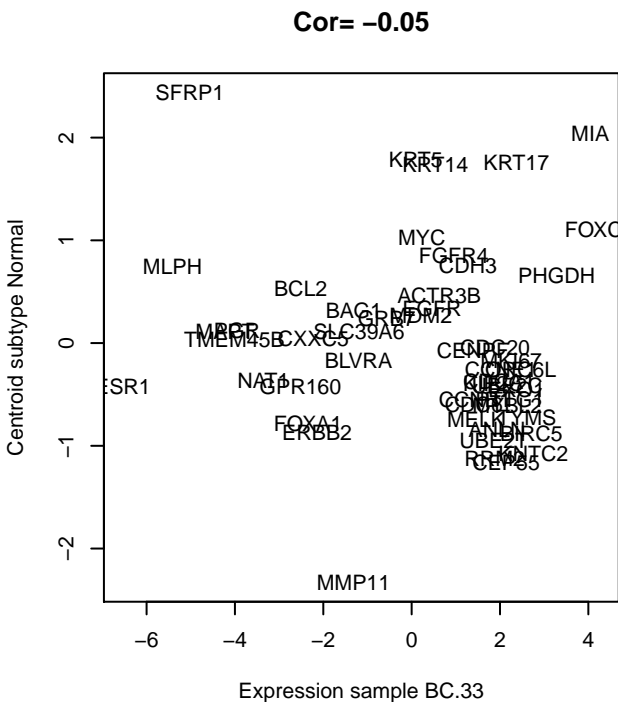



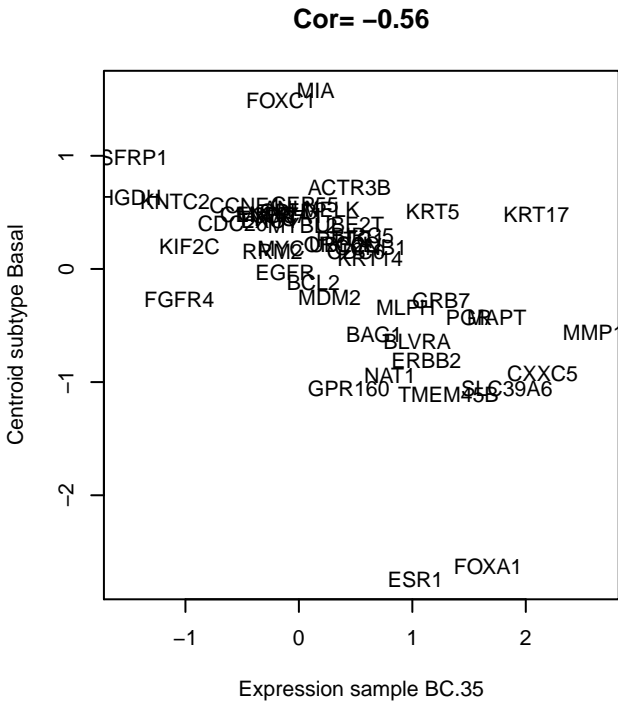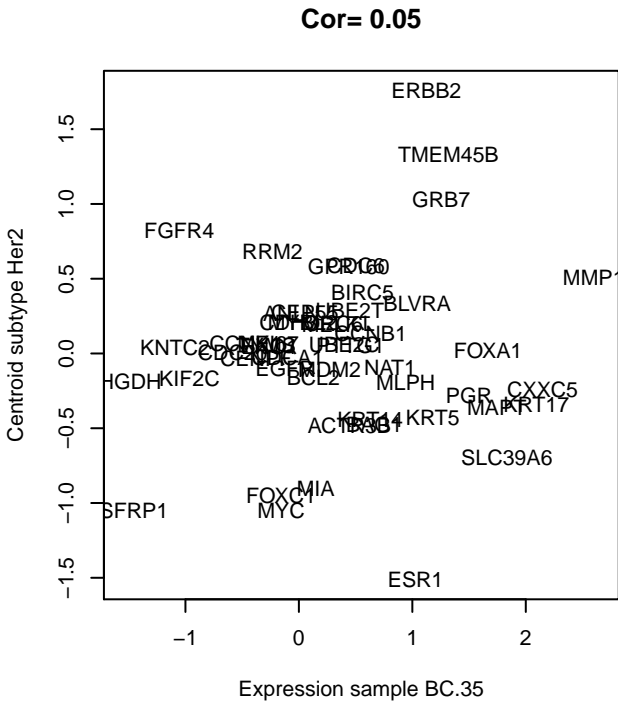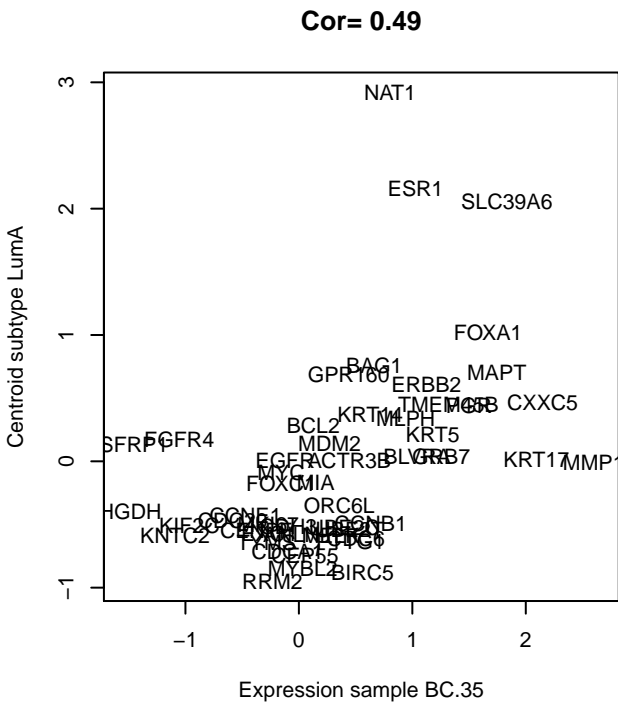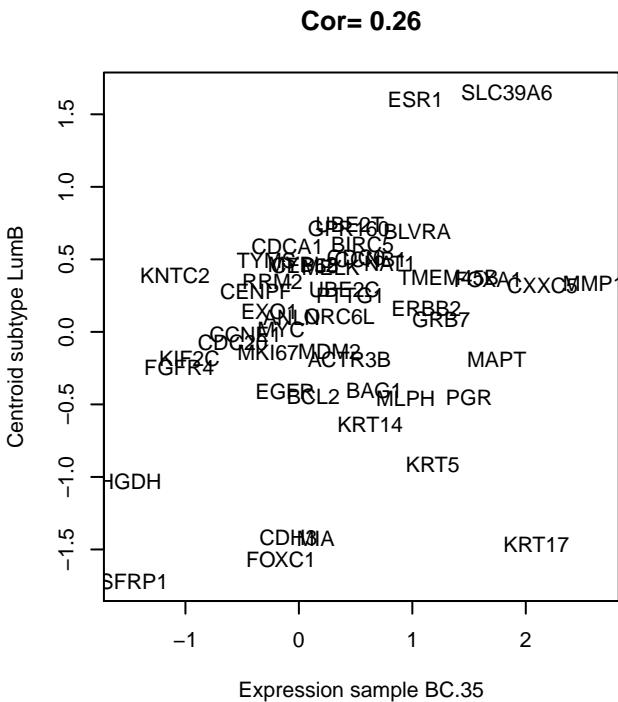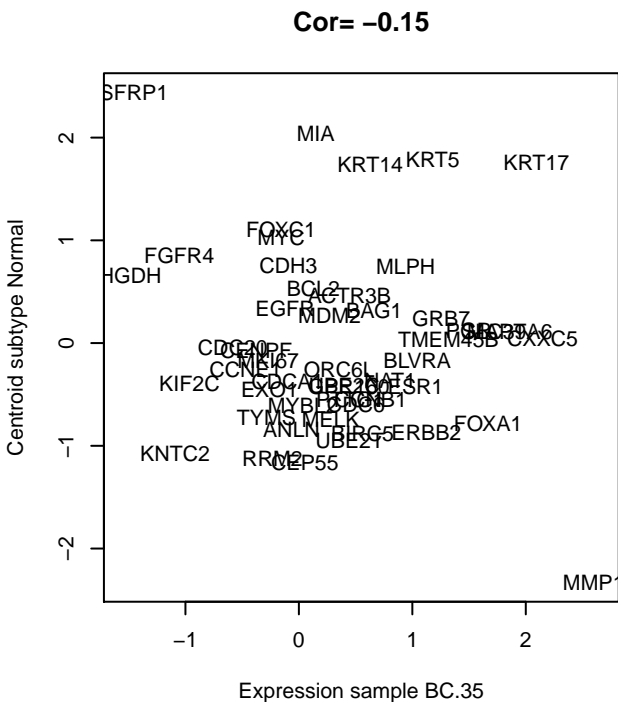

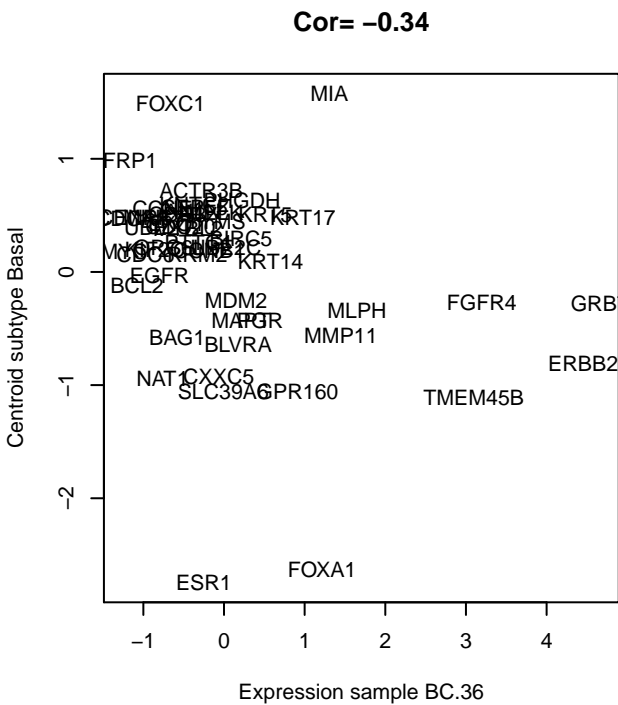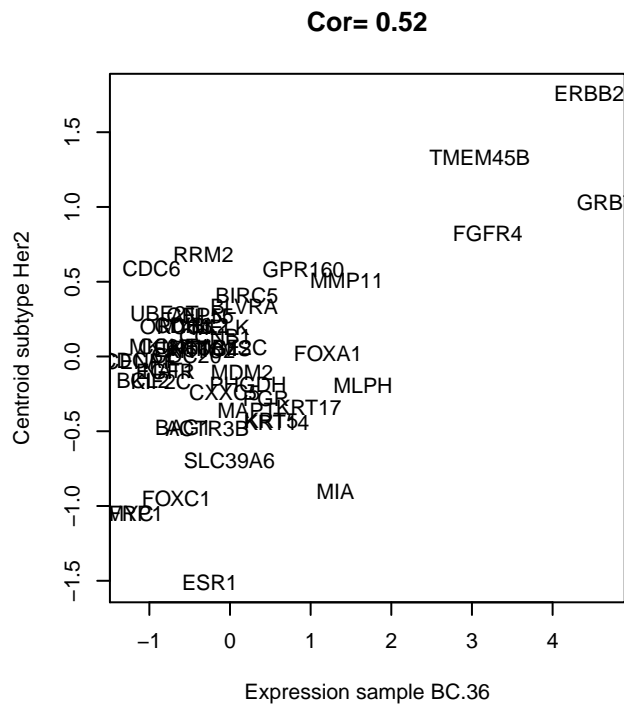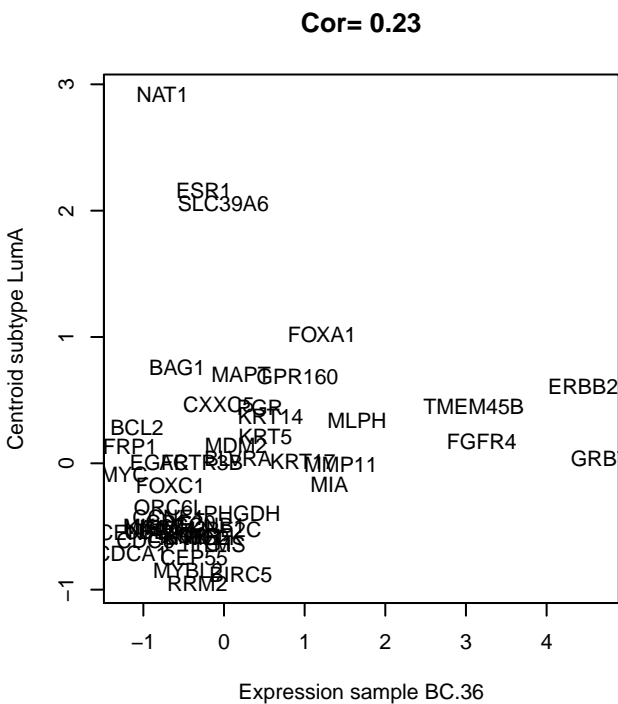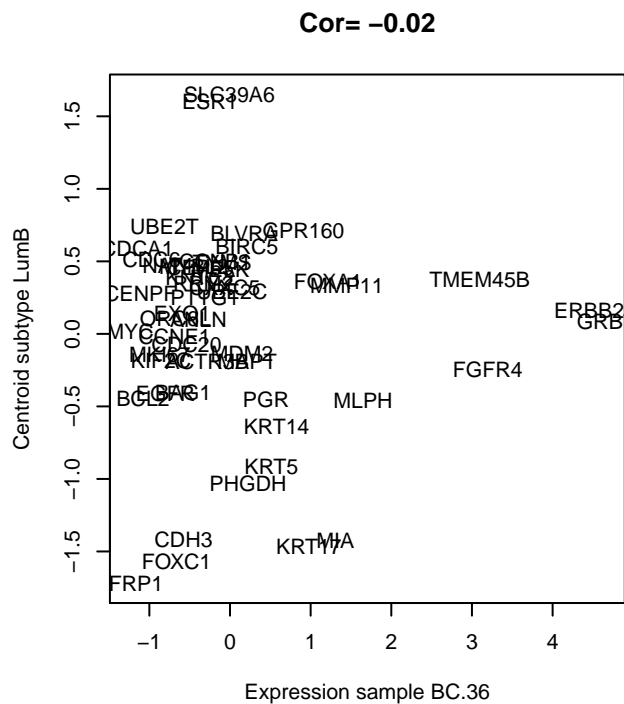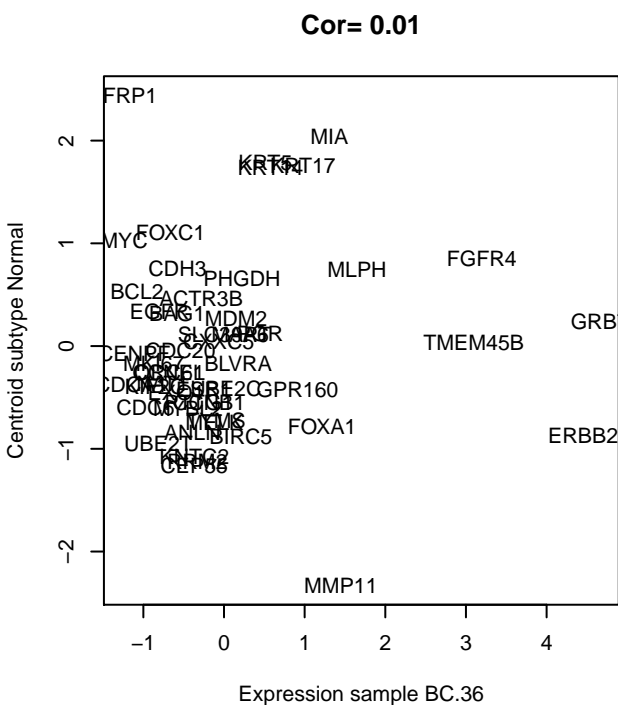

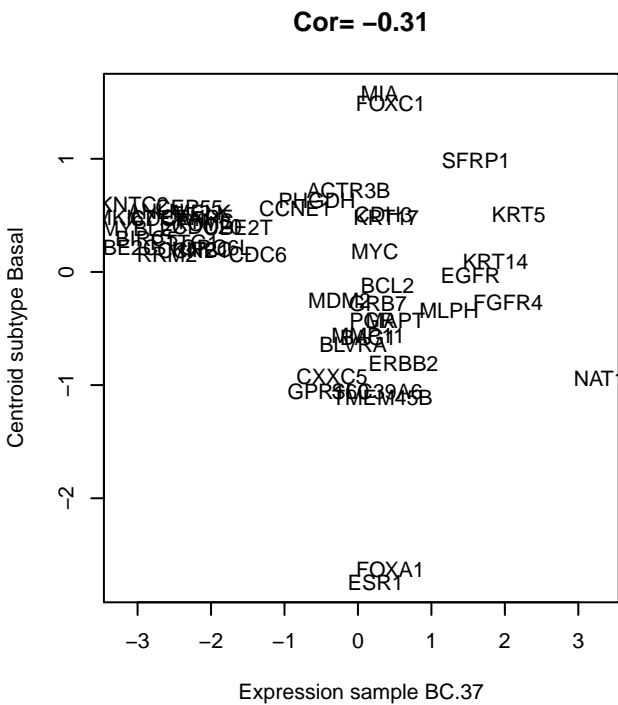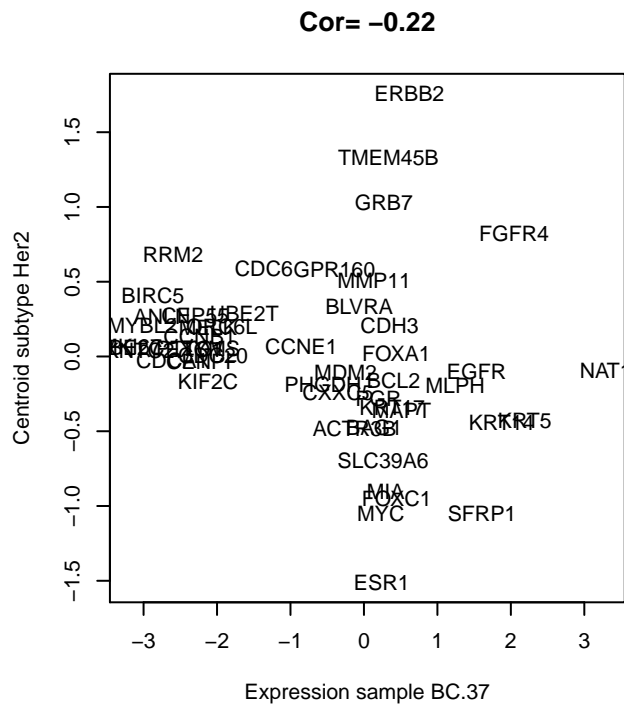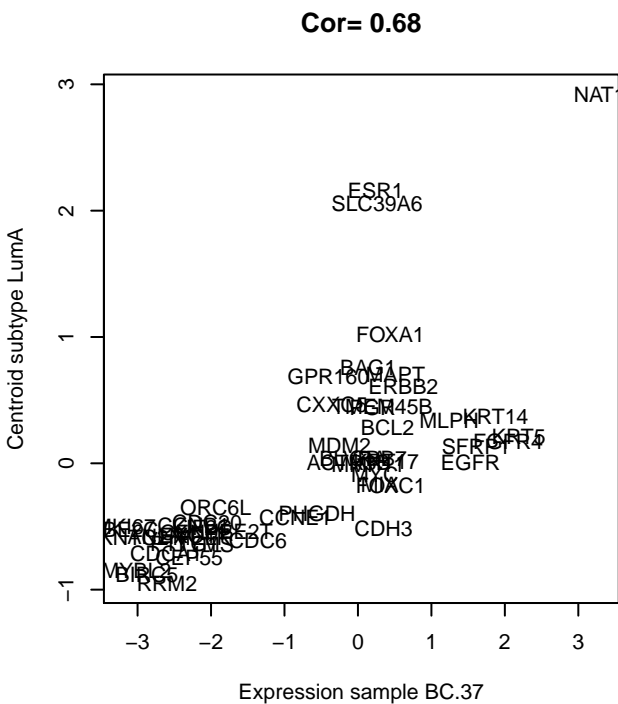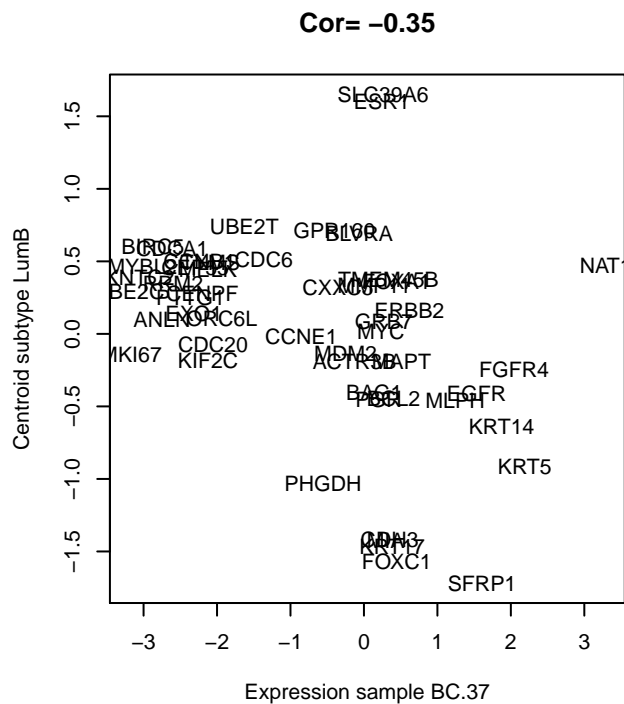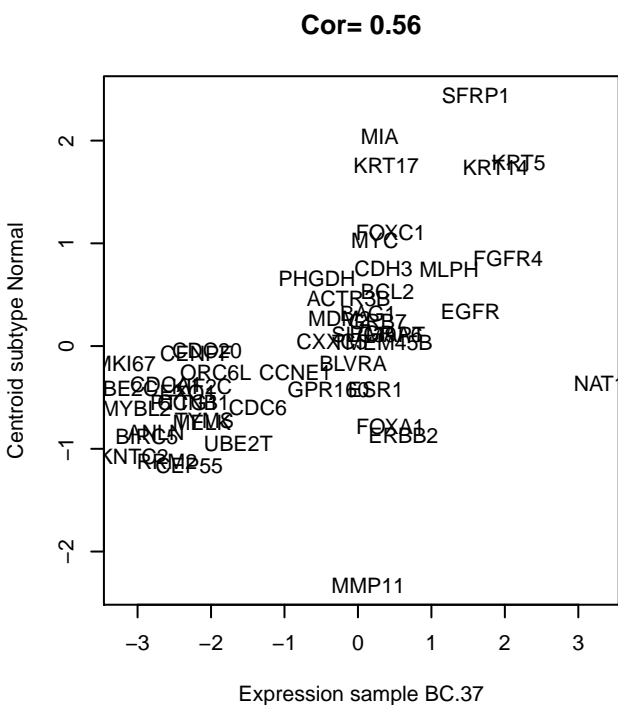





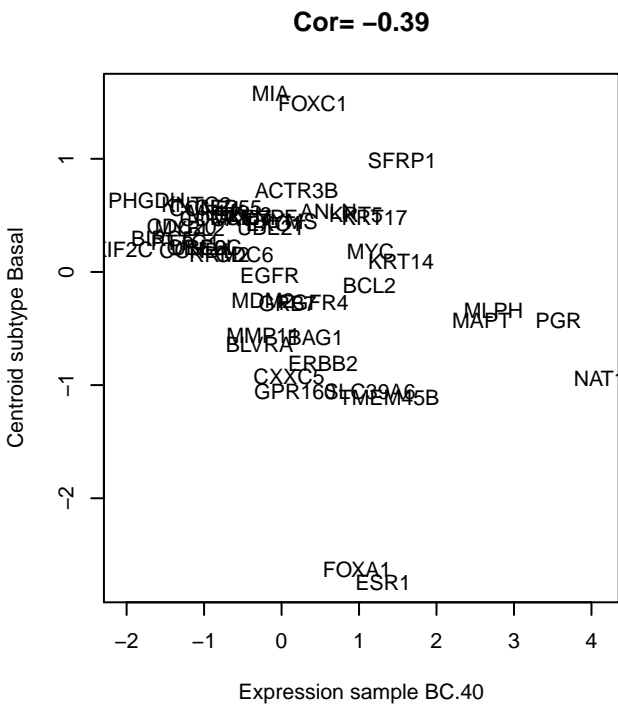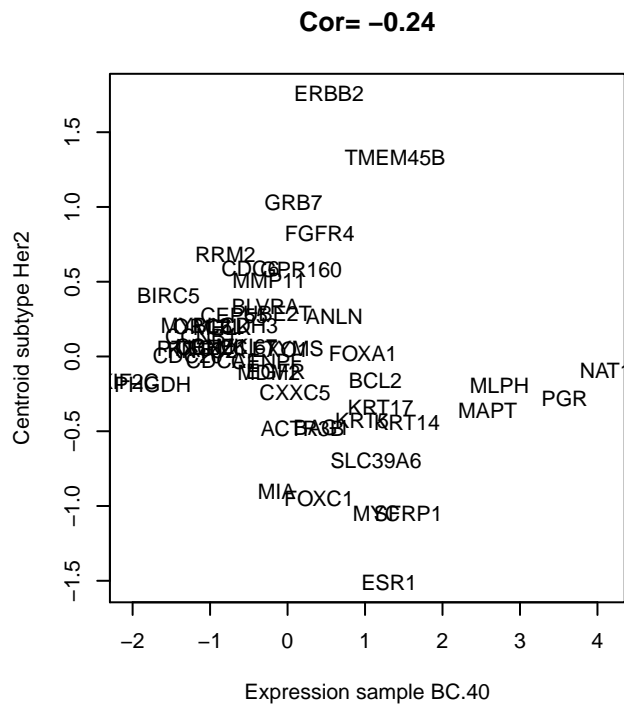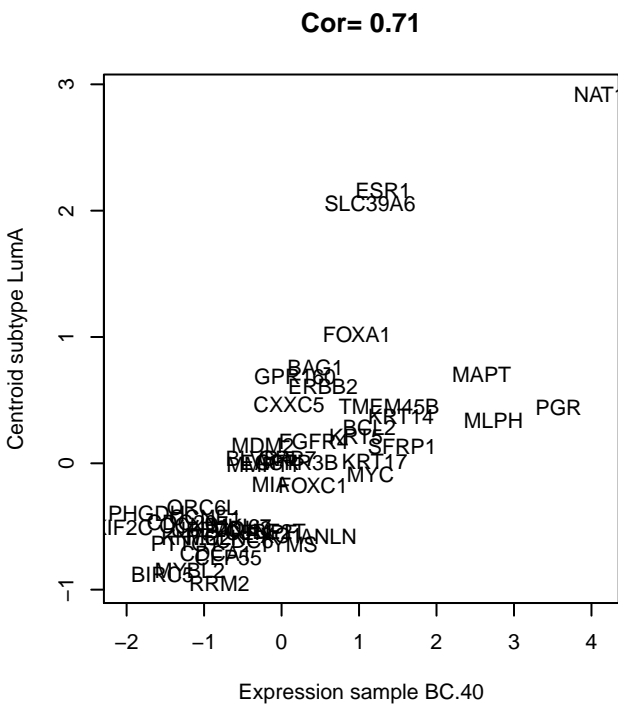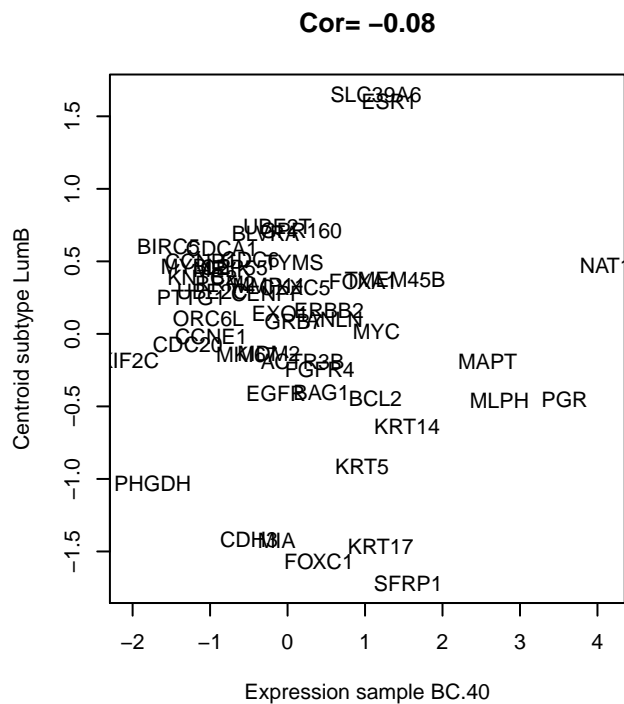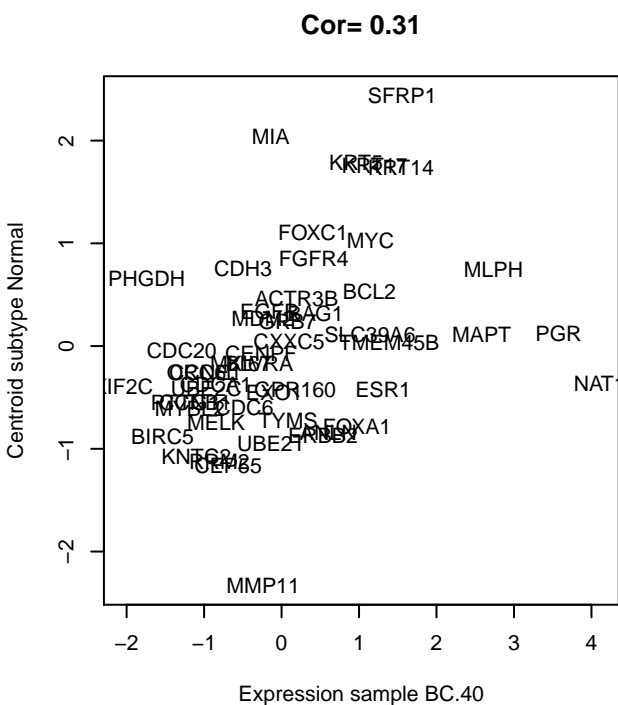



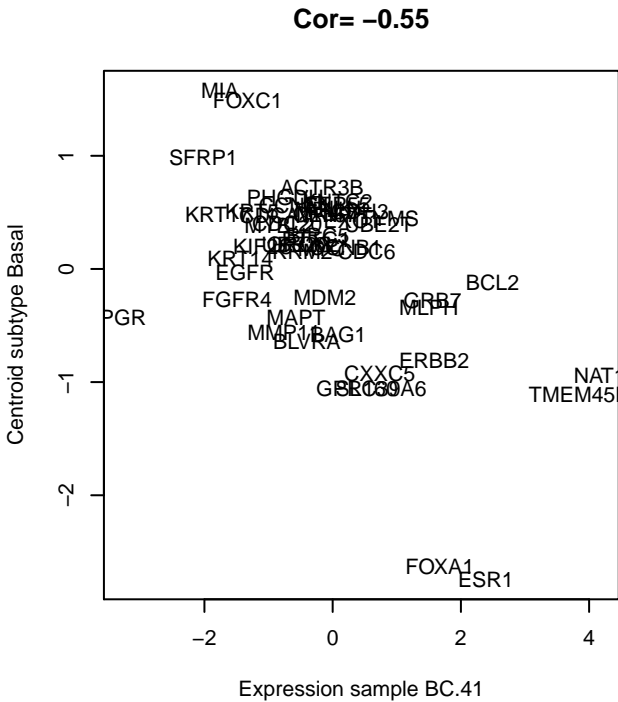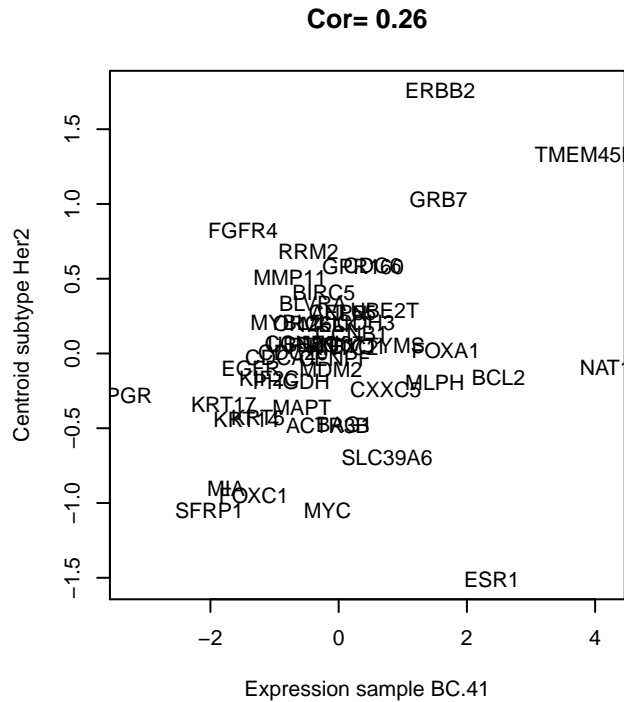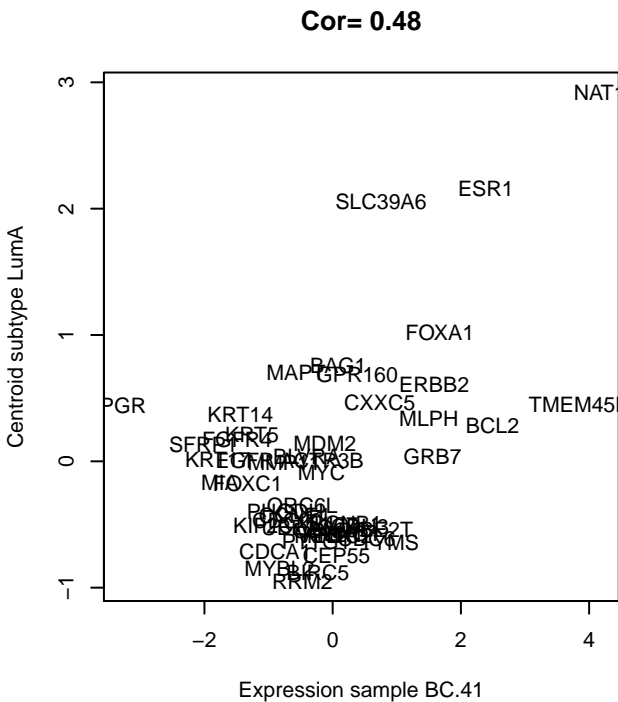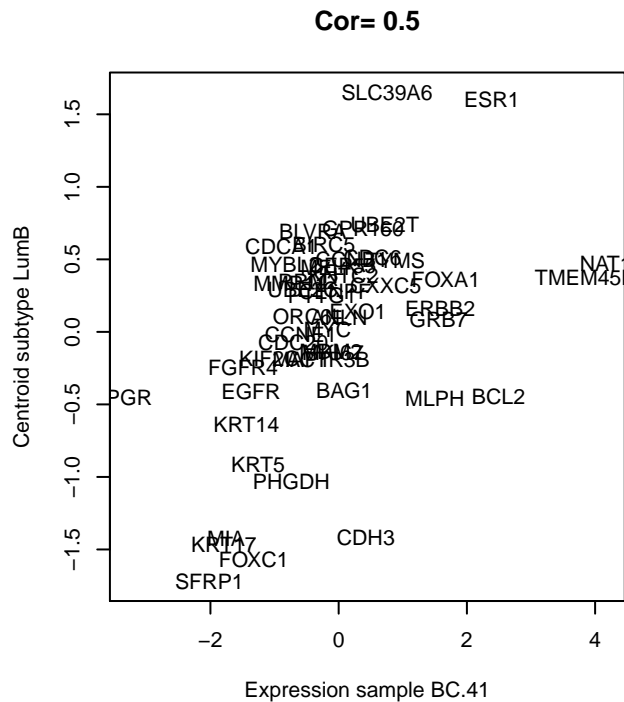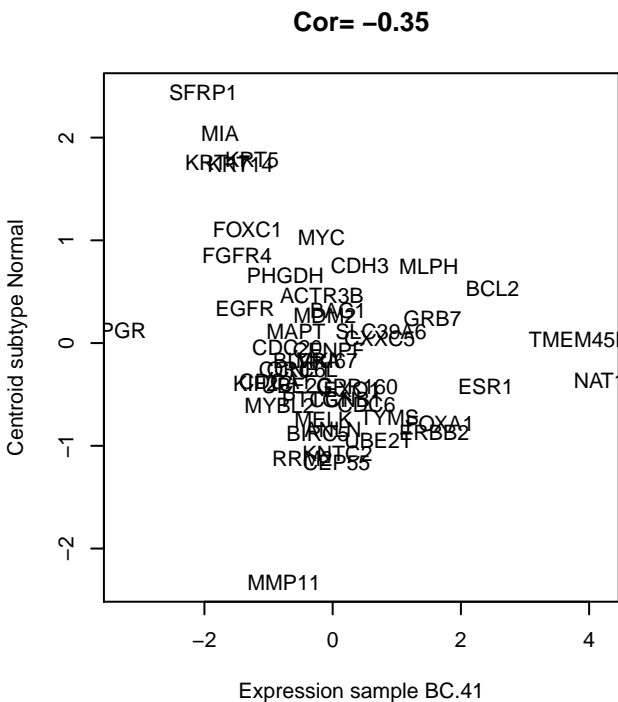

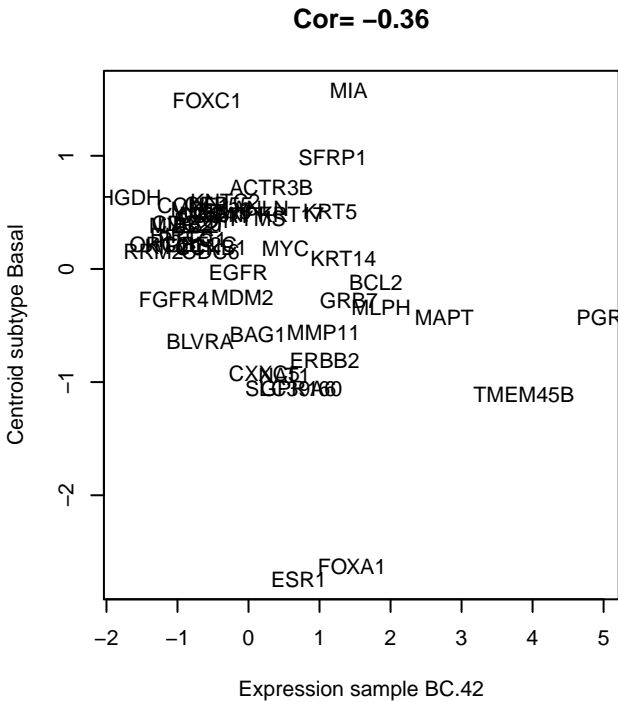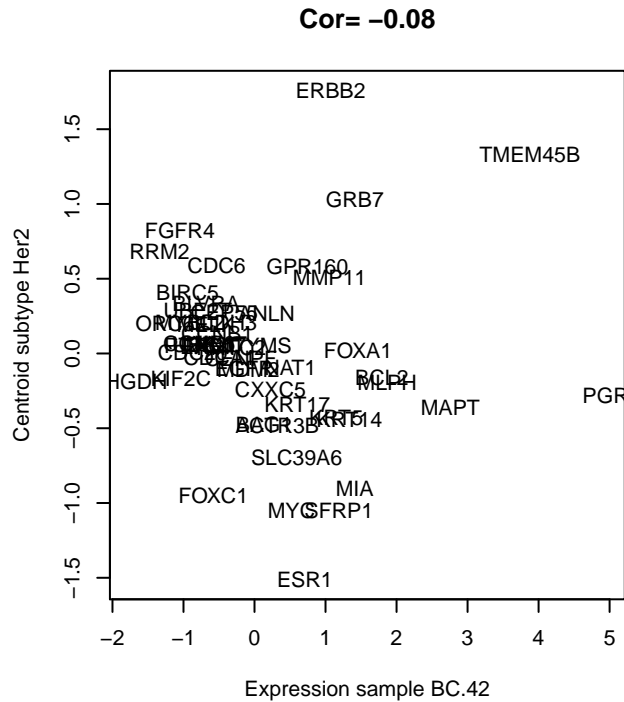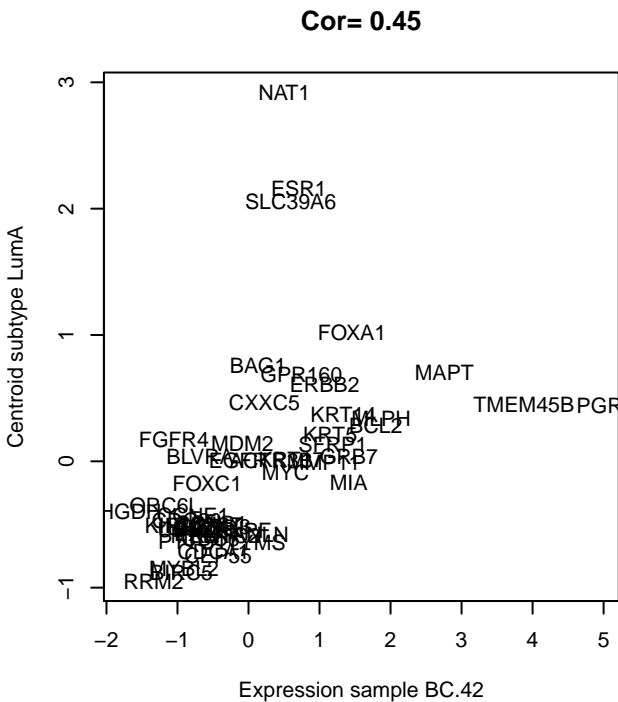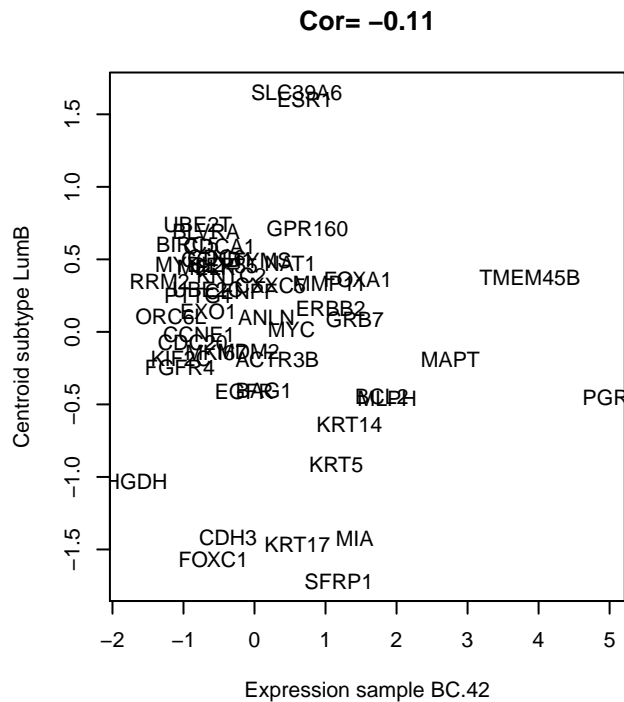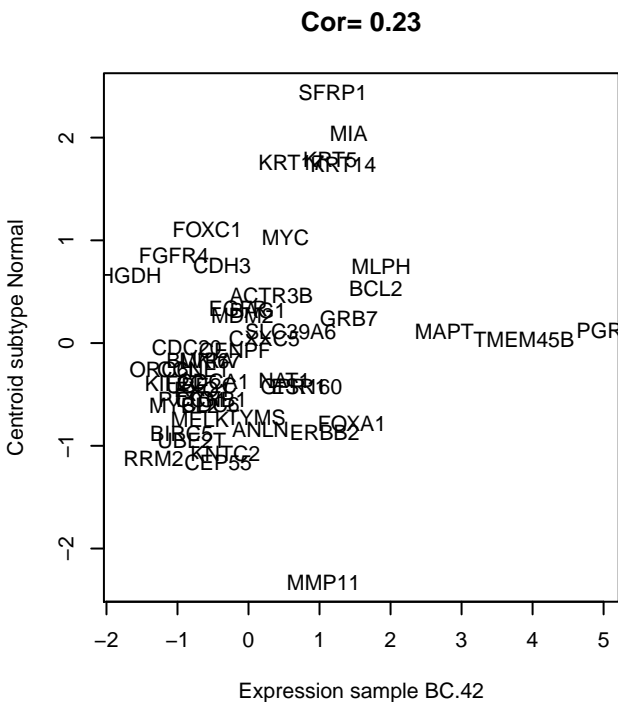

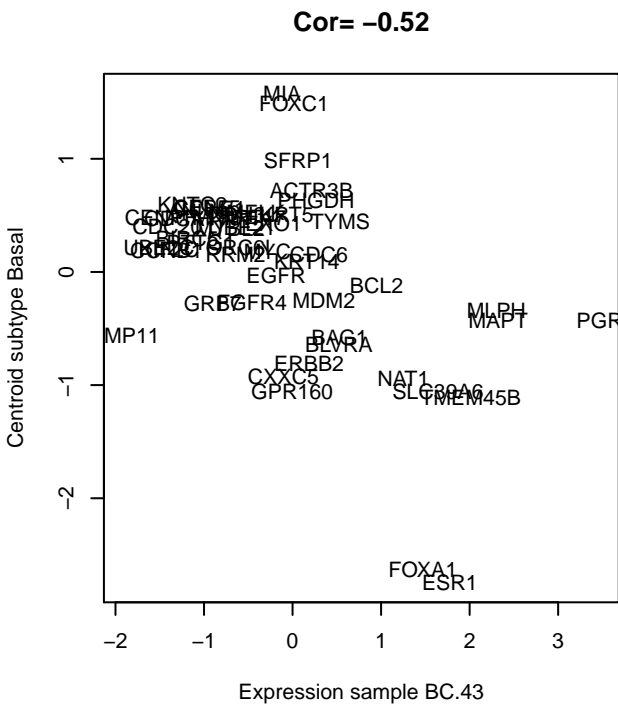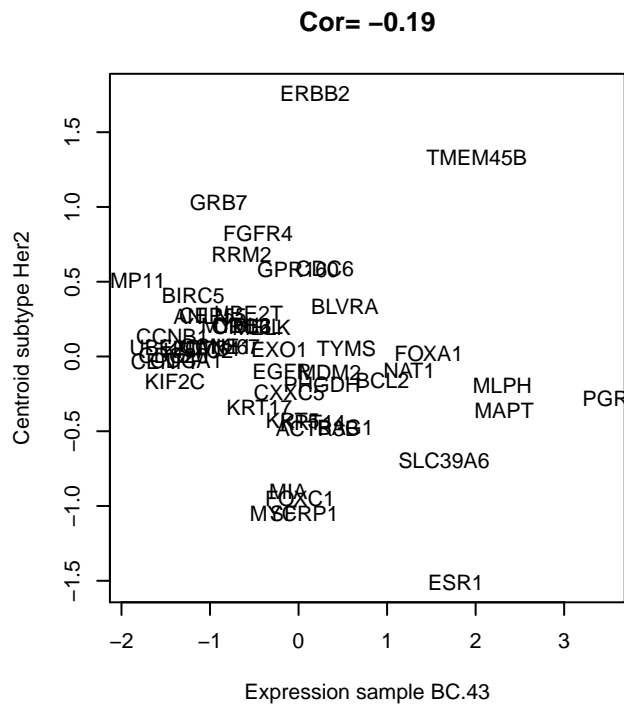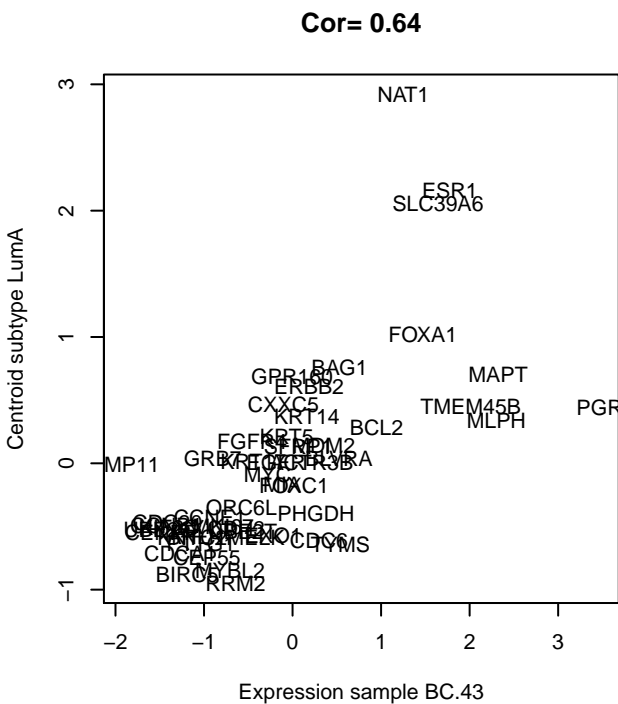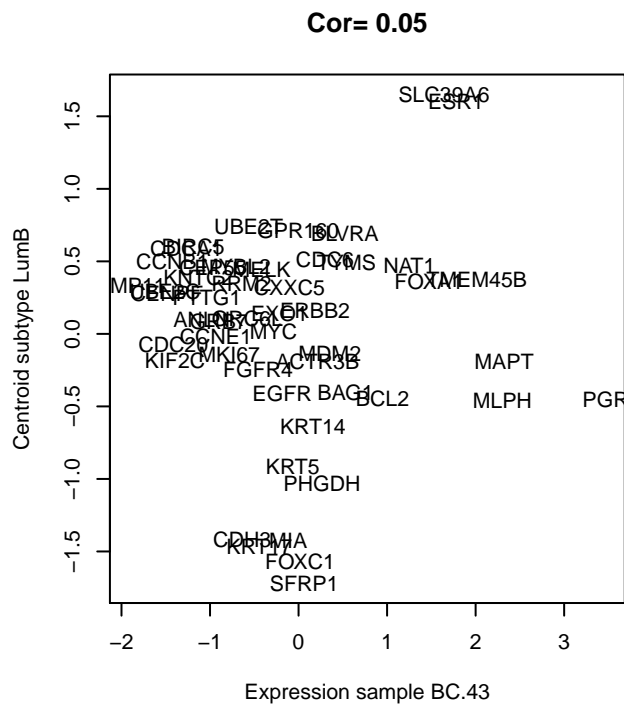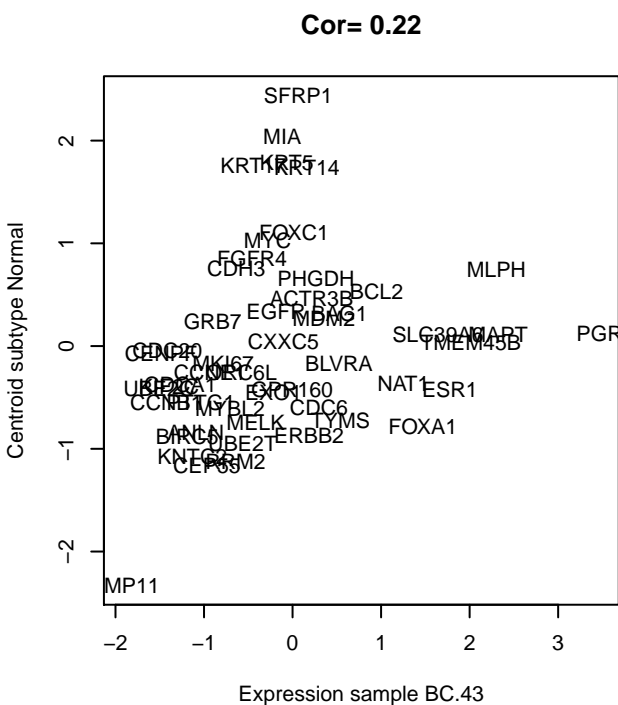





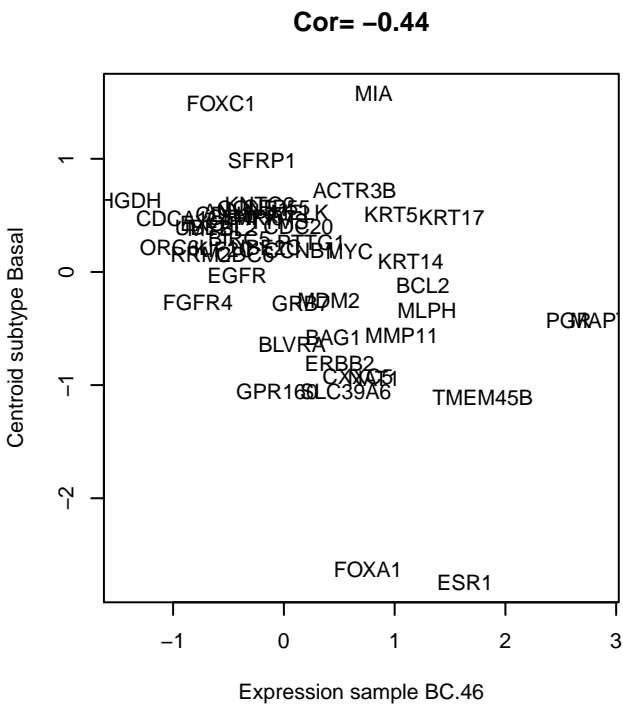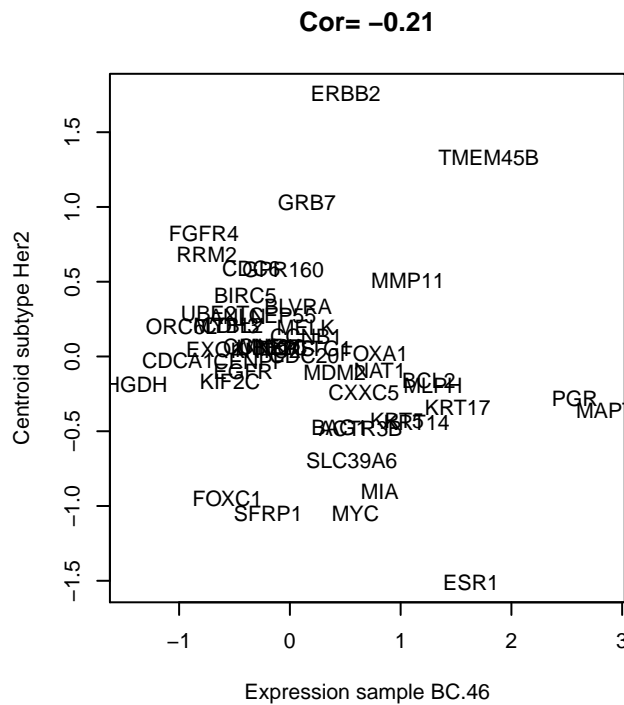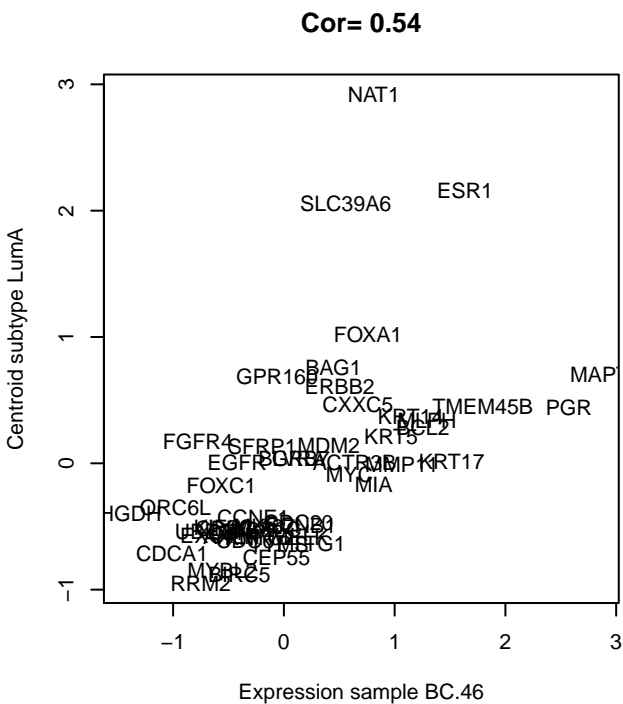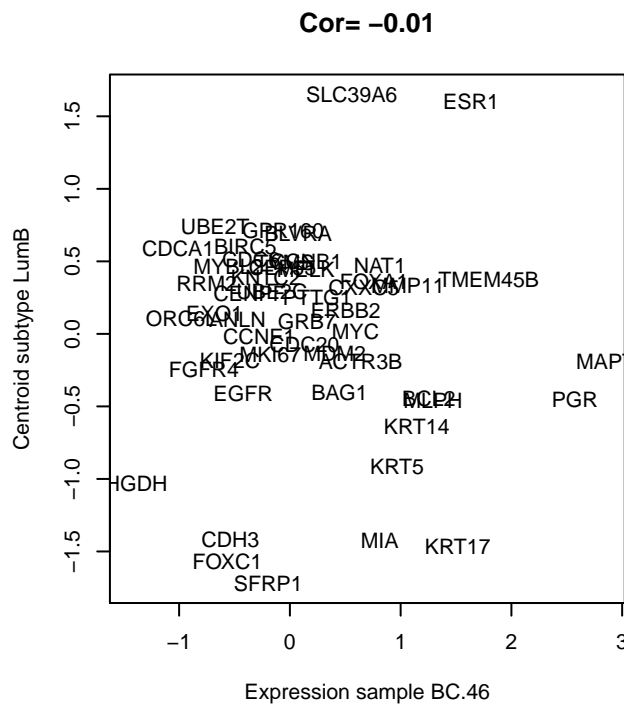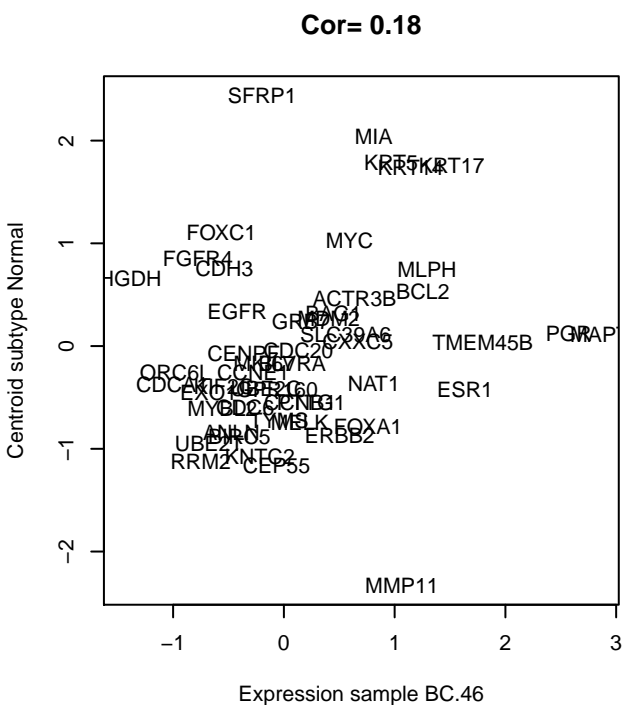



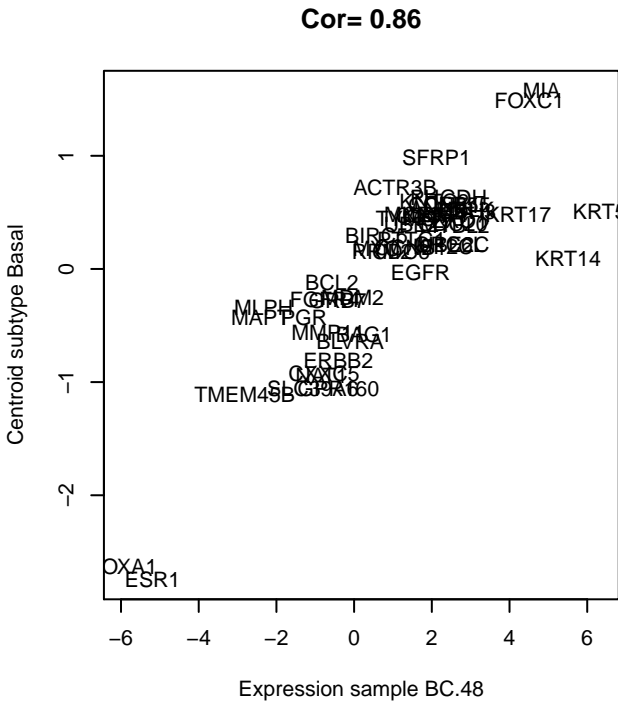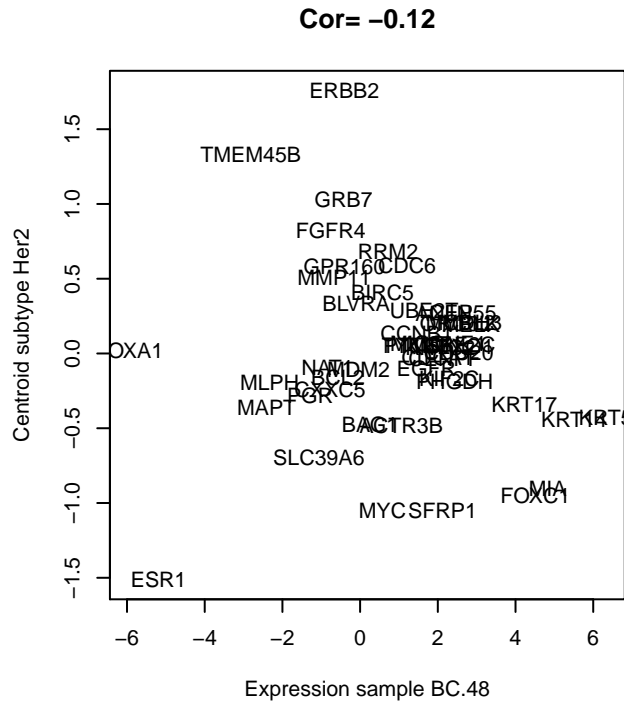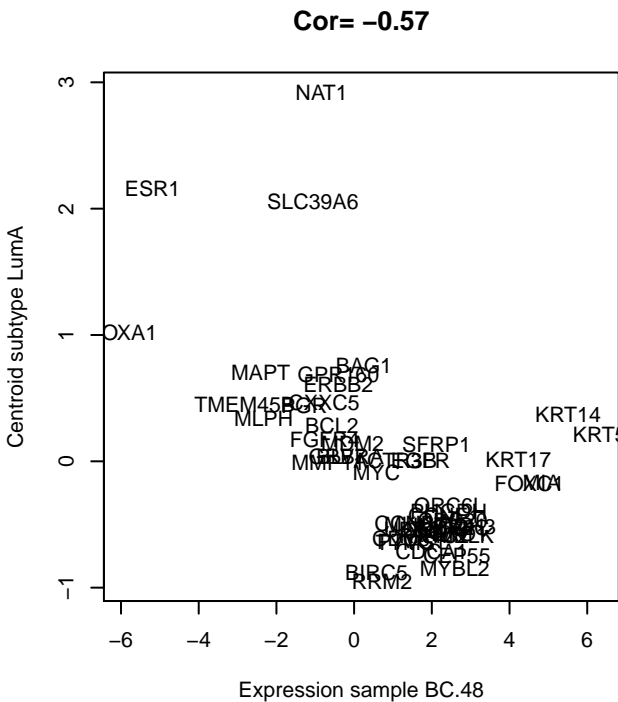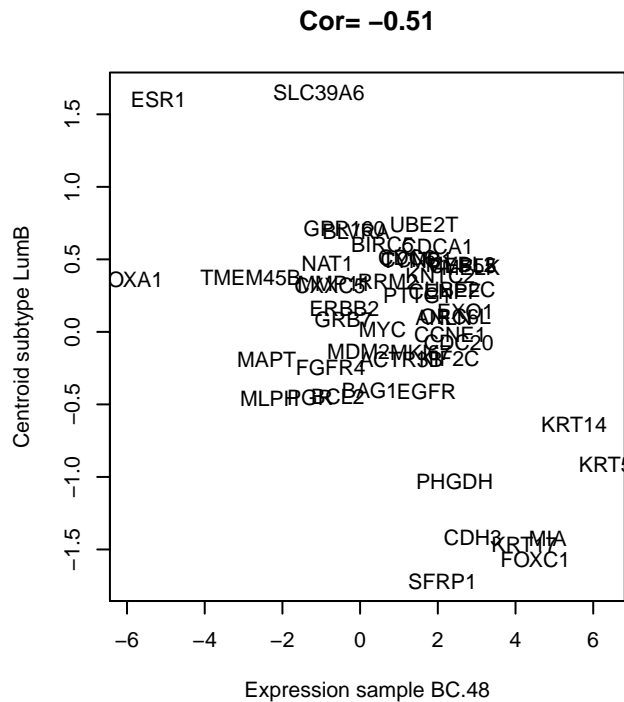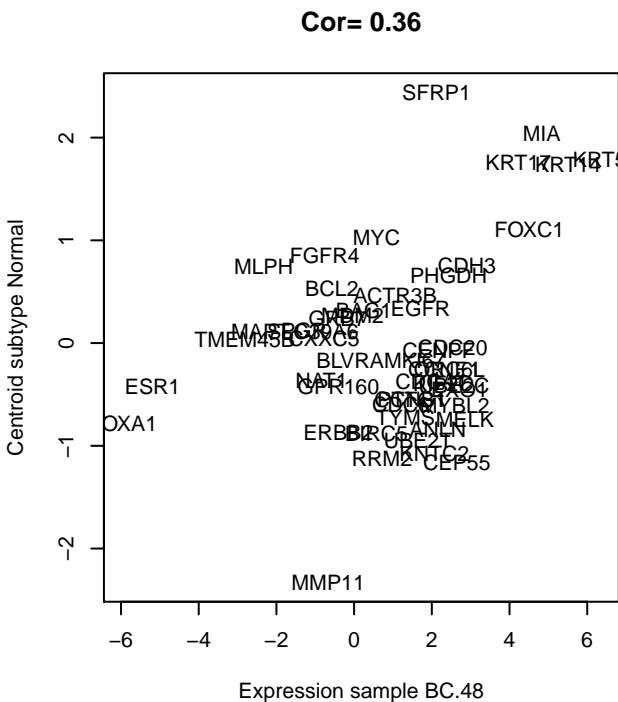





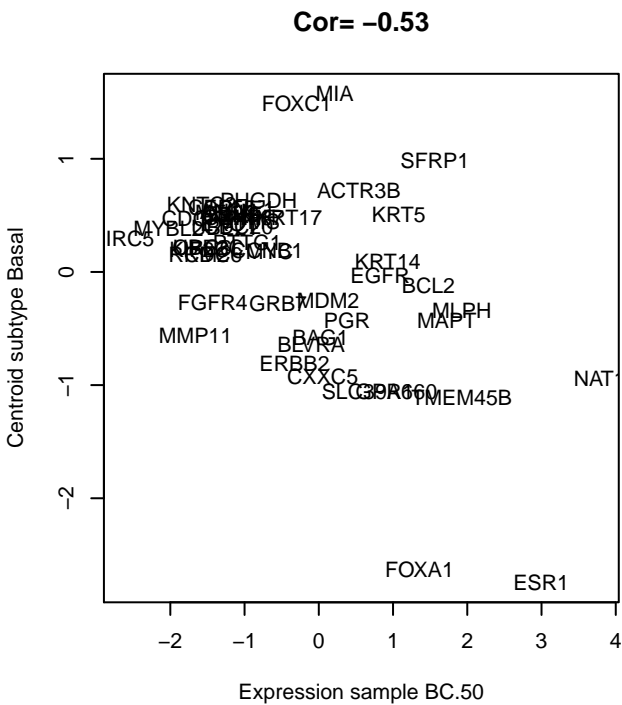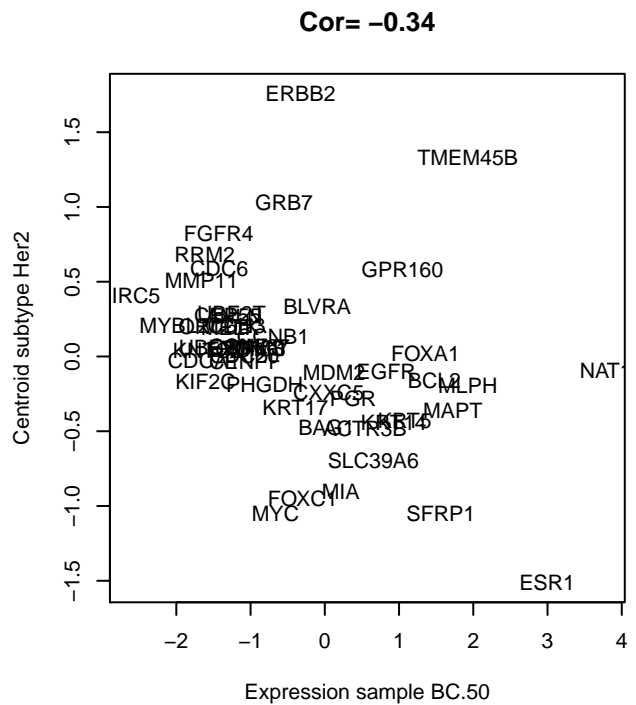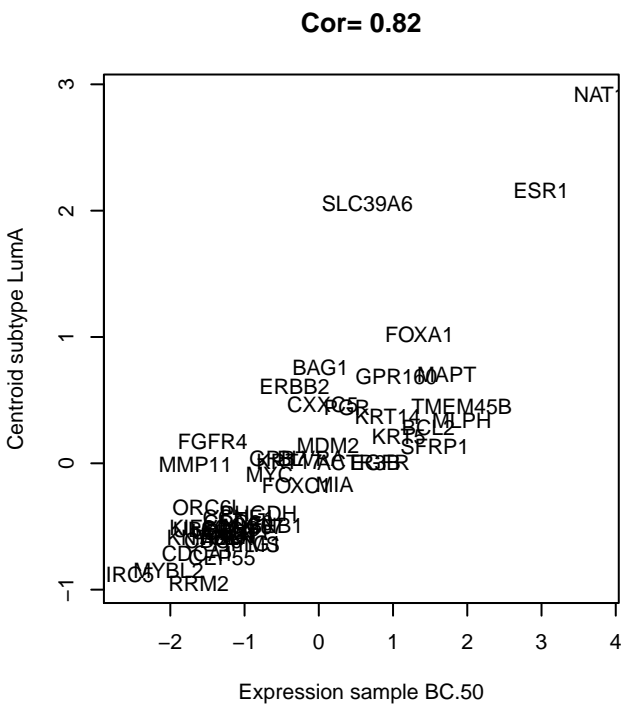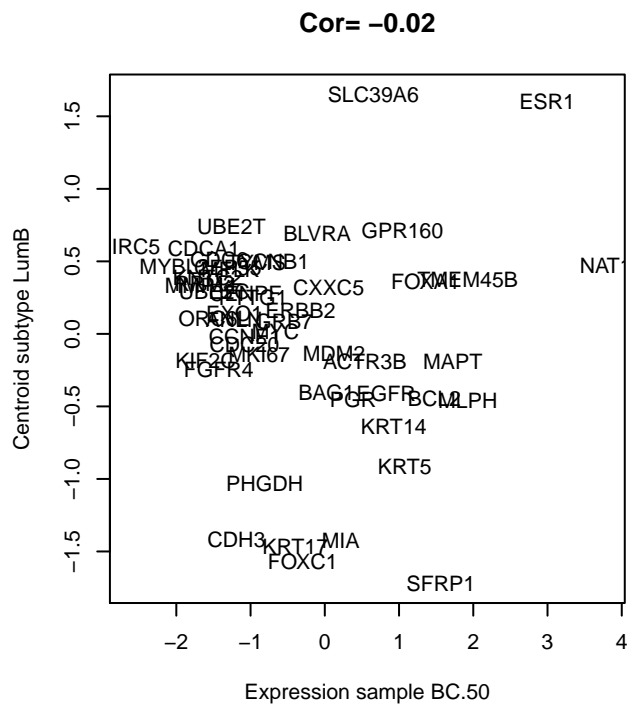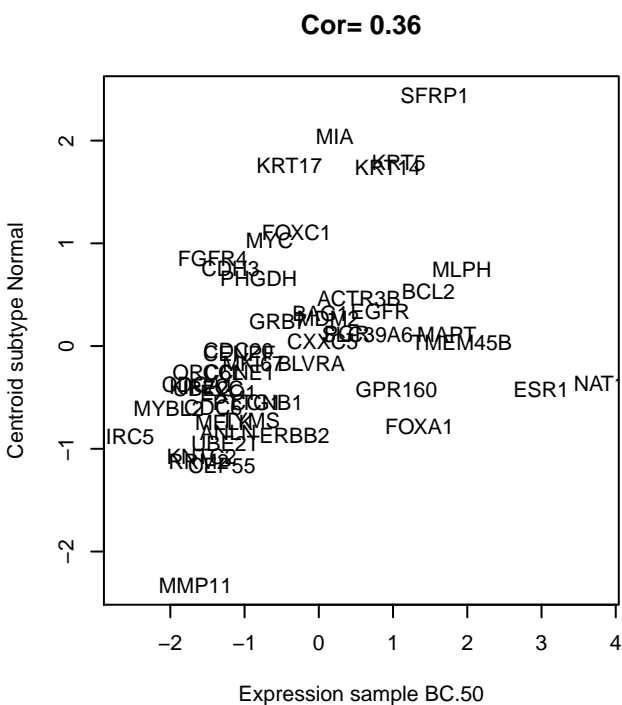



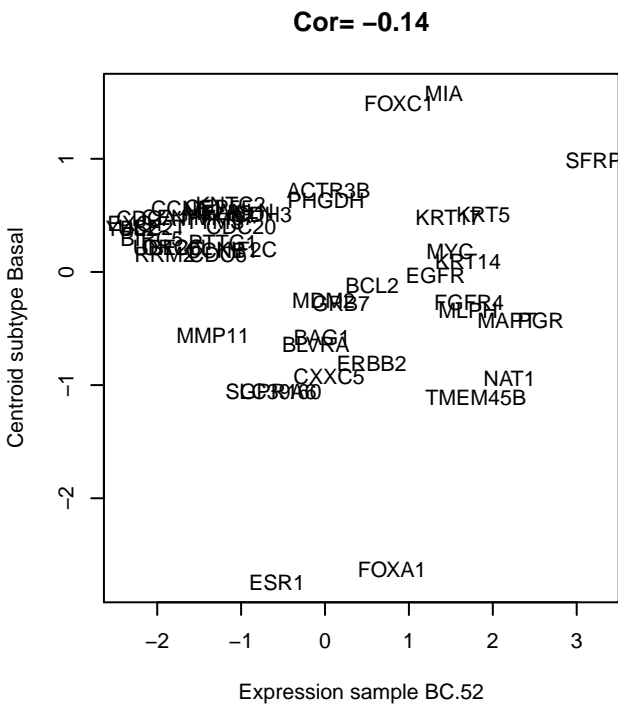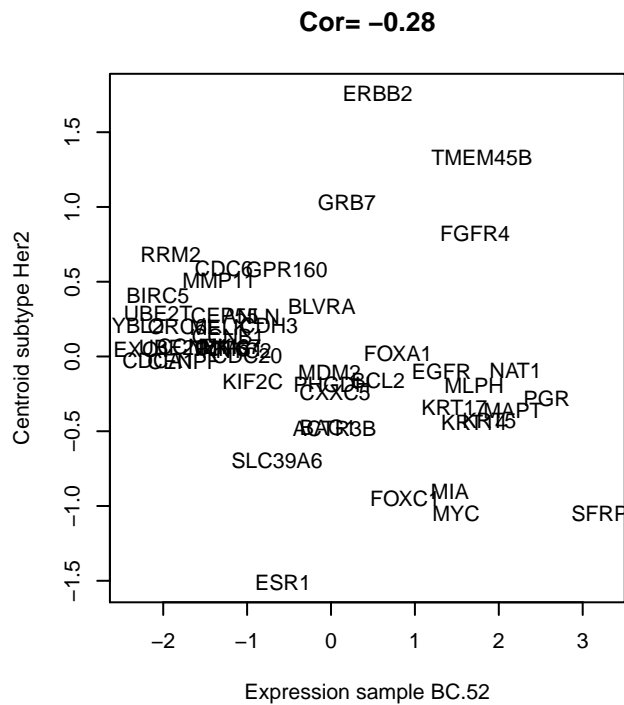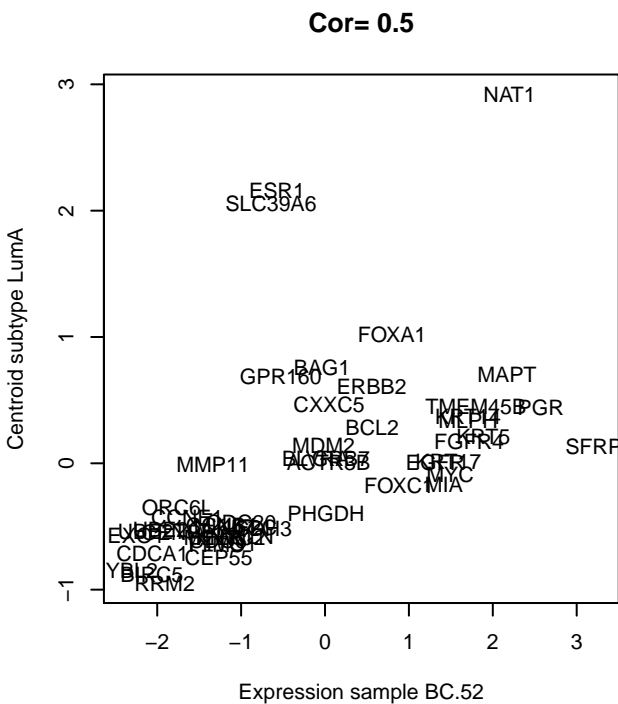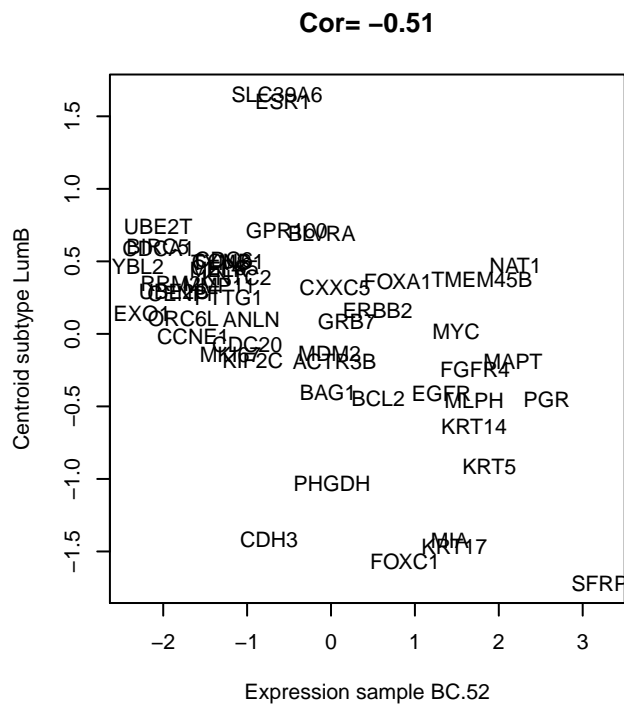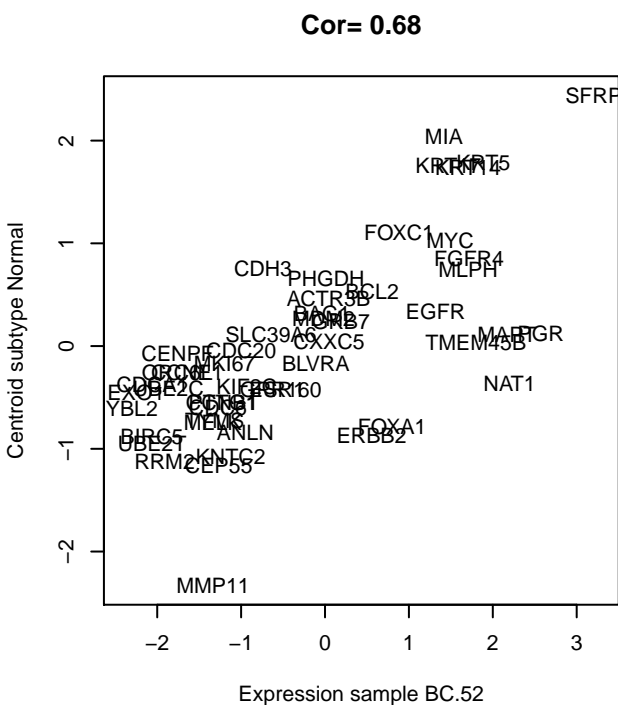

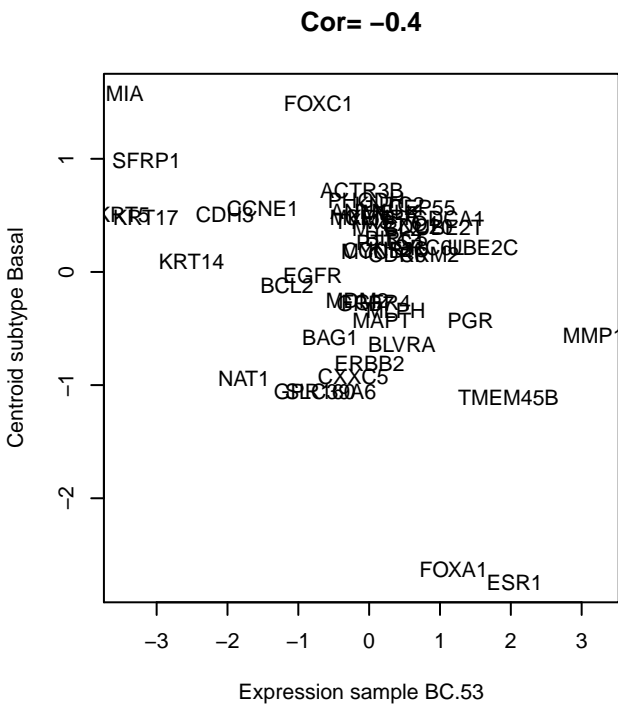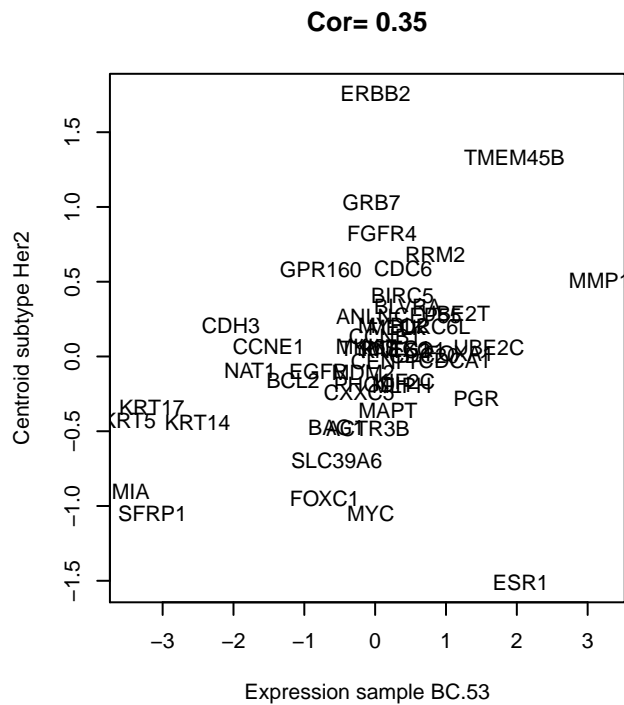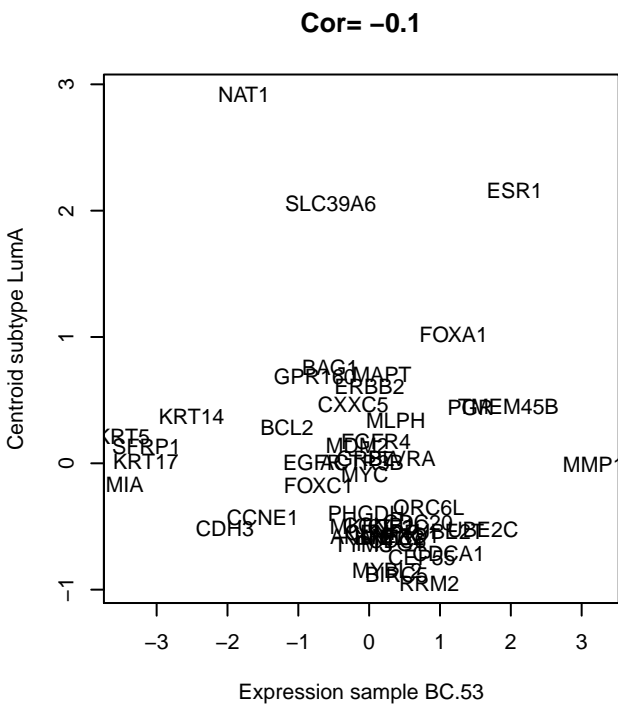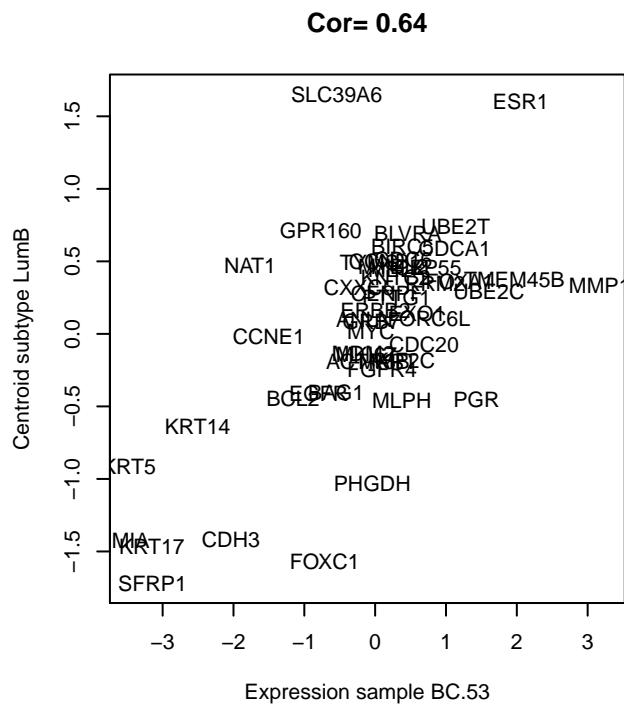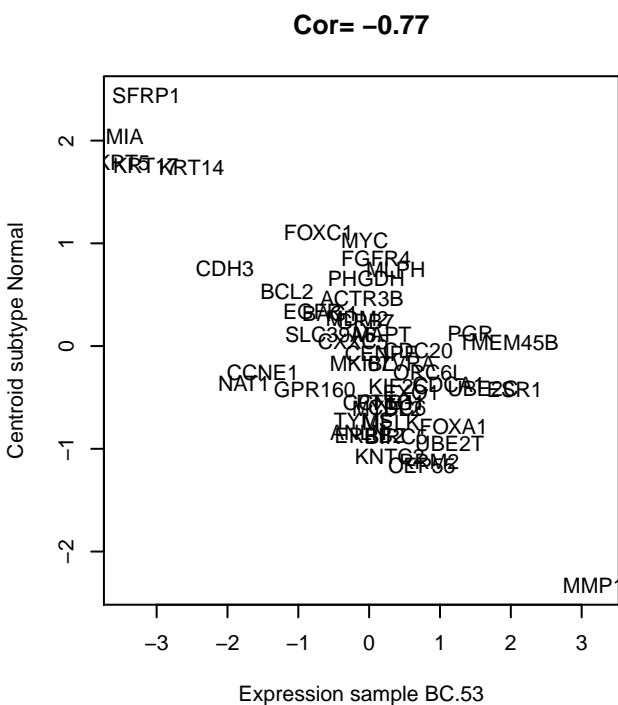

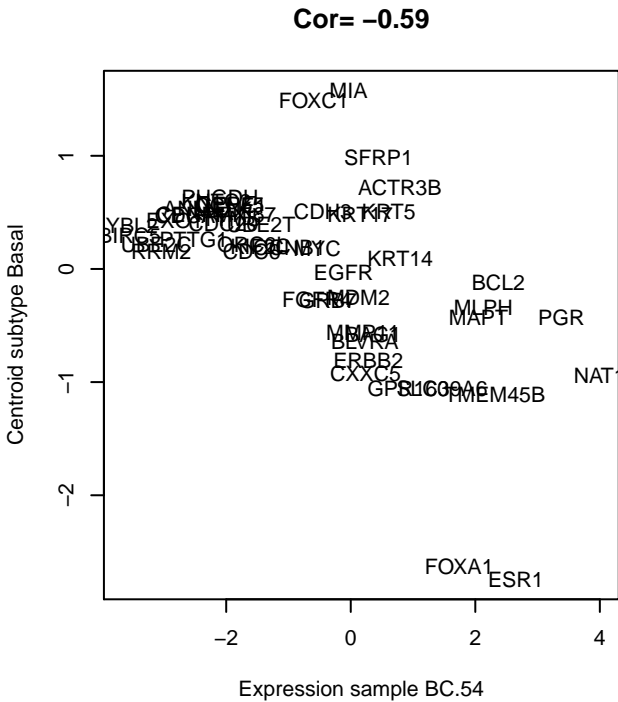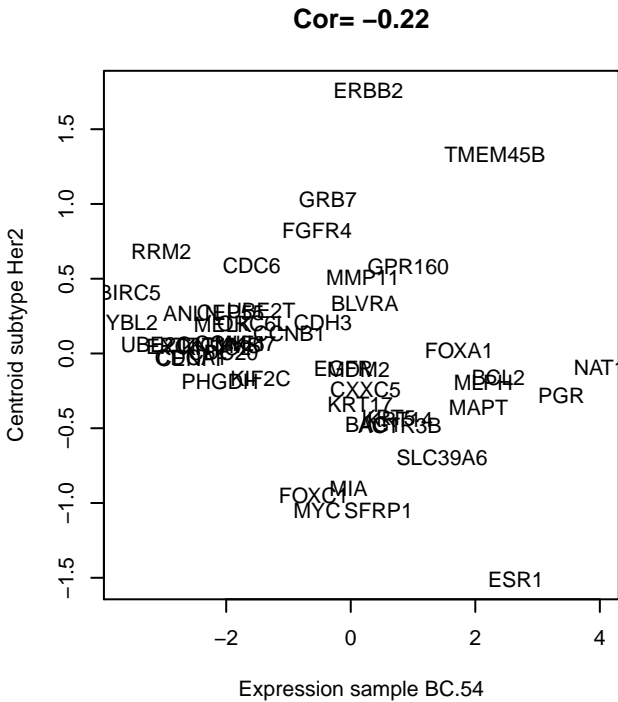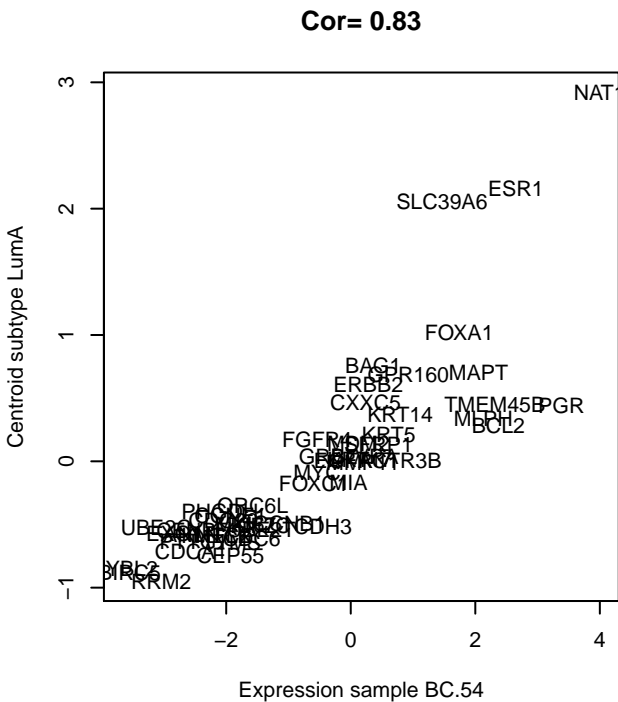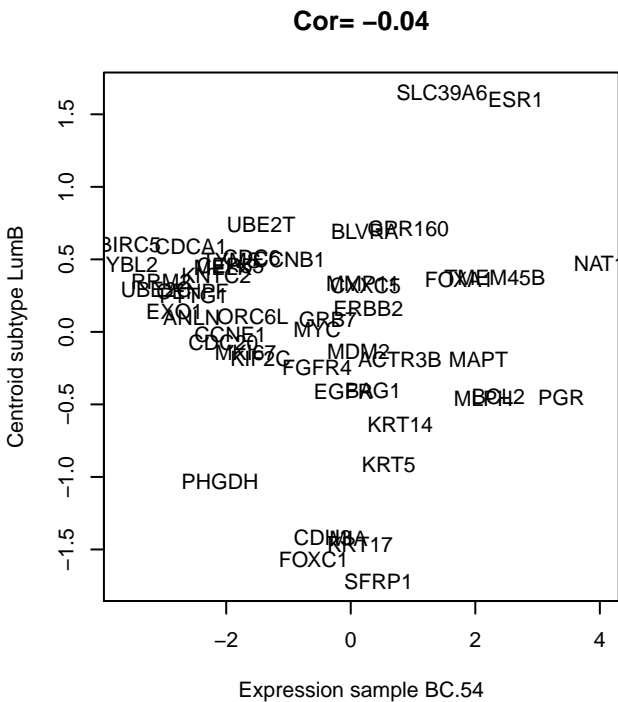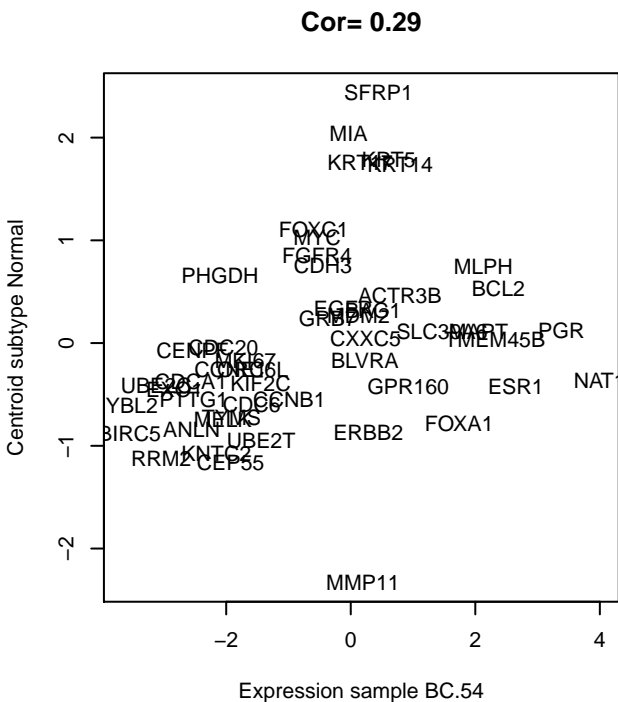

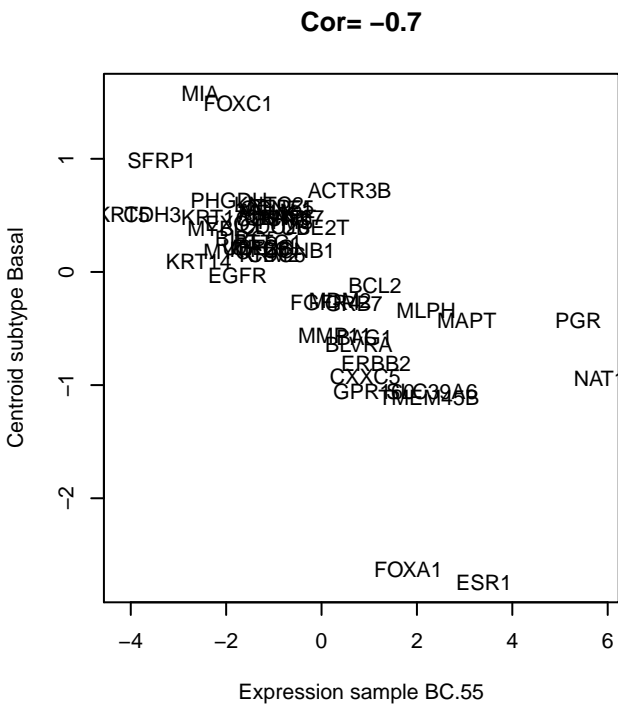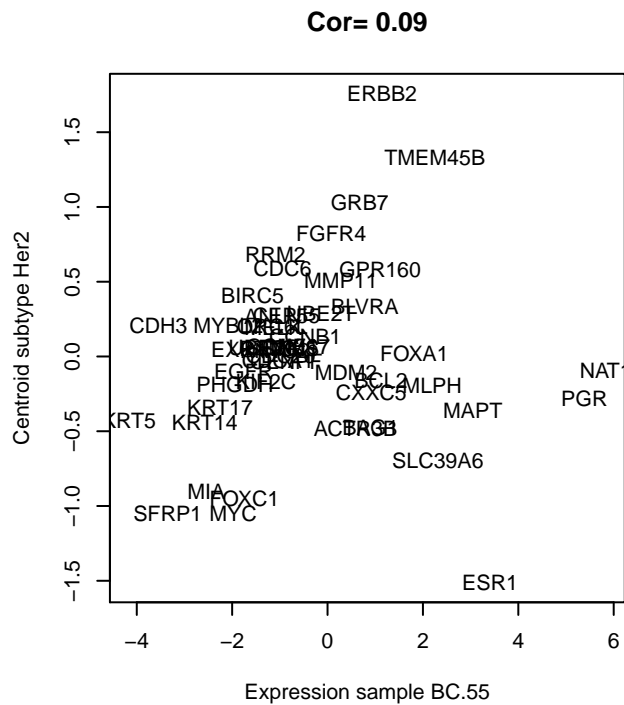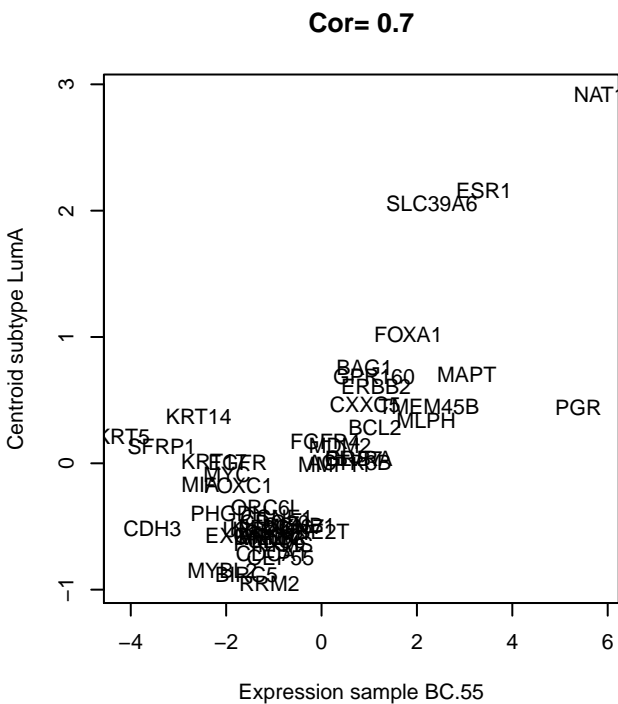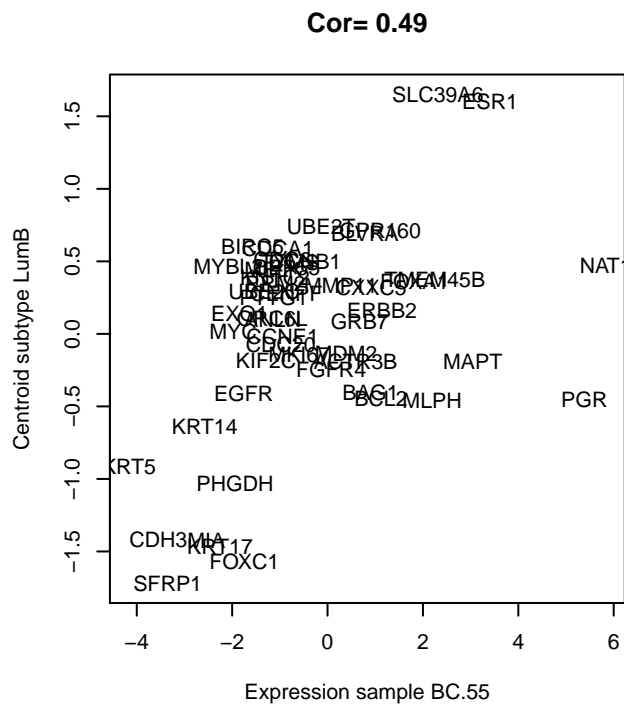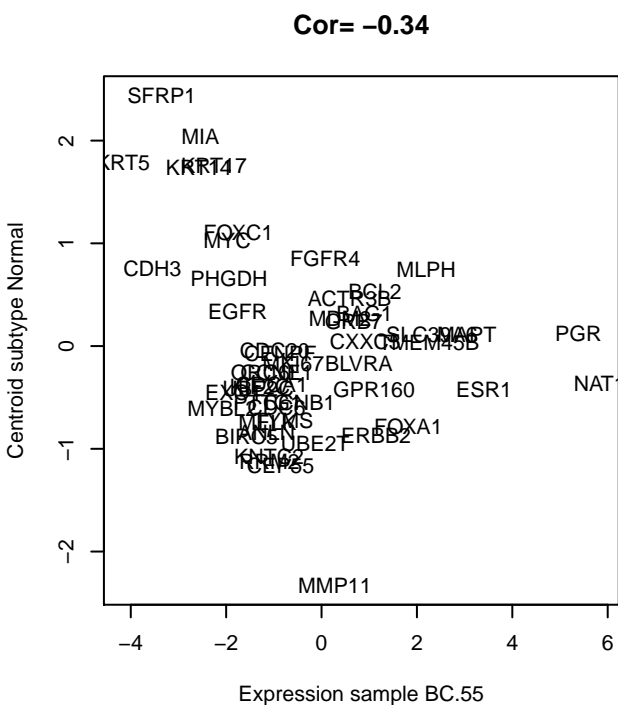

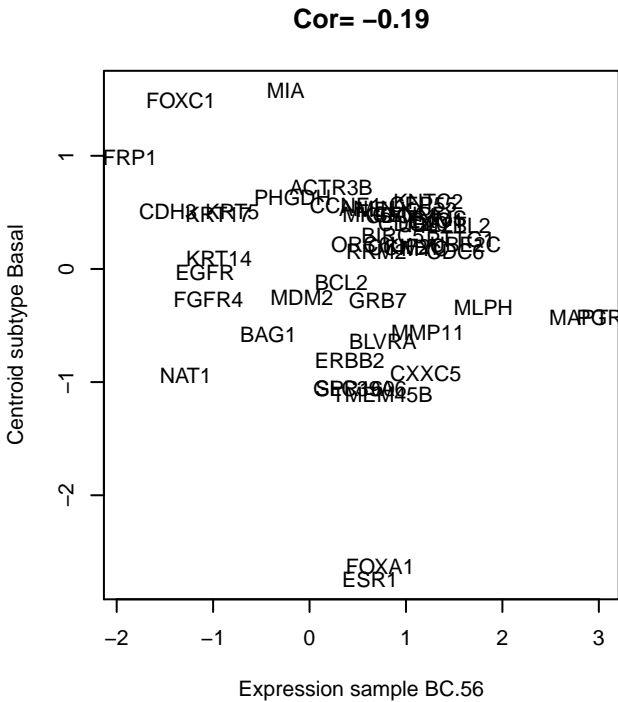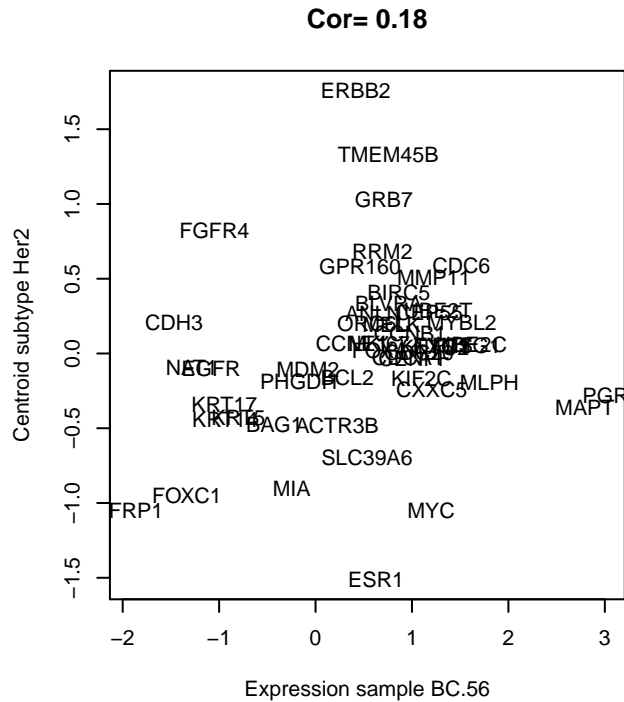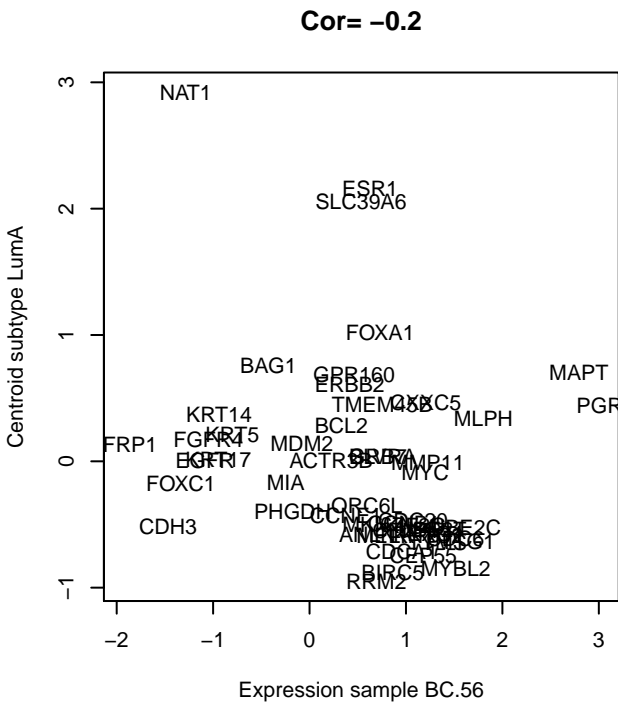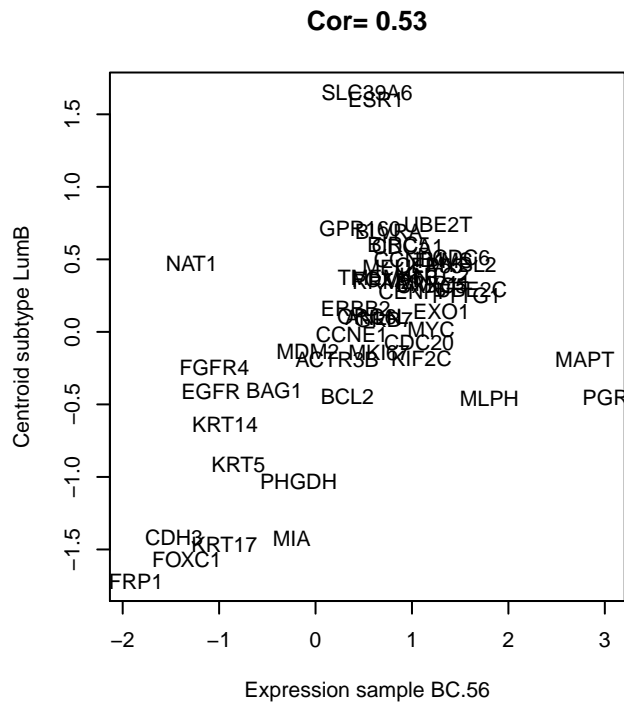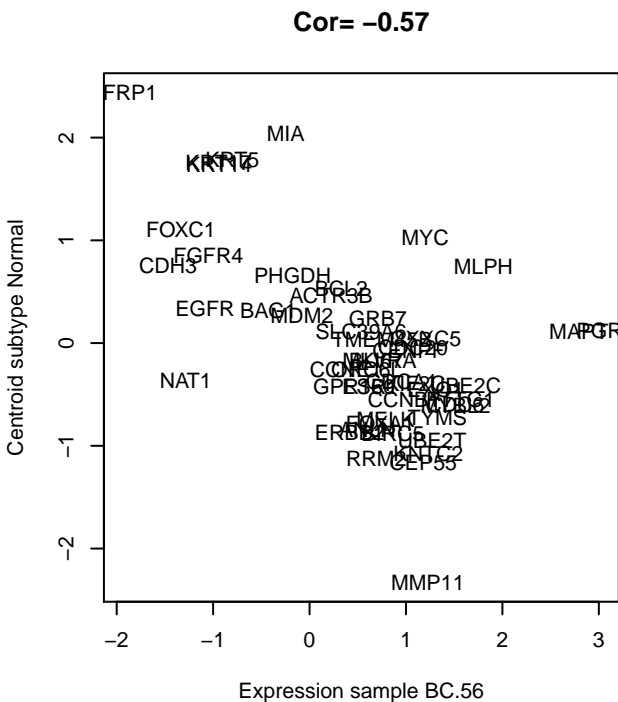



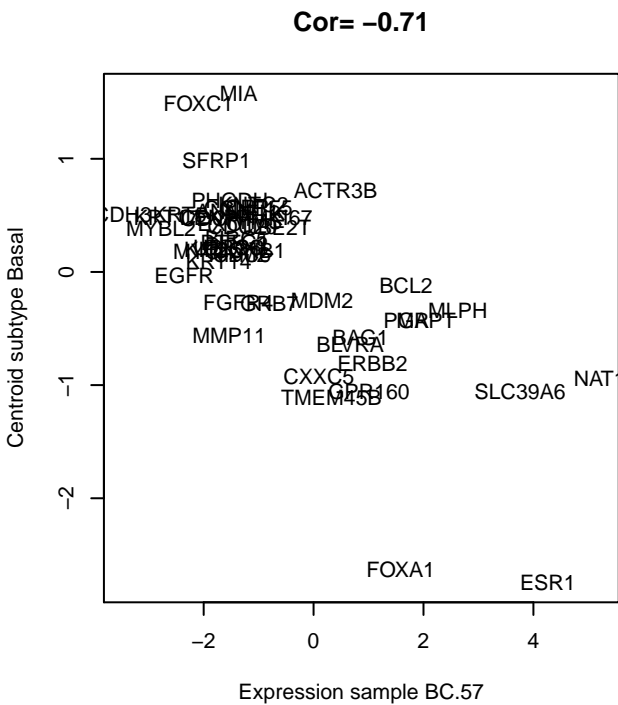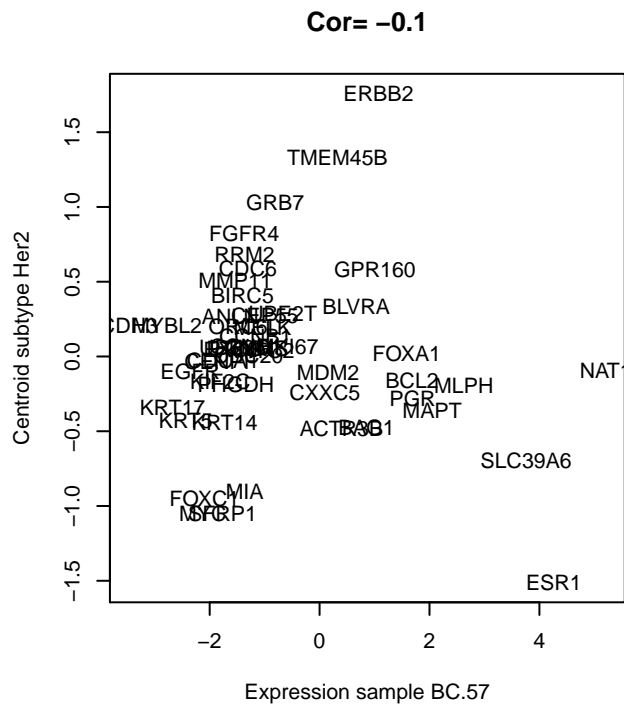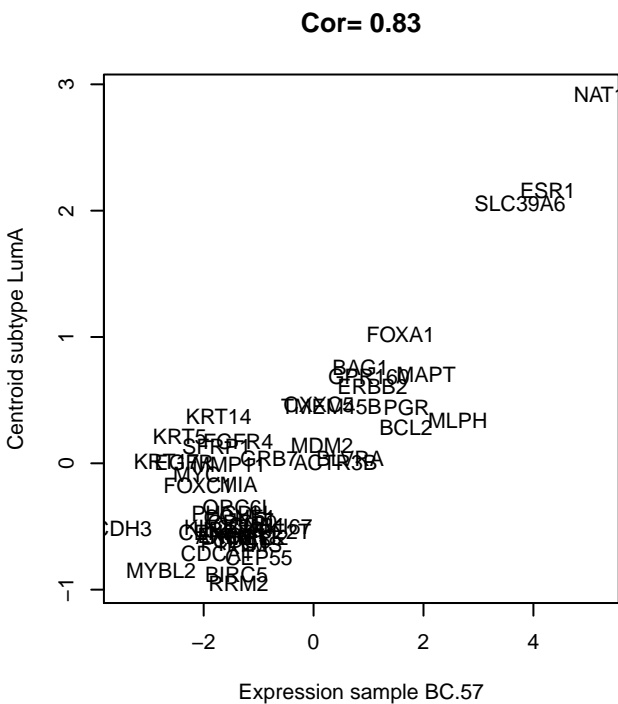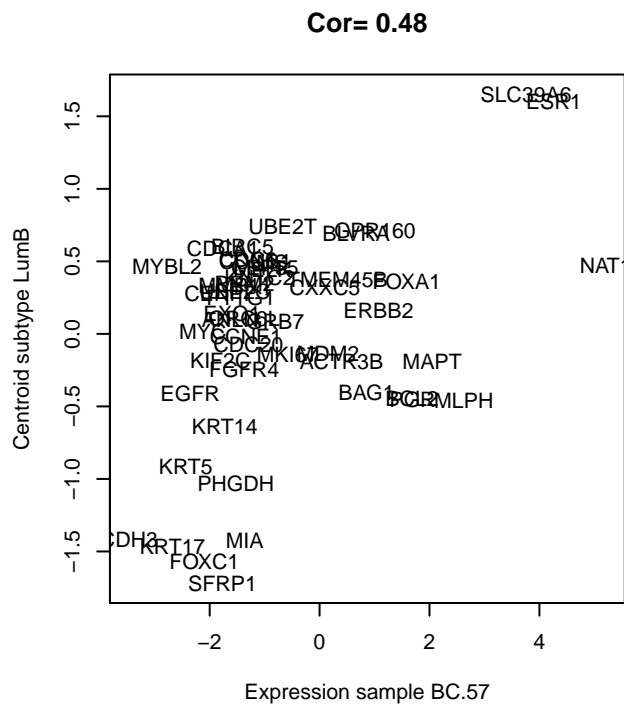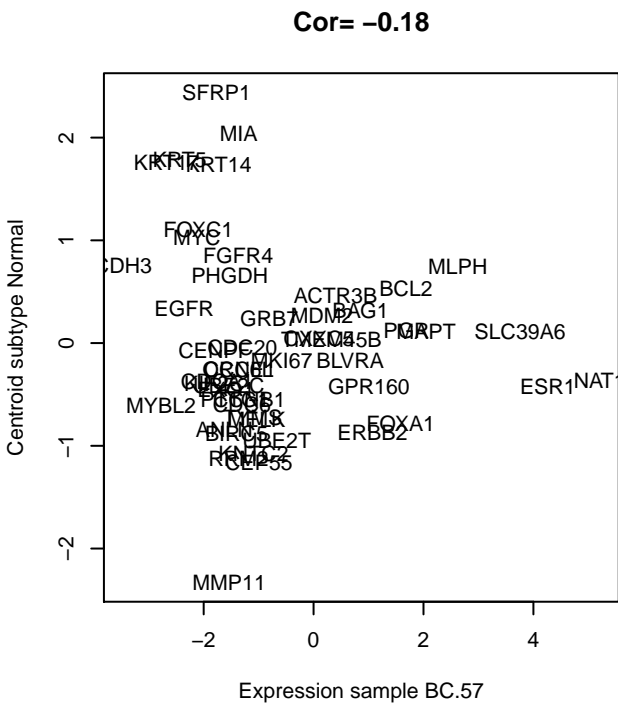

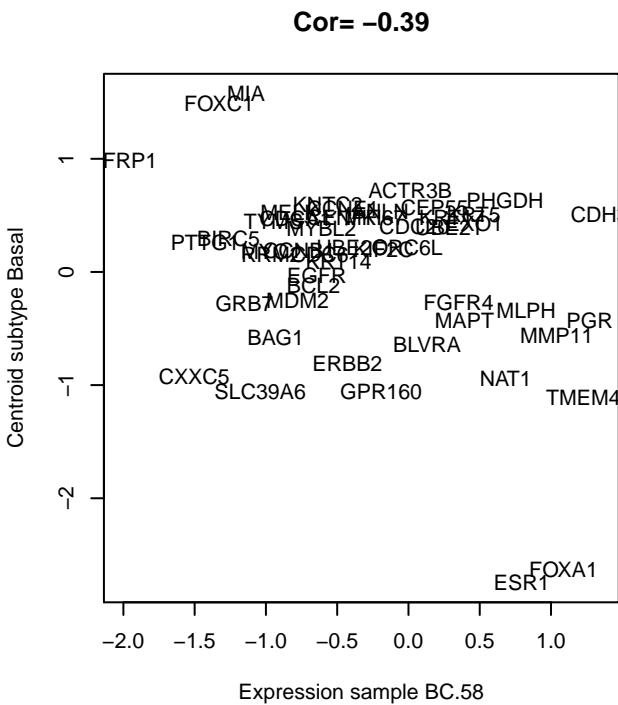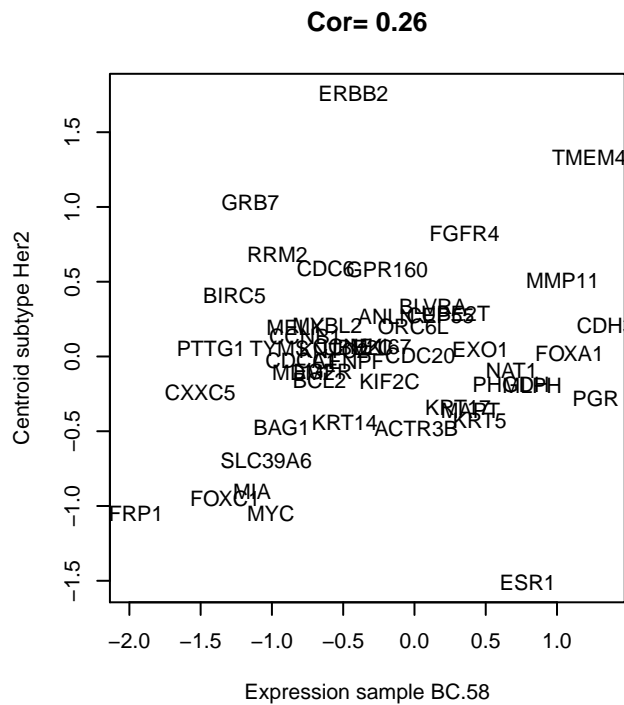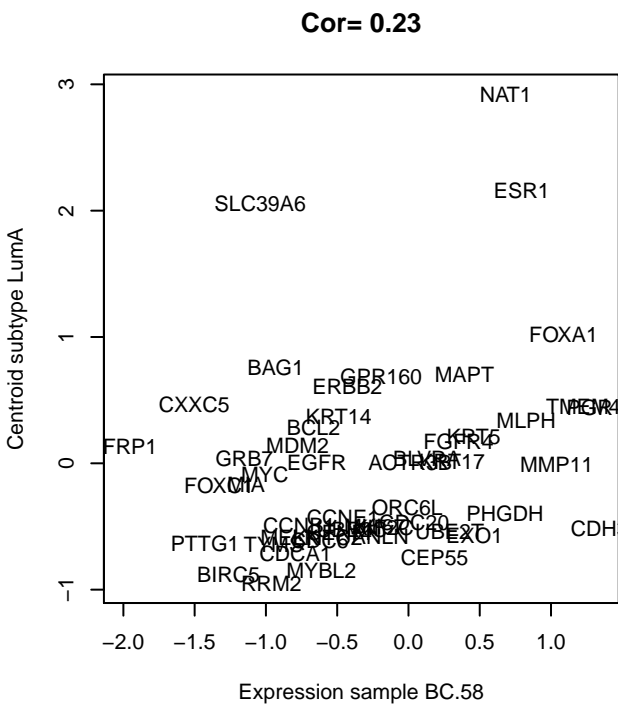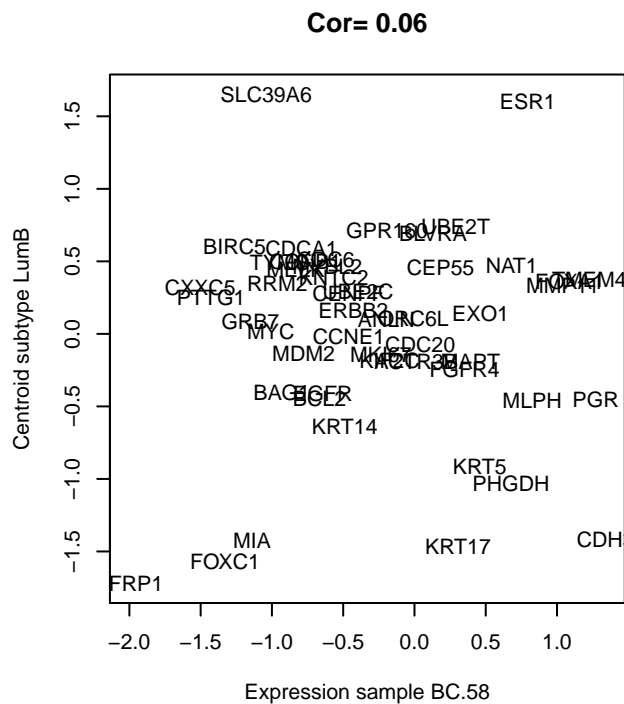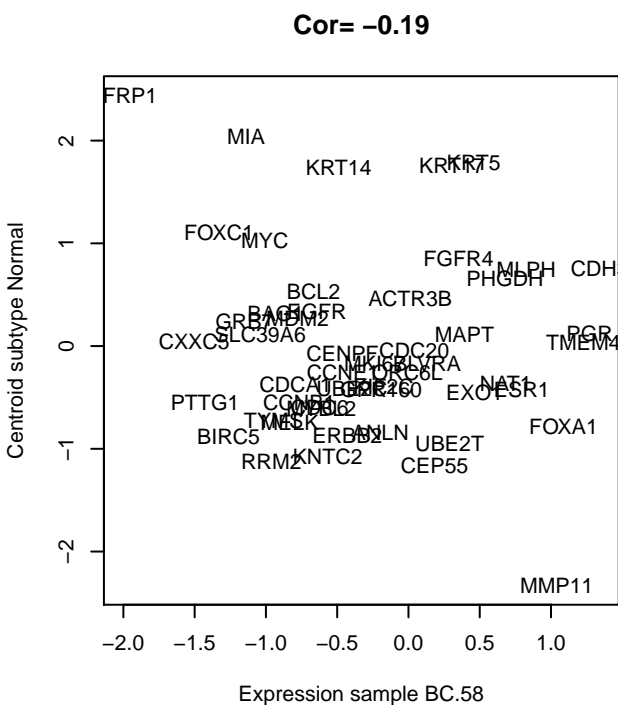

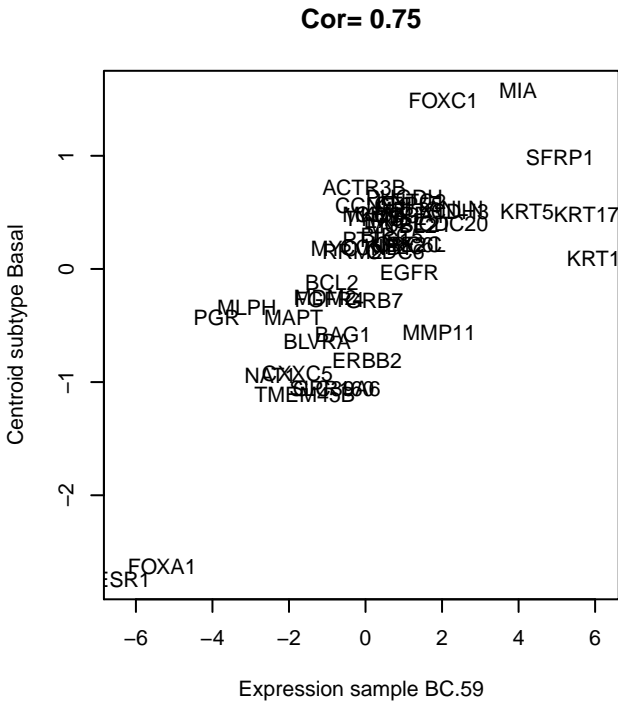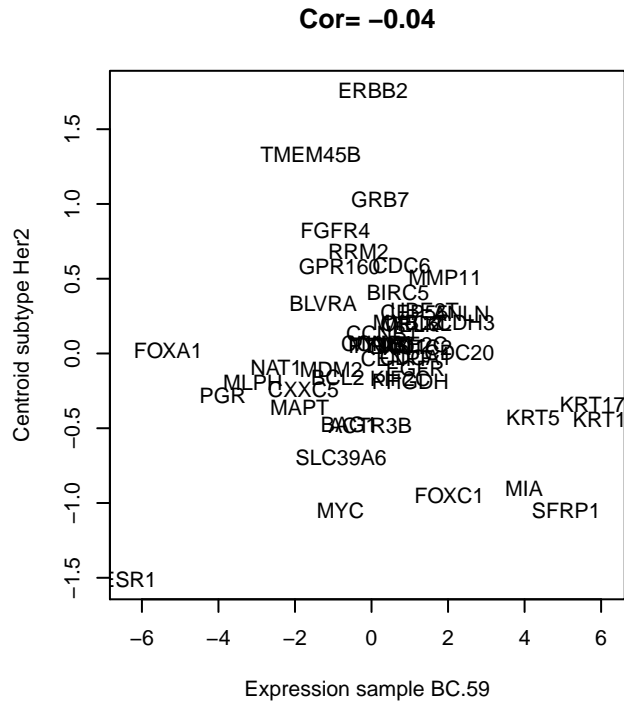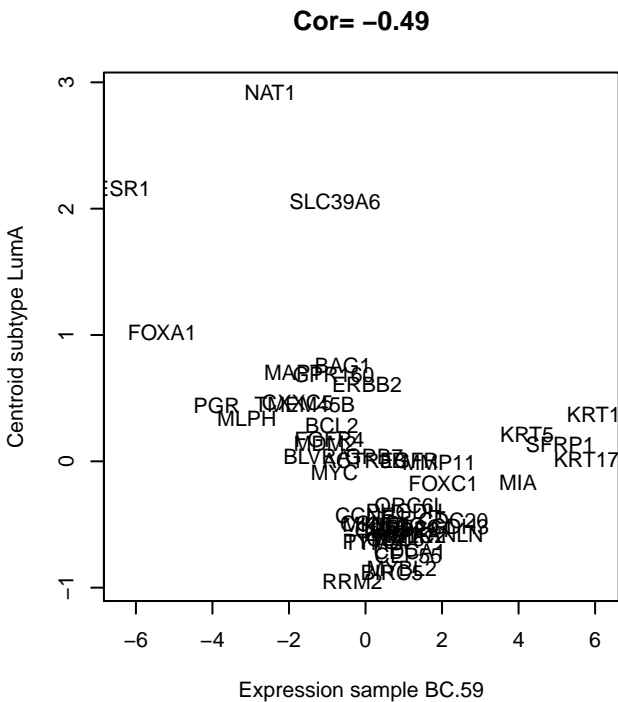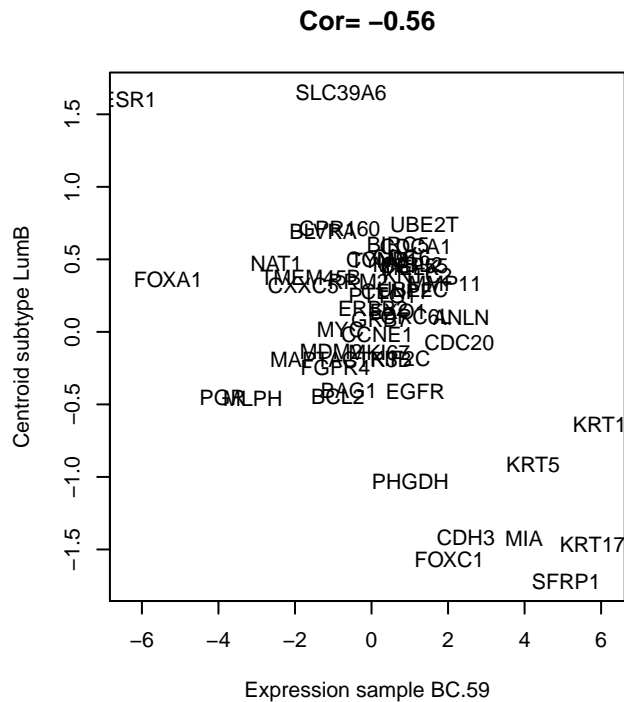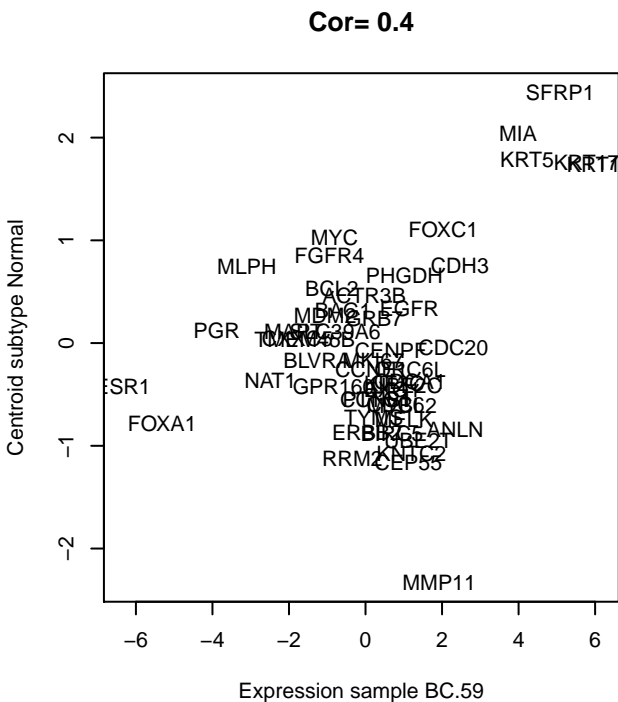

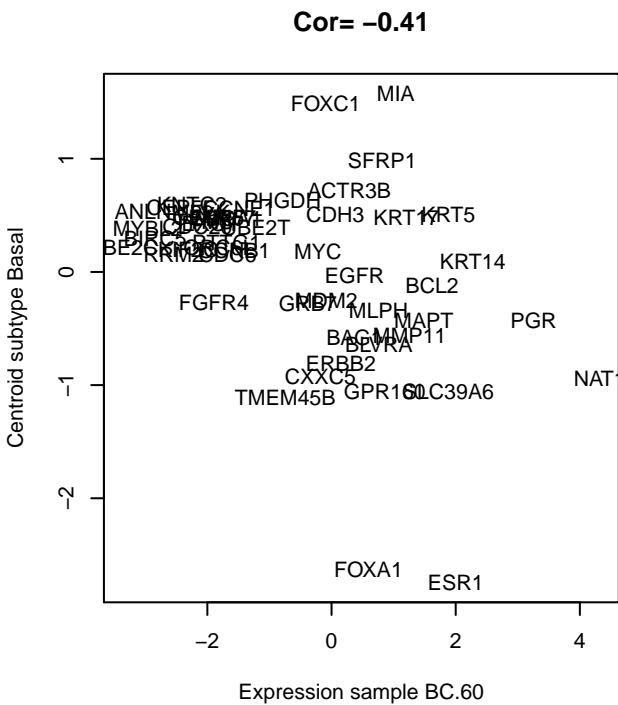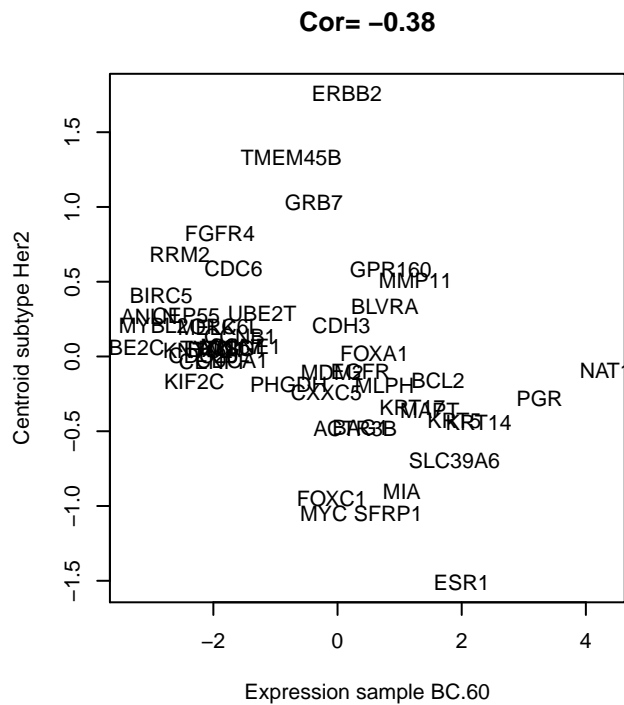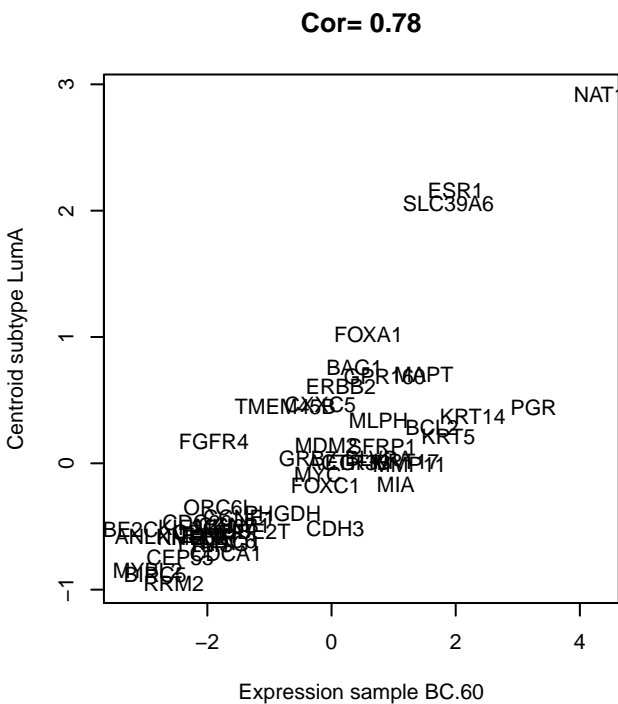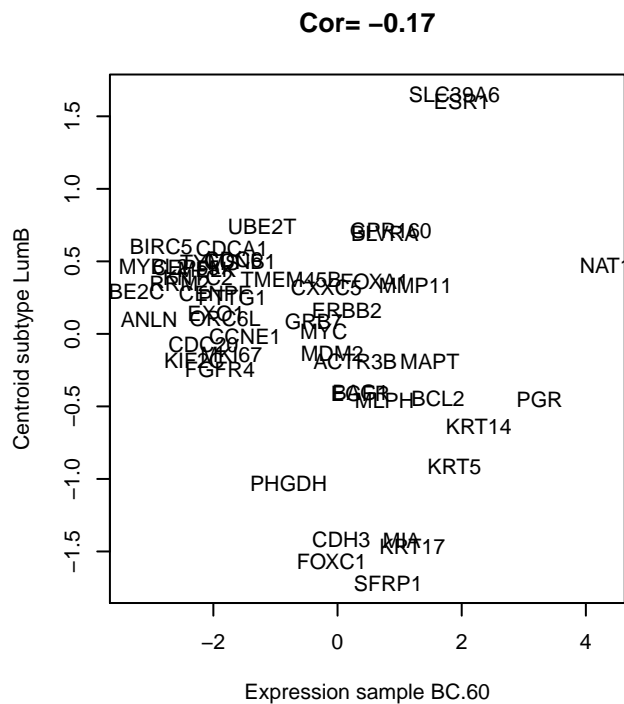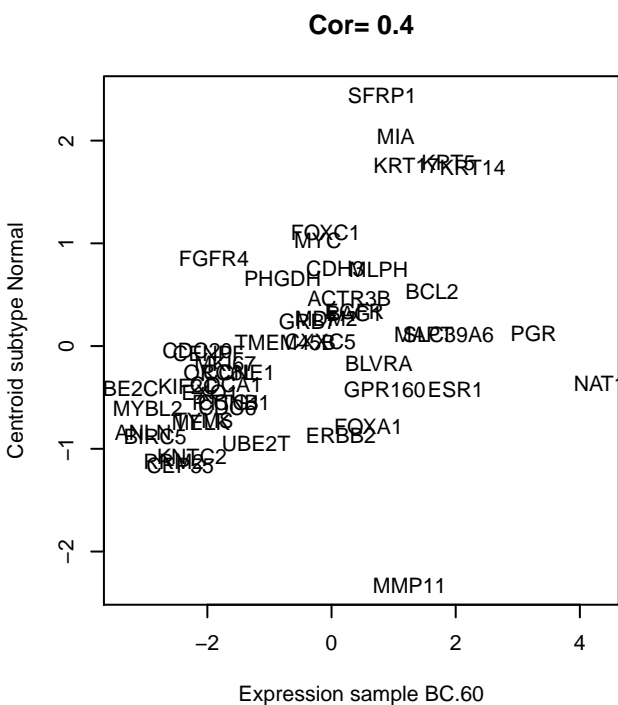

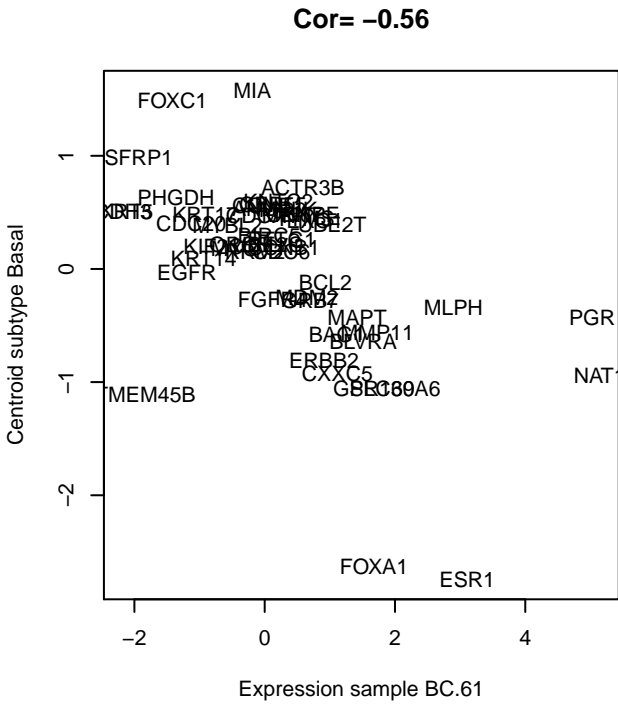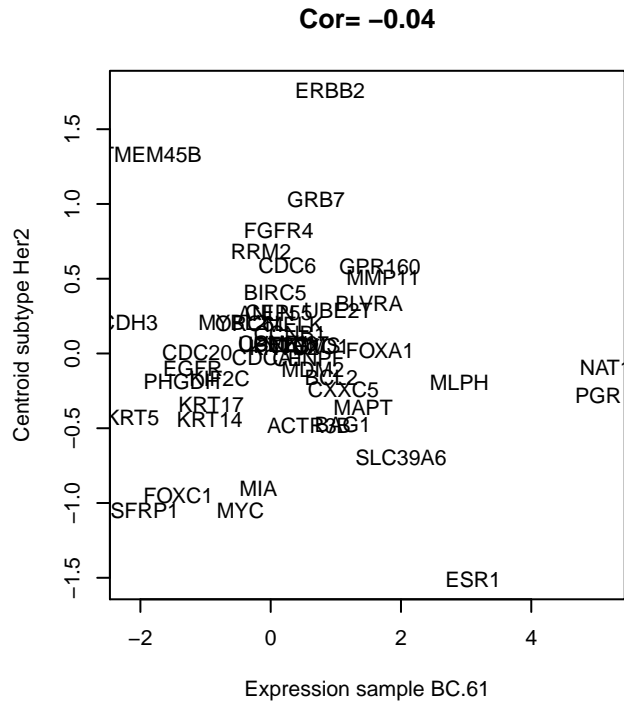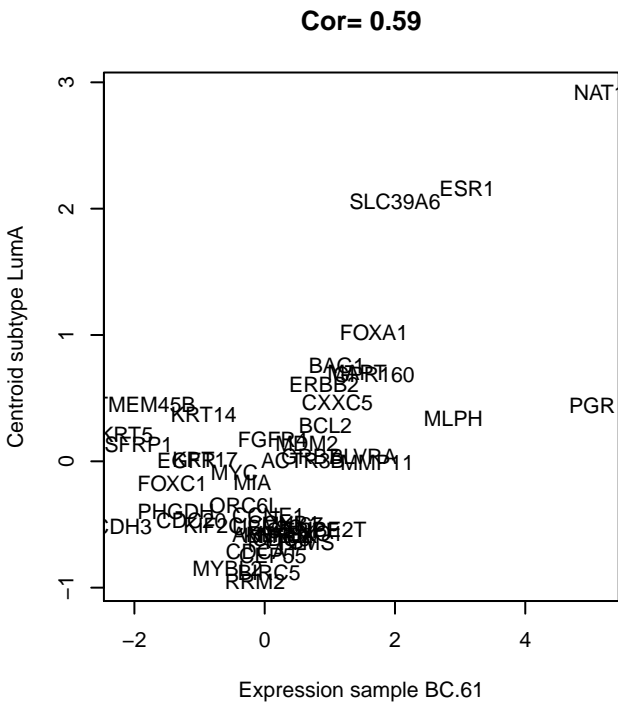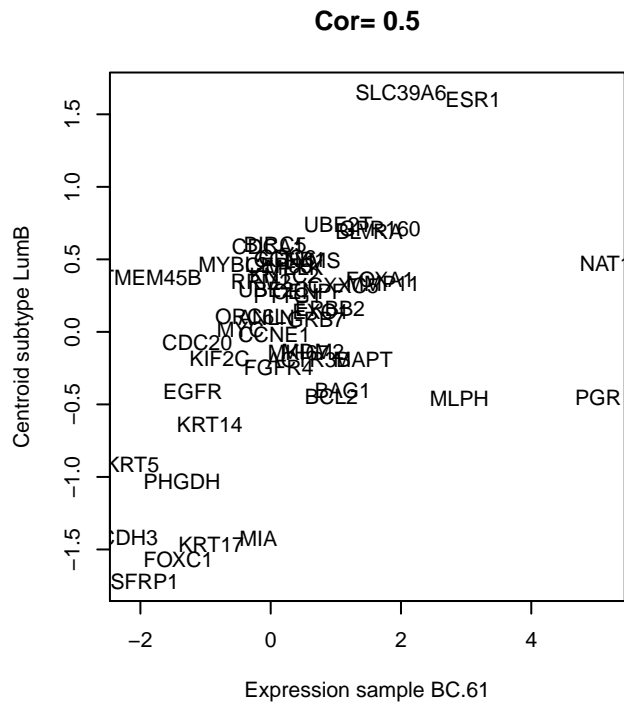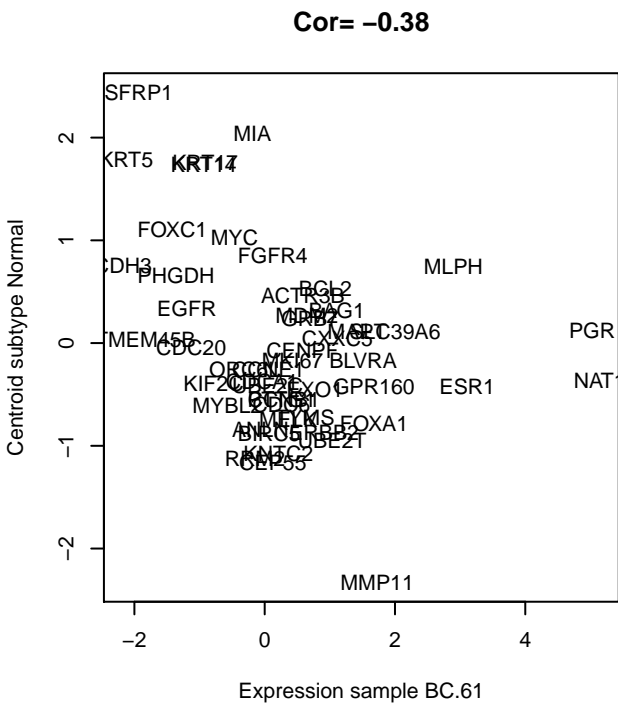



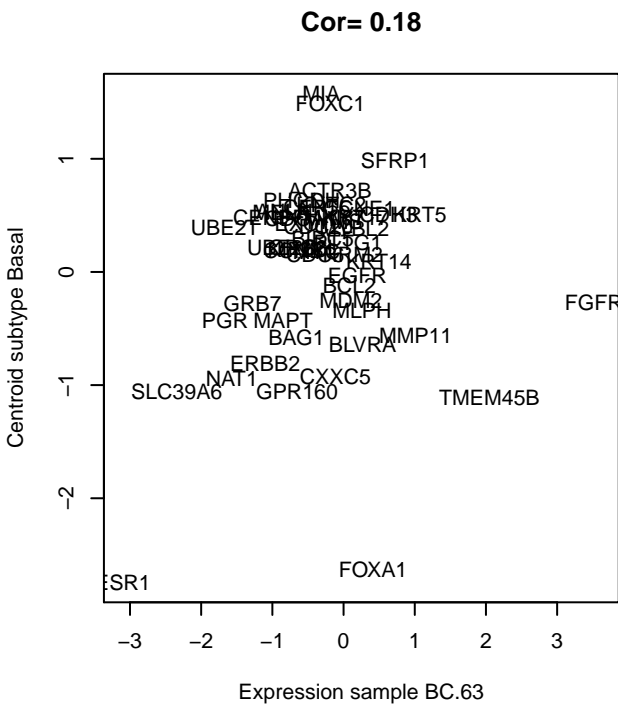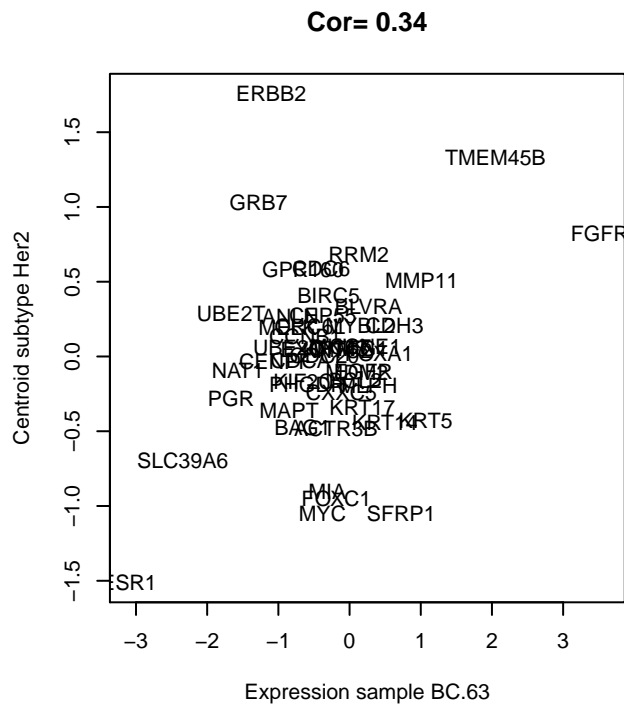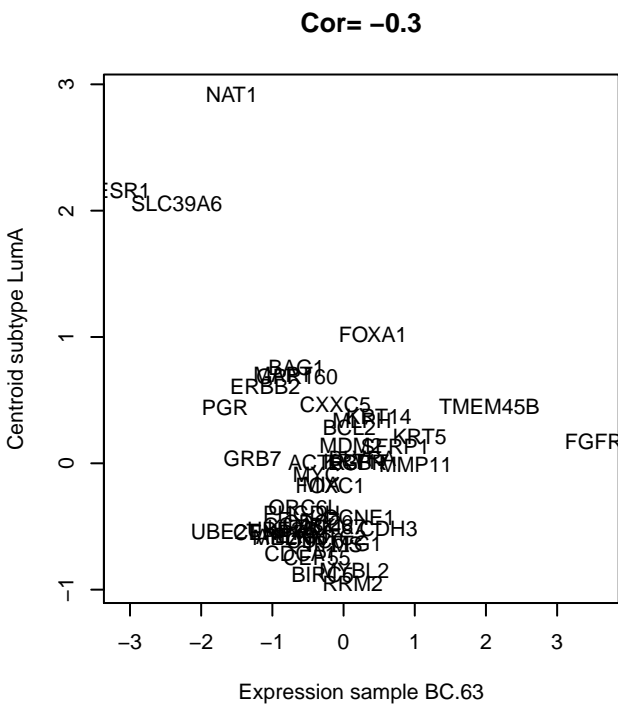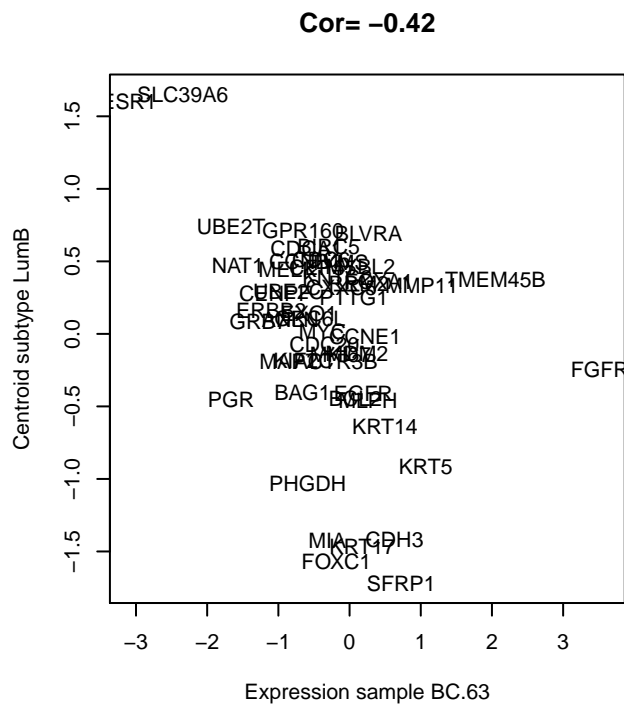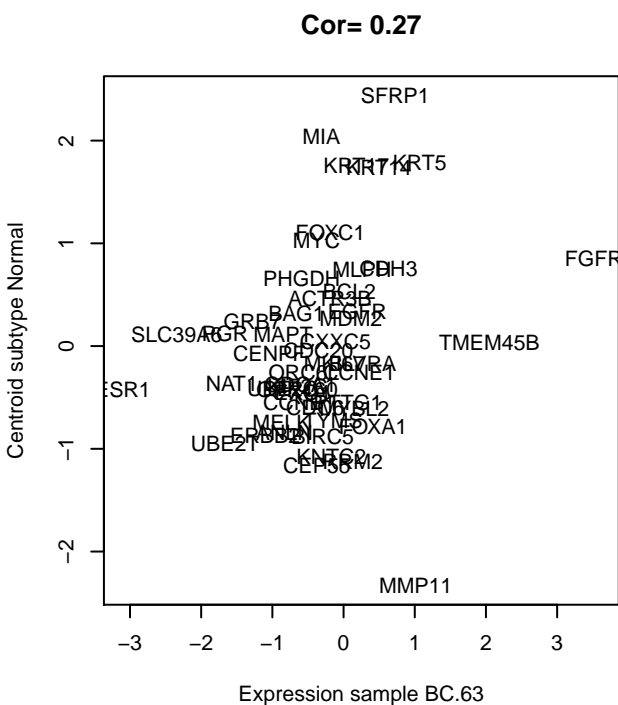

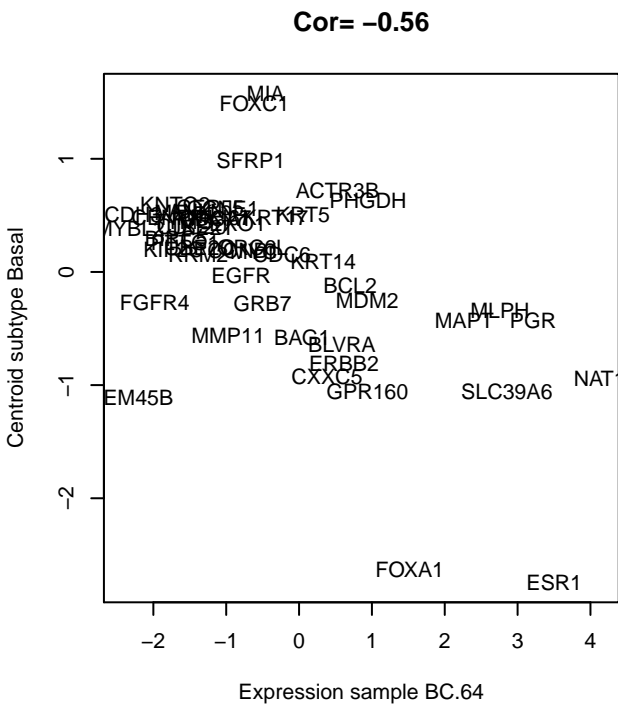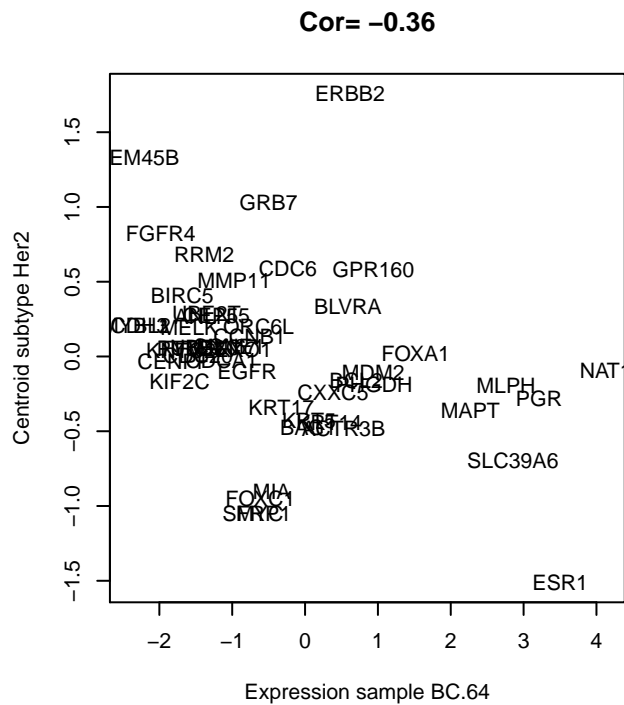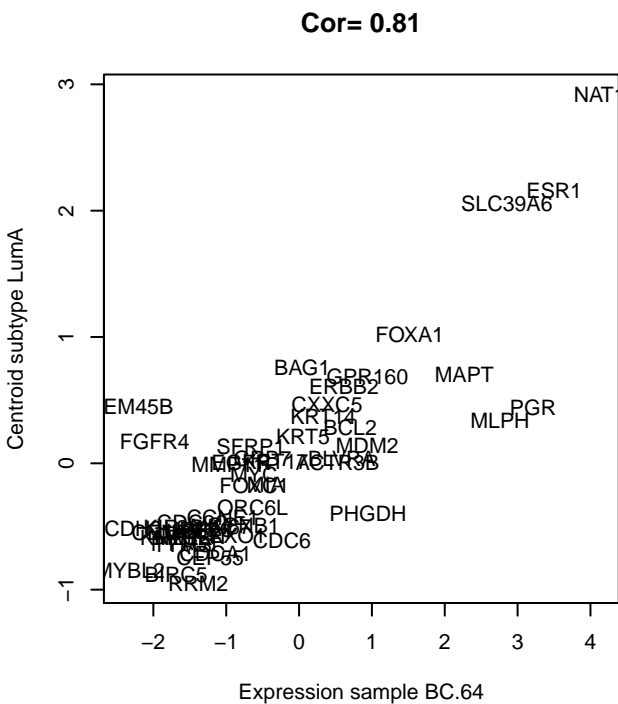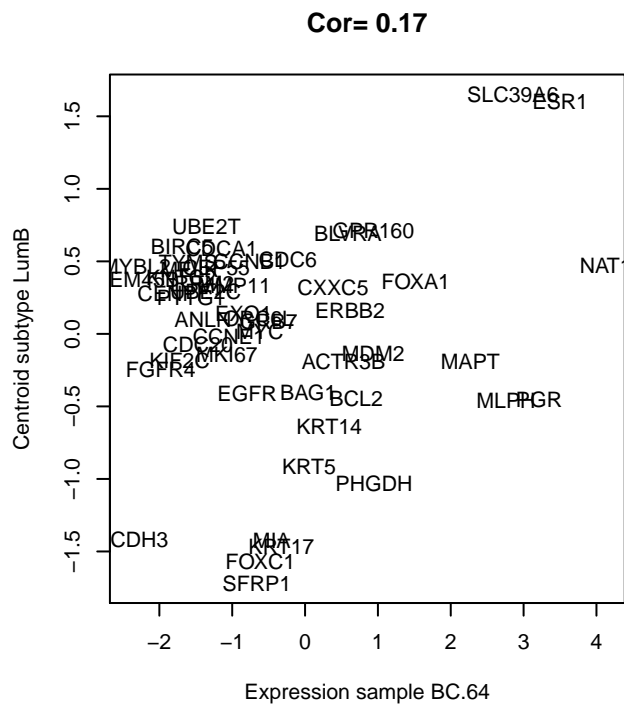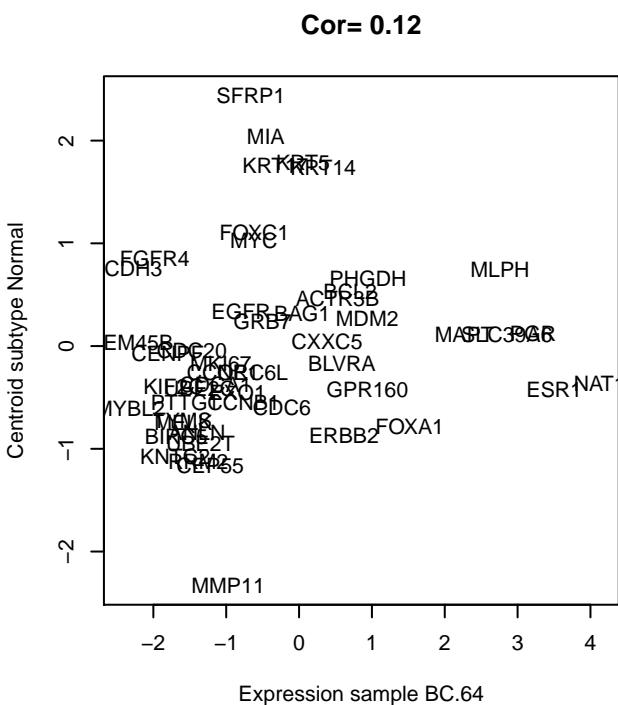



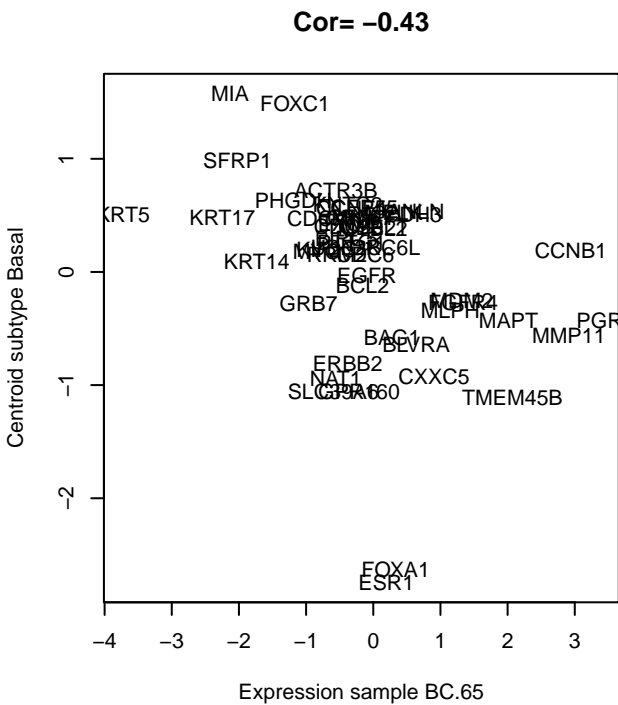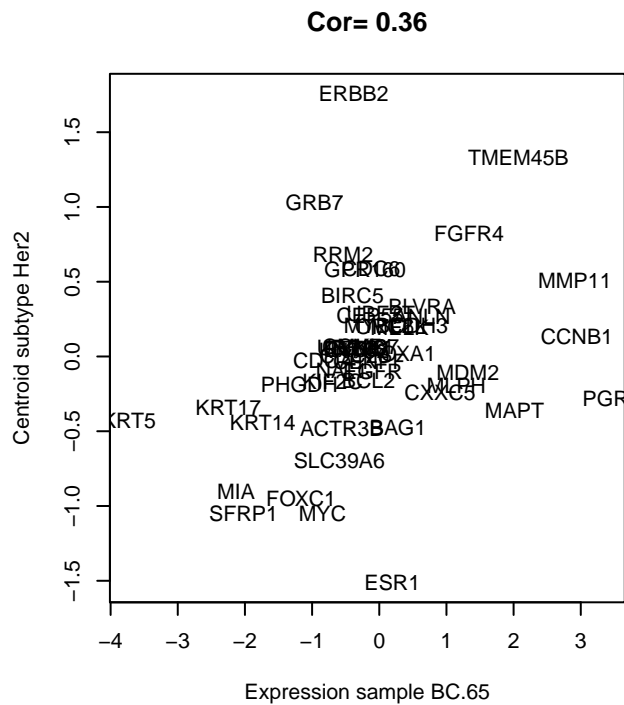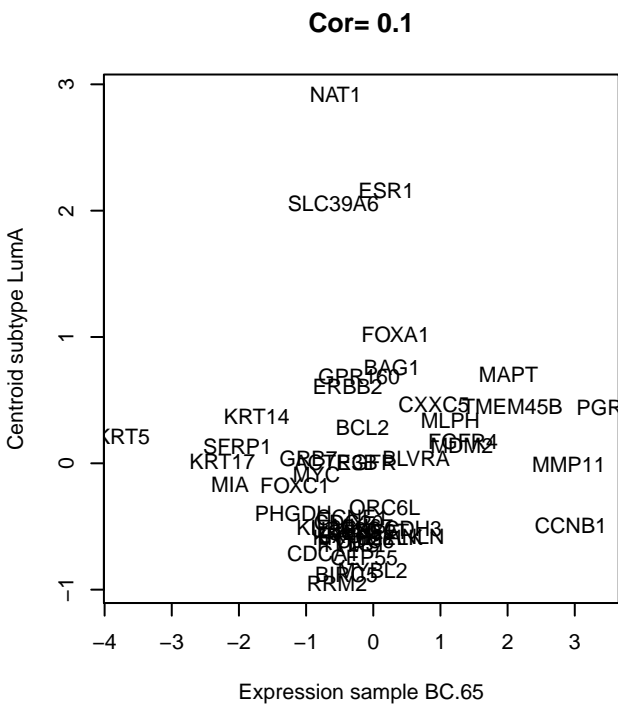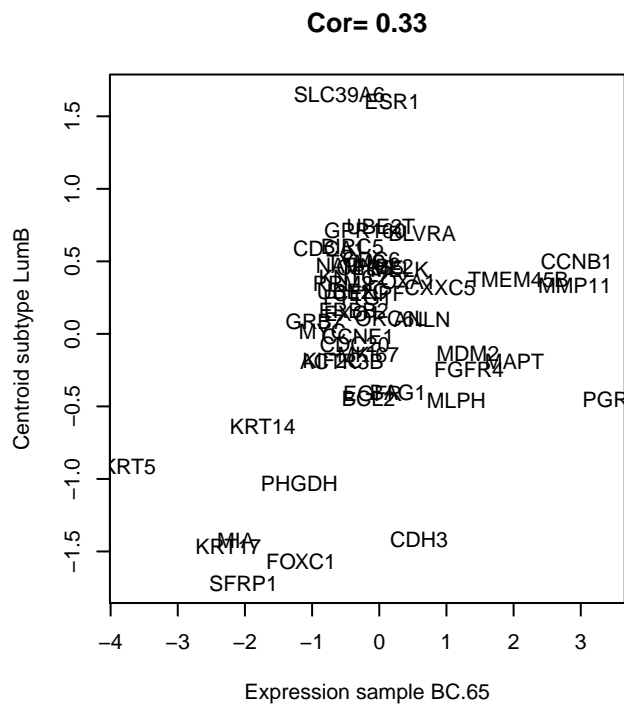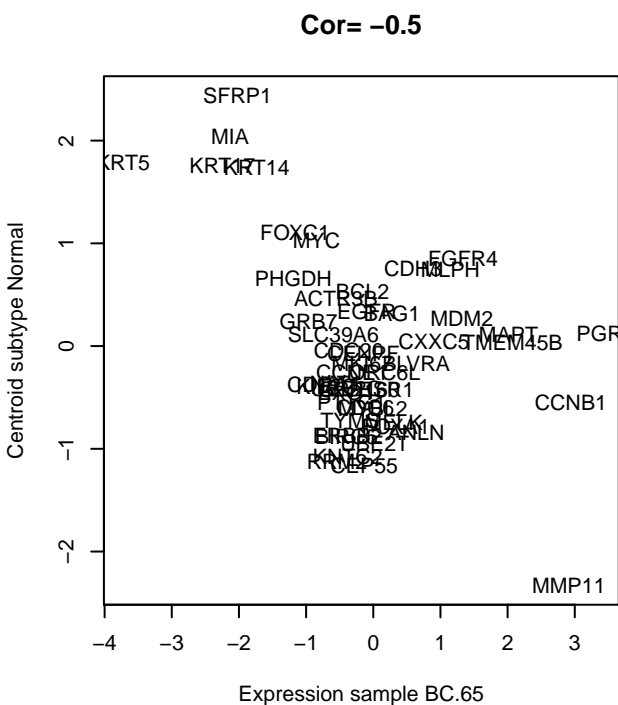

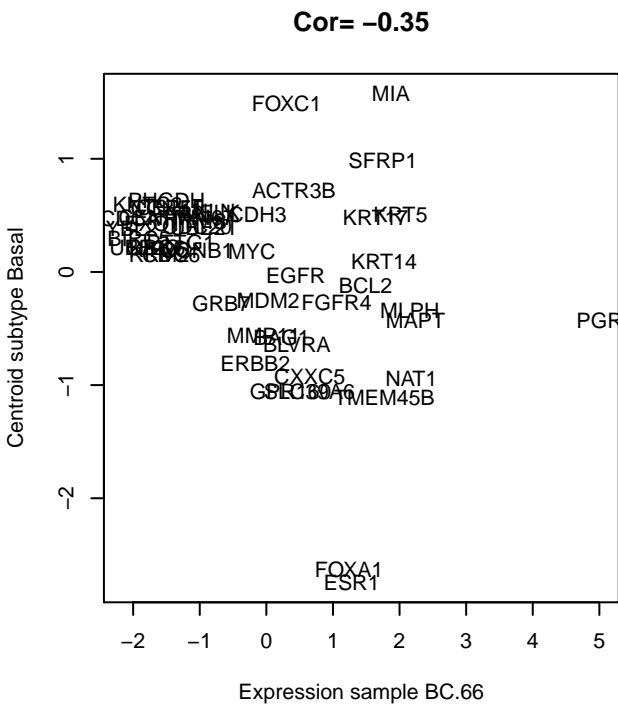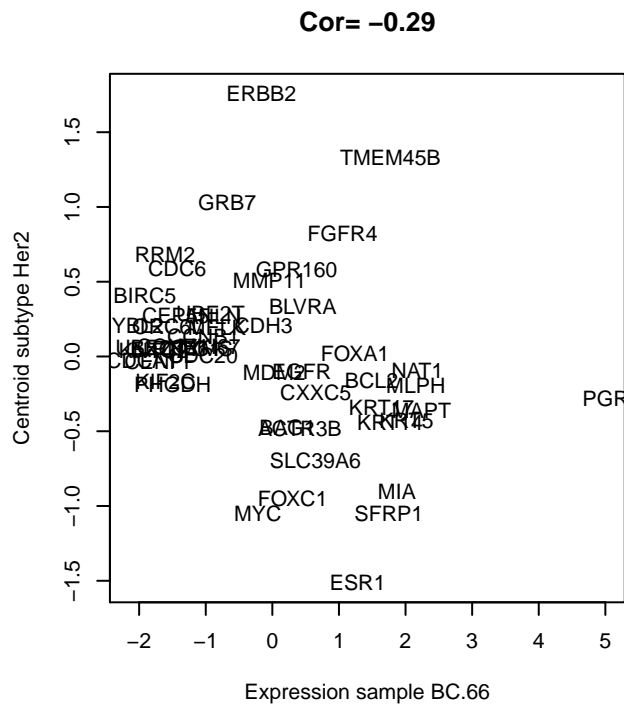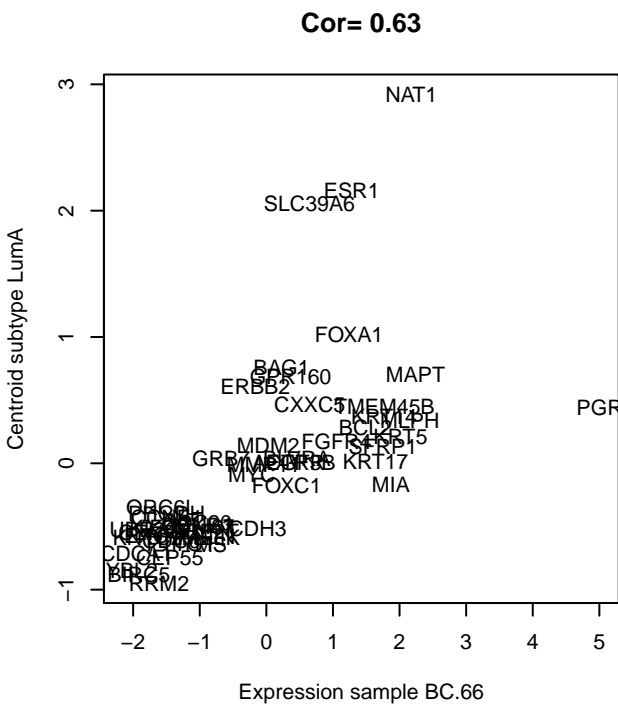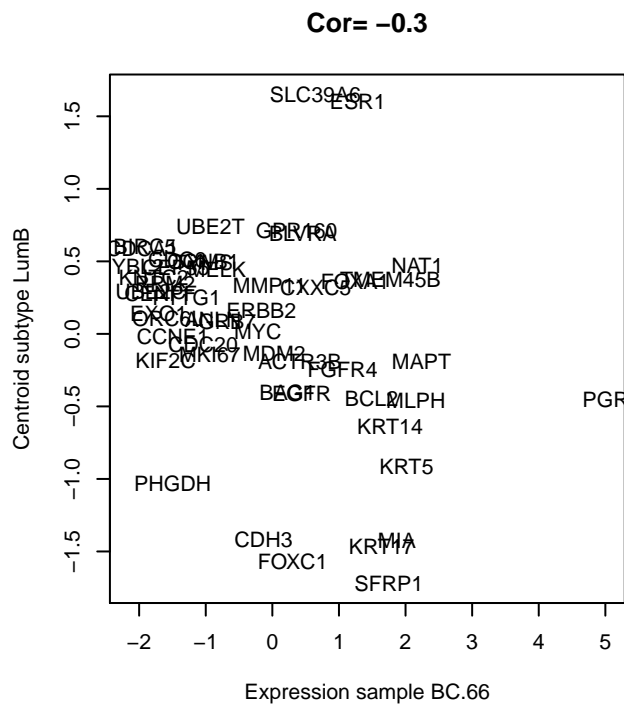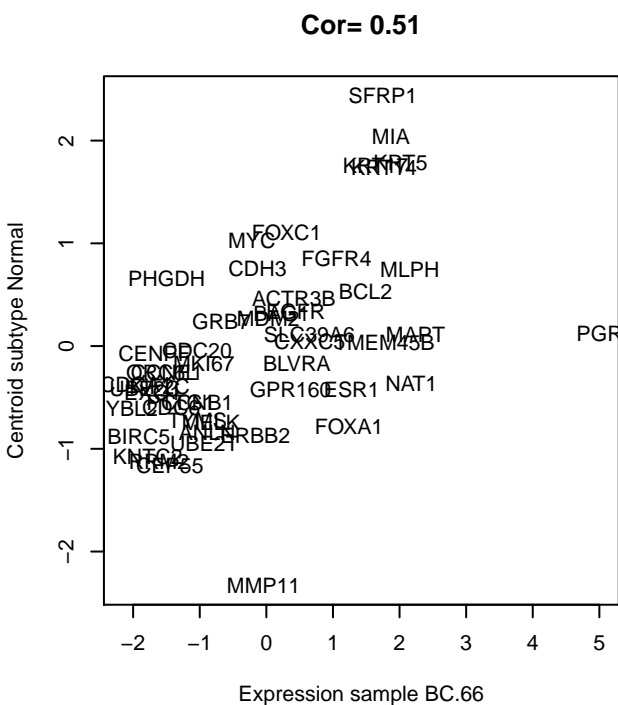

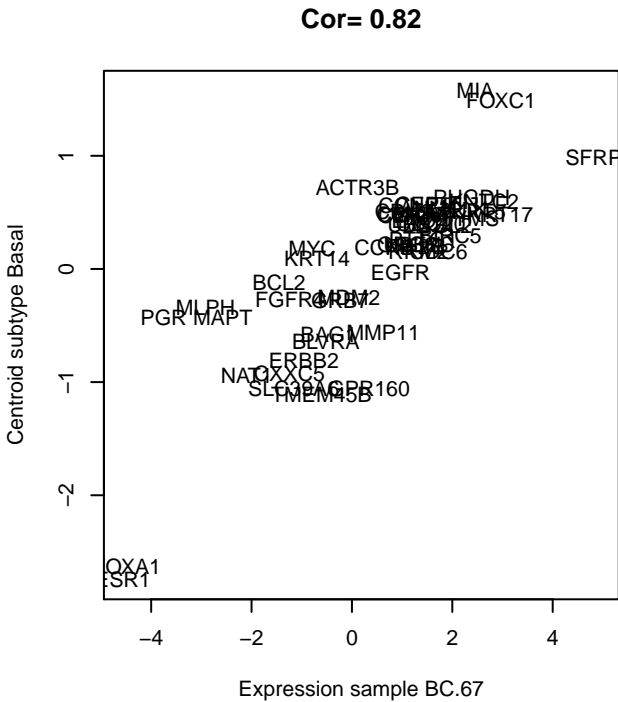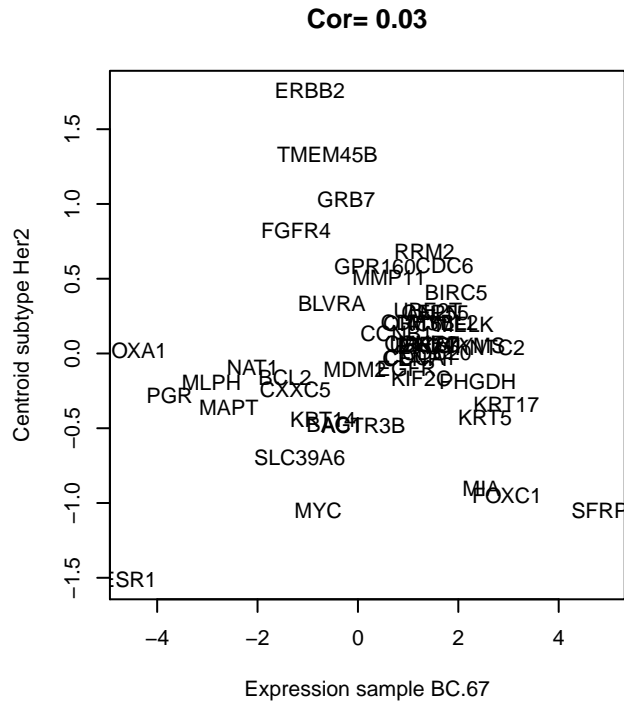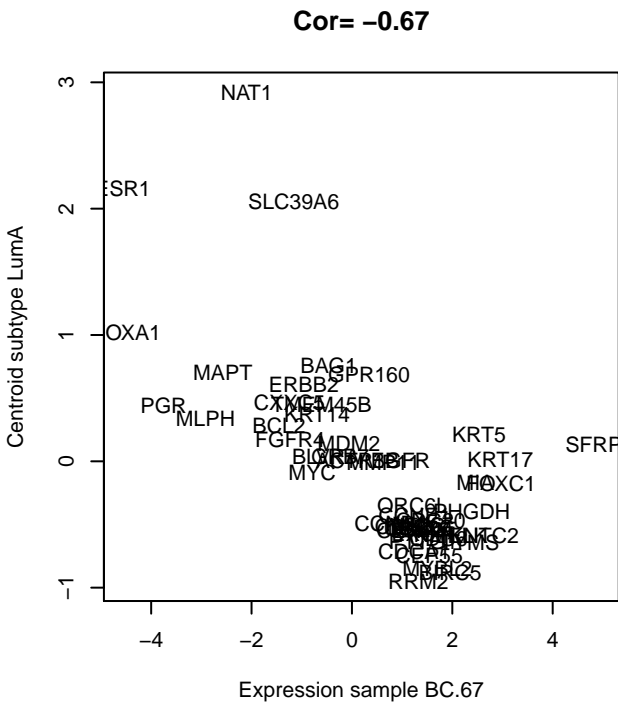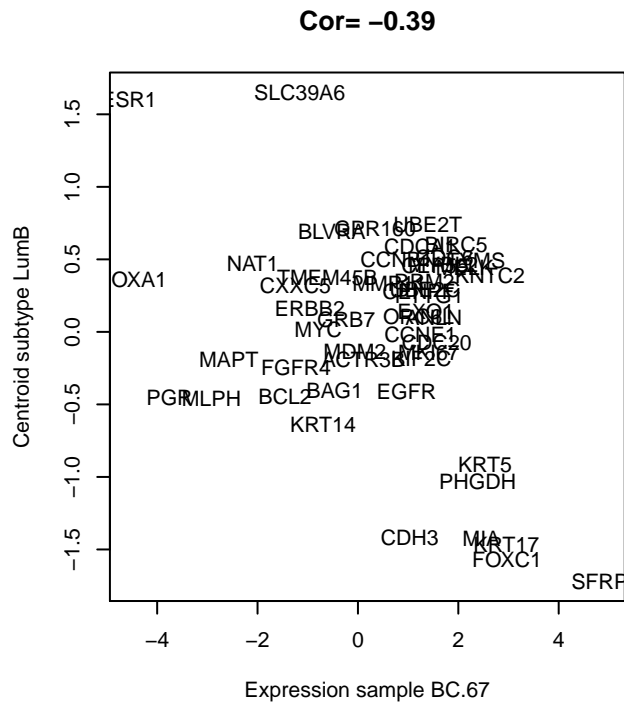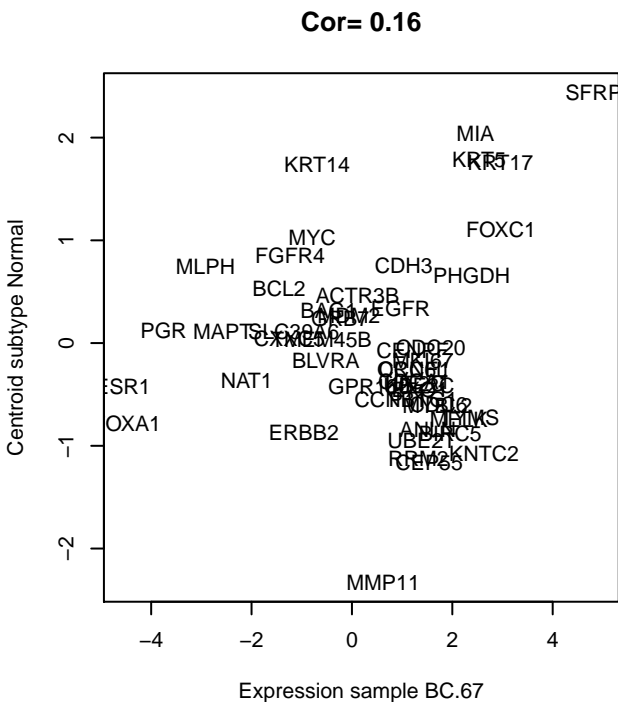

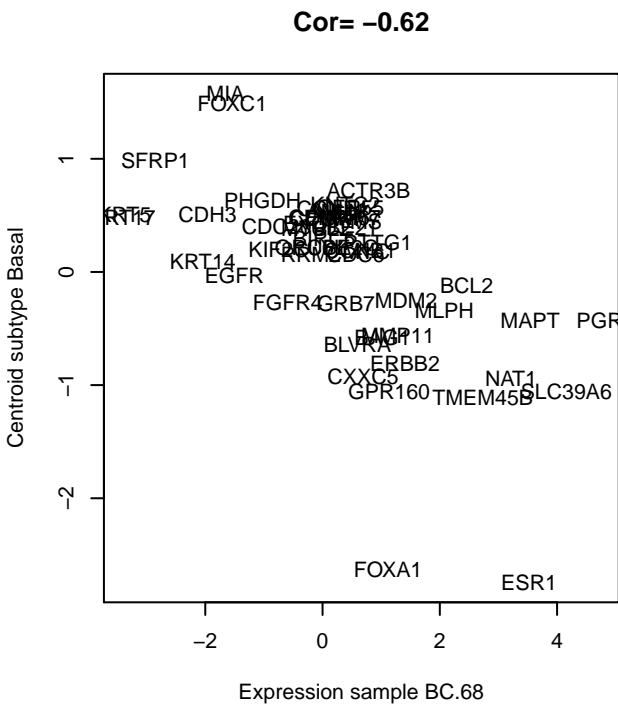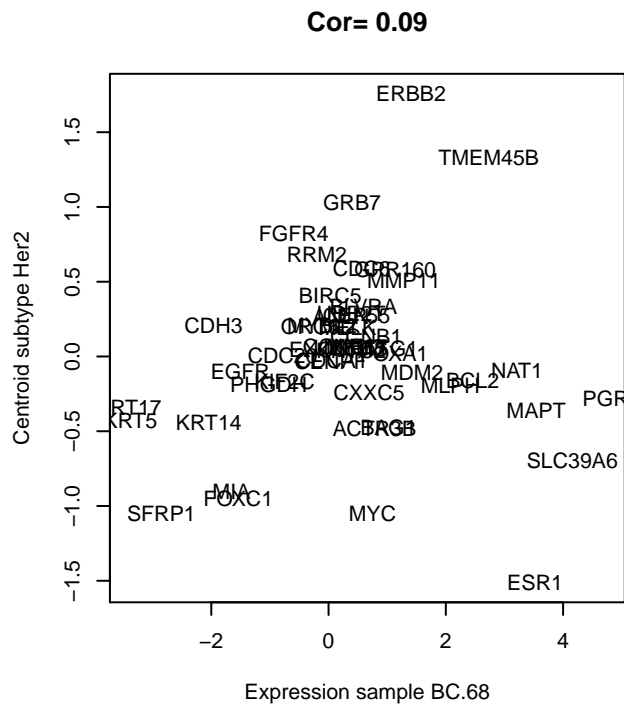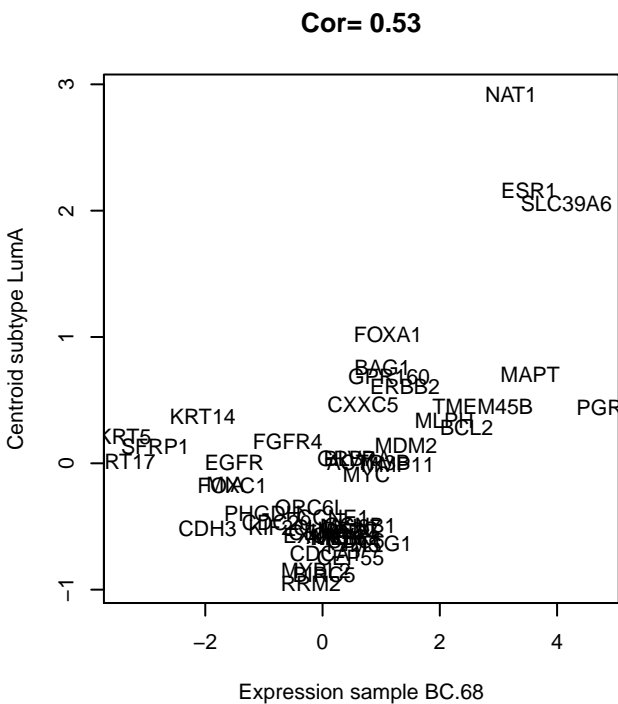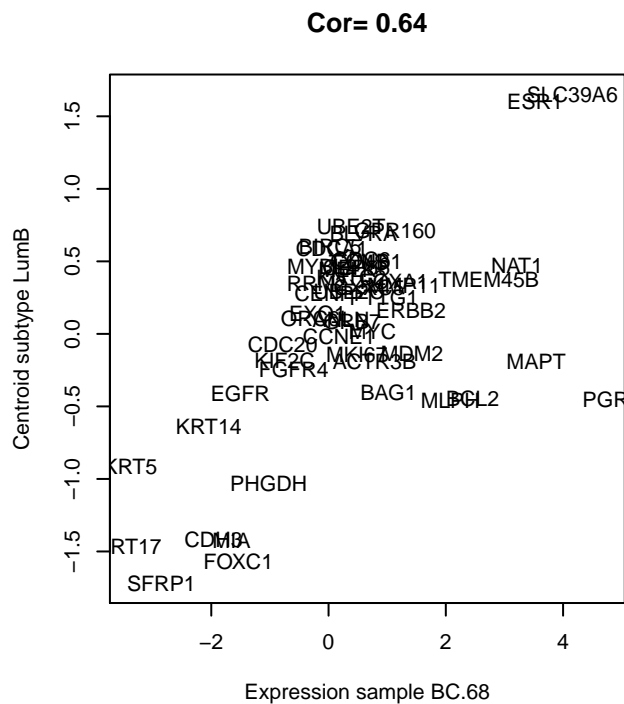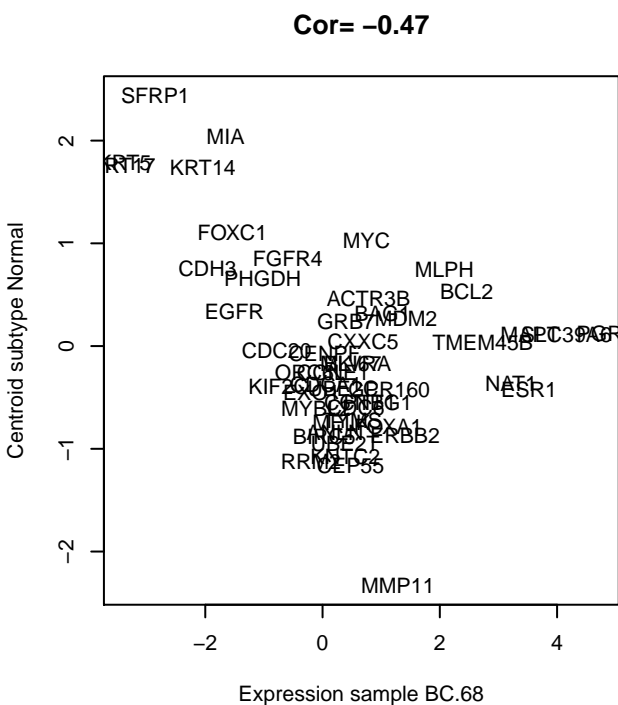



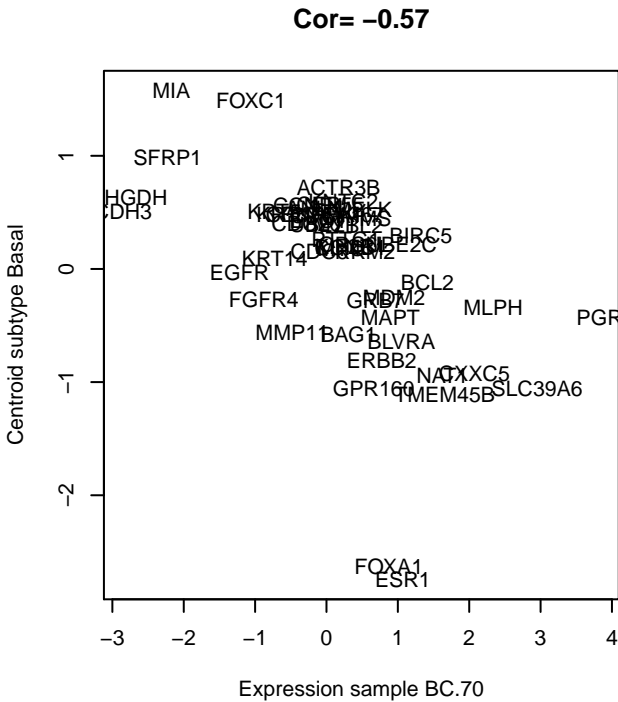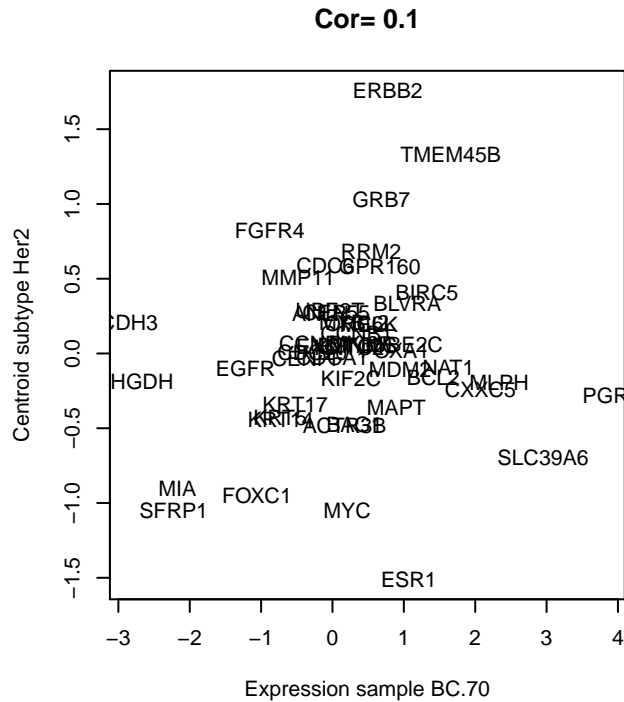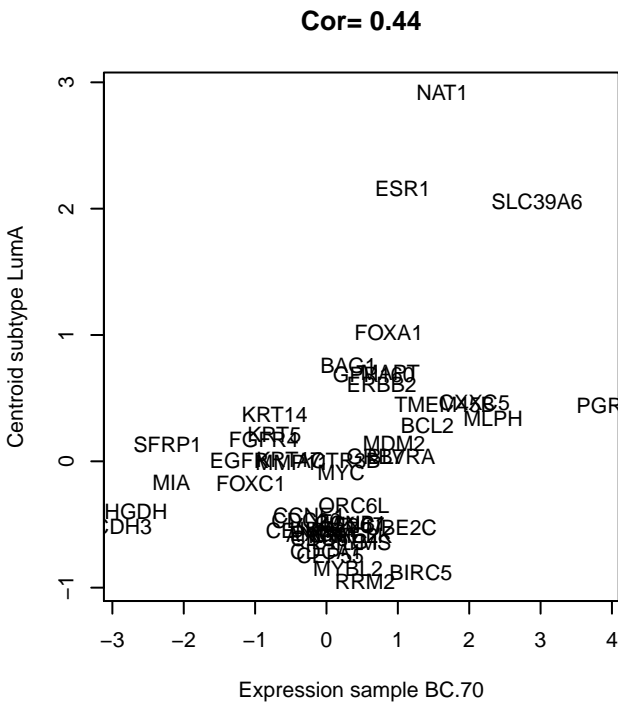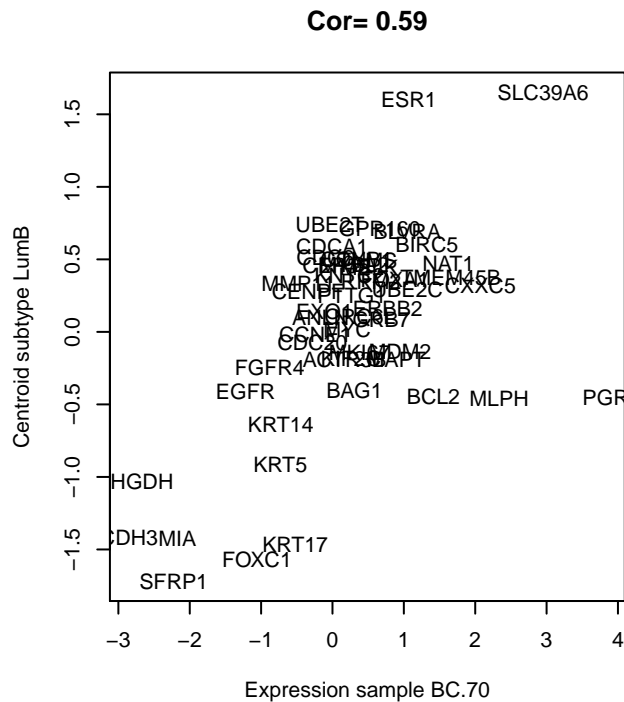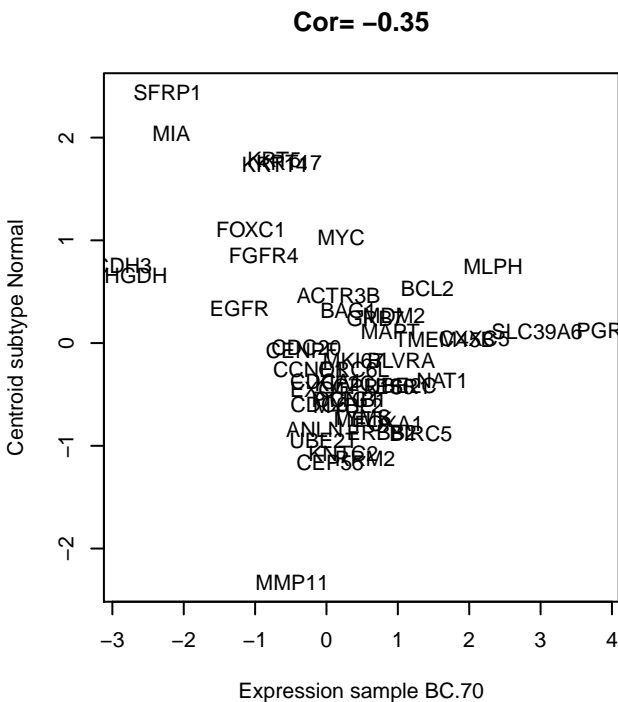

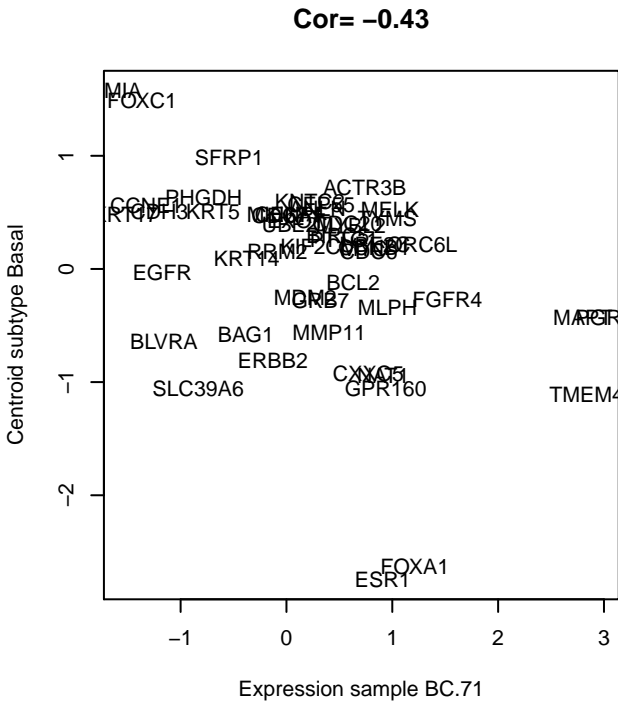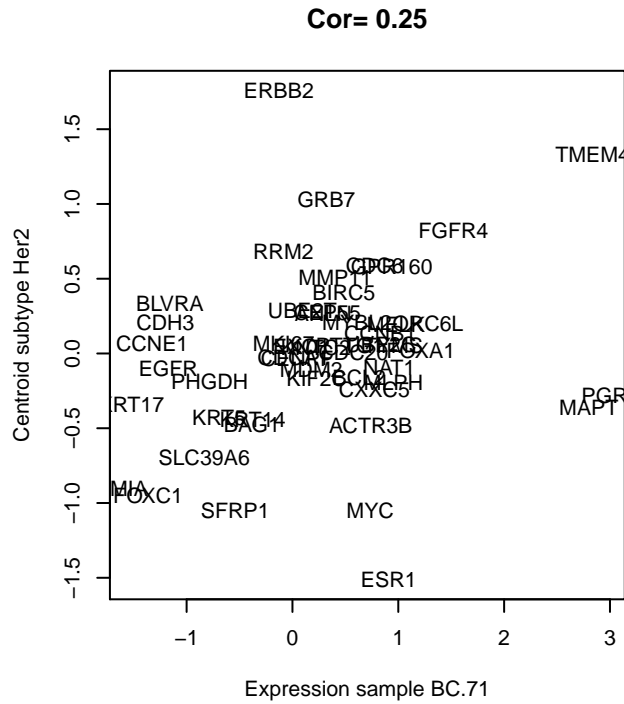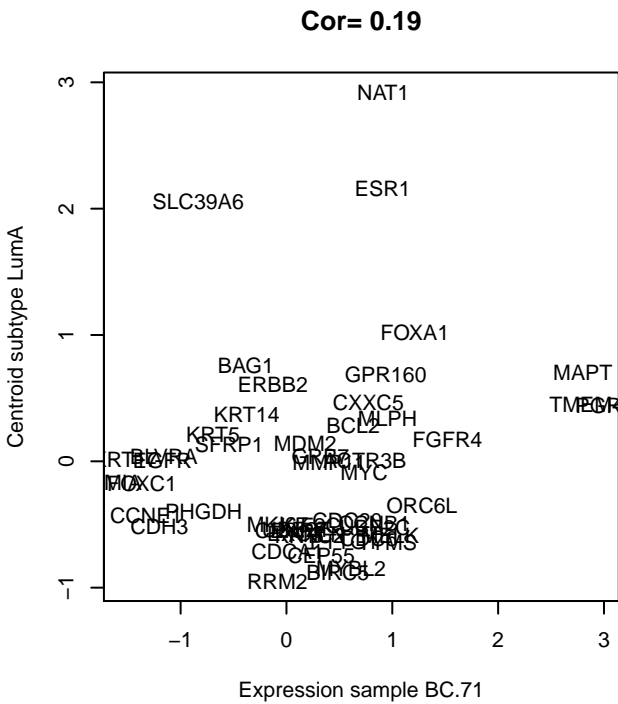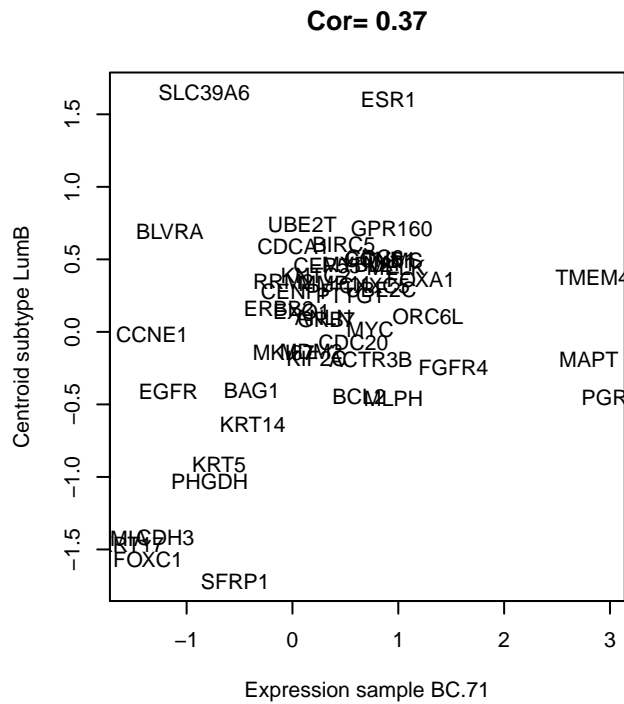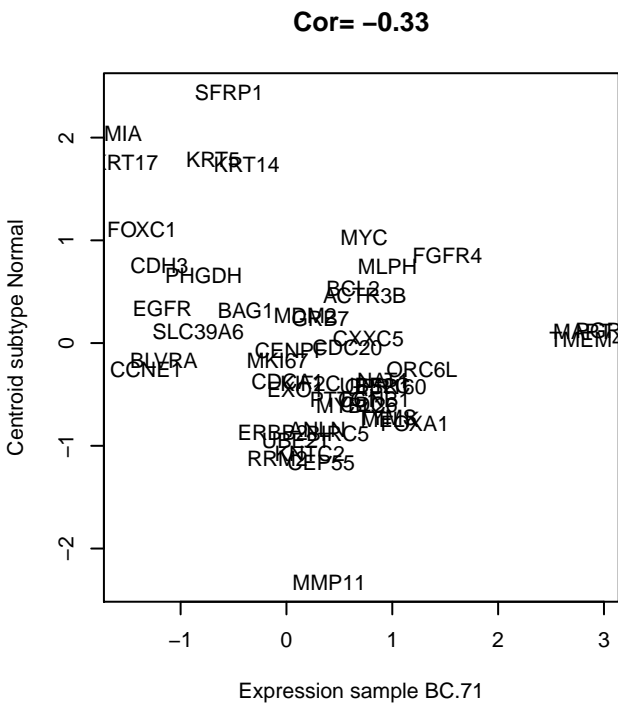

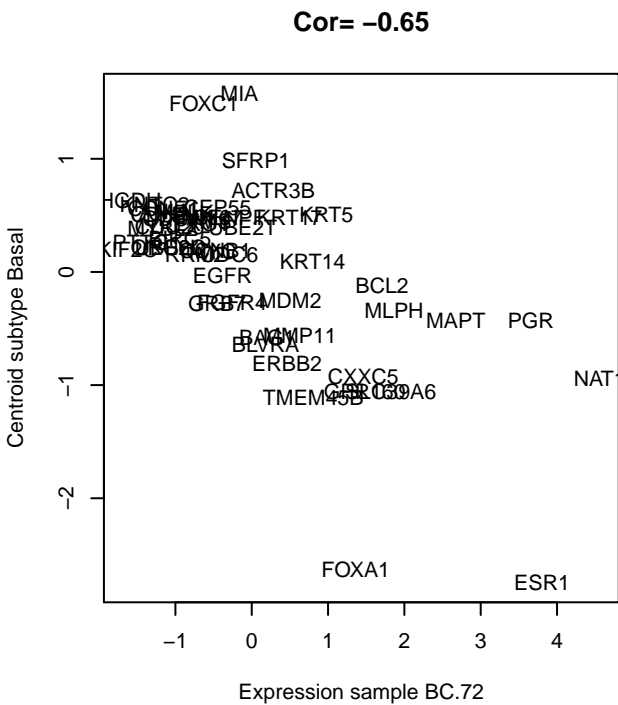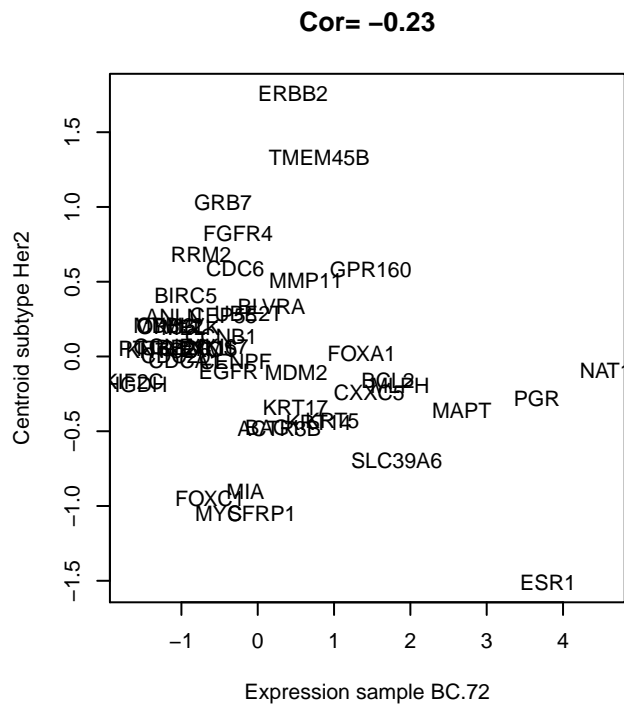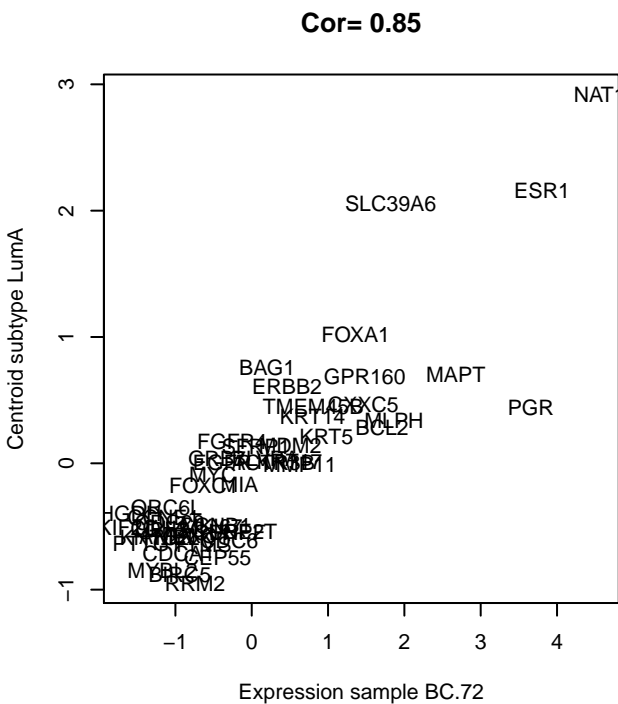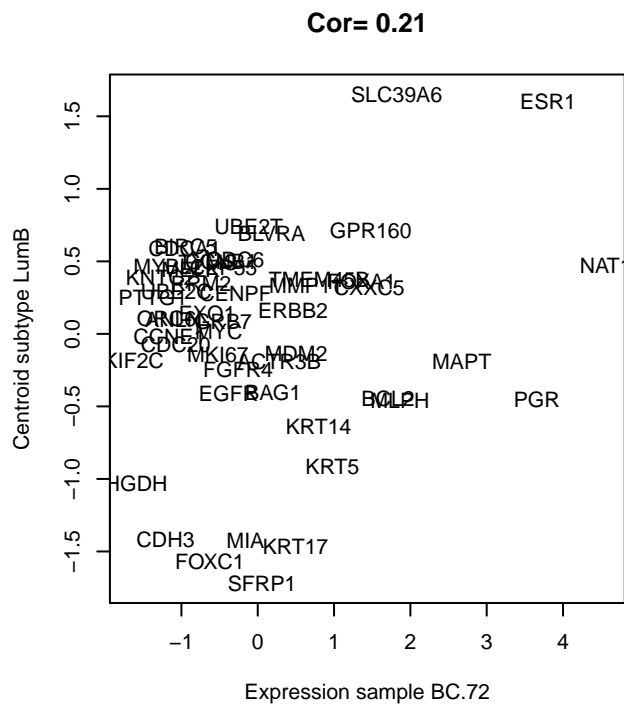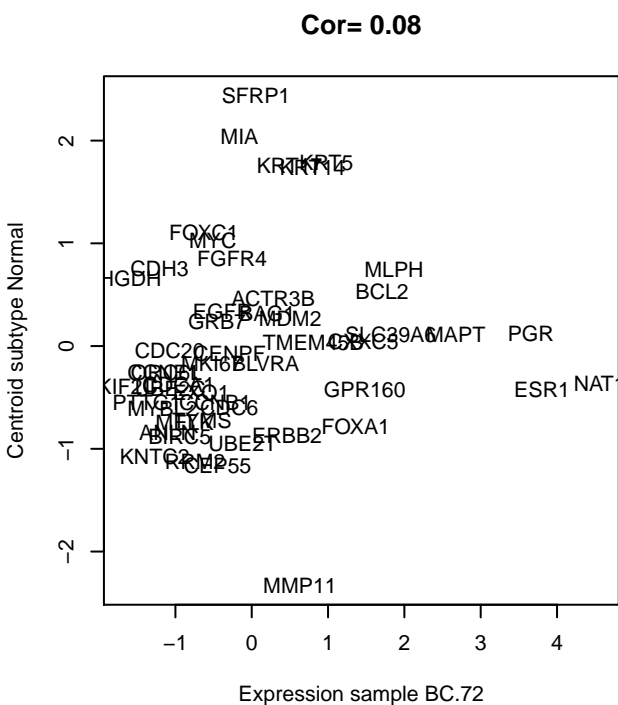



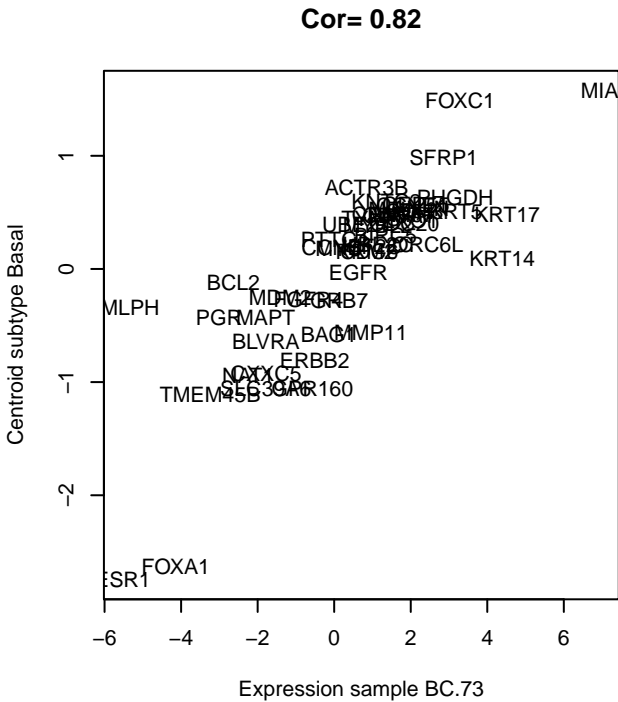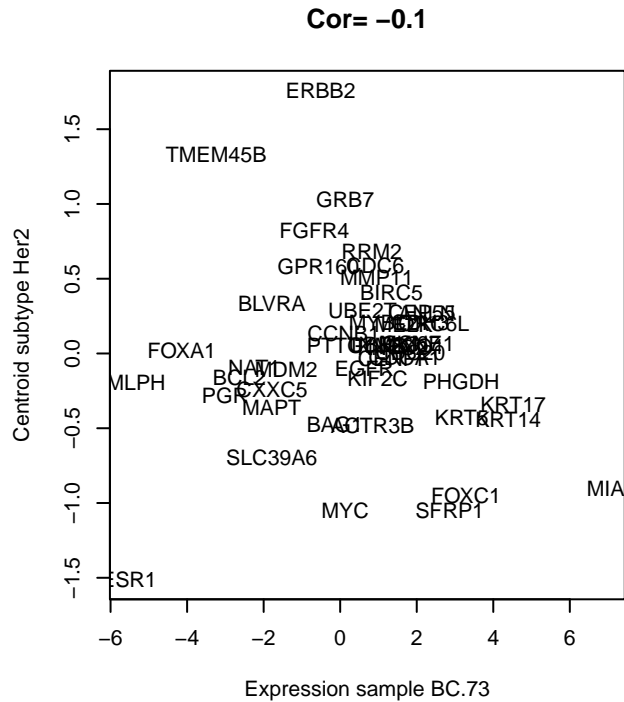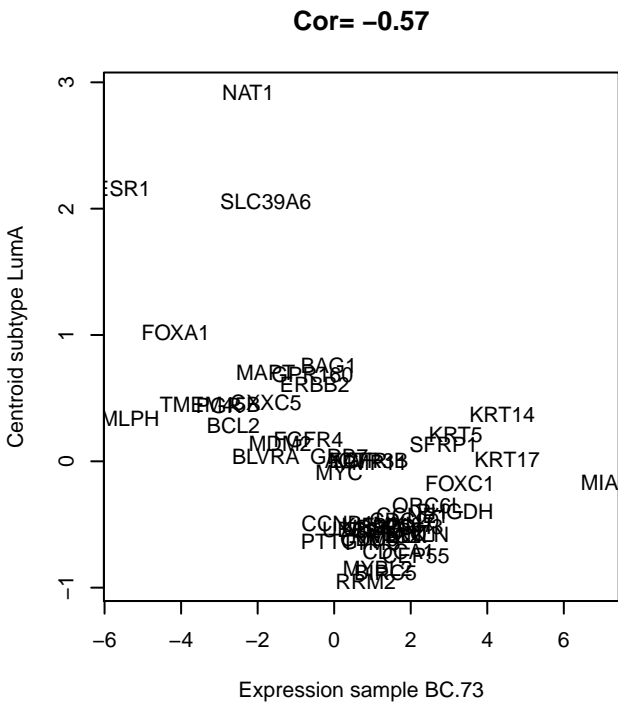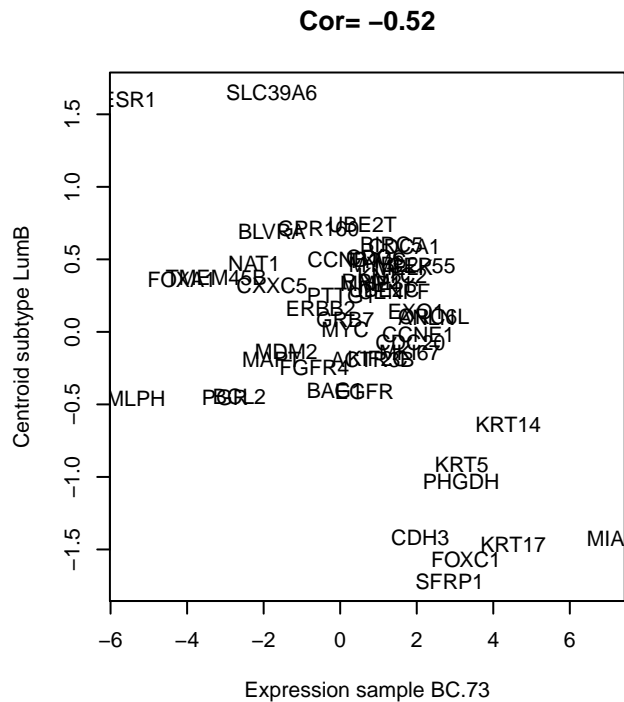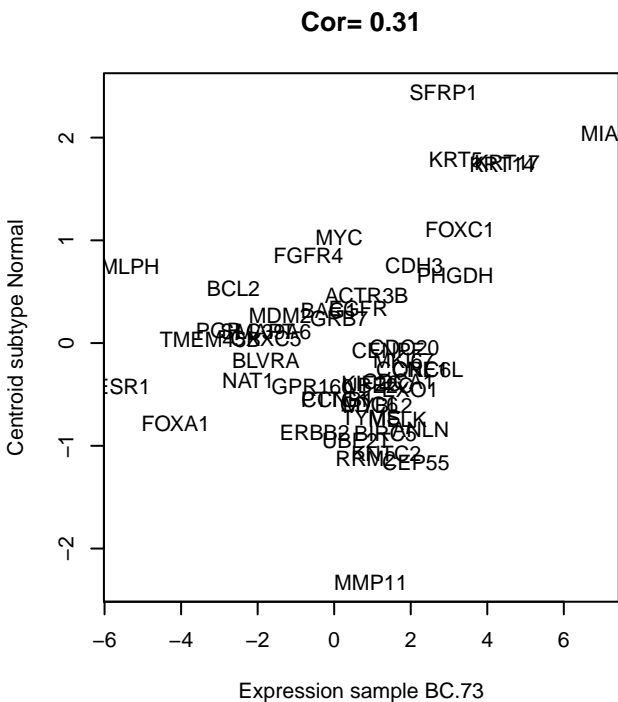

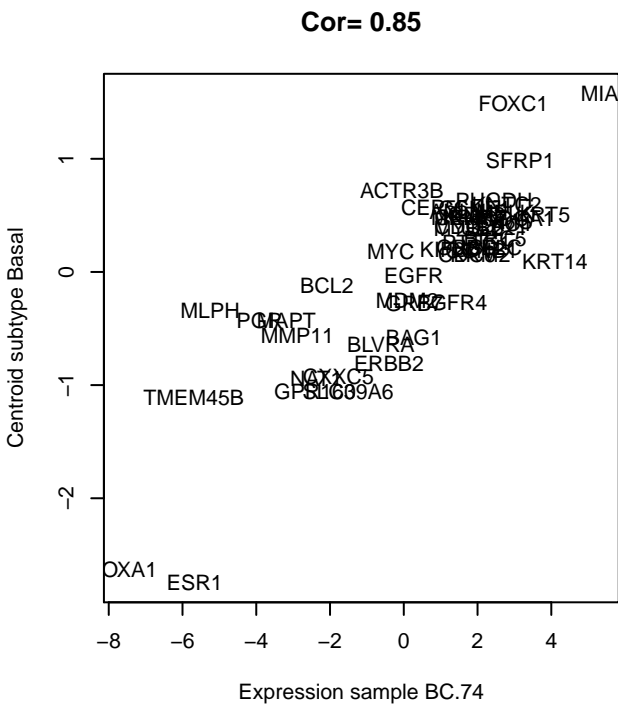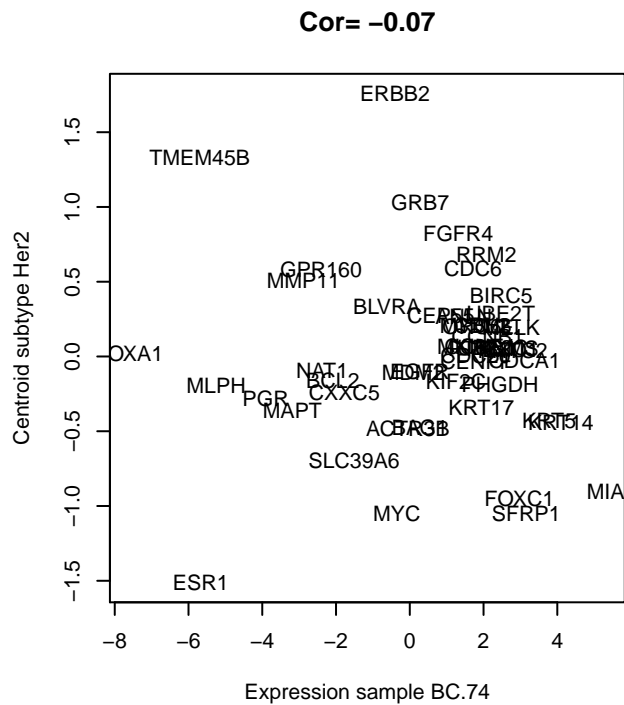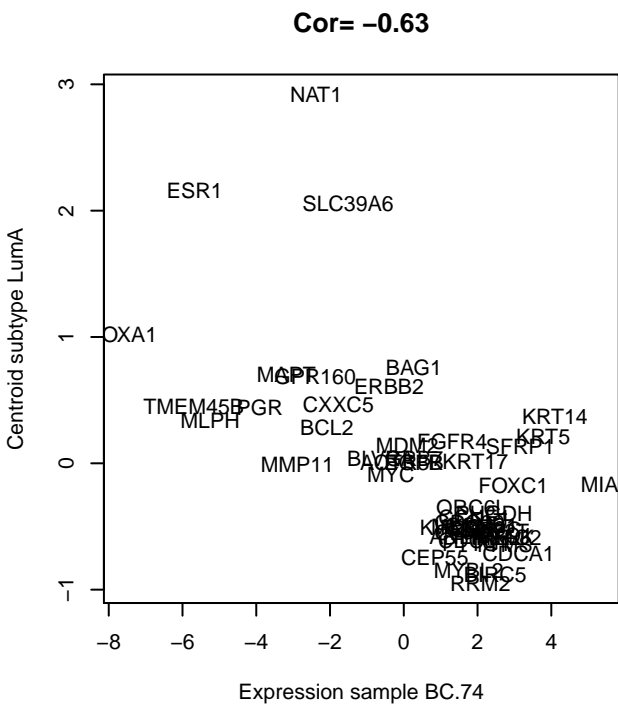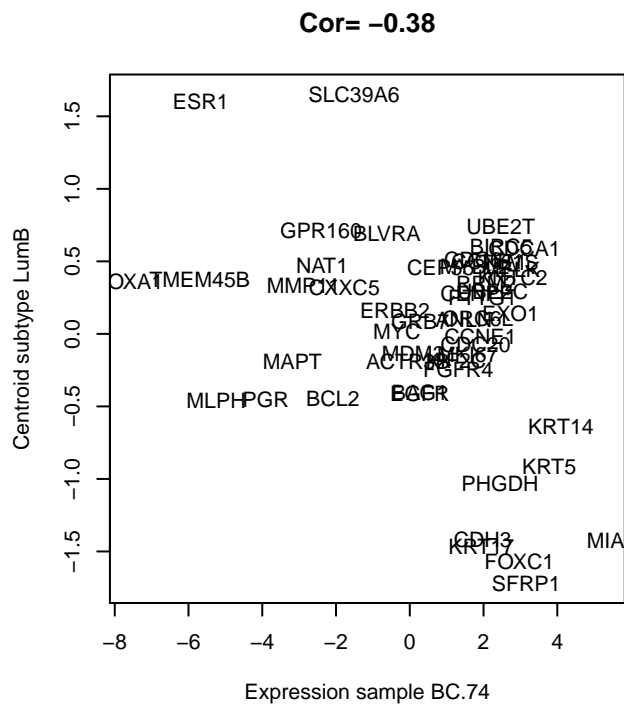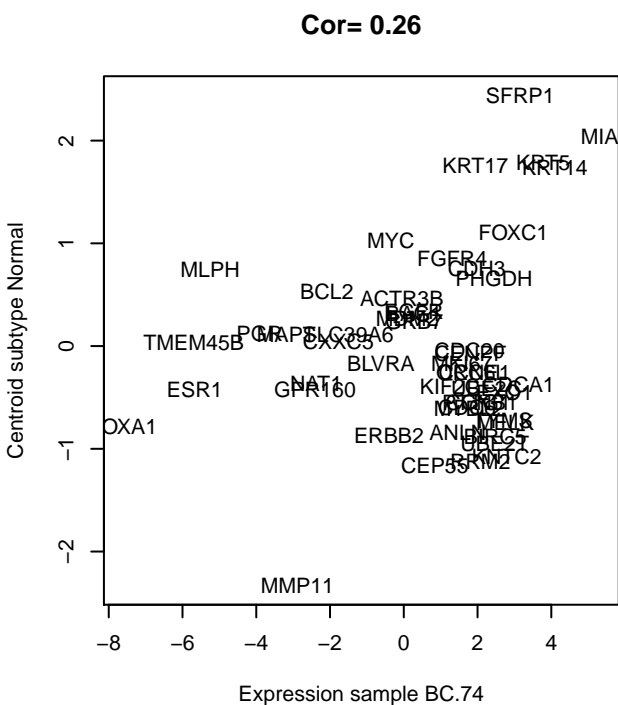

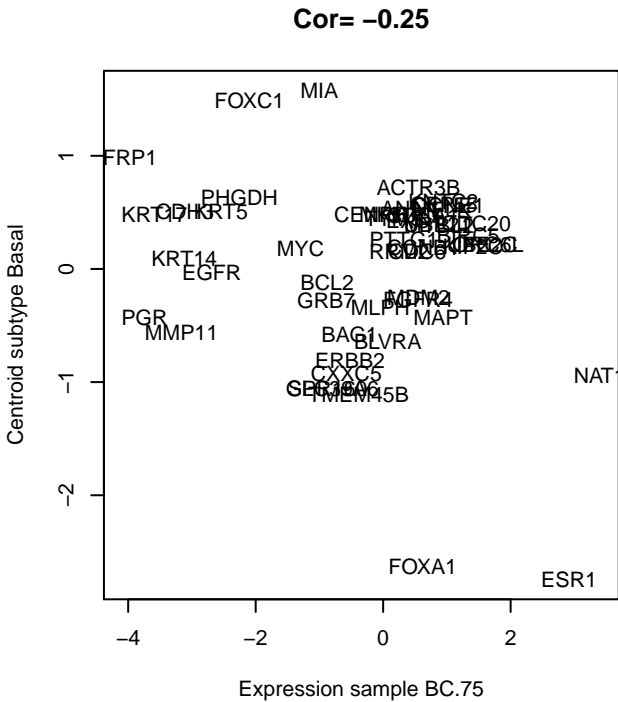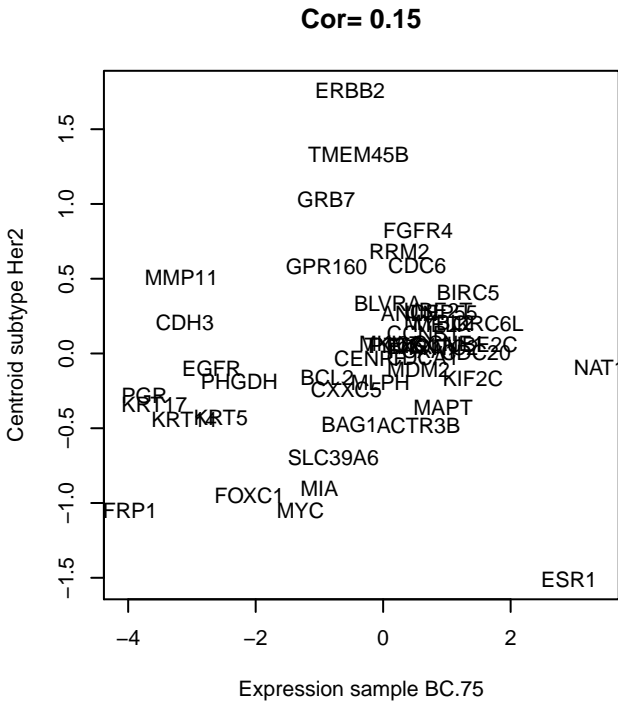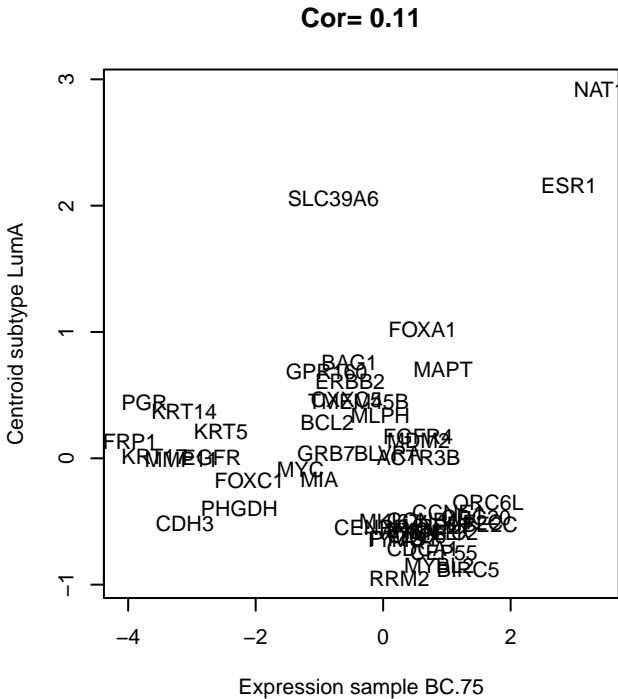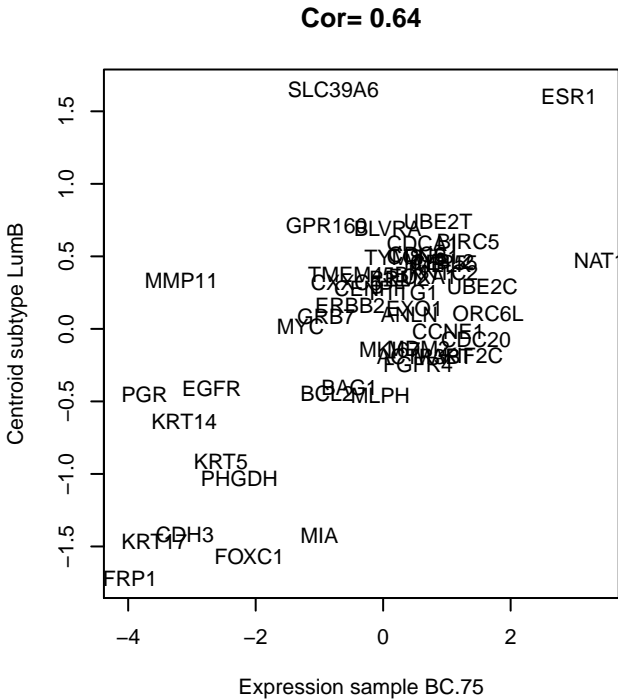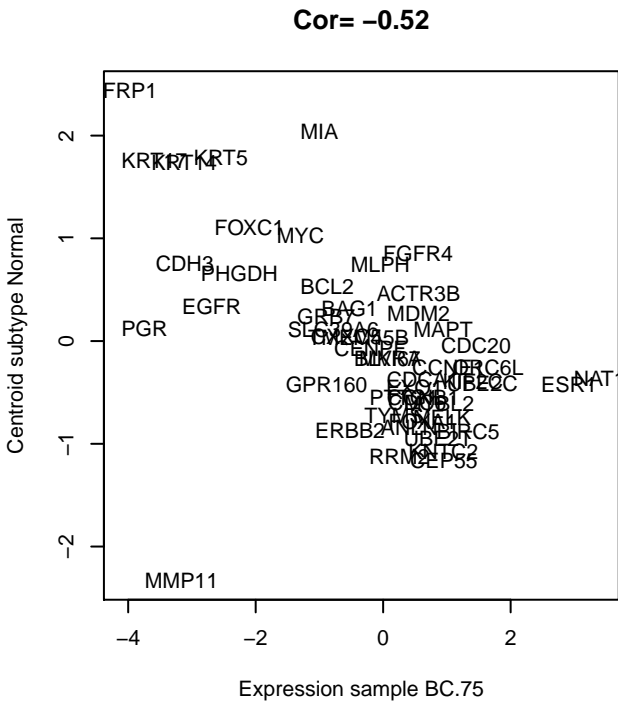

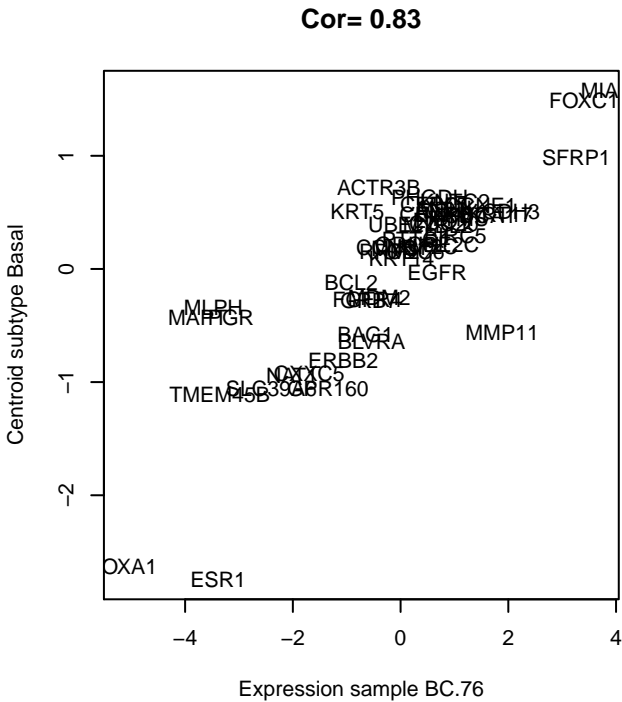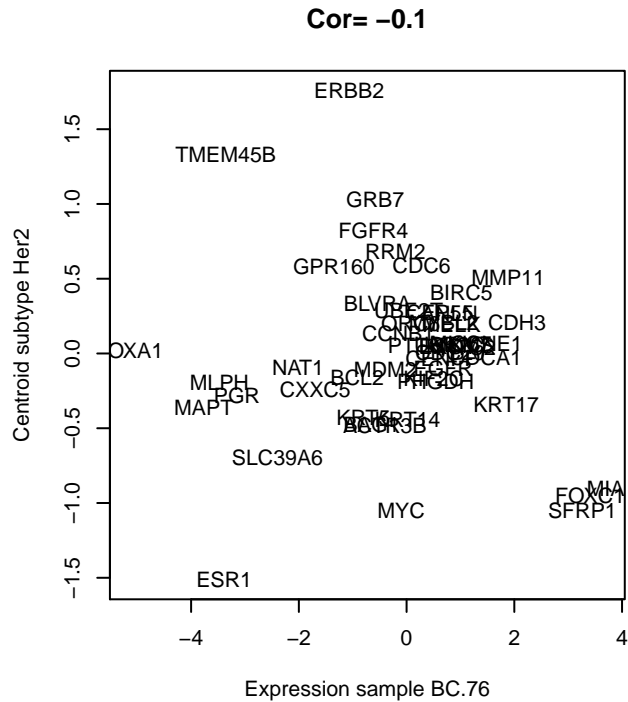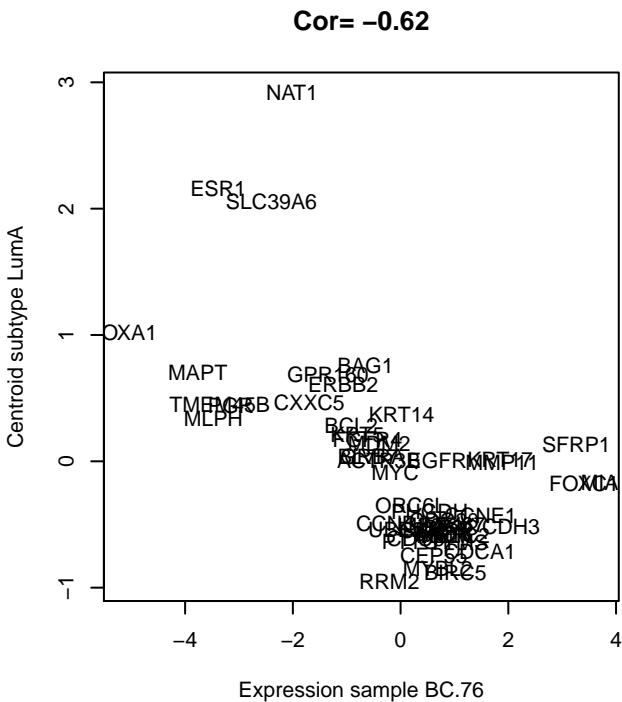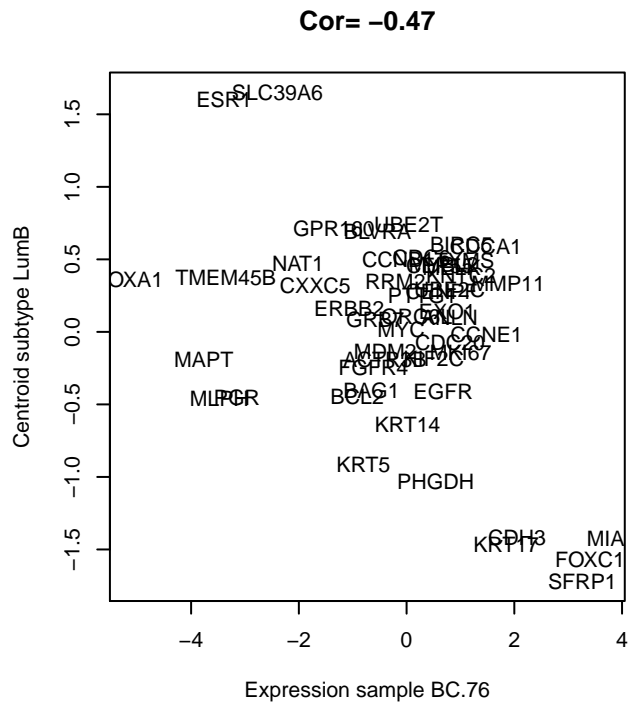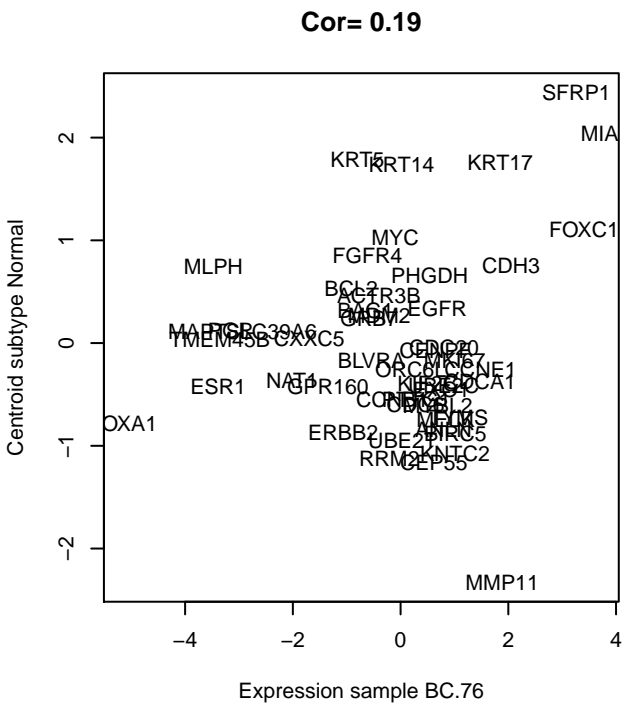

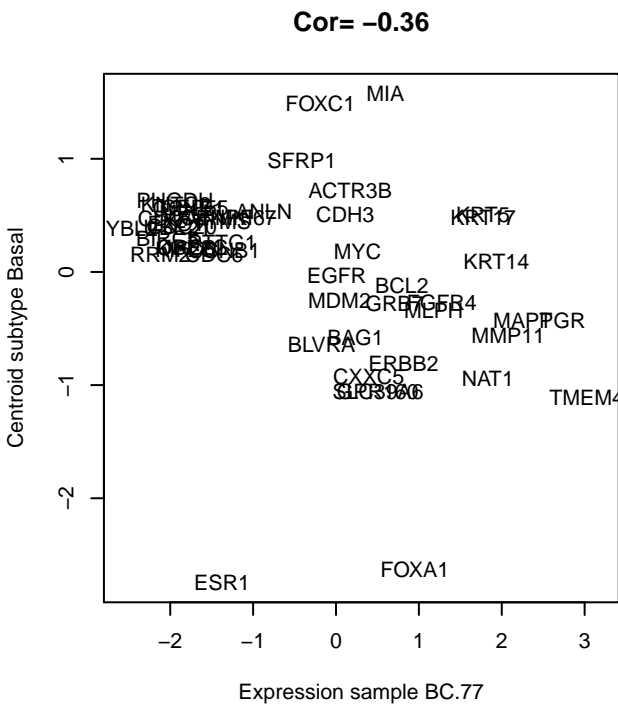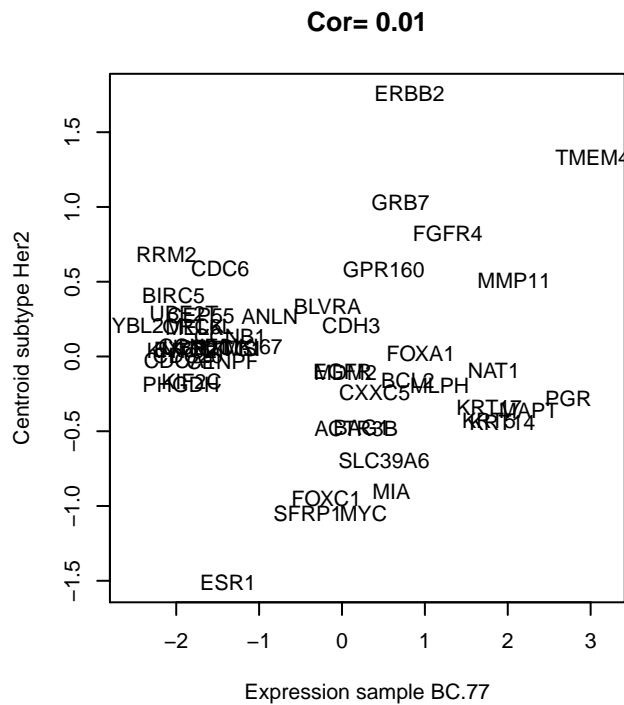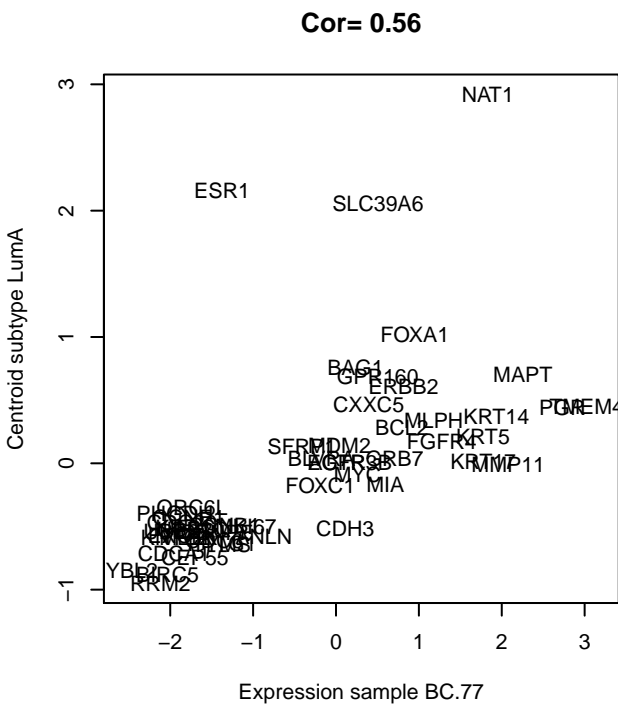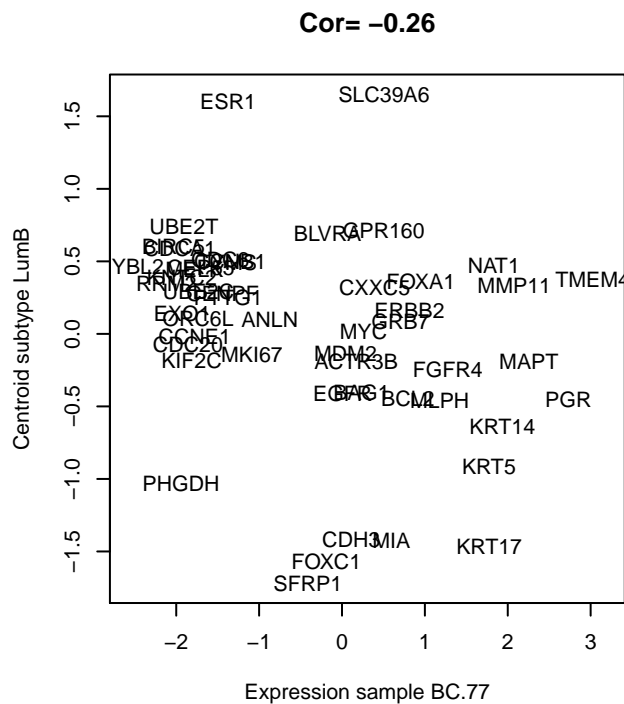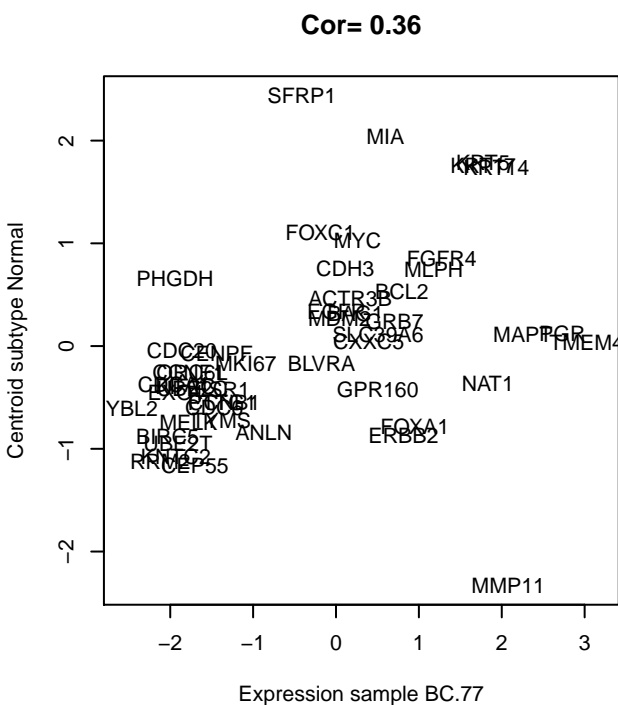



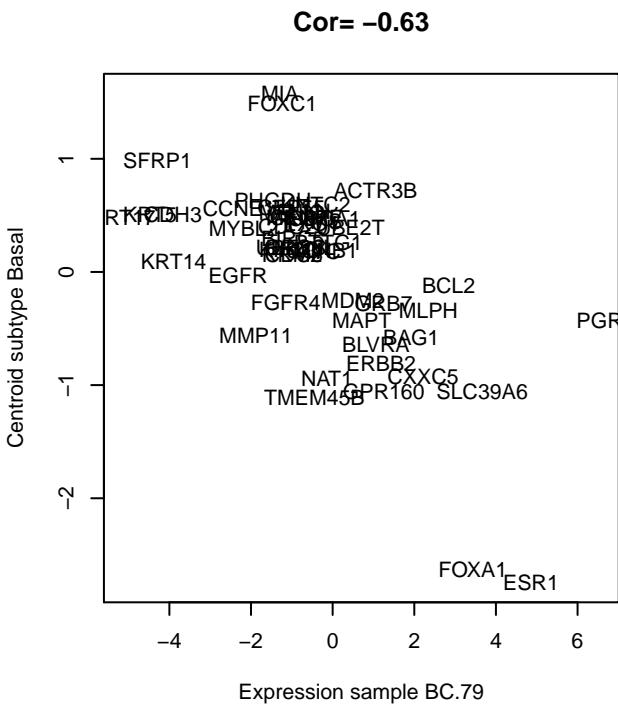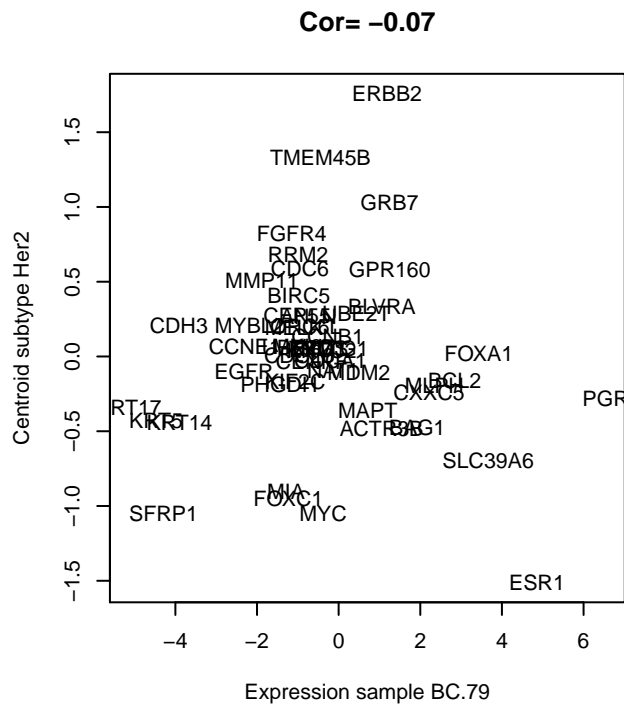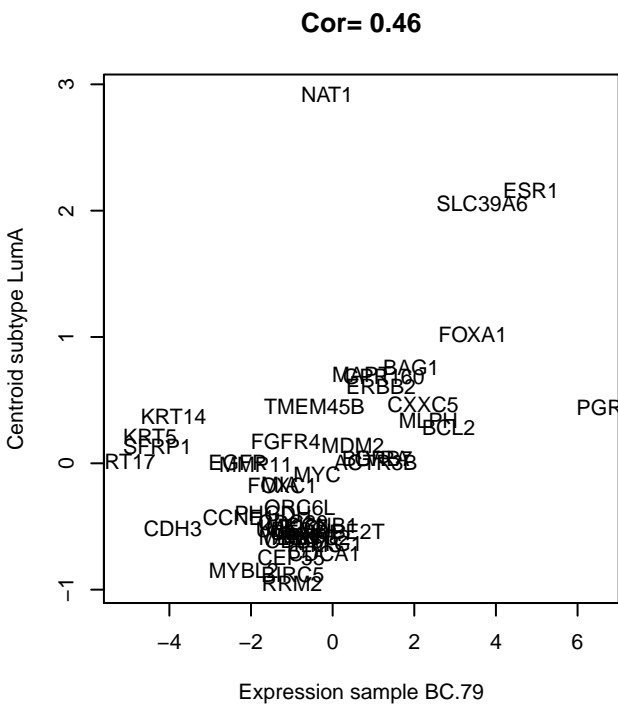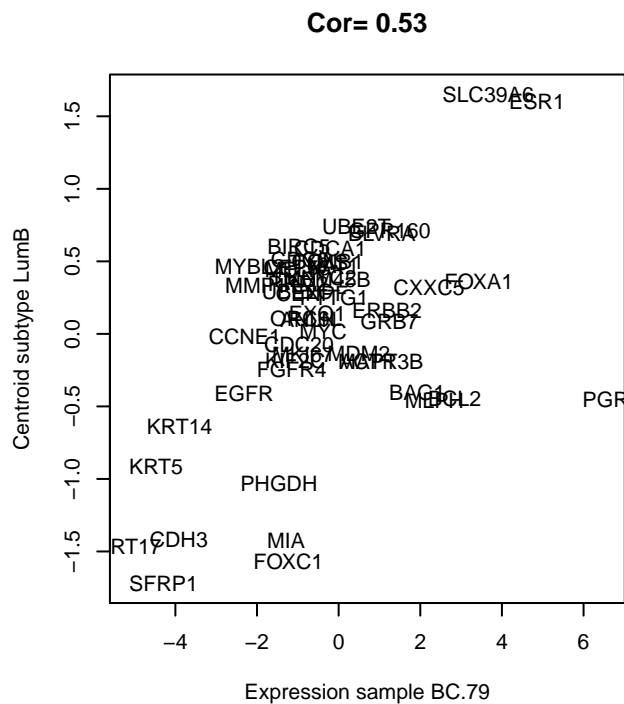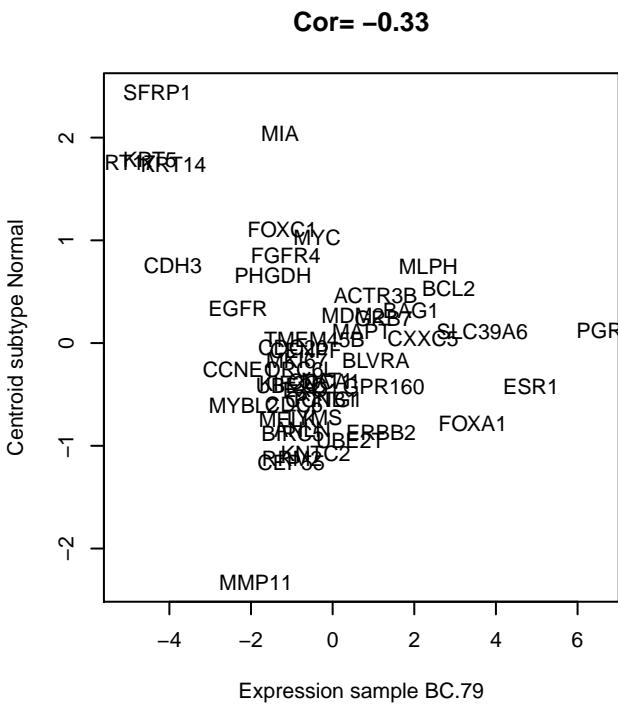

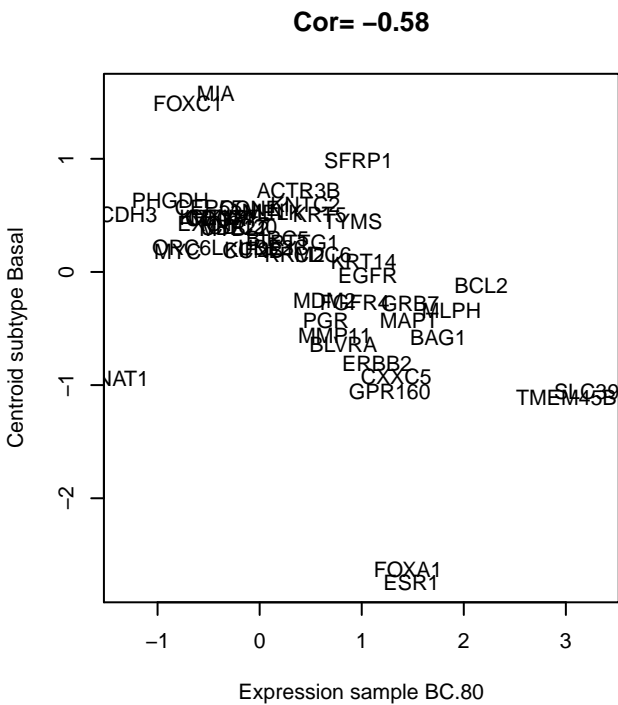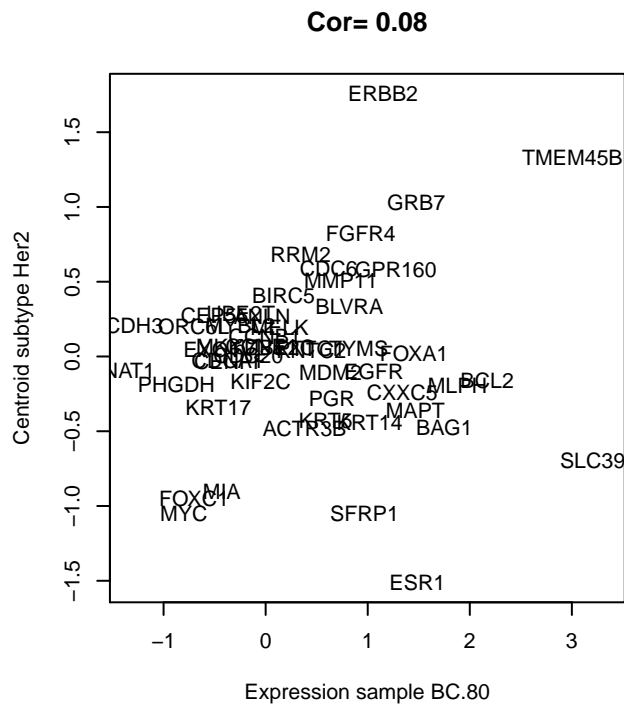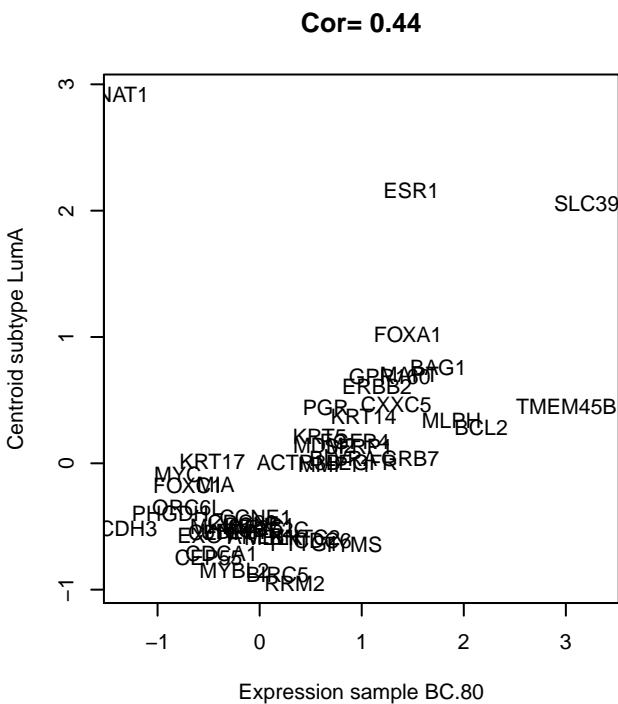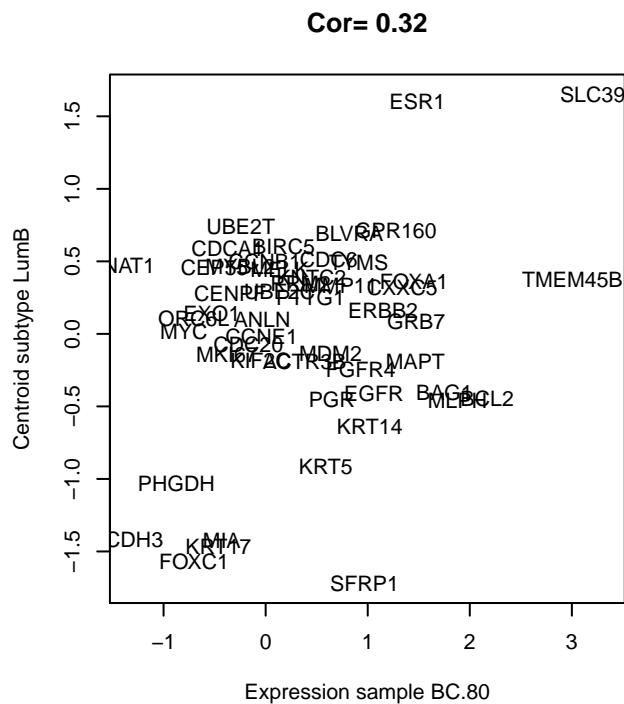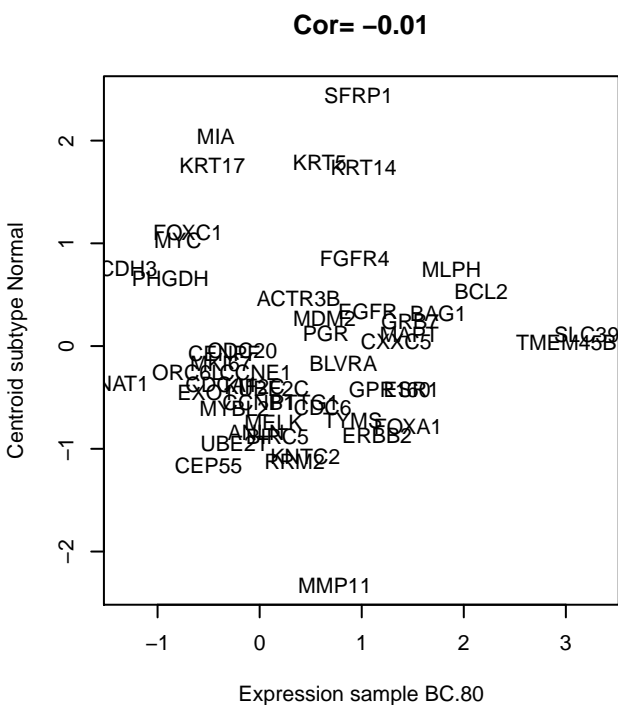



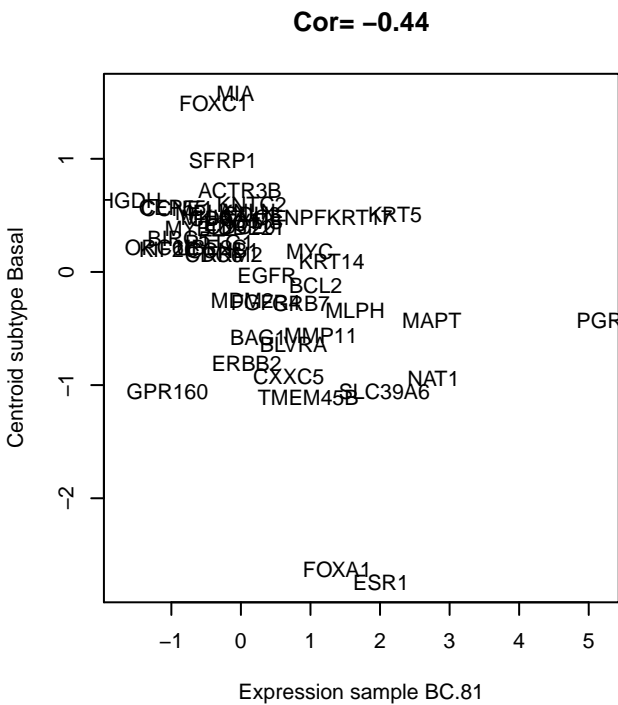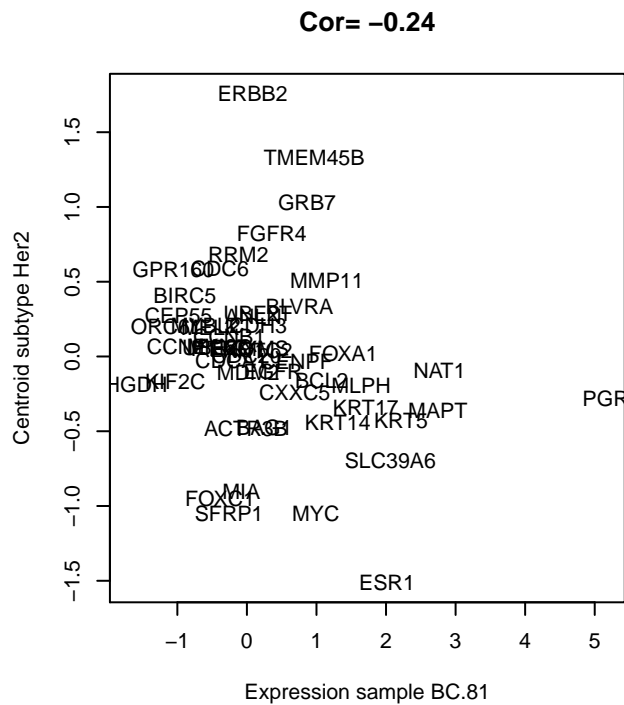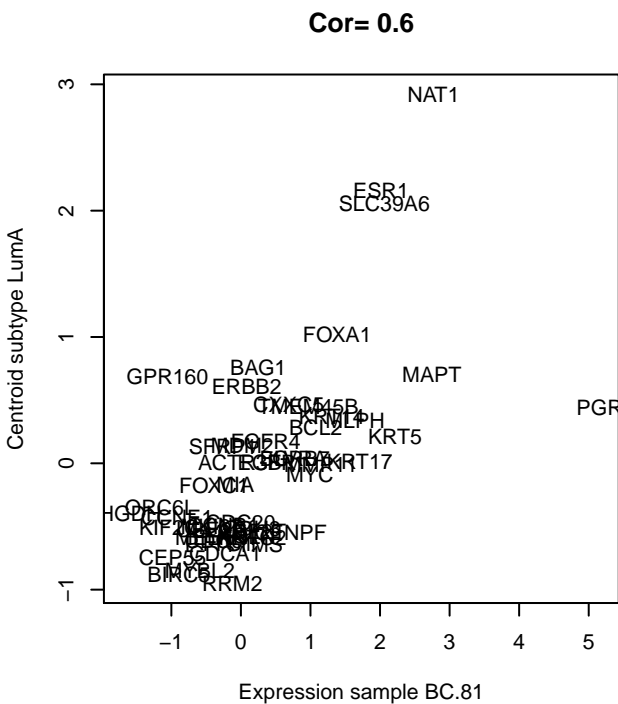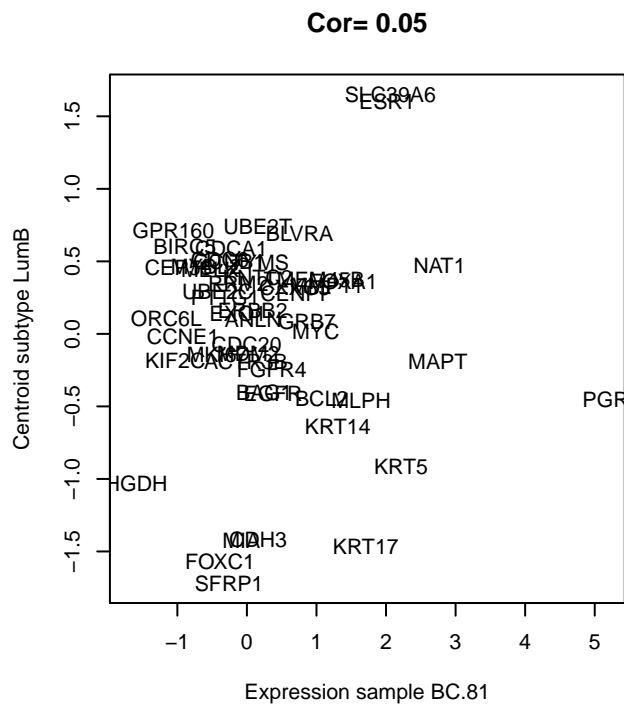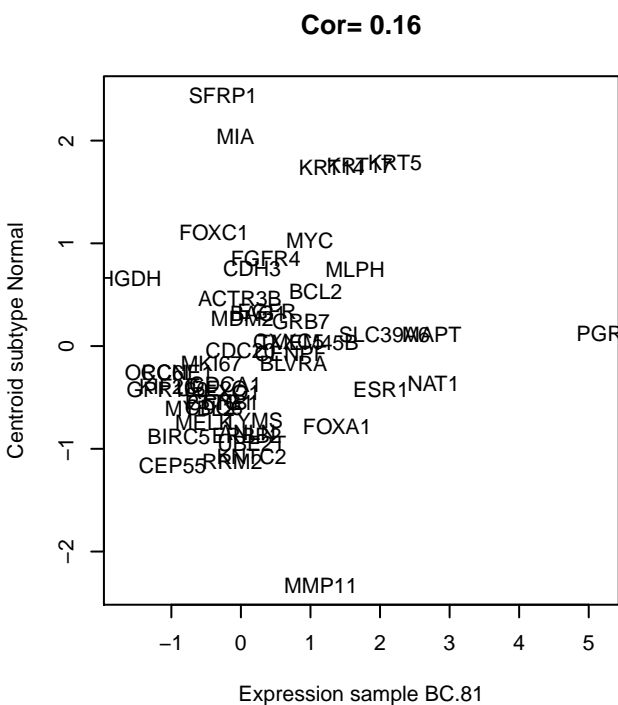

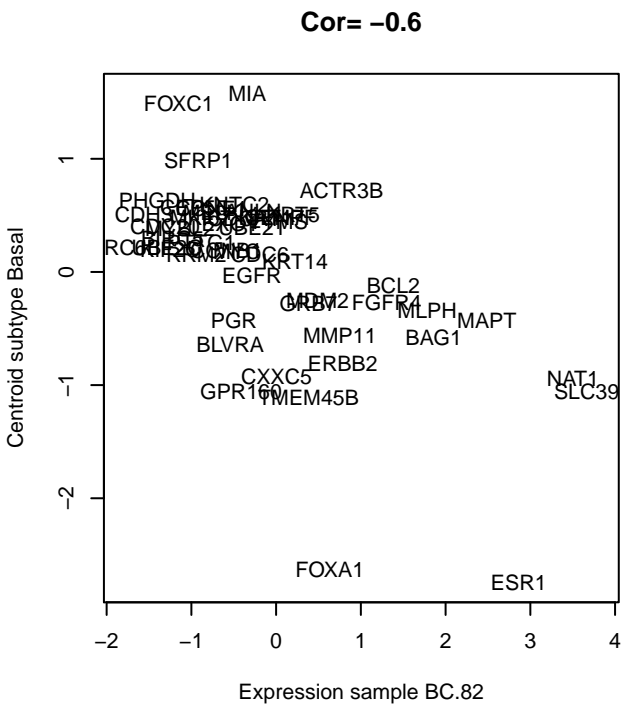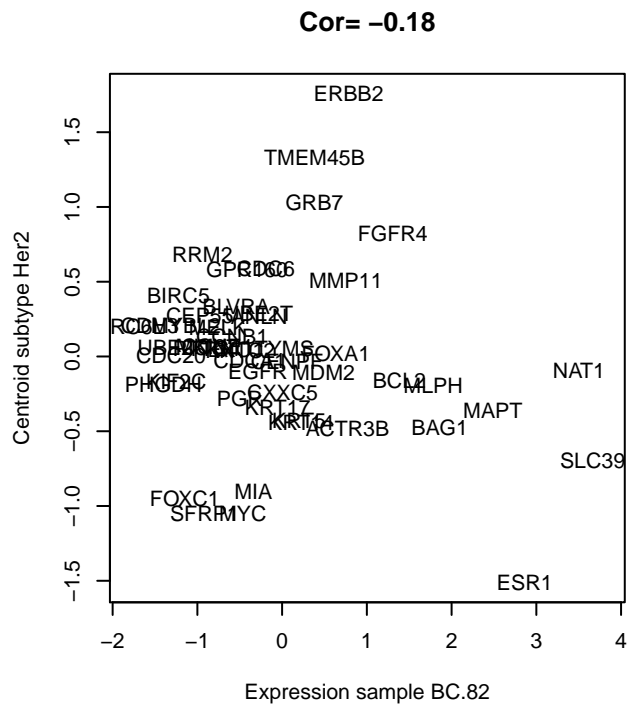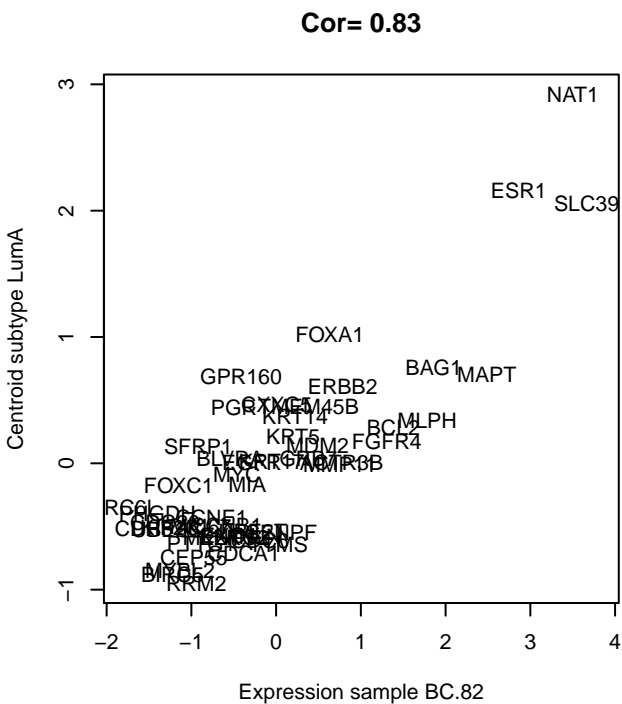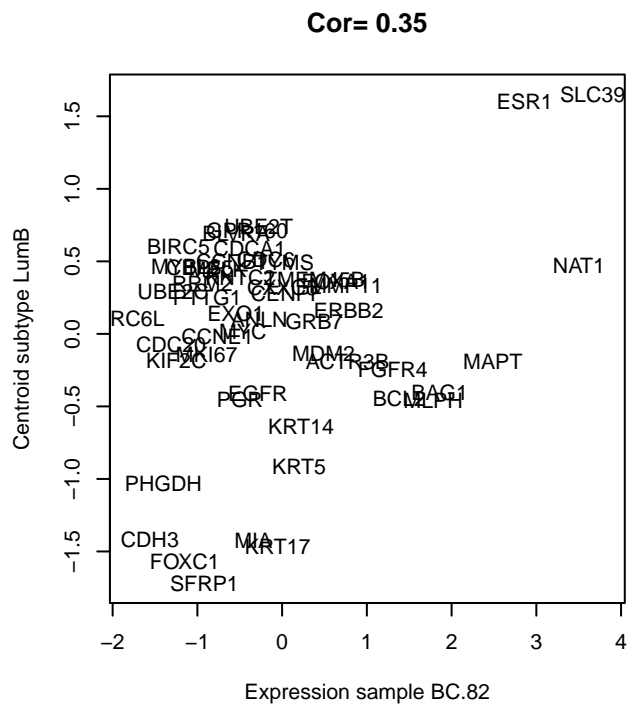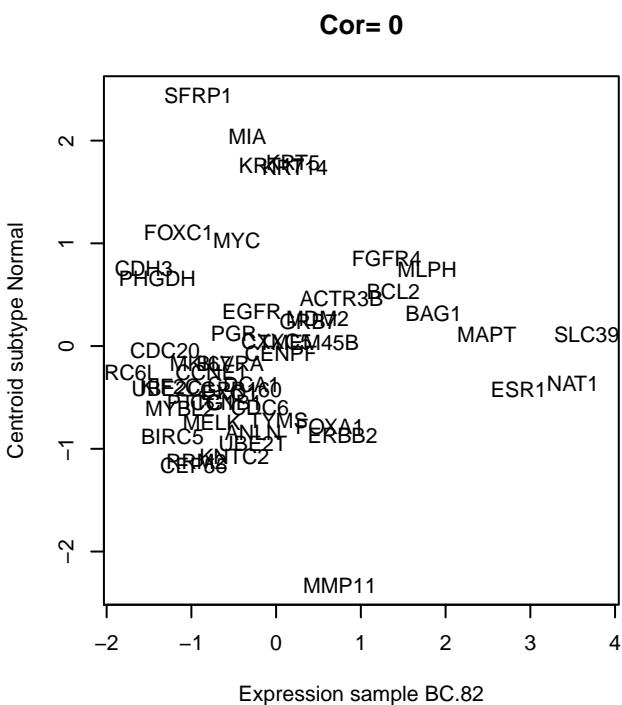

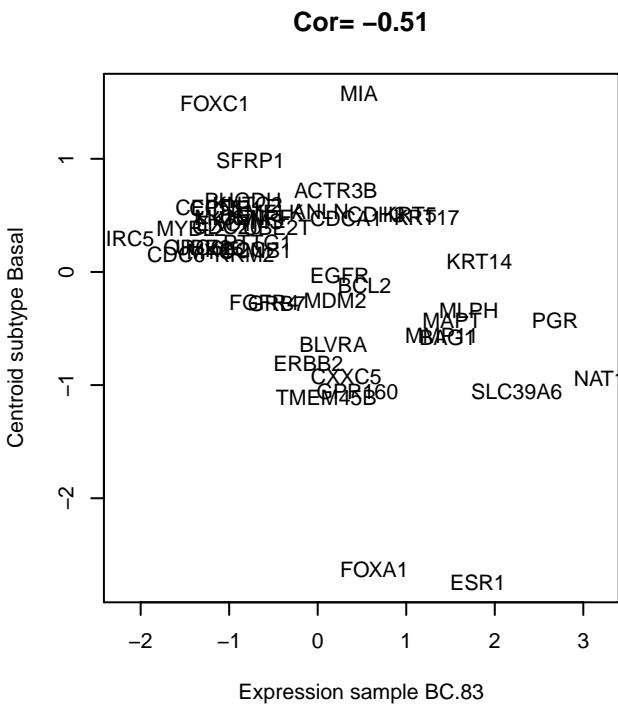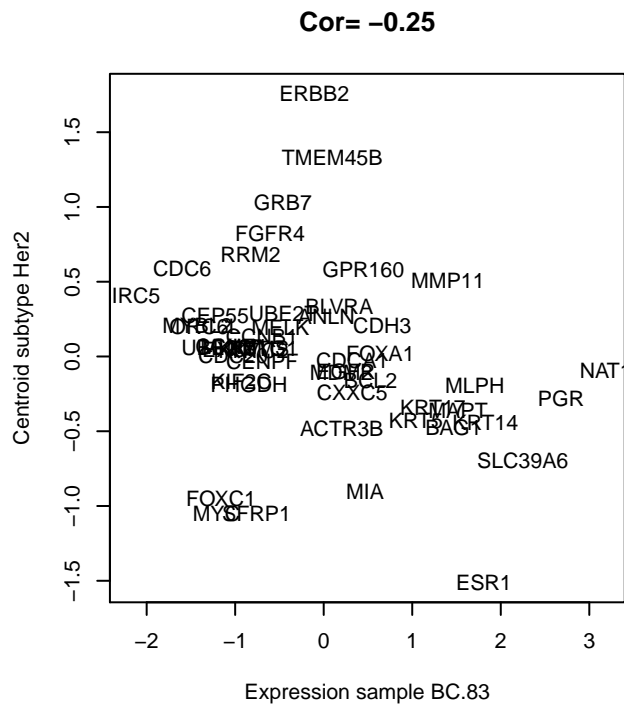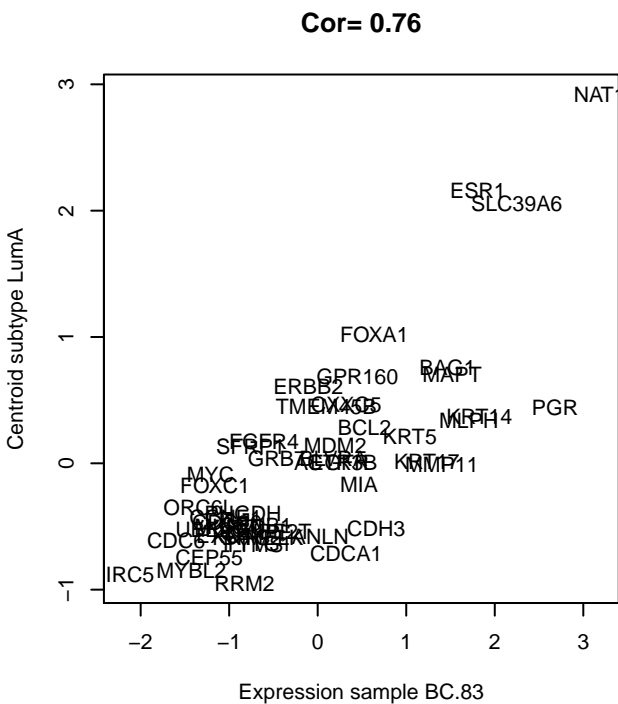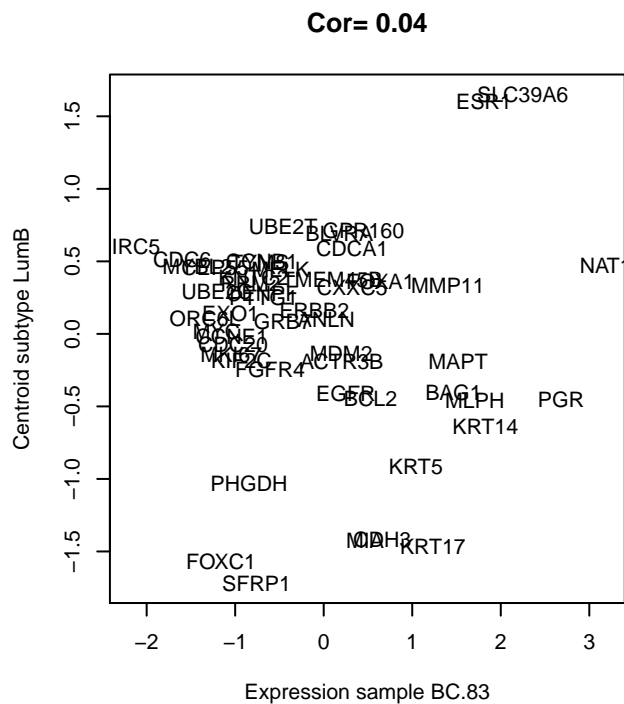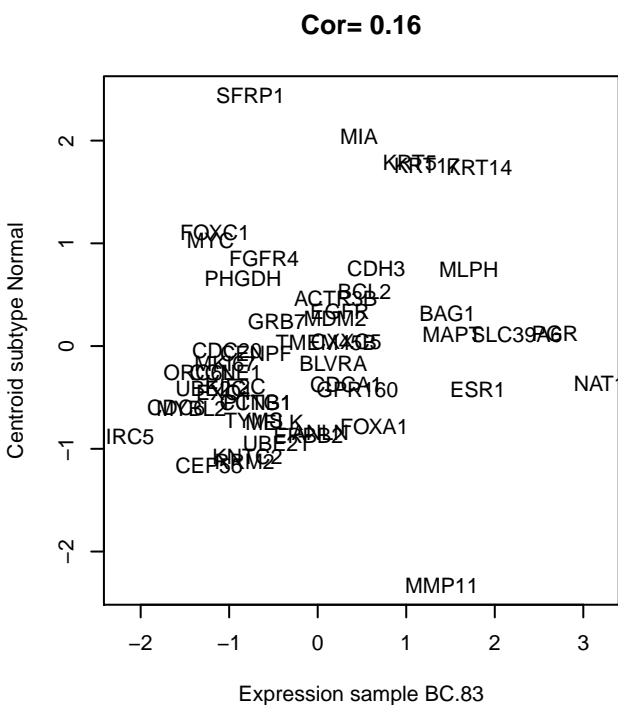

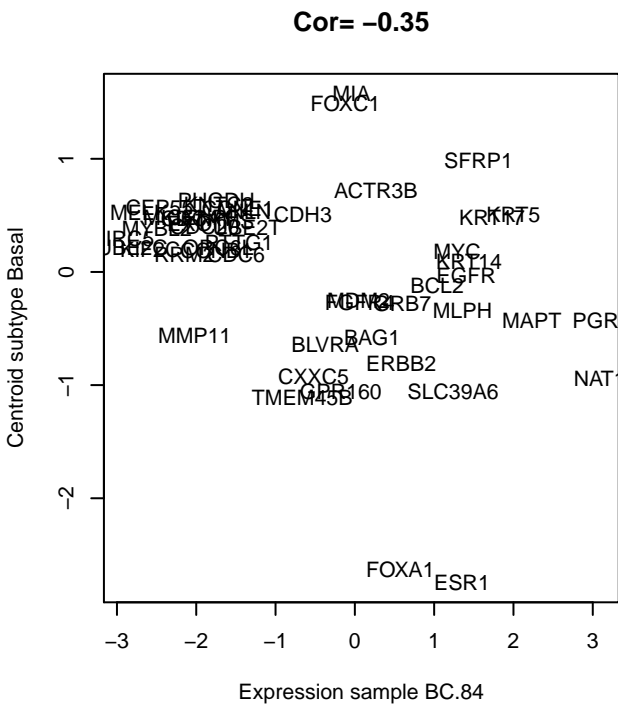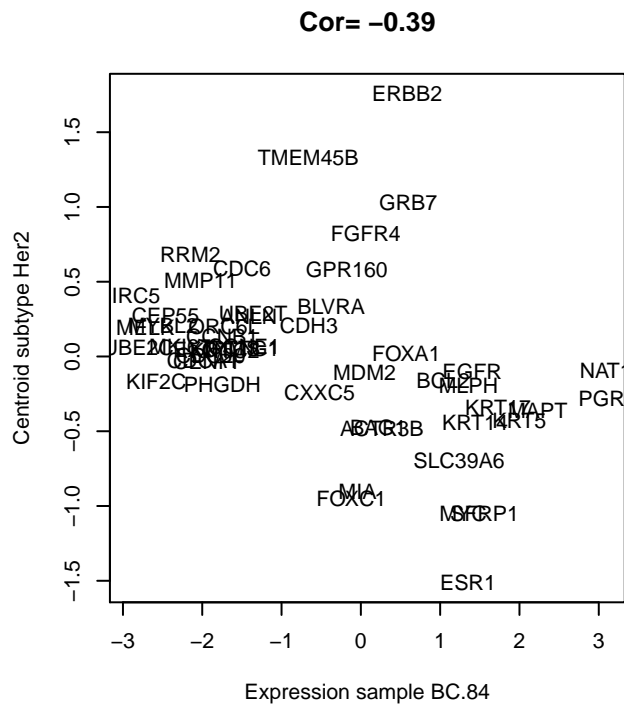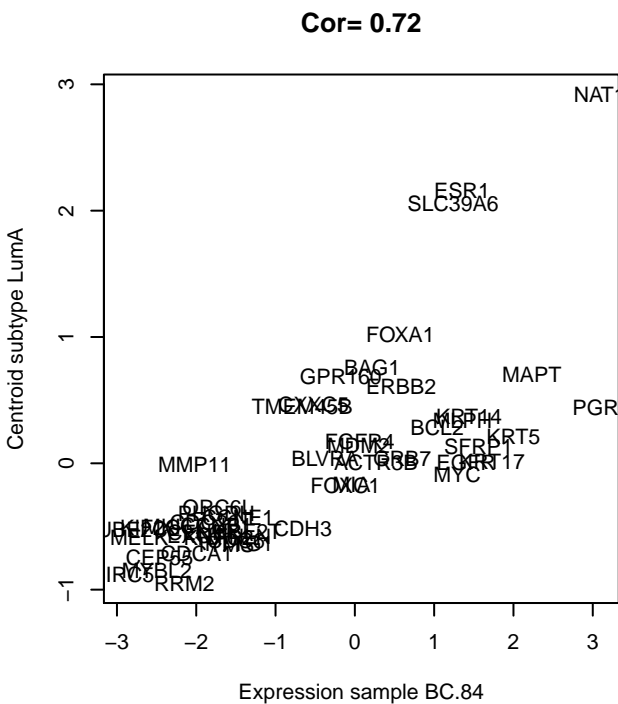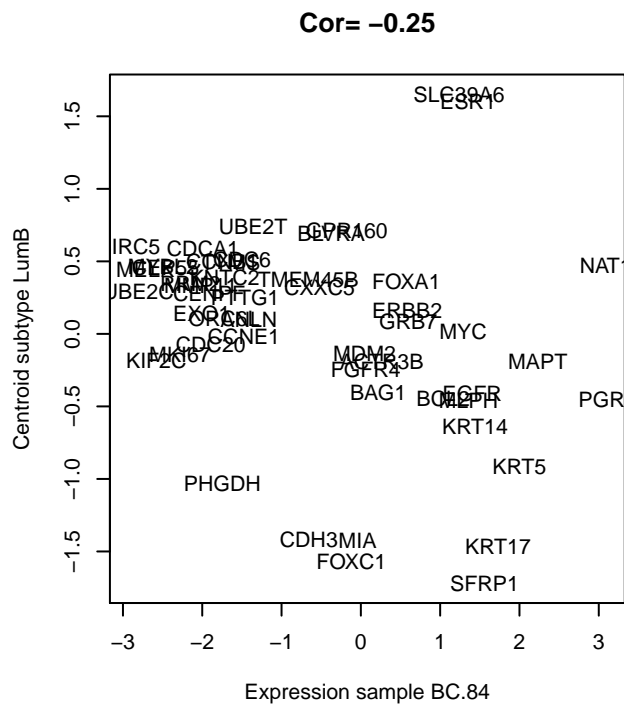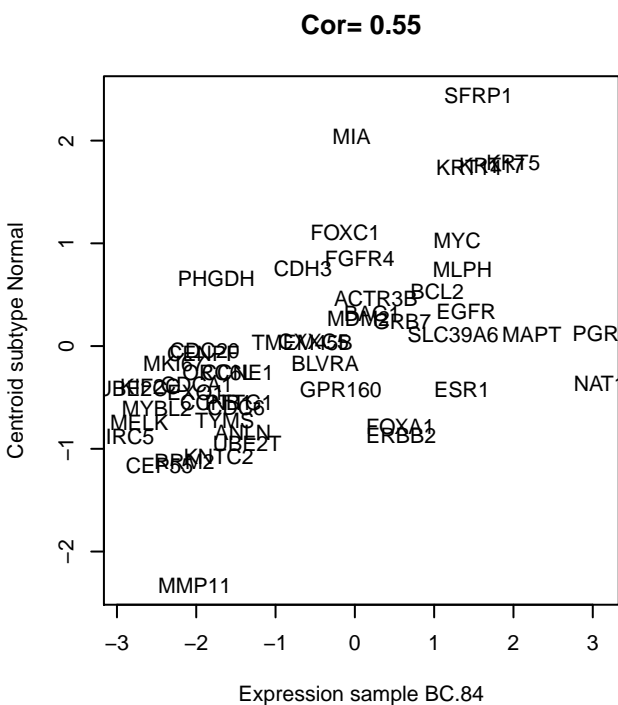

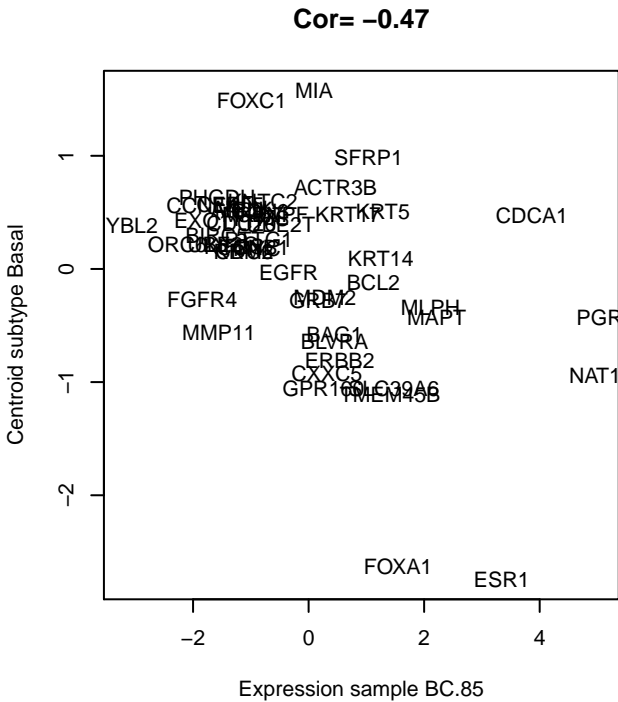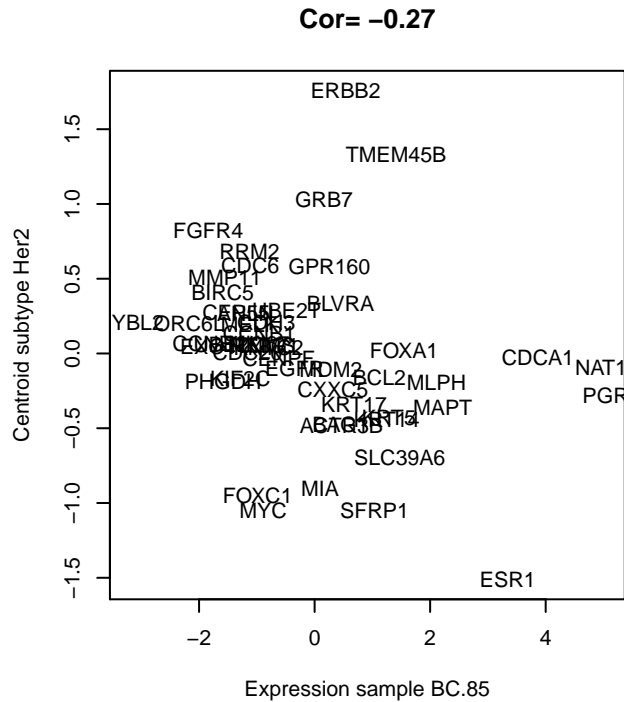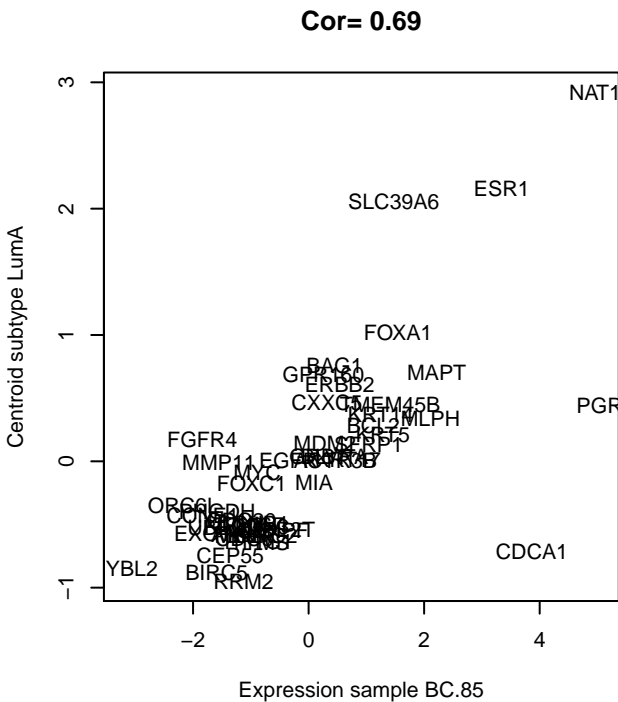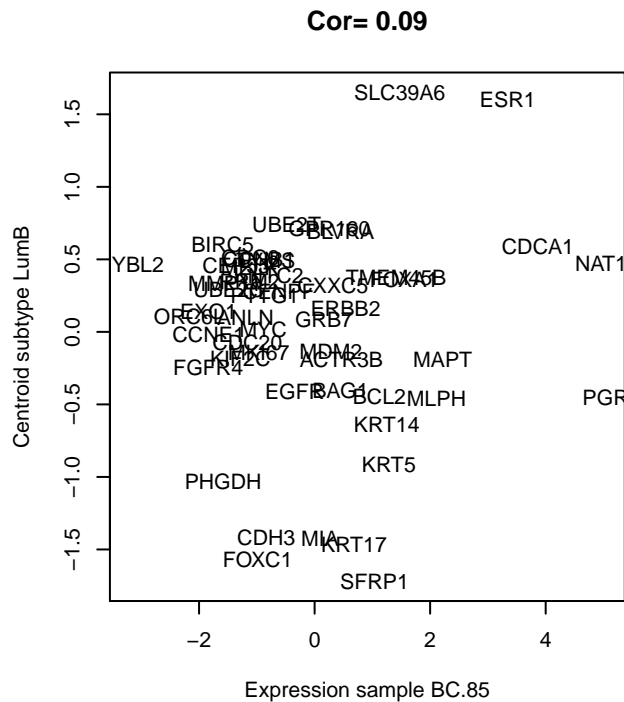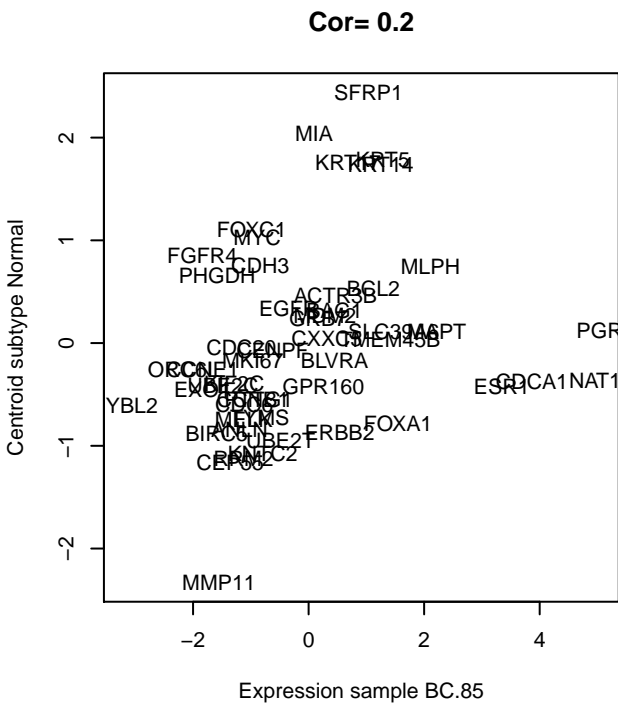



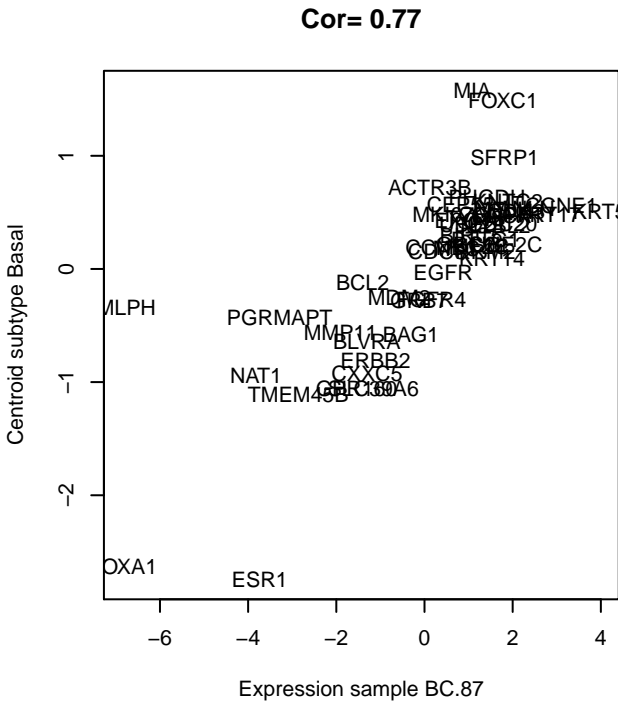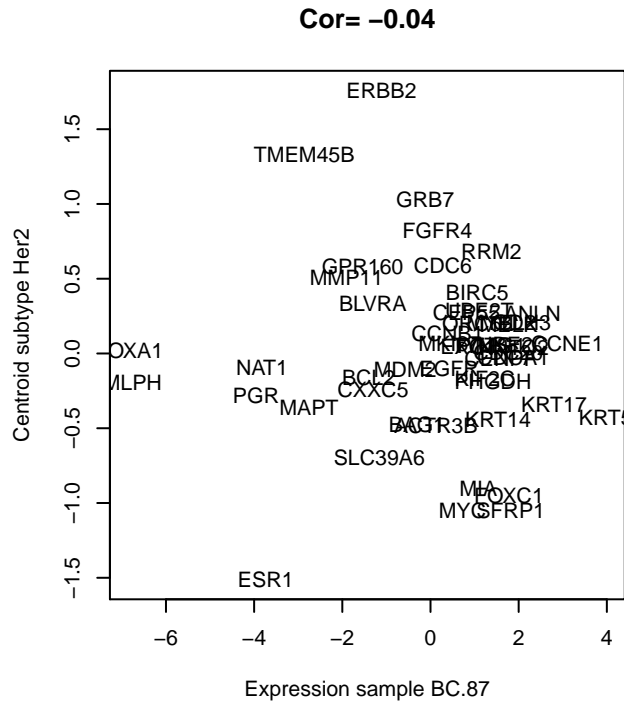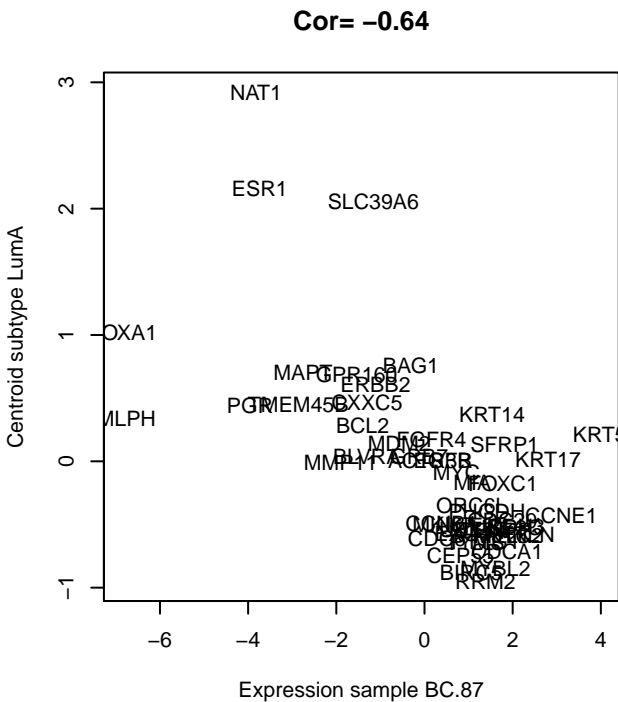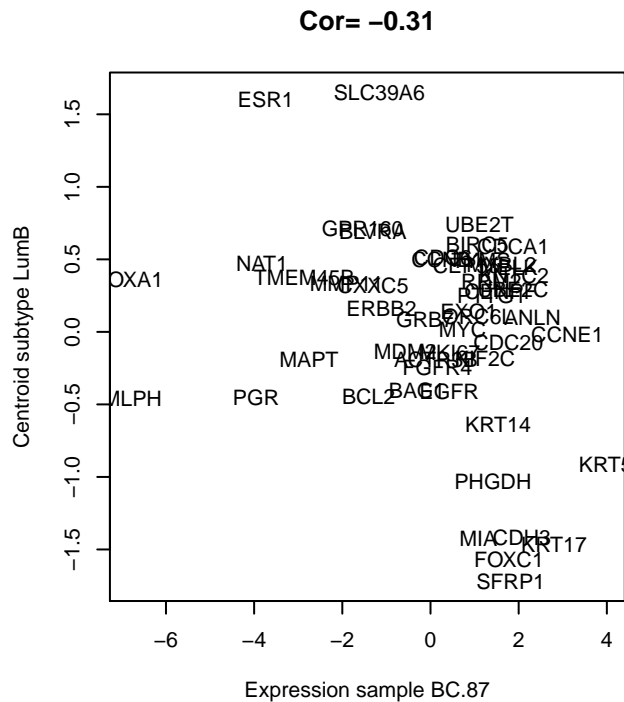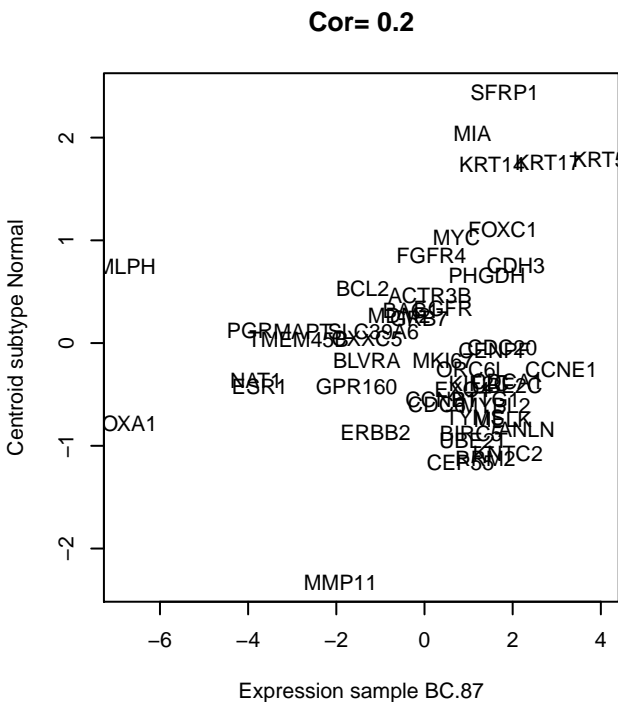

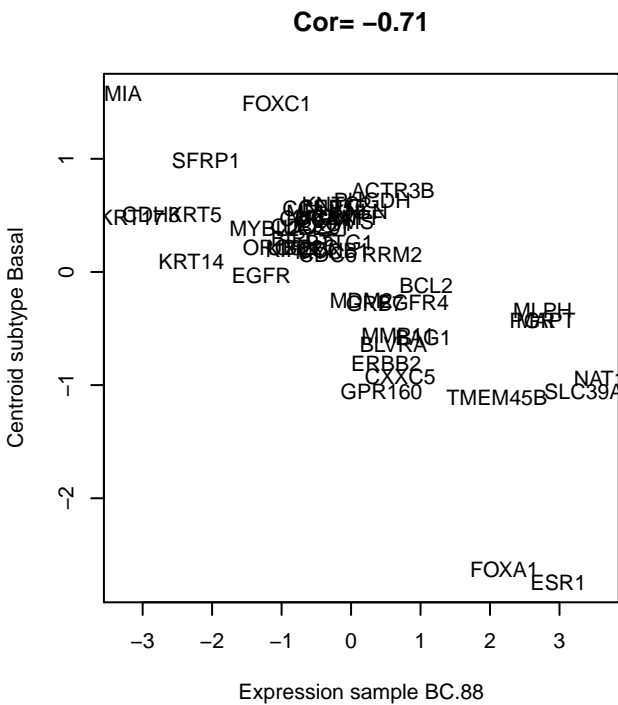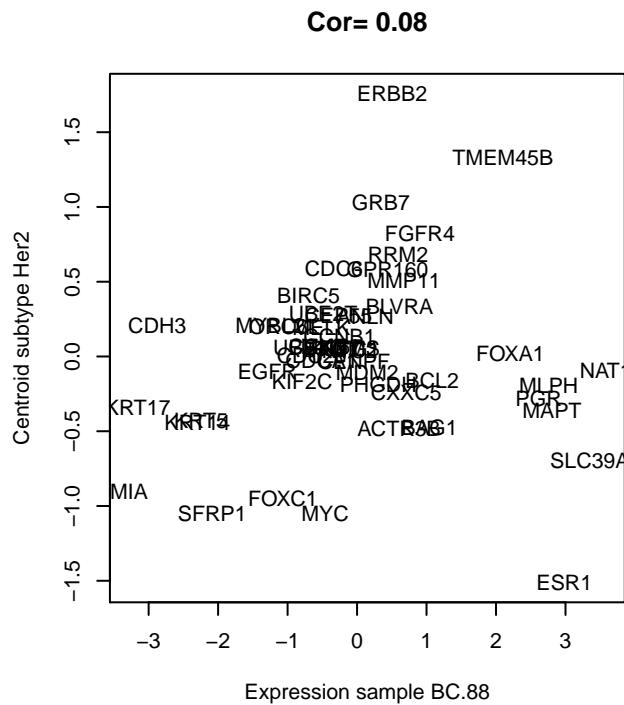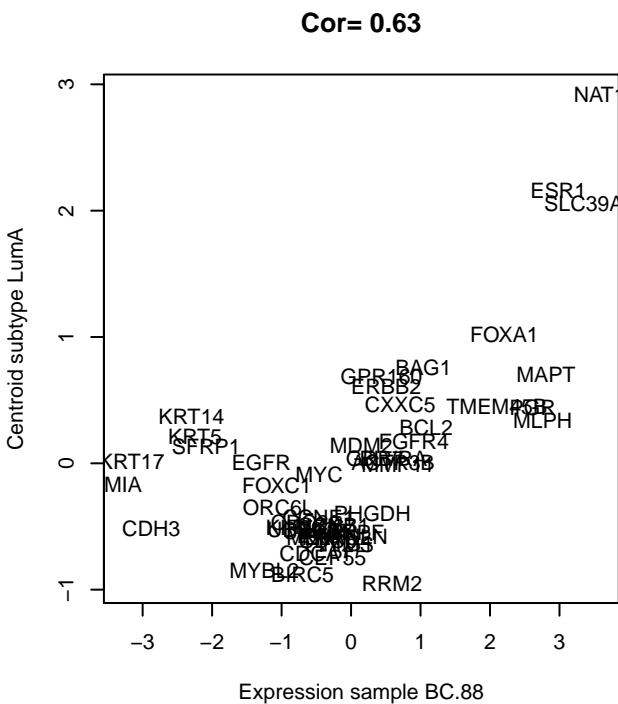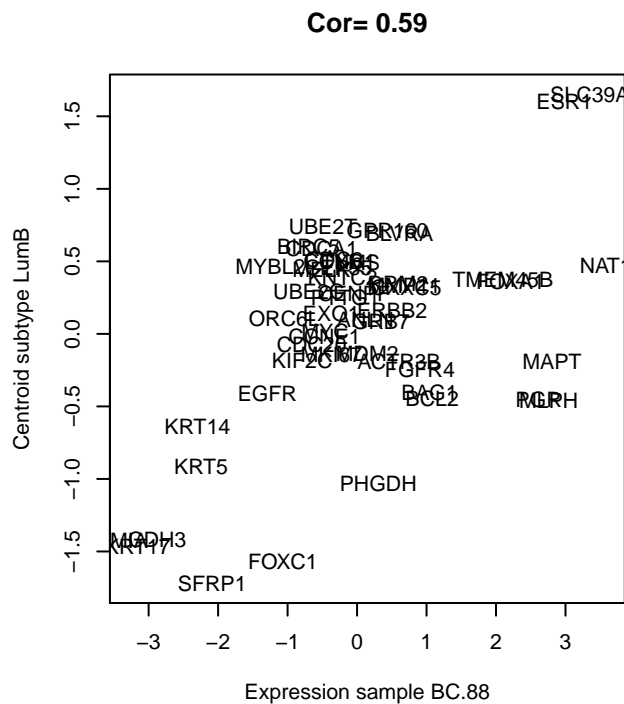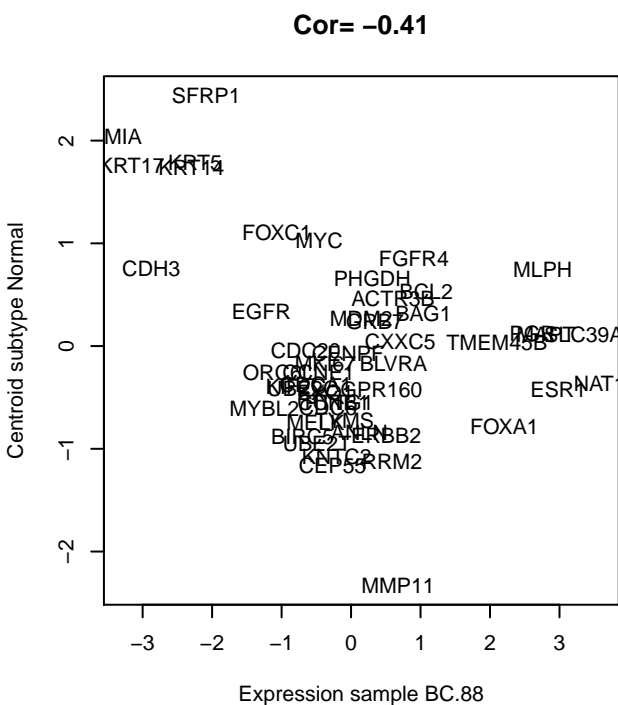



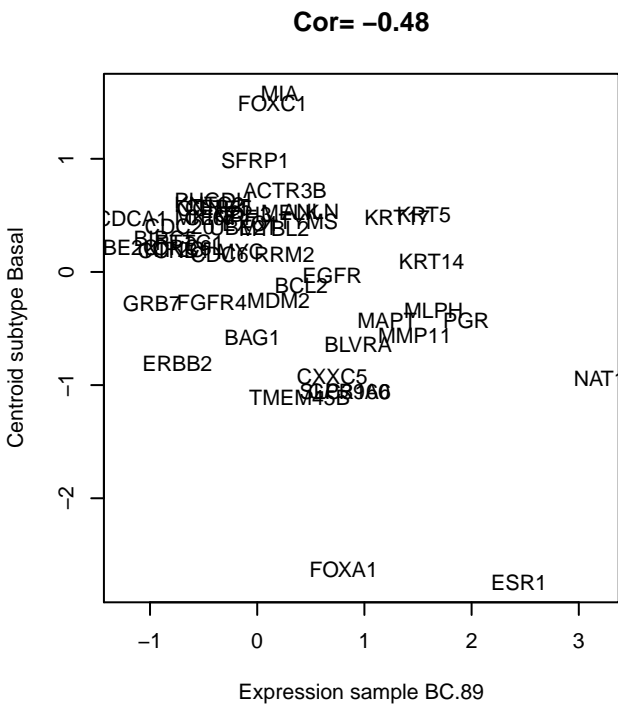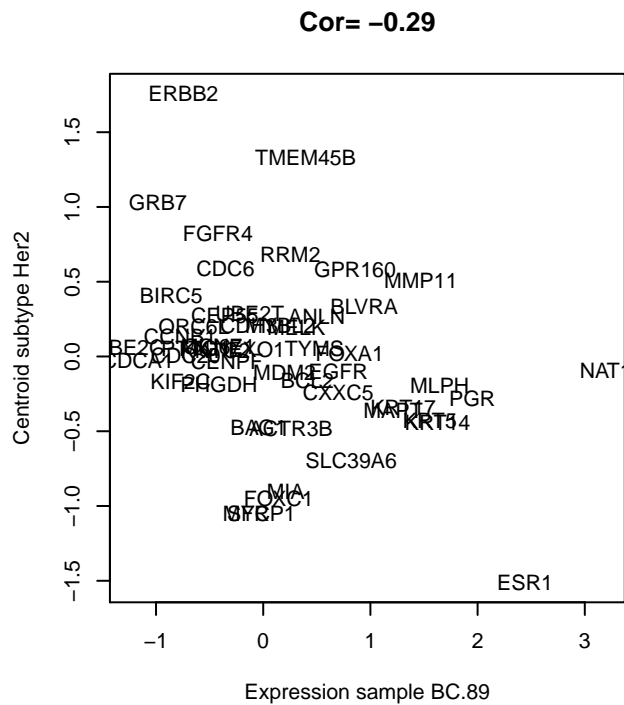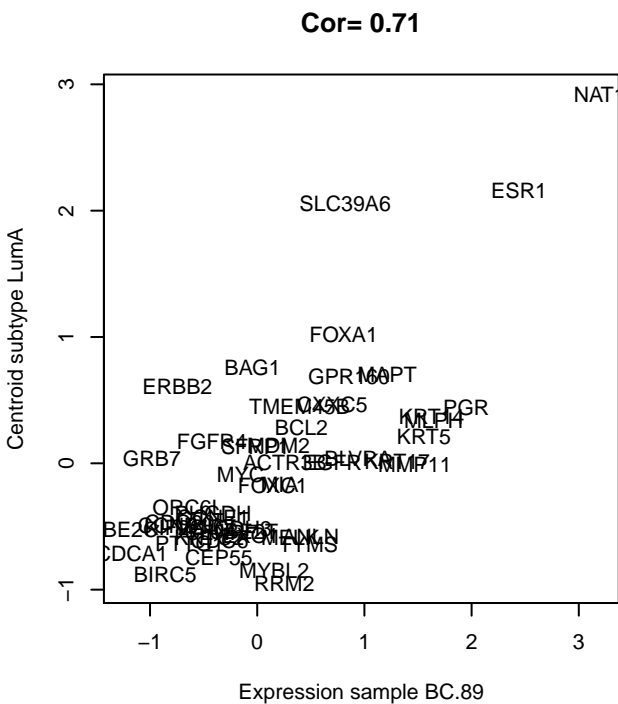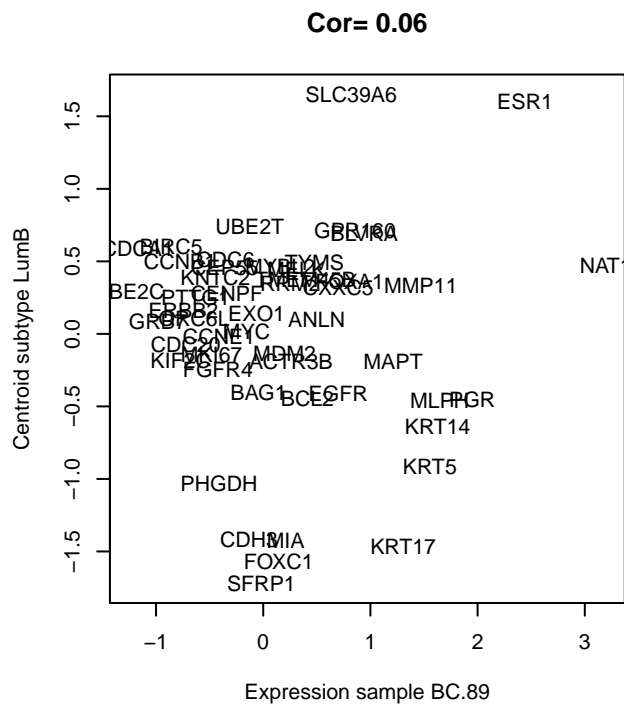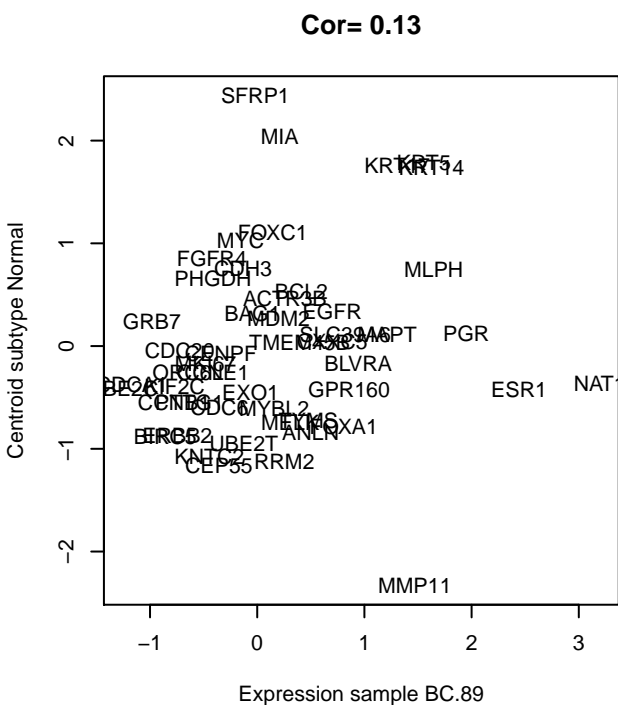

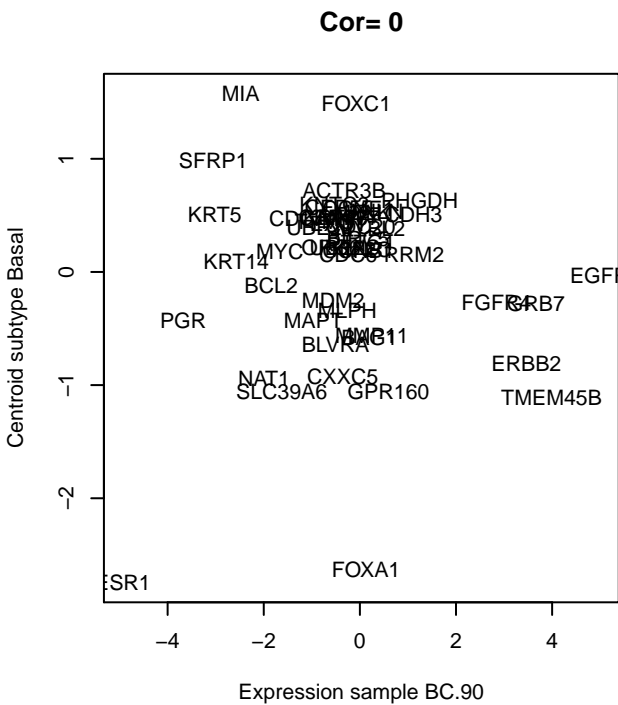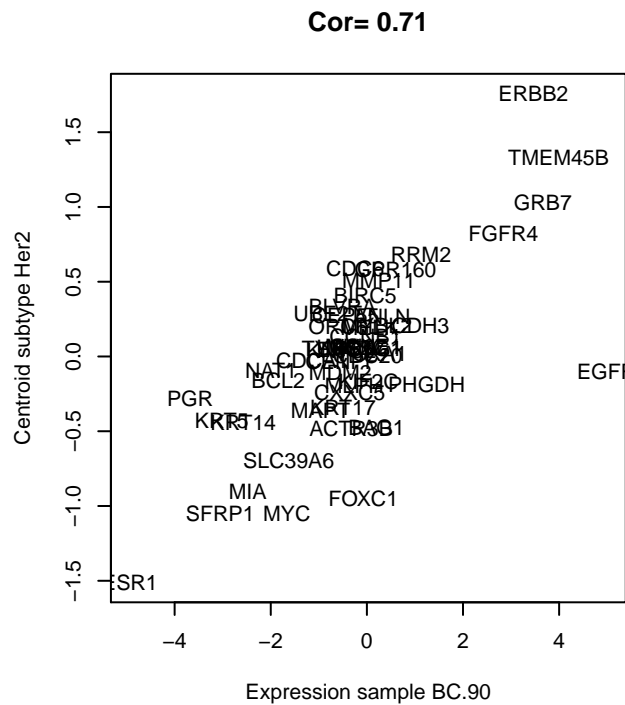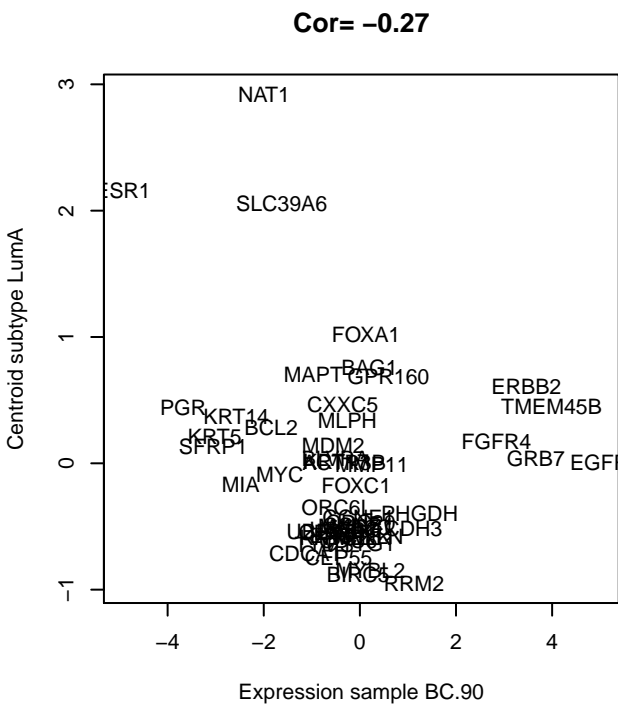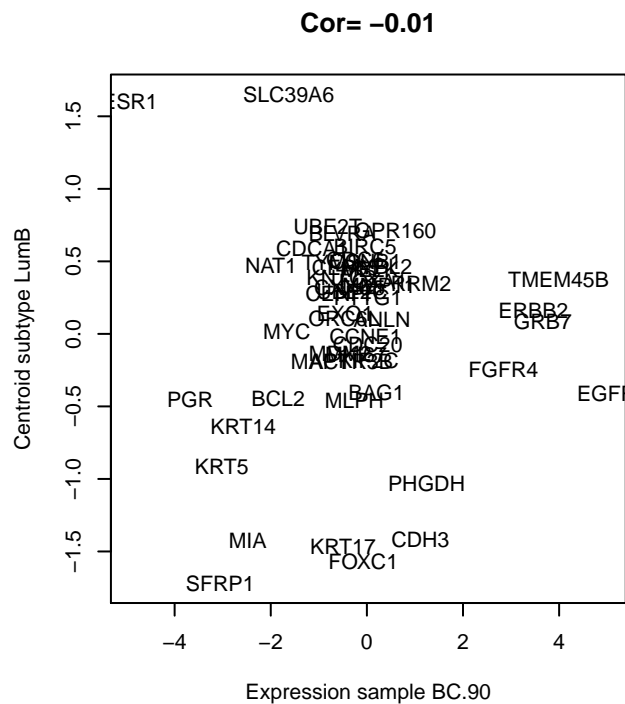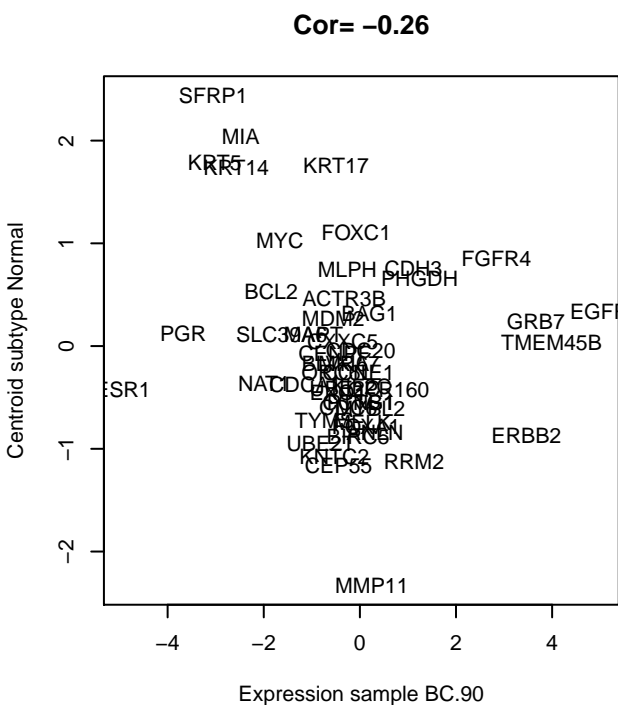

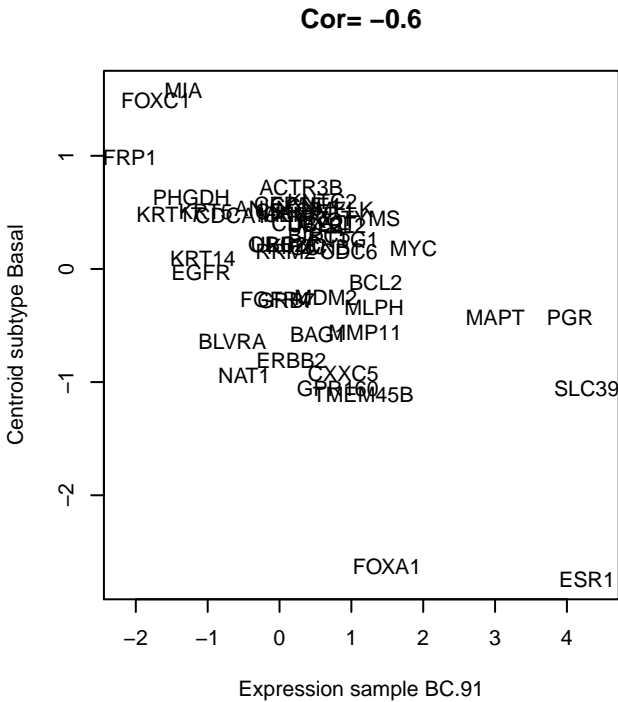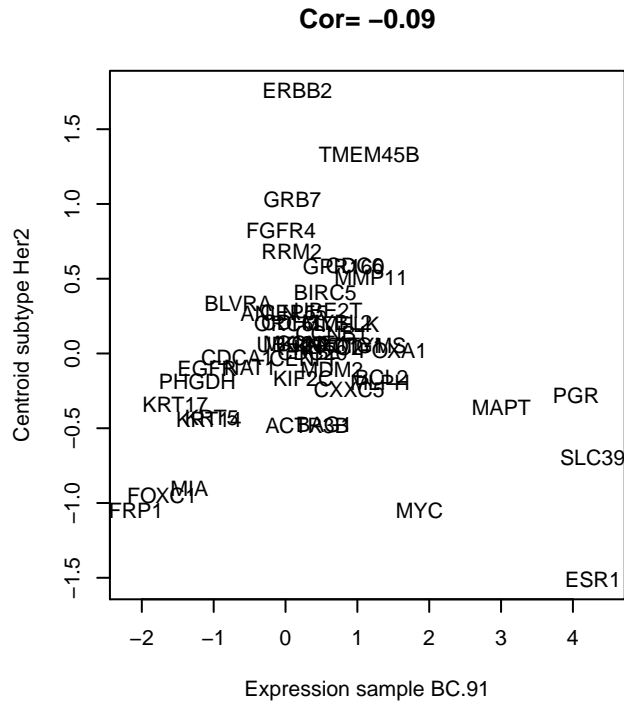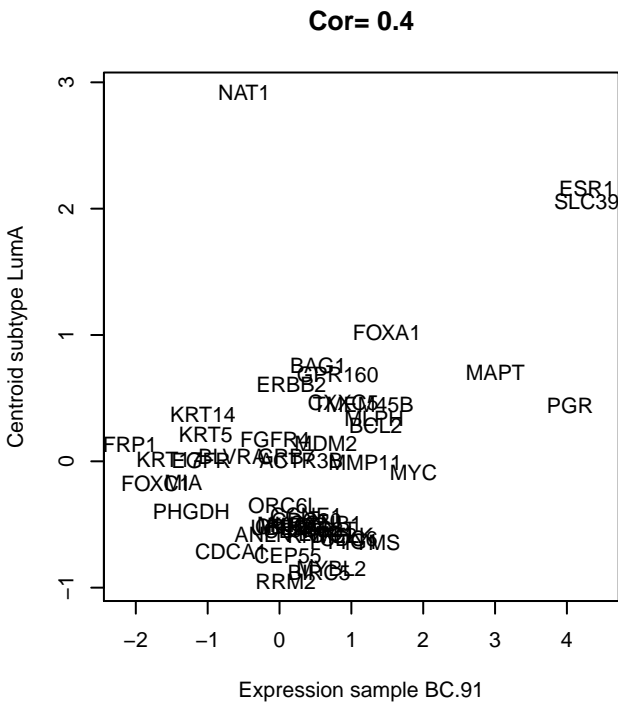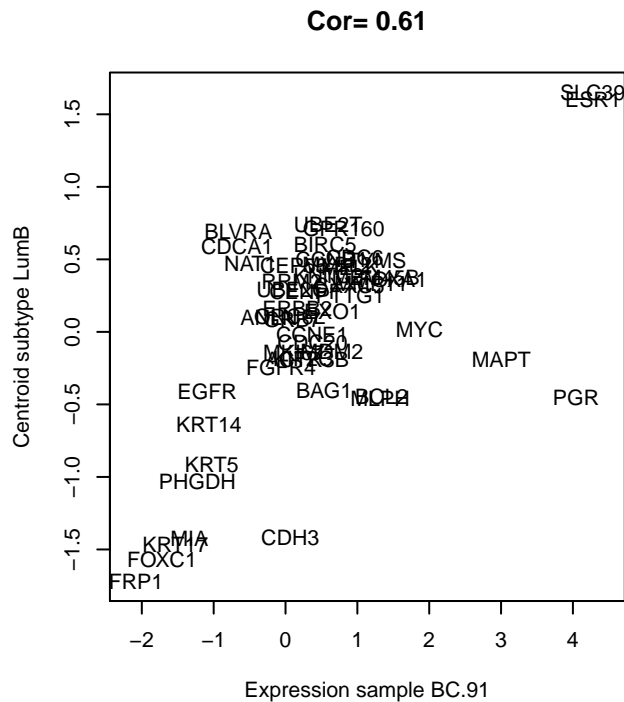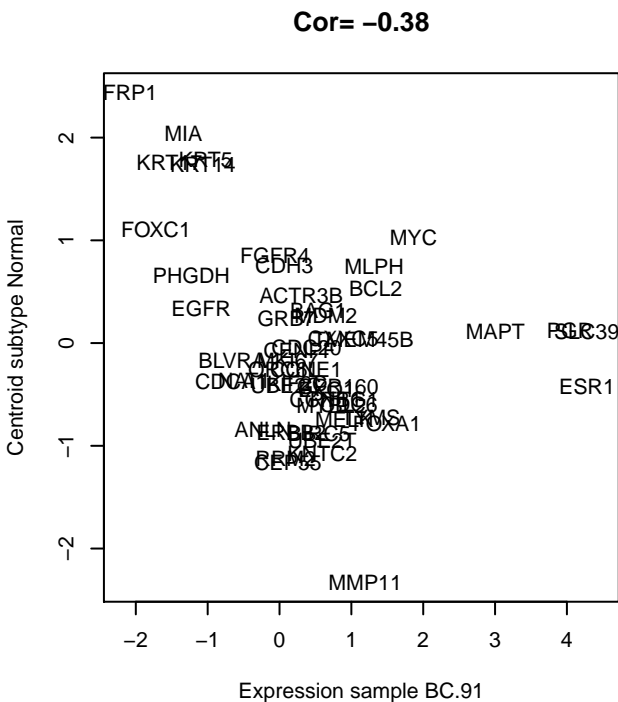

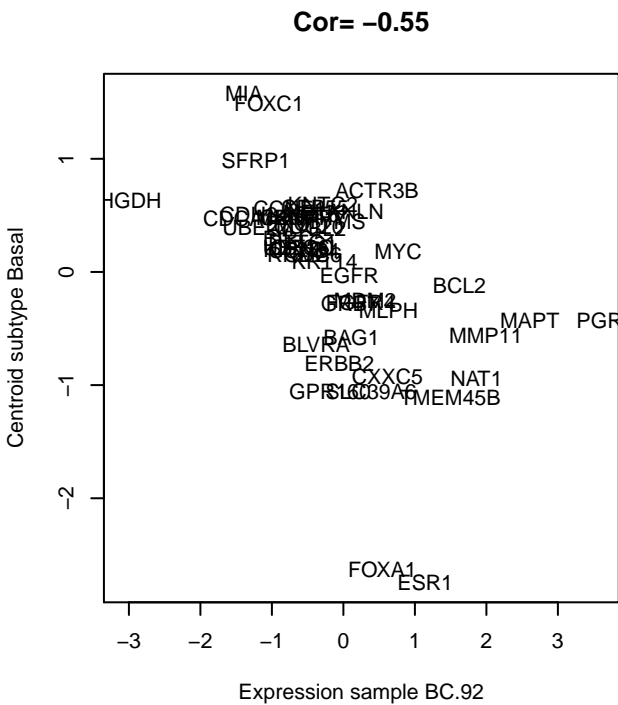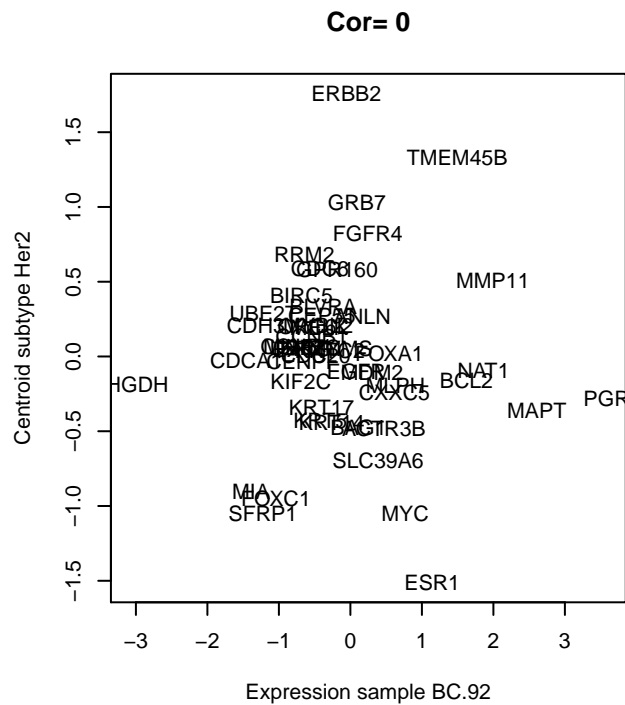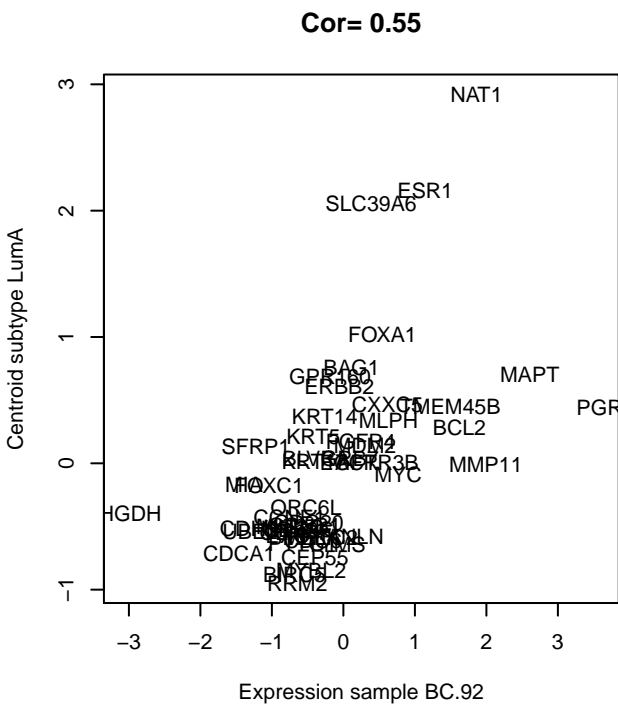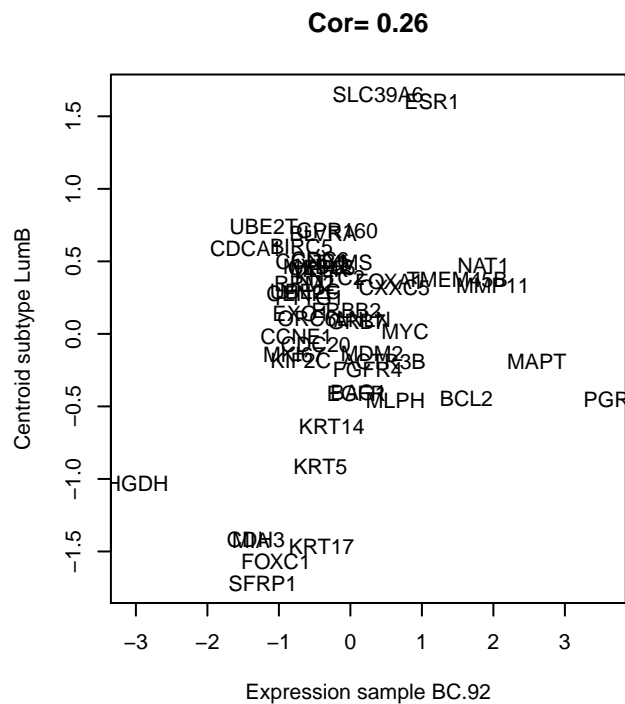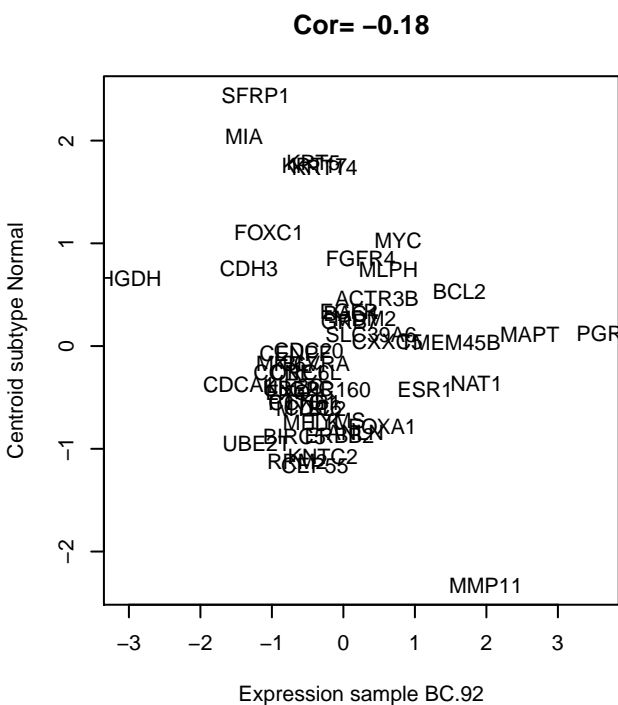



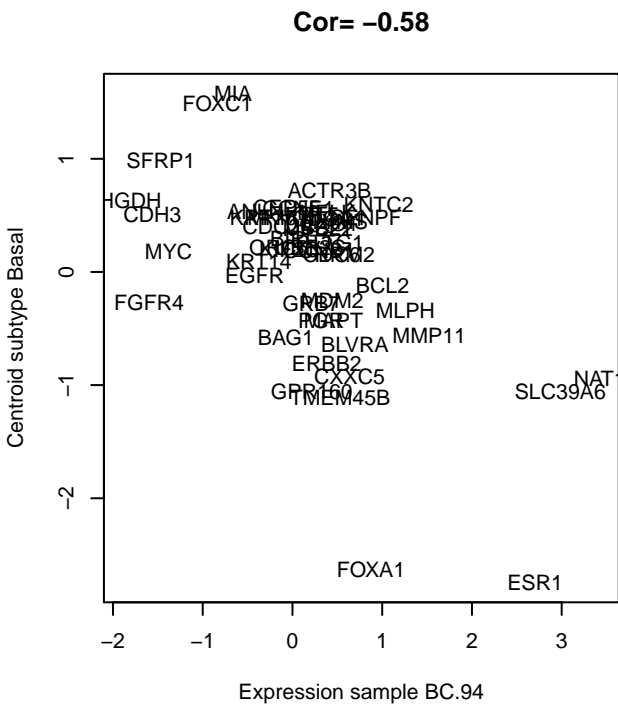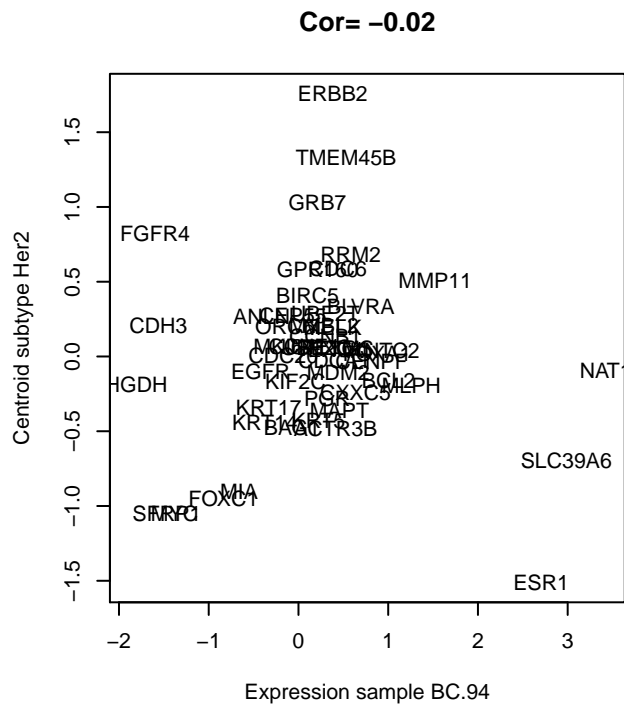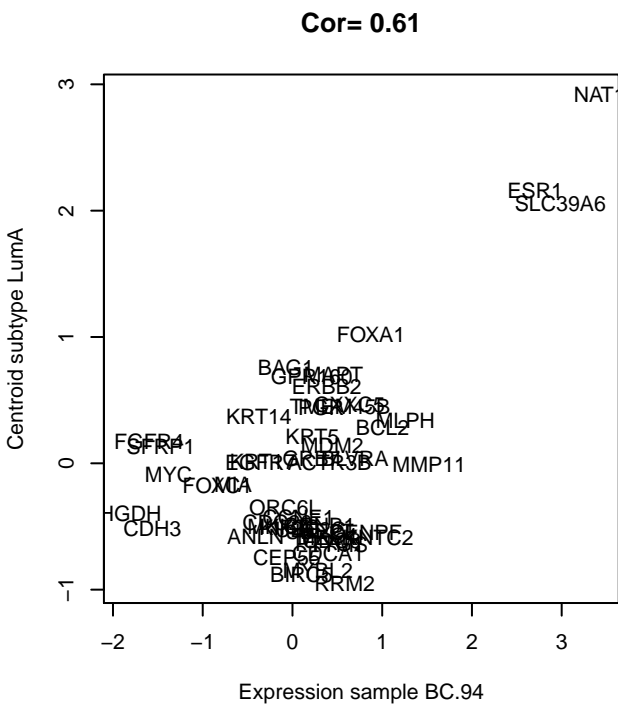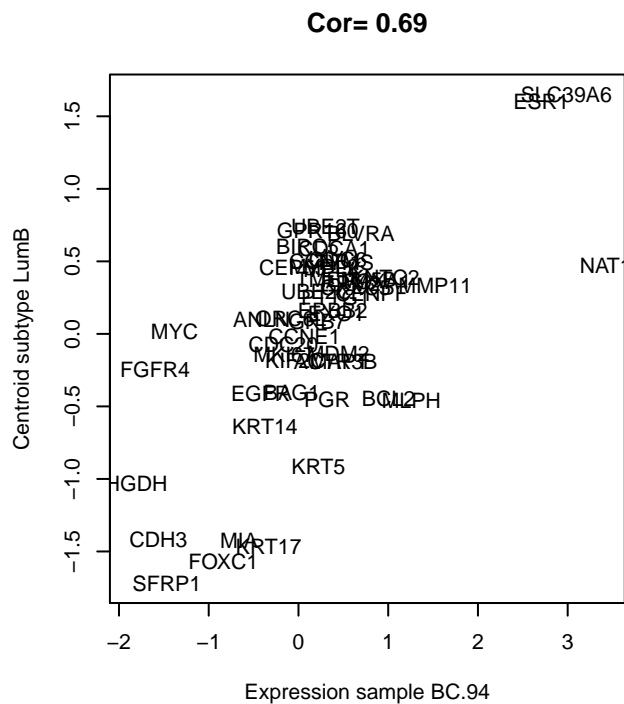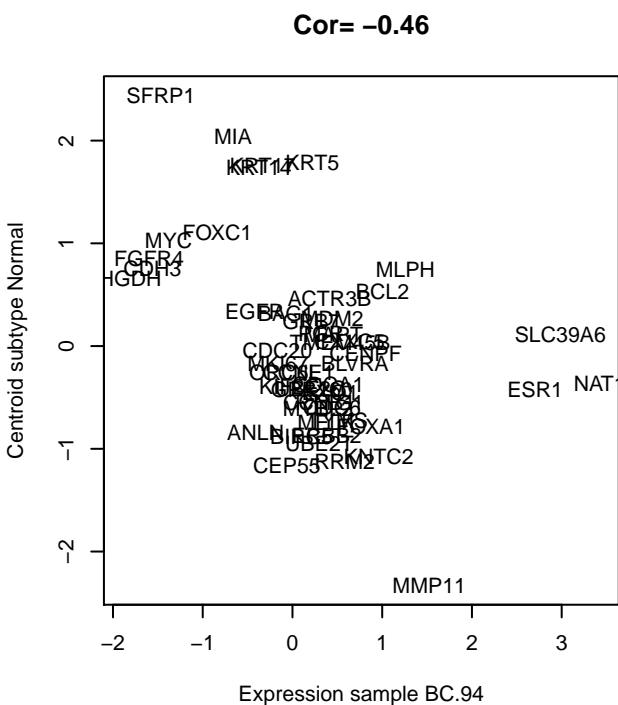

Supplement: s1 [file s1]

Supplementary Figure S1

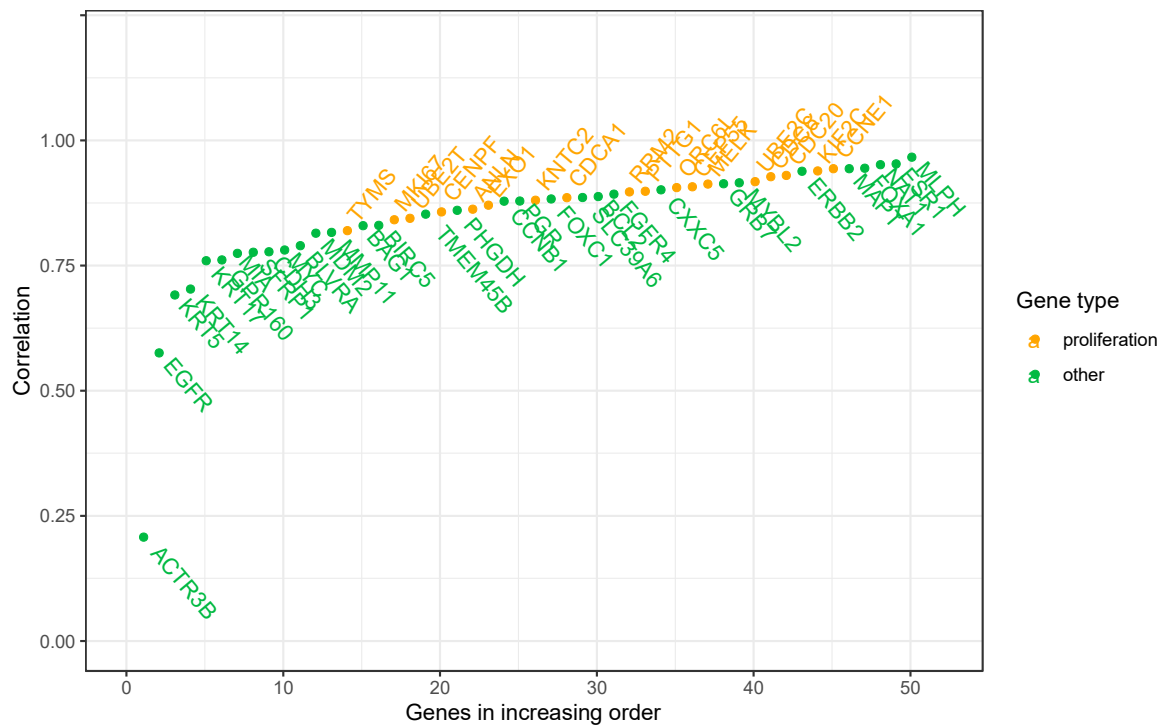

Supplementary Figure S2

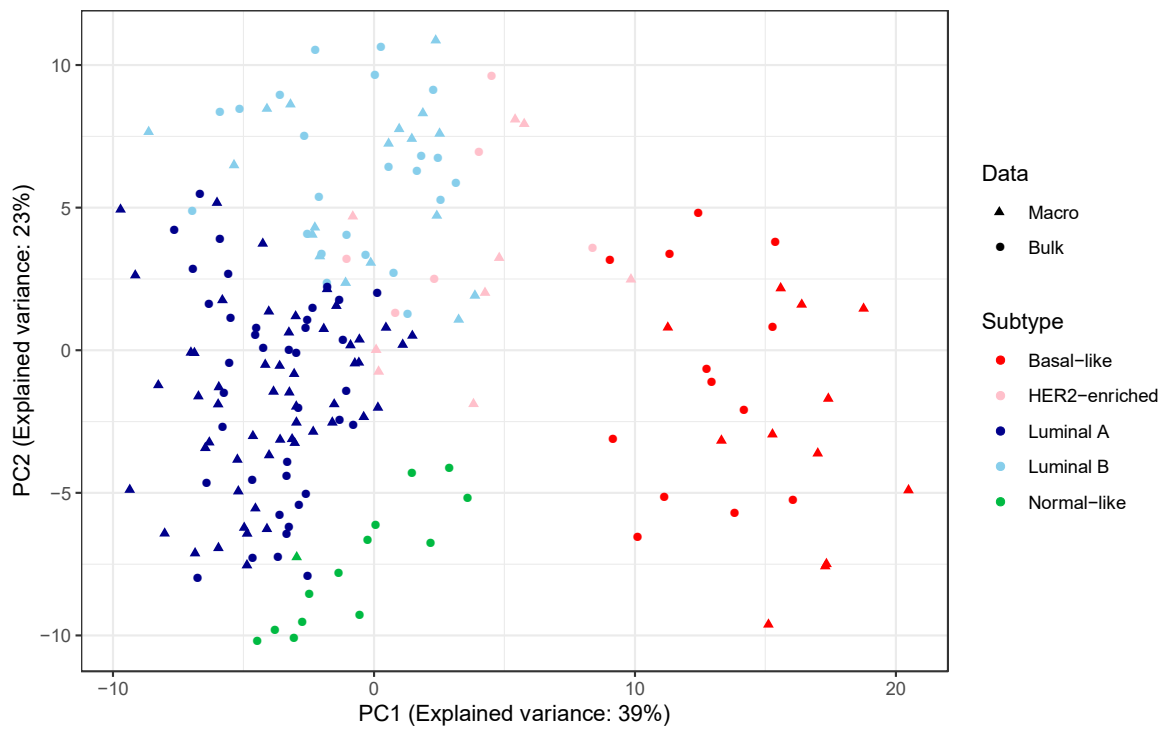

Supplement: s1 [file s1]

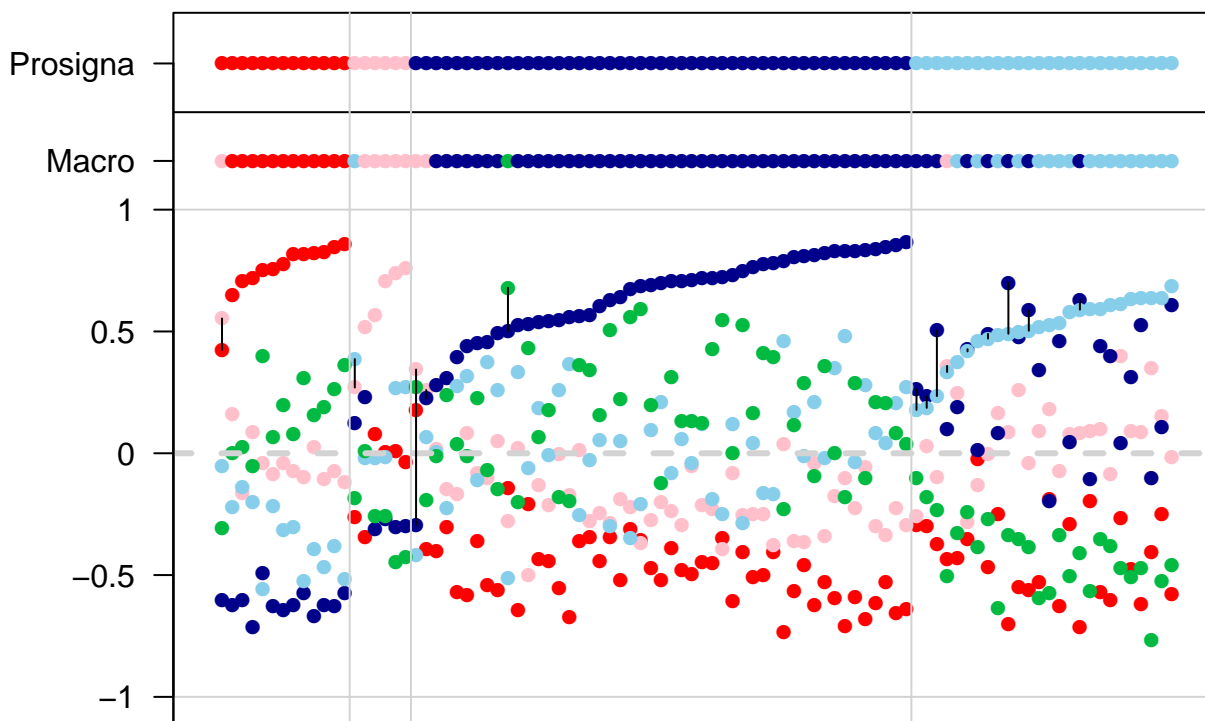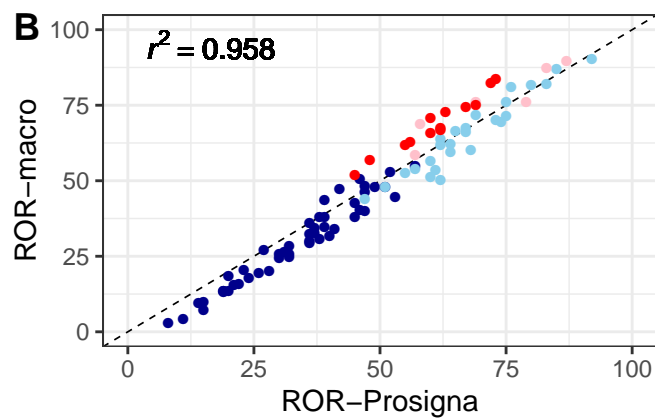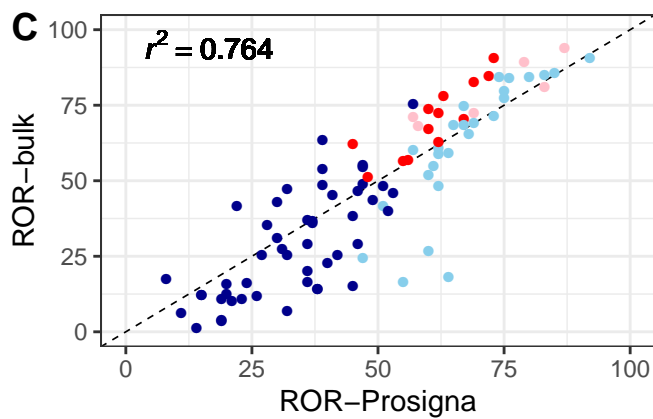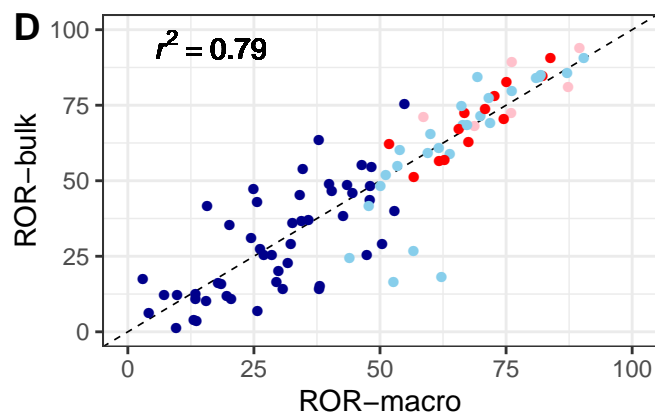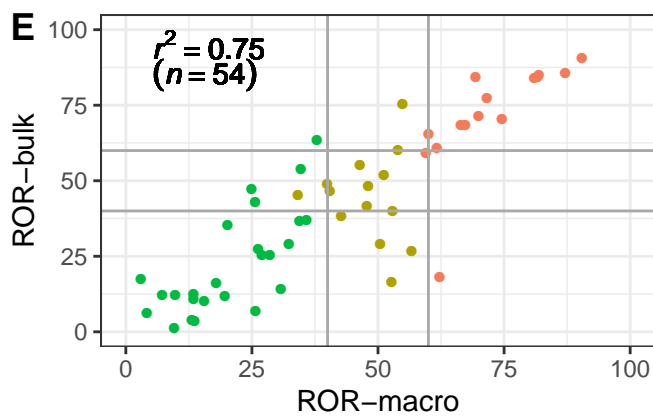

Supplement: s1 [file s1]

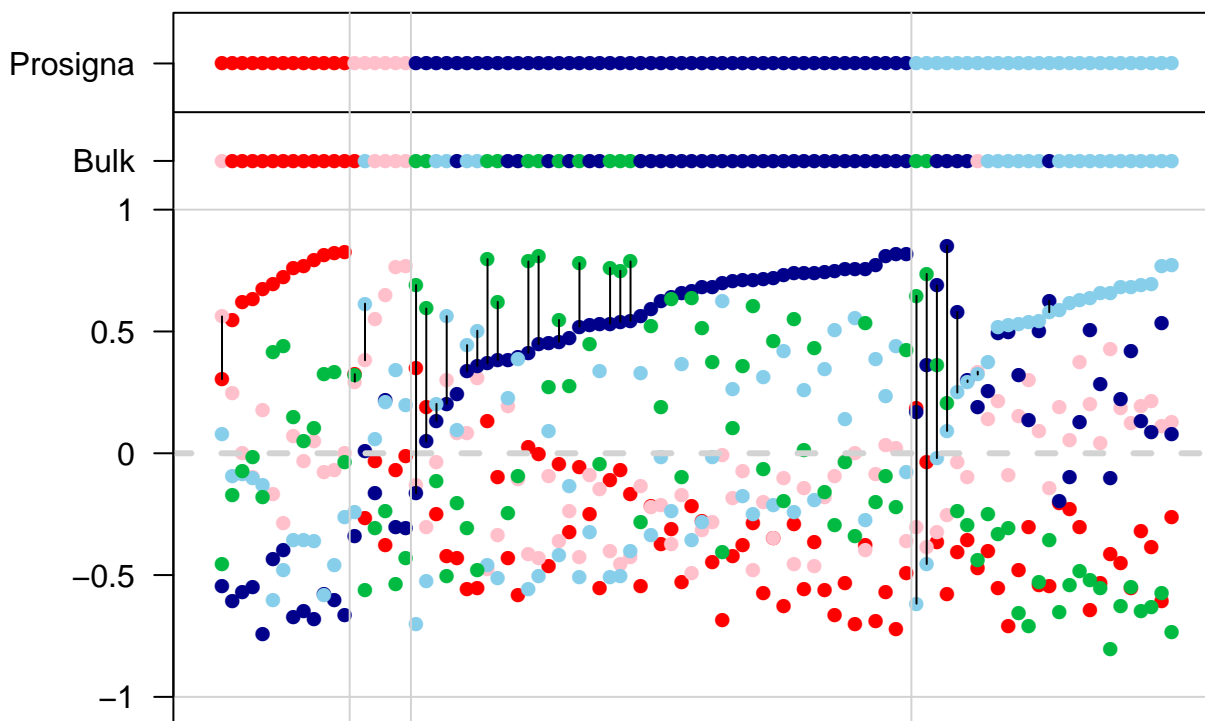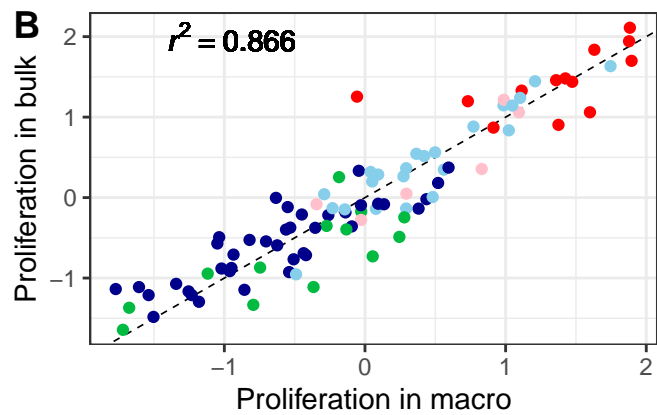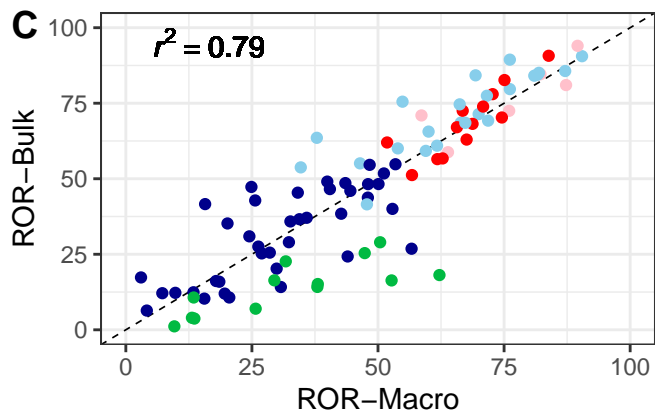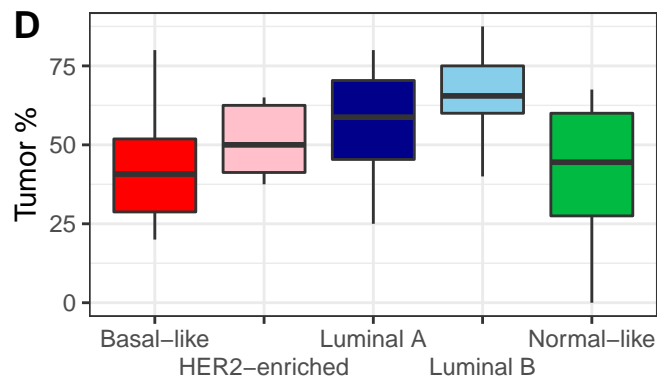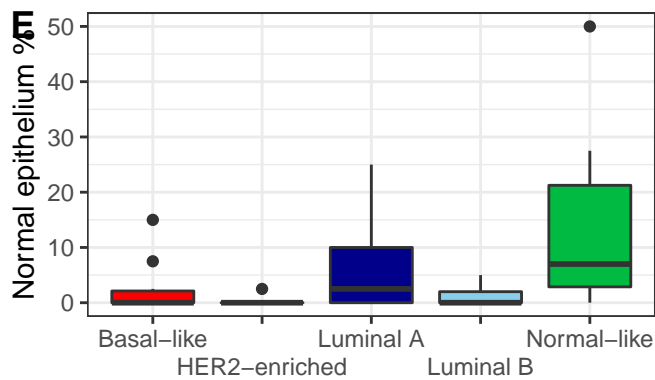

Supplement: s1 [file s1]
